# Supplementary material for: Transcriptome-wide investigation of circular RNAs in rice
Source: RNA. 2015 Dec;21(12):2076–87. doi: 10.1261/rna.052282.115 (PMC4647462; doi:10.1261/rna.052282.115)
Supplement: Supplemental Material [file supp_052282.115_TableS2.xlsx]

## Sheet: rice-circRNAs
accessNo.	representative sequence	chr.	exon-start	exon-end	ori.	AG/AC	GT/CT	leaf polyA(+)-backsplice-depth	panicle polyA(+)-backsplice-depth	leaf polyA(-)-backsplice-depth	panicle polyA(-)-backsplice-depth	total-backsplice-depth	MITEs: upstream 500bp	MITEs: downstream 500bp	Genomic location of backsplicing sites	Left backsplicing site in comparison with known junctions				Right backsplicing site in comparison with known junctions
																chr.	Genomic location	ori.	RAP2 gene	chr.	Genomic location	ori.	RAP2 gene
Os07circ17948	HWI-ST620_0173:6:1305:20789:183543#0/1_A_GGGGACGGCCGGGAGGAAGGTGGGGGTGAGCGAGGTGGAGAAGAGGGTGGACGCCATGGCGAGGCGAGGTGAACTTGGCGCGAAATCATCCCGAGGCGGA	chromosome07	26871959	26873360	minus	AC	CT	199	53	2	1	255	null	null	intergenic-intergenic	null	null	null	null	null	null	null	null
Os09circ11453	HWI-ST620_0166:6:2204:12063:65862#0/2_A_CCATTCCGCTCACATCGCAGCCTCGCAAGGAGGAAGGAGGTGGTTTCTTGACTTGATGGAGGCAGCCAGCAGAAACGAACAAGCAGAAGAGTCAAAGCCA	chromosome09	23570797	23571251	plus	AG	GT	6	1	116	35	158	null	null	3utr-3utr	chromosome09	23570797	+	Os09t0568000-02	chromosome09	23571251	+	Os09t0568000-02
Os02circ29230	HWI-ST620_0166:6:1204:11342:157280#0/1_A_GCCTACCATGCATGATGCTTGATCCCCAAAGAATAGACAATTAAGCTTAGTCAAGGAAGATTCTACTGCGATCCAGGGGCTGAGTGCAATCTTCTATATA	chromosome02	35039349	35039607	plus	AG	GT	2	0	132	19	153	self-complementation	self-complementation	3utr-3utr OR cds-intergenic	chromosome02	35039349	+	Os02t0801900-02	chromosome02	35039607	+	Os02t0801900-02
Os02circ16776	HWI-ST620_0166:6:1203:15556:134354#0/1_A_TAGCCCTCCGAAAGCTGGAGTAACAGGCACGCGCGACCGAGCCCGGCTAAAGAGTTGGTAGTGGGGGGTTAAGTGGGCGAACCCATGCACCACGAAGAAG	chromosome02	23725269	23725965	plus	AG	GT	1	2	7	142	152	null	null	intergenic-intergenic	null	null	null	null	null	null	null	null
Os02circ00436	HWI-ST620_0166:6:2206:16175:60870#0/2_A_GTGATCTTCACGTCCGAACCAGGCTTCAGGTCACCGTCTTTTGCAGCGAGGTCGATCATGATGTCGTCGATGCCTTTCTCCATGCCCTTGAGGCCGCACA	chromosome02	183986	184453	minus	AC	CT	14	0	70	13	97	null	null	cds-cds	chromosome02	183986	-	Os02t0103800-02	chromosome02	184453	-	Os02t0103800-02
Os05circ03807	HWI-ST620_0166:6:2307:15031:53633#0/2_A_CAGCGCGGGTCTCATTCAGGTCTACCGCAAACAGCTGGGCGACAAACTGCTTGTAAGCTAAAACTGAAGCTTAGCACAGATGGACGCCGAAGTTATTTCA	chromosome05	3609025	3611179	plus	AG	GT	5	5	37	45	92	null	null	cds-3utr	chromosome05	3609025	+	Os05t0161200-01	null	null	null	null
Os11circ09617	HWI-ST620_0166:6:2105:2506:80287#0/2_A_TCAAATGAGAAATCCGCATTTCTACAAAAGAACCTCGGGGAGGGAGCACATAAATCTGTTGGCAGCAGGTACTTGATCATAATTGAGGATTTATGGGCCA	chromosome11	29934000	29936147	plus	AG	GT	3	7	19	58	87	CACTA (self-complementation)	CACTA (self-complementation)	cds-cds	null	null	null	null	null	null	null	null
Os02circ12314	HWI-ST620_0166:6:1205:10539:46982#0/1_A_CAAGCTCTTCCACAGTACAGCGATCAAATTGAGAAGCTTTCTCTTCATGTTGAGCATTGGGATGTTCCTGAATGACATGTCCGGAAGAAATCCGTTATAC	chromosome02	15698799	15704204	minus	AC	CT	2	0	34	48	84	null	PIF/Harbinger || hAT	5utr-cds	chromosome02	15698799	-	Os02t0452500-01	chromosome02	15704204	-	Os02t0452500-01
Os11circ01209	HWI-ST620_0171:8:2104:20482:175489#0/2_A_GAGCACCACGAGAAGAAGAAGGACCACAAGAGCGCCGAGGGGTCCACCGGCGAGGAGACGCACCACCACCACCTGTTCCACCACAAGAAGGACGACGAGC	chromosome11	3260676	3261178	plus	AG	GT	55	26	0	0	81	null	Tc1/Mariner	intergenic-intergenic	null	null	null	null	null	null	null	null
Os01circ00260	HWI-ST620_0167:7:2203:8067:108994#0/1_A_CACGCCTCCTCGGGGAACACCGTGGTGGGCTCGTCGTAGGATAGGTAGTGGAGCAGAGGAGGAAGGATGATAGAAGACTCCAATTCTCCATGGATGGGAA	chromosome01	168538	168773	plus	AG	GT	78	1	0	0	79	PIF/Harbinger	null	intergenic-intergenic	null	null	null	null	null	null	null	null
Os02circ29305	HWI-ST620_0177:7:1103:6913:34689#0/1_A_GTGTCTCTGTACTGCCTGTGTATCTACAGTAATGGCCCTCATAAGCATGTTCAGAGCAACGTATTCTGATGTCGATGGAAATCGTGACGAGAGCTTCAAA	chromosome02	35195447	35197475	minus	AC	CT	0	0	19	54	73	null	null	cds-3utr	chromosome02	35195447	-	Os02t0805000-01	chromosome02	35197475	-	Os02t0805000-01
Os03circ00204	HWI-ST620_0166:6:2104:5154:182052#0/2_A_GTGACAAGGAAGCTGAAATCAGATGGCAATTAATGTGGATATGATACTTGCGCACAATCTTAACGAAGAGATGTAAGGGGGCAAATCCAACGACTGAGGA	chromosome03	266628	267062	plus	AG	GT	0	0	70	2	72	null	Mutator	intergenic-intergenic	null	null	null	null	null	null	null	null
Os01circ10434	HWI-ST620_0167:4:1305:14814:72734#0/1_A_GGGGTGTTTCTGCGAAAGTGCGAGCGGGGTTCGGTGCGGTTTAGGTGGGGTCGCCGGCGAGGCGGCGGTCTGCCCGGACTGCTGCTGCTGCTGCGACGCC	chromosome01	13012934	13013356	minus	AC	CT	63	4	0	1	68	PIF/Harbinger	null	intergenic-intergenic	null	null	null	null	null	null	null	null
Os05circ06781	HWI-ST620_0171:6:2103:6072:176102#0/1_A_CGTTCTTTAGGCATTTAATGGTATTCTTTTCAGTGCTAATTTTGAGAAGAGCAAACATGTGAATCATCCCATCTGTTGCAGAAGCTGCCAAGATTTTTCC	chromosome05	13416340	13418689	minus	AC	CT	1	0	14	51	66	null	null	5utr-cds	chromosome05	13416340	-	Os05t0299300-01	null	null	null	null
Os06circ10079	HWI-ST620_0166:6:1206:10749:47105#0/1_A_GTATGGGAGATGTGATGCAGTCATCTGTACATGTACGCATCAACATCAAAAGGATCATCATTCGTGTCCACGAGGAATCCTTGGCTAACCGAGCAATCCC	chromosome06	16894944	16900495	plus	AG	GT	8	0	51	0	59	Mutator	null	cds-cds	chromosome06	16894944	+	Os06t0476200-01	chromosome06	16900495	+	Os06t0476200-01
Os05circ02698	HWI-ST620_0166:6:2206:8127:19265#0/2_A_TGACAAATGCACATTGTGTTGAGCATGACACCCAGGTCAAAGTAAAGAGAAGGGGAGATGACAAAAAATATATTGCCAAGGTCTATTGCACTCATATTGC	chromosome05	2726984	2728053	plus	AG	GT	0	0	50	8	58	self-complementation	self-complementation	cds-cds OR 5utr-5utr	chromosome05	2726984	+	Os05t0147500-02	chromosome05	2728053	+	Os05t0147500-02
Os02circ01494	HWI-ST620_0177:8:1208:2763:116351#0/1_A_GTGTCATCCAGCGGGTCGAAGTCGAACCTCTCCTGTCTATCCGGCGCCCACGACCTGTACCTCTCCCCGGGCTGCTTGAAGTCGTTCTGCTTGTGTATCG	chromosome02	825863	826354	minus	AC	CT	19	35	0	1	55	Tc1/Mariner	null	cds-cds OR 5utr-intergenic	null	null	null	null	null	null	null	null
Os09circ09690	HWI-ST620_0173:6:2101:18034:169254#0/2_A_CCTCTCAAGACAAGAGGGAAACAAACCAACAATTTACTGGAATATAAGCAGCCAATGGGAAGGCATTTCTCCAAGCCTGACCACAAGAACACCGAGAAAA	chromosome09	21770310	21771346	plus	AG	GT	31	16	1	2	50	null	null	intergenic-intergenic	null	null	null	null	null	null	null	null
Os10circ07116	HWI-ST620_0171:3:1105:12840:135580#0/1_A_GGGATGAGGGGTATTCTGGTCTTTTCACAGCTTCGAGTTCAAATGGGCCAAGACCAGAGATGTCACCGGTCAAATCCTGGGGCTCGAAGGACATCTTAGC	chromosome10	19669380	19671188	plus	AG	GT	10	33	0	4	47	null	null	intergenic-intergenic	null	null	null	null	null	null	null	null
Os05circ11195	HWI-ST620_0166:6:2206:3181:172930#0/2_A_TCCCCACCGGCCATCCGCTCCGCAAGGTGCCTGCAATGATTTTATCTAGACATATGCTGGTGCTGAGTCCATTGCTTGCCTTGATGTCGGATCAACTGAG	chromosome05	20796752	20798932	plus	AG	GT	1	0	40	5	46	null	null	3utr-3utr	null	null	null	null	null	null	null	null
Os09circ02967	HWI-ST620_0166:7:1302:12813:135084#0/1_A_GACCCCGTCCAGATCCATGCCCGACTCTGCATCTTGGTCTTGTAGAACGGCTGCGTGCAATGCATTTTGTCTATTTGGGCCAGAGTACGAAAGATTCCCG	chromosome09	11236502	11237041	minus	AC	CT	5	3	35	2	45	null	Mutator	cds-cds	chromosome09	11236502	-	Os09t0343200-01	chromosome09	11237041	-	Os09t0343200-01
Os02circ25099	HWI-ST620_0171:4:1306:16935:106439#0/1_A_GGGGAGGGAGGGTGATGATGACCACGCCATGGAGCTCCAATTTGTTCCTAGATTTCCTGCCGACGCCCCCTCCGCCGTCATTATCGAATCTTCTGGCCGC	chromosome02	31296864	31297337	minus	AC	CT	13	27	1	2	43	null	Tc1/Mariner	cds-cds	null	null	null	null	null	null	null	null
Os02circ25329	HWI-ST620_0171:6:1302:9034:78723#0/1_A_GTGGCCGTCTCGTCCCGCGCTTCAAGGAGGAAATGTCGCTCTTGCCCTTTTAGTGTCTGCTTCGTTTCAGAGAGAGGCCAGGCGGCGTGGCGGACAAGCA	chromosome02	31505785	31506353	plus	AG	GT	0	3	0	33	36	PIF/Harbinger (self-complementation)	self-complementation	intron-intron	null	null	null	null	null	null	null	null
Os05circ14065	HWI-ST620_0166:8:2204:2166:171129#0/1_A_TCCTCCGATCCAAACTTGCAGGCCCATCCAACTATCACCATCTGAAGGTTAGAATCTGCTTCTGACATCAGCTGTCTTACACTGAAGTTGTGGCCAAGTT	chromosome05	24293818	24294550	minus	AC	CT	0	1	14	18	33	null	null	cds-3utr	chromosome05	24293818	-	Os05t0492500-01	chromosome05	24294550	-	Os05t0492500-01
Os11circ11984	HWI-ST620_0167:7:2101:10603:58058#0/1_A_CCCCAGCAACTGAATTATTGAGATATGCTCCGTATTTCCATGCACTGCACTGCACTCTCACCAGCTCTTAGTTCTCCTTCCCCTGCCGCTGGTCACGCAG	chromosome11	31173123	31176436	minus	AC	CT	29	1	1	0	31	null	null	3utr-3utr OR cds-intergenic	null	null	null	null	chromosome11	31176436	-	Os11t0708000-01
Os09circ05536	HWI-ST620_0177:7:1206:15487:124436#0/2_A_CGTGGTTGTGAGTTCATTGTCTGTGATGTTGATTCGGGTTCTTGGATAATATTCATTGTTCTTGGTTGTGACTTTAAAAAATGGTGGAGTCAGACTTCTC	chromosome09	16418158	16418263	minus	AC	CT	2	0	22	6	30	null	null	intergenic-intergenic	null	null	null	null	null	null	null	null
Os06circ07436	HWI-ST620_0166:6:1202:19123:29664#0/2_A_GCTTGTCCTCGATCGCCTCCCACAGCGGCACGGAGTTGATGGCGCCGACGACGACGGTGGTGAGCCAGAGGGCGACGACGGCGCCGCCGCTGTAGAGGAG	chromosome06	8751086	8751193	minus	AC	CT	0	0	29	0	29	null	null	ncRNA-ncRNA	chromosome06	8751086	-	Os06t0264800-02	chromosome06	8751193	-	Os06t0264800-02
Os11circ02512	HWI-ST620_0171:3:1201:9919:116550#0/1_A_GCTTGGTAAATGTTGGGCACCATTTCAAATCCCTTTTCAAAATAAACGATCCACGTTCACTTATCAGCCCCAACGTCTTAGCTTCCGATAAACCTTCCAA	chromosome11	5152709	5156979	minus	AC	CT	10	19	0	0	29	null	null	cds-intergenic OR intergenic-cds OR intergenic-intron	chromosome11	5152709	-	Os11t0202300-02	chromosome11	5156979	-	Os11t0202400-00
Os03circ25430	HWI-ST620_0166:6:2304:19101:41408#0/2_A_CGCTCCTGGCTCTTCGAACACTTCCTCCACCCGTGGATAGGAGGTACAACCACTACTGCGACCAGATGCAGATGGTGGTGAACTTCTTCGACTCGGTGAT	chromosome03	30817431	30817816	plus	AG	GT	0	1	23	3	27	null	Tc1/Mariner	cds-cds	chromosome03	30817431	+	Os03t0732100-01	chromosome03	30817816	+	Os03t0732100-01
Os03circ07398	HWI-ST620_0166:6:1106:18470:175349#0/1_A_GATCCAATTAGTGTTGTGCGAGCGTTCGGTGTCTCTCGAGTCTGCGCAGTAAGATTTCTCCAGCGTTGGGAATCTTCCTAGGCCGAAGACCATCTGAATC	chromosome03	6376343	6377176	plus	AG	GT	2	5	12	7	26	null	PIF/Harbinger	cds-3utr OR 3utr-intergenic	chromosome03	6376343	+	Os03t0220700-02	chromosome03	6377176	+	Os03t0220700-02
Os02circ03807	HWI-ST620_0166:8:2105:13035:107437#0/2_A_GCTCTGGATCCACAGTACAGAACAGCTGTCGGCAATAAGAAAATTACAGATTTAGTTACCAAACAGCAGCAAATGGATGCTGAGCGTGACCATGCCAAAT	chromosome02	1755186	1757809	minus	AC	CT	2	0	13	11	26	null	null	intergenic-cds	chromosome02	1755186	-	Os02t0133300-01	null	null	null	null
Os06circ15052	HWI-ST620_0166:6:2106:11452:46476#0/2_A_GTGGTCGCTGTCCGGCGGGCCGGGGAGGCGGGGTCGGTAGGATCAGCTGGCGCCGTCCGGCAGGGCCCACCTCTAGCTTGCAGTTTTCCTTGGACAACGC	chromosome06	27301454	27302457	minus	AC	CT	1	0	21	4	26	null	null	intron-intron	null	null	null	null	null	null	null	null
Os01circ31126	HWI-ST620_0167:6:2303:8599:107114#0/2_A_CCTGCTGTGTGTACCCGTGTACGTACGTACGTATATGTGTGCCCGTACGTAGTCGTGGTGGTCATGTGGTGGCTTAGCCCCACCGGCGGCTTCCTCGGCC	chromosome01	41412681	41412985	plus	AG	GT	24	0	1	0	25	null	null	intergenic-intergenic	null	null	null	null	null	null	null	null
Os02circ19461	HWI-ST620_0171:6:2104:19588:120985#0/1_A_CTCCTGACAATCTTGGCAGCGTAGCAATTGTGGCTCGGCTAAGCCGGTGTGGTACTCCAGAAGATCGCTCCATAGTGGGCTCAGGGCAAGGCCCAAGGGT	chromosome02	25930358	25931799	minus	AC	CT	0	0	4	21	25	null	null	cds-3utr	null	null	null	null	null	null	null	null
Os03circ18049	HWI-ST620_0167:7:1304:5934:164131#0/2_A_GGACAAGGAGCGCATGGGTGATTGTTACTTTATGGATTGTTTTGATTGGAACAGCAATCTATTTGCAAAGGGCCTACGGAAGAGGAATGTATGGCCGCTC	chromosome03	18572390	18574163	plus	AG	GT	10	15	0	0	25	null	Mutator	cds-cds	null	null	null	null	null	null	null	null
Os03circ04984	HWI-ST620_0166:6:1306:10110:187069#0/2_A_GTGCAAAACCTTACTGATGCATACTTCGGAAGCAGGCGCAGCTTTAGCTCAACTATGGATATCATGAGTCAGCTGGAGGAATAGGAAGAATATCTCCAGC	chromosome03	4204498	4205305	plus	AG	GT	0	0	13	11	24	null	null	5utr-cds	chromosome03	4204498	+	Os03t0180300-02	chromosome03	4205305	+	Os03t0180300-01
Os05circ19237	HWI-ST620_0166:8:1106:2446:47883#0/2_A_CTCGAAAACTATCTCAAAGAAGGCATTCTTCTTGGAGCTGTTCATGGCATCGTGGAGGCTCTGTTTAGGAGATACACAGAGCAAGGAATGGATGAAGAAA	chromosome05	28696412	28696551	minus	AC	CT	1	1	21	1	24	null	null	cds-cds	chromosome05	28696412	-	Os05t0573700-01	chromosome05	28696551	-	Os05t0573700-01
Os04circ18484	HWI-ST620_0166:6:1105:20330:125068#0/2_A_GGGCGAGTGATGAAGGTAGGATGGAAGCGCCAAGCTGCTGTGAACAACTGAGGGAAAATTCAGATGGGCTCGGAGAGGTGATGTTTGGGAAGCAGAGGAC	chromosome04	35464324	35468990	plus	AG	GT	2	0	16	5	23	null	null	cds-3utr OR 3utr-intergenic	chromosome04	35464324	+	Os04t0684500-02	chromosome04	35468990	+	Os04t0684500-02
Os07circ08968	HWI-ST620_0166:6:1101:4742:187049#0/2_A_GCCTTGCGATGATGCTTCTACTTCACCTCTTGCTTCTTCCAGACAAGCTTGCCTCTATCTGAATCTTCTGGCCCTGAAAAGAAGCTAAAATTATTTTTCT	chromosome07	19945389	19946698	plus	AG	GT	1	0	11	11	23	null	null	cds-cds	chromosome07	19945389	+	Os07t0507700-01	chromosome07	19946698	+	Os07t0507700-01
Os01circ04572	HWI-ST620_0167:4:2107:7560:47363#0/1_A_GCGACAGGTGGAGGGAGAGGTAGTGGAGAGGCTTTTGCTGTGTGCGGATTTTTTATCTTCGTTGACACAATATAGTCAATGAGTACAGGACGATGGACAA	chromosome01	4518323	4519592	minus	AC	CT	10	12	0	1	23	null	PIF/Harbinger	cds-cds	chromosome01	4518323	-	Os01t0185200-03	null	null	null	null
Os04circ13410	HWI-ST620_0167:7:1103:14346:79631#0/1_A_GAGCCATTCCTTTGGGTTTATGCACGCGTCAAGAAGTTTCCGTTCTTCAGTTACAAAGCTCAACAGCATCGACAGATGAAACAAAACACCCGCATTGCAT	chromosome04	31464276	31464500	plus	AG	GT	15	8	0	0	23	null	null	cds-3utr	null	null	null	null	null	null	null	null
Os08circ07854	HWI-ST620_0171:5:2102:12832:97933#0/2_A_CTCTTCTGCATCATCATCACCACCATCTTCTCTTGCCCTCCTCCGGGAATTGCTGTCCAGCAGGTGCAGGATGAACACCATCAACACCGAGCAGGTGAAC	chromosome08	17818592	17819659	minus	AC	CT	0	1	14	8	23	null	null	3utr-3utr	chromosome08	17818592	-	Os08t0377400-01	null	null	null	null
Os09circ01198	HWI-ST620_0171:8:2206:19911:15223#0/1_A_GATGGTCATGCGGTAGAGATAATGCGGGTTGTTTATCTTCTCCACAACAGATTGATCAAGGATCGGTATAAGTGCCTGCAGAACCTTCGCAACATTGAAT	chromosome09	4376543	4376829	minus	AC	CT	19	4	0	0	23	null	null	cds-cds	chromosome09	4376543	-	Os09t0249700-01	chromosome09	4376829	-	Os09t0249700-01
Os03circ25781	HWI-ST620_0171:1:1202:16816:43943#0/2_A_GACTTGCGAGAGGCAGTTGATGTACTCTTCCTGCATGGATCATCTGATATGGTGATTGCAAAGCAAGCGATTATACCACAGATGTTTGTTTGGATGAGAA	chromosome03	31031049	31032902	minus	AC	CT	1	0	8	13	22	null	null	cds-intergenic	null	null	null	null	chromosome03	31032902	-	Os03t0737200-00
Os04circ18642	HWI-ST620_0171:6:1203:13051:77190#0/1_A_GACAAATTTGTCGGATTAGACAATGAGCCCTCAGGTGCCATCCATCTATACGTGCCAGTTTCAGCAGTCATTTCTCCCCCTTGAGATCGGAGCCGAGAGA	chromosome04	35592272	35594852	minus	AC	CT	0	0	13	9	22	null	null	5utr-cds	chromosome04	35592272	-	Os04t0686650-00	null	null	null	null
Os08circ02980	HWI-ST620_0166:6:2108:18476:110759#0/2_A_GGACAAAGACAGCTGTGCAGATCAGAAGTCATGCTCAAAAGTTCTTCACCAAGGATCAAGGAAGTGTTTGGCCTTCGTAGAGTTGAAGATAACGAAAGGA	chromosome08	3364757	3366029	plus	AG	GT	0	1	14	6	21	Tc1/Mariner	null	5utr-cds	chromosome08	3364757	+	Os08t0157600-01	chromosome08	3366029	+	Os08t0157600-01
Os01circ12685	HWI-ST620_0173:6:2305:7954:19780#0/1_A_GAGGTGGCGAGGGCGAAGCCGGCGACCAGATTCTTGATGGTGAAGAGGAACGGCACGCGCTCGCCTCCCGGCAGCTGCACGGTGACGGCGGCGTAGTCGA	chromosome01	18980294	18980863	plus	AG	GT	21	0	0	0	21	null	null	cds-cds	null	null	null	null	null	null	null	null
Os07circ18017	HWI-ST620_0171:7:1301:6493:81087#0/1_A_CGCGGGCTTGGGGCAGGGGACGGCCGGGAGGAAGGTGGGGGTGAGCGAGGTGGAGAAGAGGGTGGCAAAACCAAAACCCCTCGACCTGCCGCTCTCCCTG	chromosome07	26871981	26873535	minus	AC	CT	11	9	0	0	20	null	null	intergenic-intergenic	null	null	null	null	null	null	null	null
Os01circ14805	HWI-ST620_0166:6:2208:9447:104783#0/2_A_TGCCAAGAAAACTCTAAGGATAGGGAACTCACAGAGGATACACACACAAAGTCAAGCTGTGGTGAAAGTTCACTTCACTGGAGAACTAGTTGACGGTACG	chromosome01	23054942	23056878	plus	AG	GT	0	0	4	15	19	Mutator	null	cds-cds	chromosome01	23054942	+	Os01t0563000-04	chromosome01	23056878	+	Os01t0563000-04
Os03circ01134	HWI-ST620_0171:3:1303:8986:180654#0/1_A_GTGCAATGGTTTTATACTTTTTTATAGGCTTTTTTTTGGGGGAGGAAGAGGAGAAGAGGGTGTTGGTGCTCGTCGGGTGGCTGCTGTAGTAGTACGCGCC	chromosome03	1125724	1126182	plus	AG	GT	1	17	0	1	19	null	null	ncRNA-intergenic	null	null	null	null	null	null	null	null
Os07circ19573	HWI-ST620_0166:7:2305:10233:148880#0/2_A_GGAAATGGCTACCTGACATGAATGTTGTGGTTTATGTGGGAAATCGTGCTAGCAGAGAGGGAAAAAGATACAGATATTGAATTTGCTCAGGATGCTATTG	chromosome07	28494355	28495445	minus	AC	CT	0	0	16	3	19	null	null	intergenic-intergenic	null	null	null	null	null	null	null	null
Os09circ05552	HWI-ST620_0177:6:1305:3250:171908#0/1_A_TCACAGACAATGAACTCACAACCACGAACAACGAGAAGTCTGACTCCACCATTACTCTTTTTTTTTAAAGTCACAACCAAGAACAATGAATATTATCCAA	chromosome09	16418158	16418272	minus	AC	CT	3	0	13	3	19	null	null	intergenic-intergenic	null	null	null	null	null	null	null	null
Os02circ11223	HWI-ST620_0166:6:2203:7773:150085#0/2_A_CGCCGCCACCGATCCCAACGGAATCCTCAGGAACAAGAAGCGCGGTGGCGGCGCACCTGTCGCGGGAGCTCCCCTACGCCGTCTCGCCGGCGGACGTGGT	chromosome02	11762996	11763648	plus	AG	GT	0	0	8	10	18	null	Tc1/Mariner || PIF/Harbinger	cds-cds	chromosome02	11762996	+	Os02t0302200-01	chromosome02	11763648	+	Os02t0302200-01
Os01circ00309	HWI-ST620_0167:6:1305:7971:29392#0/1_A_CACGCCTCGCCGCCGATGAGGTCGCACGCCTCCTCGGGAAACACCGTGGTGGGCTCGTCGTAGGATAGGTAGACACTGTCGACTTCCTCCGCCGCCGCAC	chromosome01	168751	168909	minus	AC	CT	17	0	1	0	18	PIF/Harbinger	null	cds-cds	chromosome01	168751	-	Os01t0102900-01	chromosome01	168909	-	Os01t0102900-01
Os01circ20329	HWI-ST620_0166:6:2204:5027:41322#0/2_A_GTCACGCTACCGCTTCCTCCGCCGCCGCCGTTGGCTAGCGGGAGGCAGTCCGGGCTAAGCCTTTGGTACCTGTGGTGGTGTGCGTCTCCGACGGCGGCGG	chromosome01	29749336	29749956	minus	AC	CT	9	3	3	3	18	null	null	cds-cds	chromosome01	29749336	-	Os01t0680700-01	chromosome01	29749956	-	Os01t0680700-01
Os05circ17990	HWI-ST620_0166:7:2306:17999:164049#0/2_A_CAGGAATGTGGCTCTCGGATGTGACCAGATCCAAGTATATCGTCCGCGAGAAGAAGTCCACCAAGAAGATCCGGCGAGCAGTCGGCGGCGGCGACGAAGG	chromosome05	27794099	27794627	plus	AG	GT	3	1	10	3	17	null	null	cds-cds	chromosome05	27794099	+	Os05t0556600-01	chromosome05	27794627	+	Os05t0556600-01
Os01circ11062	HWI-ST620_0166:6:1208:5873:78694#0/2_A_CACCGCCACCACACCGCCCAGCGCCGCCGTCACCGGCGGGCCCAAGTACAAGTACAGCAATCCCAGCGCCACCCCAACCTCGCCGGAGATCTTGCGCATC	chromosome01	14493353	14494431	minus	AC	CT	0	0	17	0	17	PIF/Harbinger	PIF/Harbinger	cds-cds	chromosome01	14493353	-	Os01t0356400-01	chromosome01	14494431	-	Os01t0356400-01
Os02circ13699	HWI-ST620_0171:3:1101:8876:178164#0/1_A_TGGGCCTCAATTTCCTCGGTCAACTCAAAGGGCTCATCATCAACATGGTTTAGGTCAACGTTAAAAAGTACAATAGTTCCCTGGTTAATATCTTTCTCCG	chromosome02	19520657	19521458	minus	AC	CT	2	14	0	1	17	null	null	intergenic-intergenic	null	null	null	null	null	null	null	null
Os02circ24063	HWI-ST620_0166:6:2304:11401:194095#0/1_A_CTGAGCTAATGACCTCCATGCATGCAAGGAAAGCAACTACGGTTTTACCACAACCAACATCACCCTGCACCGCACAAGCCAGAATGCAAAAGCTTTGCCC	chromosome02	30303851	30307292	plus	AG	GT	0	1	11	5	17	null	null	intergenic-3utr	null	null	null	null	null	null	null	null
Os08circ15493	HWI-ST620_0171:7:1104:13009:194992#0/1_A_GTGAGGAACATCTGCGCGCCGACGTTGACGGGCTCGCCGGACCGCGCGCGCAGCGTCCCCCTGTTCTGGAGCATCTCCGCCATGCCCCATTCCACGGTGT	chromosome08	27568034	27568623	plus	AG	GT	14	3	0	0	17	null	null	intergenic-intergenic	null	null	null	null	null	null	null	null
Os01circ04227	HWI-ST620_0167:4:2308:6286:144448#0/2_A_GTGGCTATGTATCATCGTACAAAAGGCAGCTGTTCCTGCACTTCTATTACCTCCACCGACCACACCATTGGACGAACATTTGGTTGCGGGGCTCCCTCCT	chromosome01	4332220	4332890	minus	AC	CT	15	1	0	0	16	null	null	cds-cds	chromosome01	4332220	-	Os01t0182600-02	null	null	null	null
Os05circ02465	HWI-ST620_0166:6:2301:14859:91920#0/2_A_GCAGTGGCCTTTTGCTTTCAACTCAATCTCAAGAGTGTAATTAACTTGGAAATAAAGACAGGTGACTTATTGGATTCTACCTTTTCTTCCGCAGCTGTCT	chromosome05	2395454	2396306	plus	AG	GT	0	0	7	9	16	null	PIF/Harbinger	intergenic-intergenic	null	null	null	null	null	null	null	null
Os06circ09294	HWI-ST620_0167:5:2306:10831:33265#0/1_A_TAGCCATAGGTTCCTCATCTCTGGGCTTAAACACTGCAATATTCTTCTCTGGCAAGCAGTAACCATGATCAATTGGAACCAACTTGTAATTGCCACCTTC	chromosome06	13670699	13671163	minus	AC	CT	12	3	1	0	16	null	null	cds-cds OR intron-intergenic	chromosome06	13670699	-	Os06t0340600-02	null	null	null	null
Os07circ11576	HWI-ST620_0166:8:2305:8842:85823#0/2_A_CCTCTTTCATCAAGATTGAATAATATATGCTACTTTGAGAGCGCTAAAAAACCGTGTGTTGAAGTTTGTAAGAGGCACCATCACTATAGATGATGGCTTG	chromosome07	21393388	21393491	plus	AG	GT	0	0	16	0	16	null	null	intergenic-intergenic	null	null	null	null	null	null	null	null
Os08circ06706	HWI-ST620_0171:6:1204:15807:15740#0/1_A_CTCTTGGTATATTTACCACGGCCATGCAGAAACTTGAGAGACTTGTATAACCTTCTGAGACGTGCGGTACAGTATCTCCTCAATCTTAGCCTTGAAAAGA	chromosome08	14201164	14202781	minus	AC	CT	1	0	3	12	16	null	null	intergenic-cds	chromosome08	14201164	-	Os08t0323000-01	null	null	null	null
Os01circ29173	HWI-ST620_0171:7:1303:5436:123481#0/1_A_GCTAGTAGTAATGAATGGCCCTCCAGTAGTGCGACCGAAATTTGTTCCACCATGGTAGTCAGTAGAGTCTTTTGTTGTATTAATATGGTCTACAAATCCA	chromosome01	39726650	39727812	minus	AC	CT	1	14	0	0	15	null	null	intergenic-intergenic	null	null	null	null	null	null	null	null
Os02circ07060	HWI-ST620_0177:7:2106:2856:174321#0/1_A_GTCCGAGAACTGCTCGTCCCGAGGCACGTACACCGGCCCCCTCCTCTTCTCCGTCCGCGGATGCTCGAACATCTCGGGGACGTCGAAGCGGAGGACGTGG	chromosome02	5280634	5281011	minus	AC	CT	1	0	14	0	15	Tc1/Mariner	Tc1/Mariner	cds-cds	chromosome02	5280634	-	Os02t0194700-01	chromosome02	5281011	-	Os02t0194700-01
Os08circ01709	HWI-ST620_0167:7:2205:18995:130829#0/1_A_GCTGGGGGTCCATCTCTTCGCCTTTCATACCGTCTGCTTTCATATTTGGATGTCATAGTCCACCCAAAATATCAAGAATGATGATGATCCACATGATCCA	chromosome08	2177420	2177815	plus	AG	GT	12	3	0	0	15	null	null	intergenic-intergenic	null	null	null	null	null	null	null	null
Os11circ11826	HWI-ST620_0167:6:2101:7119:91465#0/1_A_TTGCTGAAAGTCGATGATTGTAGAGGATCACTGTTGATGTTGGAGCTCTTGCCATGGTAGTTCACCGCCGATGTCACCTGCTTCTTCAGCTTCTTCCCCA	chromosome11	31135331	31135593	minus	AC	CT	13	0	0	2	15	null	null	ncRNA-ncRNA OR intergenic-ncRNA	null	null	null	null	null	null	null	null
Os02circ30975	HWI-ST620_0166:6:1306:11934:122573#0/2_A_GGCGATGCTGATCAAGGCCAAGGACAAGGATTGGCCGCACACCTCCTTCGGCATCCTCAGCATAGGGCTTGTCAAGACTGGCGAGGATGTGGCACTGTCG	chromosome02	36444334	36445044	plus	AG	GT	2	1	11	0	14	null	Tc1/Mariner	cds-cds	chromosome02	36444334	+	Os02t0828200-01	null	null	null	null
Os03circ08779	HWI-ST620_0166:8:1108:11382:139018#0/1_A_GGCTATGATGTTAAGTTCACTTCTACTTTCAGCTTCACCTCTCCTTGCTCGACCTCCAACACATTAGACCTCCAACCTCTCCTTGCTCGACCTCCAACGT	chromosome03	8144210	8144946	minus	AC	CT	1	1	6	6	14	PIF/Harbinger	null	intergenic-intergenic	null	null	null	null	null	null	null	null
Os04circ19076	HWI-ST620_0171:6:1106:5852:102621#0/1_A_GGGCAGTGGCATCATTCTCGAGCTTTAGTGTGAGGAAAACTTTGACTATGGGGCTGGTGAGGTCGATCTTGAAAAGACTCCTTTGTGCTGAGCACCACCA	chromosome04	36034760	36035516	minus	AC	CT	1	0	4	9	14	null	null	cds-cds	chromosome04	36034760	-	Os04t0693000-01	chromosome04	36035516	-	Os04t0693000-01
Os05circ14548	HWI-ST620_0171:6:2302:17565:29489#0/1_A_GGTATATAACTTCTAATGATGAATTGAAGAGAAGGGTGGTGATTTAAAGNTTTCACTCGGTGAAGGTTGGCCATAGAAATTATGTAGAAACCTGCAGATT	chromosome05	24425227	24425390	plus	AG	GT	8	3	0	3	14	null	null	intergenic-intergenic	null	null	null	null	null	null	null	null
Os11circ01009	HWI-ST620_0171:5:1203:10256:155229#0/1_A_CTAGCTACAATTCTACTGGAAATGTATATATATGCTTCTCTCTTCTTAATTTAATTACCTCATCAAGCATGTTAATCAGCTTTCCTTTCTTCATCTGCAG	chromosome11	2824701	2825574	minus	AC	CT	1	2	6	5	14	null	null	5utr-cds	null	null	null	null	chromosome11	2825574	-	Os11t0158832-00
Os11circ04215	HWI-ST620_0166:8:2207:1194:136842#0/2_A_GGTCAATGCTACATGGTCATAGGGGAGAAAAGGAAAGCAATTCCTTACTTTCAGAAAGGCAATTCCTATATTACATGAGGTTGTGCGGATCGCGCCGAAT	chromosome11	9210417	9213602	minus	AC	CT	0	0	10	4	14	null	null	cds-cds	chromosome11	9210417	-	Os11t0266800-01	chromosome11	9213602	-	Os11t0266800-01
Os02circ19087	HWI-ST620_0167:4:1306:4531:182131#0/1_A_GCGTTTGTTTGTGTTTGTGTGTGATGGATTGATTGCTCGGTGTGTGTGTGTGCCACACATTCTTGATCTCGTTGTCCGTCCTCCCCGGCAGCCTCGCTGC	chromosome02	25735357	25735891	plus	AG	GT	13	0	0	0	13	null	null	intergenic-intergenic	null	null	null	null	null	null	null	null
Os04circ14288	HWI-ST620_0167:4:1106:13045:5589#0/1_A_CGCTGGATTTTTGGAGATTTTCGGAGAGGGGGATTTGGTTTTGGGGAGAGGAGGAGAACGAGACCTTCCCTATCTTTTCTACCAGCTCTTGGGGAACTTG	chromosome04	32170313	32173725	minus	AC	CT	9	4	0	0	13	null	null	5utr-cds OR intergenic-5utr	null	null	null	null	null	null	null	null
Os08circ01719	HWI-ST620_0167:5:2304:14002:85164#0/1_A_CTGCTTTCATATTTGGATGTCCTCCGCTCTTTTGGTTGGTAGCAGGGTAACACAAGAAAAATATCACTAGATATTTGAGACAGTAACATTCTTAGATAGA	chromosome08	2177327	2177835	plus	AG	GT	9	4	0	0	13	null	null	intergenic-intergenic	null	null	null	null	null	null	null	null
Os08circ00041	HWI-ST620_0166:8:2103:9703:144788#0/1_A_CAGCAATTAAATGTGTGAATATCAGGTCTGGCCGGCAGCATCTGAGGAACATGTCCTGCGGTGCTTGCCAGTTGAATTGGAGCTTTCTTTGCCTGAGAGG	chromosome08	42389	44716	plus	AG	GT	1	0	4	8	13	null	null	cds-intergenic OR 3utr-intergenic OR intergenic-cds	chromosome08	42389	+	Os08t0100500-01	null	null	null	null
Os11circ09489	HWI-ST620_0171:7:1302:9809:18342#0/1_A_CGATGAATACTGGACCAAGCTGAGGCGTGCTCGTAGTGGTTGAGGGGAGGAGAGGGACGGGGTGGCGCGGCTTGTTCCGCCGCCCGCGTCGCCCCCGGGC	chromosome11	29924072	29924709	minus	AC	CT	6	5	0	2	13	self-complementation	self-complementation	intron-intron	null	null	null	null	null	null	null	null
Os12circ04001	HWI-ST620_0173:6:1205:17865:195573#0/2_A_GGGTGCCCTGCCTCGAGTTCAGCAAGGAGAGAGCTTGGTGAGCTGCAGAGATGGCCCCCTCCGTGATGGCGTCGTCGGCCACCACCGTCGCTCCCTTCCA	chromosome12	10088515	10088920	minus	AC	CT	13	0	0	0	13	null	null	5utr-cds	null	null	null	null	null	null	null	null
Os12circ01939	HWI-ST620_0171:4:1203:3220:144541#0/2_A_TATCCCTCTTTGAAGAATATACTGGTTGTATGTCCTTAATGGCCTTGGTGATACACCTCTTACAGGTGTATGCAGTTGGGCAGTGTTGTGATGACACTGA	chromosome12	5024608	5026284	plus	AG	GT	6	7	0	0	13	self-complementation	self-complementation	3utr-3utr	null	null	null	null	null	null	null	null
Os08circ06323	HWI-ST620_0166:6:1303:12551:165961#0/2_A_GTGGCTTCAAGCAATGAGAGATTATCTGGTTCTGTTGGTTTTGTTTTGTCAACATCCCGAGCAATATCAGAGACACTTATCATGGGTAACCGTGATGTTA	chromosome08	12505841	12507245	plus	AG	GT	0	0	8	4	12	null	null	cds-cds	chromosome08	12505841	+	Os08t0301500-01	null	null	null	null
Os01circ26863	HWI-ST620_0177:8:2202:10482:158466#0/1_A_CGGCTCGTACACGTTGTCGCTCCAGGGGTTGGCAGCAGCGTTATCCCCAATCAGCAAAGAATAACACTGTGAAGAATTATAAGCATTTTCTGCGCCTGAG	chromosome01	37236758	37237762	plus	AG	GT	7	5	0	0	12	null	null	intergenic-intergenic	null	null	null	null	null	null	null	null
Os02circ12044	HWI-ST620_0166:7:1107:6304:2955#0/2_A_GTGGAGGAGAACCCCAGAACCAAGGCCTGGCGGCAGGCTTGTTACCTGTATTTGCAGGTAGTGTATGGCTGTTTTGTGTTGCACCTTGAAGTATGCAGCT	chromosome02	13498134	13499988	minus	AC	CT	1	0	8	3	12	Tc1/Mariner	null	intergenic-intergenic	null	null	null	null	null	null	null	null
Os03circ29897	HWI-ST620_0173:6:2104:14940:22556#0/2_A_GCATCTTGATCTGGACAGGGAAAGCCAAATCAATGTCAAATACTGGGAGGTCACCGAAGAGCAGATCGTGGAGTACATGGCTAAGAAGGCGCAGAAGAAG	chromosome03	34262782	34265623	plus	AG	GT	2	9	0	1	12	Mutator	null	cds-cds	null	null	null	null	chromosome03	34265623	+	Os03t0800100-01
Os03circ06526	HWI-ST620_0171:3:2203:17454:143014#0/1_A_GCTTCTTCTTGTAATCTTCTTCTTCTTCTTCTTCGTACCTCCCACCATGGCCTCCACCACTTGAAGCACCATACCCATATCCACCACTAGGCTTCTTGTT	chromosome03	5823335	5823811	minus	AC	CT	5	7	0	0	12	null	null	cds-cds	null	null	null	null	null	null	null	null
Os03circ11285	HWI-ST620_0167:6:2204:6642:149553#0/2_A_CTTTTTTCTTGCTGTTGTGCCTGACTAAGGTTAGCATTGAACCGGTAGCCTGTTTTCAGTTACACGCCTATCAAAGTCATGAGTCCTAAAATTAGTAGTA	chromosome03	9808242	9808657	minus	AC	CT	11	1	0	0	12	null	null	ncRNA-ncRNA OR intron-intron	null	null	null	null	null	null	null	null
Os07circ12794	HWI-ST620_0167:4:1302:6301:67980#0/1_A_CGCCGCCTTCTTCCCGCCGCCGAACCCGAACCTCGGTGTAGGGCTGGAACGGGGTGGACTTCACCTCGCCGGTCTCGAACCGGGTGCCGATGATCTCGCC	chromosome07	22977650	22977944	minus	AC	CT	10	2	0	0	12	hAT	null	cds-cds	null	null	null	null	null	null	null	null
Os09circ03412	HWI-ST620_0166:6:1307:11036:50132#0/1_A_GGCTCGGGAAACATGGATCACCCATCCAATTCTTTTTTATCCCGTACTCAACTTTAATAGCCCATATAGCATCAACTCTCAGAAGATCAAAAAGATTGCC	chromosome09	12264435	12266519	minus	AC	CT	1	0	10	1	12	null	null	intergenic-cds	chromosome09	12264435	-	Os09t0358400-00	null	null	null	null
Os04circ05900	HWI-ST620_0166:6:2303:13003:38294#0/2_A_GGCGGCGATTATGGACGGTAATGGCGTTGGTTTAAGTGGTGAGGAGTTGCCATCGGCGAAAGGAAAGGGCAAGGAAAAAGCTCTCTGAATGTCACATCGA	chromosome04	22247037	22249440	plus	AG	GT	5	0	6	0	11	null	null	intergenic-intergenic	null	null	null	null	null	null	null	null
Os01circ11630	HWI-ST620_0171:4:2204:19568:28356#0/1_A_CCGCGGGTGTCGAAGCGGGCGGGGACGGGGAAGTGGAGCACGGTGTTCCACGCGGGGTTGCTGCGTAACCGTACTGCTGCTGATGCGGTGGGTACCCTCC	chromosome01	15392386	15392897	plus	AG	GT	0	11	0	0	11	null	null	cds-cds	null	null	null	null	null	null	null	null
Os01circ24342	HWI-ST620_0171:6:2103:2591:18441#0/1_A_TGCCTCTCCCTGCCGTCGCTGATGCTACCTGCTCCTTGTACCCTTTCCTCTTTGAATAAATGTCTTCTTGCCTTGGCAAGAGCAGCTTCTGTTCTGGTAG	chromosome01	34200705	34202050	plus	AG	GT	10	0	0	1	11	null	null	cds-cds	null	null	null	null	chromosome01	34202050	+	Os01t0769900-01
Os02circ05879	HWI-ST620_0166:6:2304:11442:191682#0/2_A_CAACGCAGGTGGGTAGTGCTTCTTATACAACTGCGCAACTTCTGAGGATCTCGAACCACAAGCCTAAGGAAGTCTTCAACTGTAGAAATTCCAGCTTTGT	chromosome02	4296425	4296585	minus	AC	CT	0	0	11	0	11	null	null	cds-cds	chromosome02	4296425	-	Os02t0177800-02	chromosome02	4296585	-	Os02t0177800-02
Os03circ26652	HWI-ST620_0166:8:2301:8987:61976#0/2_A_TTTGGACGGGGATGGGCACCAGCAAATGGCAAAGATCTTGATGCAGTCCTTAAAGCAACACCGATTCTTCCAGAAAAGGAAGCGAGAATCATAATTGTCC	chromosome03	31701426	31703971	minus	AC	CT	0	0	6	5	11	null	null	cds-3utr	null	null	null	null	chromosome03	31703971	-	Os03t0749800-02
Os06circ10271	HWI-ST620_0171:7:1301:11355:39688#0/1_A_GGCTTCCATCATTTTTTTGGTCTGTGTGCTCTATATTTTCTATCTTTTACAATATTCGTGATCGGATCTCGTTCATGAACAACTATACTTGACTGTGCCC	chromosome06	17674307	17674634	minus	AC	CT	5	6	0	0	11	null	null	intergenic-intergenic	null	null	null	null	null	null	null	null
Os07circ01642	HWI-ST620_0173:6:2304:10579:6416#0/1_A_GTGGTGGAGGGAGAGGGTGATGGGGCGAGGAACTCCTCGGGGGAGCCGAACTCGGTGATGGTCTTCTTGGTGGTGGGGTTGATTATGACGGAGACGTTGC	chromosome07	2169938	2170473	plus	AG	GT	5	6	0	0	11	null	null	intergenic-intergenic	null	null	null	null	null	null	null	null
Os08circ16093	HWI-ST620_0167:4:2308:11972:100009#0/1_A_GTTGGGGTCCAGCTGCGGCGGCACGAACCCCGCGGGGGCTGGCTTCTTGCCGATGCTGCGGAAGTTCTGGCCGACGCCCTGCCTGCCGGCGTTGACCTTC	chromosome08	28171618	28172010	minus	AC	CT	10	1	0	0	11	PIF/Harbinger	null	cds-cds	null	null	null	null	null	null	null	null
Os10circ01611	HWI-ST620_0173:6:2306:19469:142900#0/2_A_CTATTCGGGAAGCAGTTATCAAAGTCAAGGACCAGAAGCATTTGCCCTGTTGTCCGAGGAGGGTATTGCTAAAGGTGTTAGGAGGATCACAGCTGTTACT	chromosome10	5450870	5451646	plus	AG	GT	6	5	0	0	11	null	PIF/Harbinger	cds-cds	null	null	null	null	chromosome10	5451646	+	Os10t0182000-01
Os11circ09490	HWI-ST620_0173:6:1107:6504:6693#0/2_A_CTGCCCGGGGGCGACGCGGGCGGCGGAACAAGCCGCGCCACCCCGTCCCTCTCCTCCCCTCAACCACTGCATCGACCACTACGAGCACGCCTCAGCTTGG	chromosome11	29924060	29924709	minus	AC	CT	7	2	0	2	11	self-complementation	self-complementation	intron-intron	null	null	null	null	null	null	null	null
Os11circ04216	HWI-ST620_0166:6:2204:5433:68772#0/1_A_GTATGAATTTGACAAATTCGGCGCGATCCGCACAACCTCATGTAATATAGGAATTGCATCATTATGAACAGCAACATCTTCAATCATCAGGTAAAACTTT	chromosome11	9211755	9213602	minus	AC	CT	0	0	6	5	11	null	null	cds-cds	chromosome11	9211755	-	Os11t0266800-01	chromosome11	9213602	-	Os11t0266800-01
Os12circ03152	HWI-ST620_0171:6:1204:7318:117970#0/1_A_TCTATGCACAGCTCTTGTATGAGAAATTTAACCCCAGAACTGTCTTCCTCTCGCTACCACTTACCCCCCATGGCTTCCTTCCTTGCTGCTAGCCTGCTCA	chromosome12	7337857	7339215	minus	AC	CT	0	0	4	7	11	null	null	3utr-3utr	null	null	null	null	chromosome12	7339215	-	Os12t0233800-02
Os03circ25980	HWI-ST620_0166:6:1307:4441:18864#0/2_A_GGCTACGAACTTGTCTCTGGTGGGACTGACAACCATTTAGTGTTGGTAAATCTCAAGAGCAAGATGGAGAAAAGTGCCGTTCTTTTTAGGCCAAAGTTGA	chromosome03	31112702	31113747	plus	AG	GT	0	0	7	3	10	null	null	cds-cds	chromosome03	31112702	+	Os03t0738400-01	chromosome03	31113747	+	Os03t0738400-01
Os06circ16335	HWI-ST620_0166:6:1302:6741:181436#0/2_A_TGTACACGATGGAGAATCACAATAGTGTGCTTGGGATAAGAGAATAGTCAGAGTGATTCAAGCATGGCTGCGAGTGACCTCGTTACTGCTGCACGCCATC	chromosome06	28627226	28627802	plus	AG	GT	0	0	9	1	10	null	null	cds-cds	chromosome06	28627226	+	Os06t0670000-01	chromosome06	28627802	+	Os06t0670000-01
Os05circ20545	HWI-ST620_0166:6:2206:14879:167899#0/2_A_CTGAGAAAGACTTCCCCTCTAATGAACTATGTCCAGCTTGCGAGACAAGGCTCAAGTGGAGCAATTGCTTCGTTACATCGTGGAAGAAGTACCAGAAGAT	chromosome05	29638024	29638682	plus	AG	GT	0	0	5	5	10	null	null	cds-cds	chromosome05	29638024	+	Os05t0592500-01	chromosome05	29638682	+	Os05t0592500-01
Os01circ20310	HWI-ST620_0177:6:1302:13399:74312#0/1_A_GTGCGCCTTGTCCGGCGACCGCTTGTACCCGCCGCCTGATCGCTCCTCCACGGCGGACCTTCTTCACACATTTCTTCTCTCGCACCTCATACCGTCCTCT	chromosome01	29747721	29748225	minus	AC	CT	0	0	7	3	10	null	null	cds-cds OR intergenic-3utr	chromosome01	29747721	-	Os01t0680700-01	chromosome01	29748225	-	Os01t0680700-01
Os01circ30957	HWI-ST620_0171:6:1102:12372:192437#0/1_A_CCCAAAAATCGACGTCCATTGCTGCTTTTGTTATTTTCTTCCCGAGCTTTTAGAGATTTGGCCTTTGCAGGAGTCTCTTCTTCATCAGAACTCTCACCTT	chromosome01	41350279	41352999	minus	AC	CT	2	0	2	6	10	null	null	5utr-cds	chromosome01	41350279	-	Os01t0909500-01	chromosome01	41352999	-	Os01t0909500-03
Os01circ04894	HWI-ST620_0177:6:1202:12467:139526#0/2_A_GCAACAAAAGCTTGACAGGAGGTCTGCCGGCTTGGAGGAACTGATAATGGGCTGCACGTCTTCGAGCACAAAAGGAGTTGGTATAAGTGGTGATCAGGTA	chromosome01	4880888	4882265	minus	AC	CT	1	0	6	3	10	null	null	cds-cds OR intergenic-3utr	chromosome01	4880888	-	Os01t0191300-01	chromosome01	4882265	-	Os01t0191300-03
Os02circ12308	HWI-ST620_0171:1:1302:6175:53163#0/2_A_GTTCAAGCTCTTCCACAGTACAGCGATCAAATTGAGAAGCTTTCTCTTCATGTTGAGGAATTCCCTAGAGTGCACTACCGTGTCGCCAAGACAATTGATG	chromosome02	15698799	15700504	minus	AC	CT	0	0	2	8	10	null	null	cds-cds	chromosome02	15698799	-	Os02t0452500-01	chromosome02	15700504	-	Os02t0452500-01
Os03circ01242	HWI-ST620_0167:5:1207:15672:169244#0/1_A_GGCGGTGGGGGATGGGACGCCATGCAGGGACAAGGAGGTGGTGGCCATCAGTAAGGTGATTCATGGGTGCCAGAGAAACAGACTACAAGAGCACCTTTTC	chromosome03	1231510	1233384	plus	AG	GT	9	1	0	0	10	null	Mutator	intergenic-intergenic	null	null	null	null	null	null	null	null
Os05circ13568	HWI-ST620_0171:8:1106:11445:5219#0/1_A_GTCTCAGCAACATGGATGCAGTTATACTGTTCCAACTTGCCACTAGGGATCGCATATCTAGCTTTCTCAGCAATCTCAAGGGCCTTCATCTTGGGTTTAA	chromosome05	23846628	23849385	minus	AC	CT	1	8	0	1	10	null	null	cds-cds	chromosome05	23846628	-	Os05t0482700-01	null	null	null	null
Os05circ05275	HWI-ST620_0171:1:1203:1560:53084#0/1_A_GTCATTGGGCCAACCAACCAAATTACGCTGTCTTTGACTGTTCCACGAAACCTGTAATTGTCAGGAAAGCCTTGCAACCGAGCACTTTCACGAATAGTAA	chromosome05	7664920	7666426	minus	AC	CT	0	0	2	8	10	null	null	cds-cds	chromosome05	7664920	-	Os05t0224800-01	chromosome05	7666426	-	Os05t0224800-01
Os07circ12965	HWI-ST620_0167:6:2201:17959:97401#0/2_A_GCAGGCGTTCCTCCCCATGCTCTGCCGCTTCAAGTTCATCCTCTTCTTCTTCTTCGTGTCCATCGTGACCGTCGACATCCCCAAGGCGTACGCGGCGTTC	chromosome07	23013737	23014102	plus	AG	GT	9	0	1	0	10	null	null	intergenic-intergenic	null	null	null	null	null	null	null	null
Os07circ17887	HWI-ST620_0167:6:1206:7612:128800#0/2_A_GGAGGAGGGTGGCGCGGAGTCCGAGGGGGAGTTCGCCGAGGACCTCGCCTCGCCATGGCGGGAACCATCTTCTCCACCTCGCTCACCCCCACCTTCCTCC	chromosome07	26871959	26872206	minus	AC	CT	10	0	0	0	10	null	null	cds-intergenic	null	null	null	null	null	null	null	null
Os08circ05862	HWI-ST620_0166:6:2103:17876:145758#0/1_A_CCAGGCATTGCACCAAGCAAACAGAATACTATTGCTTATTCTTGATTTCTGTCACCCTTTGGCATAAGCAGCTACAAAAGGGACTATCTTGCATCCTAGC	chromosome08	10570911	10571921	plus	AG	GT	0	0	10	0	10	null	null	5utr-cds	chromosome08	10570911	+	Os08t0274700-01	chromosome08	10571921	+	Os08t0274700-01
Os08circ12659	HWI-ST620_0167:7:2201:7689:97479#0/1_A_GTACCGCTTCCAGGCGTGCTTCACGATCTCGGCGCTGTCGATGTACGGCGGCACGACGACGGAGCCGAGCTTCACCGGGTAGCCGATGTCCTTGAGCACC	chromosome08	24916497	24916801	plus	AG	GT	9	0	1	0	10	Tc1/Mariner	Tc1/Mariner	intergenic-intergenic	null	null	null	null	null	null	null	null
Os08circ12823	HWI-ST620_0173:6:1202:13782:97991#0/1_A_GAGGGGTCCTGGCGGAGCTTGTAGTCGAGGGCGGTGCGGAGGCCGTAGAGGAGCTGGATGGATGGGGTGTAGGGCCAGTAGGTGCCCATCTTGTAGAACT	chromosome08	24917029	24917534	plus	AG	GT	10	0	0	0	10	Tc1/Mariner	hAT	intergenic-intergenic	null	null	null	null	null	null	null	null
Os08circ15483	HWI-ST620_0171:4:2201:8758:107327#0/2_A_CGGCGGTGTGGAAGGACCCGGAACACTTCATCCCGGCGAGACGGCGTCGGACTTCCTCGAGTACATGCTCAAGCTGGAGAAGGAAGGCGGCGACGGGAAG	chromosome08	27567759	27568296	minus	AC	CT	5	4	1	0	10	hAT	null	cds-cds	null	null	null	null	null	null	null	null
Os09circ05544	HWI-ST620_0166:8:1202:1549:15351#0/2_A_GTTGTGAGTTCATTGTCTGTGATGTTGATTCGGGTTCTTGGATAATATTCATTGTTCTTGGTTGTGAAAAAAAAAAGGTGGAGTCAGACTTCTCGTTGTT	chromosome09	16418165	16418268	plus	AG	GT	0	0	10	0	10	null	null	intergenic-intergenic	null	null	null	null	null	null	null	null
Os12circ04701	HWI-ST620_0166:8:2205:16022:101442#0/1_A_TGATGCCCTCAATTGGCCACACCTGCATGCACTTGATCCTTCCGCCGGCAAGGCACCCACTTGGATCGAAGCAGGTACTCGATCTGCTTCAAAAGATCCT	chromosome12	11270427	11273353	plus	AG	GT	7	2	1	0	10	null	PIF/Harbinger	ncRNA-cds-acrossGene	chromosome12	11270427	+	Os12t0291100-01	chromosome12	11273353	+	Os12t0291200-00
Os12circ02548	HWI-ST620_0167:5:2105:4924:181621#0/1_A_GGTAATAAATCTCATCAAGTGTTCTGTTGTTGCTAGGTTTATATCACTGAAATAGTACTCCACAAAAGCATGCAGCTTGTTGGCAAACAGCATATCTAGC	chromosome12	6808928	6811419	minus	AC	CT	6	3	1	0	10	null	null	intergenic-cds	null	null	null	null	null	null	null	null
Os01circ17368	HWI-ST620_0211:2:2108:10521:3109#0/2_A_GGTGCTTTTATACGCTCATAAACCTCAGGAGAGTGCTCTTCCTCCCAATTTTCAACGAGACTCTCAAGAATGTATGGAGCATCATGCATGTCTTGTGAATATTCTCCTAACATCCATATAAGAGCTGCTTTGCCTTTTGGCTCCTGAATA	chromosome01	26630479	26631305	plus	AG	GT	0	0	0	9	9	null	null	intergenic-intergenic	null	null	null	null	null	null	null	null
Os07circ20289	HWI-ST620_0166:6:2207:17185:94817#0/1_A_CTGTCAGCCTCAAATCATAATTTCCACCATGGCCAACCGTAAAATGAGTAGTATAAATAGGTACTGAAGGAGACATGAGGAACCAACGGAGGGCGGCCAT	chromosome07	29086249	29086899	plus	AG	GT	0	0	8	1	9	null	null	cds-cds	chromosome07	29086249	+	Os07t0672500-02	chromosome07	29086899	+	Os07t0672500-02
Os01circ12433	HWI-ST620_0166:8:2302:3693:57782#0/2_A_GCGTCGACTCCTTCGCCTTCAAGGCCGGCAGGAGGCTTAGCTTCGACGAGATTCAGAGTAAAACGTACATGGAGGGGAAGGGAACCGGCACGGCGAACCA	chromosome01	18980479	18980598	plus	AG	GT	0	0	7	2	9	null	null	cds-cds	null	null	null	null	null	null	null	null
Os01circ14411	HWI-ST620_0177:7:2207:17250:199110#0/2_A_GGTTCAAGGCTTGTAGGTTCCAGCTGCATGGCAATTGCTCTTTGGTGTTCCTCTACCTGTTATTTCCTGCTATTTGCATTATGGGTTACTGCATGCTAGA	chromosome01	22362598	22363614	minus	AC	CT	0	0	8	1	9	null	null	intergenic-intergenic	null	null	null	null	null	null	null	null
Os02circ01495	HWI-ST620_0171:7:1103:20358:156259#0/1_A_GTGTCATCCAGCGGGTCGAAGTCGAACCTCTCCCCGGGCTGCTTGAAGTCGTTCTGCTTGTGTATCGTCGCCTTCTGCCTCCTCCCCACCACGGGGCGCG	chromosome02	825896	826354	minus	AC	CT	4	4	0	1	9	Tc1/Mariner	null	cds-cds OR 5utr-intergenic	null	null	null	null	null	null	null	null
Os02circ09512	HWI-ST620_0166:7:1308:6685:79115#0/2_A_CACAAACATGTGCGAATCCCCAGTTGTTTACTGCACAAATTCACCCCAACAAAACCATGTTTAACCTTGTCAGGAAGGCTTACATTCAAGCCAAAAATGT	chromosome02	8555801	8560015	plus	AG	GT	1	0	5	3	9	null	hAT	ncRNA-ncRNA	chromosome02	8555801	+	Os02t0250700-01	chromosome02	8560015	+	Os02t0250700-01
Os03circ12568	HWI-ST620_0167:5:2303:1254:48986#0/2_A_TGATGAATTGGAAGCGACTAAGGAGAGGGCACAGACGAGGANTACGAAGAGGGTGATGAGGACGAAGAGGAGGATGAGACCCCGCGGCCGAGGCAGCCTG	chromosome03	10699870	10700351	plus	AG	GT	9	0	0	0	9	null	null	cds-cds	null	null	null	null	null	null	null	null
Os03circ25779	HWI-ST620_0171:6:2204:1522:98573#0/2_A_GTGATTGCAAAGCAAGCGATTATAGATCTGGATTAGAGATGATGATGTCTAAGTTATCCCAACTGCAGAAGTTTGCTGTGCAGTTGGCAGGAATTTCCAG	chromosome03	31031049	31032278	minus	AC	CT	1	0	4	4	9	null	null	intergenic-intergenic	null	null	null	null	null	null	null	null
Os03circ05988	HWI-ST620_0166:6:1106:11880:199384#0/2_A_CTGGGAATGGTCAAAGGGAAAAGAAGGAAATATTAGGTCATTGCTTTCTACACTACAATATGAACAAAACATAACACCAATAATGCAAAGAACAATGTAT	chromosome03	5211436	5212906	plus	AG	GT	0	0	6	3	9	null	Tc1/Mariner	cds-cds	chromosome03	5211436	+	Os03t0198300-01	chromosome03	5212906	+	Os03t0198300-01
Os03circ10222	HWI-ST620_0167:4:2102:1349:9862#0/2_A_TGGAAAGTGGAACCAGTCCATGAGTTGTCAGCCATCATCCTNCGATGGGTGCCGCTCACTGTGAAAATGCACATTTTACATATGACATCACCTCCAAGTT	chromosome03	9270461	9271172	plus	AG	GT	9	0	0	0	9	null	null	cds-cds	chromosome03	9270461	+	Os03t0274000-01	null	null	null	null
Os04circ05898	HWI-ST620_0166:6:2106:6222:2556#0/2_A_GACGATCACTGGGATCGGCTTCAGAGGGCTCAGCGCCTGCAAACATCCAATGAAGCCATGAGCCAATCACACATCAGGTGAGGAGTTGCCATCGGCGAAA	chromosome04	22247037	22248743	plus	AG	GT	2	1	2	4	9	null	null	intergenic-intergenic	null	null	null	null	null	null	null	null
Os05circ20695	HWI-ST620_0171:8:1301:17693:183068#0/1_A_CTGCTGCCTTCTTCTCCTTCTCCTTTTCCTTCTTCTTCTTCTTCTTCTTGGCTGCAGCAGATTCCACTTGCAACTGAGATTCCTGATCCACTAACACATA	chromosome05	29648804	29649415	minus	AC	CT	3	6	0	0	9	null	null	cds-cds	null	null	null	null	null	null	null	null
Os05circ04950	HWI-ST620_0167:7:1101:14899:78157#0/1_A_TTTGTTTCCCATAGTCATGTTGTTCCCAATTTTGTTTGTTCTTGTCTTCAACACATTGCTTGGTTTTTGGTTGCAAATCCTTGTTCTGAACATGGATATT	chromosome05	6359346	6360379	minus	AC	CT	8	1	0	0	9	null	null	3utr-intergenic	null	null	null	null	null	null	null	null
Os07circ08292	HWI-ST620_0171:5:2104:16479:184613#0/2_A_GTTCCTGGTCATGAACATCCTATTGAACATCAGAATCCTGCAGATGCTGTTTGGAGGATAAAGCTTTGTGTTGGGTTCTGCAAGTCGTGTAATTCTCAAC	chromosome07	18408486	18410888	minus	AC	CT	0	0	7	2	9	null	Tc1/Mariner	cds-cds	chromosome07	18408486	-	Os07t0484300-01	chromosome07	18410888	-	Os07t0484300-01
Os08circ07766	HWI-ST620_0167:4:1208:13405:177756#0/1_A_GTGCAGTCAAAACCAGGTCAACAGTCTGACTCTTAAGGGCATCAAAGACCTCTGCTGGTGATTTCTTCAGGAATGTCAGAATATCCGCTGGATAATAACT	chromosome08	17055119	17056368	plus	AG	GT	8	0	0	1	9	null	null	intergenic-intergenic	null	null	null	null	null	null	null	null
Os08circ15730	HWI-ST620_0171:2:2302:14902:53349#0/2_A_CCGACTGGAAGGCTCACTCCAAGACCTGCGGCACCCGCGAGTACCGCTGCGACTGCGGCACCCTCTTCTCCAGGTCGTGCAAATCGAAGAGGATTGGAAG	chromosome08	27825965	27826793	minus	AC	CT	0	0	7	2	9	null	null	5utr-cds	chromosome08	27825965	-	Os08t0554400-02	chromosome08	27826793	-	Os08t0554400-02
Os09circ07609	HWI-ST620_0171:7:1202:8443:4913#0/1_A_GCTTGGAGCTTGAGGGTGGGTCTCGCTGCGATCGAGTGGTGGTGAGGATGTAGTAGGCGACGATGTGGCCGAGGGAGCCCCAGGCGAGGACGTCGACGAG	chromosome09	19175748	19176187	minus	AC	CT	0	9	0	0	9	null	null	intergenic-intergenic	null	null	null	null	null	null	null	null
Os12circ11366	HWI-ST620_0166:7:1202:13920:190701#0/1_A_CCATTGGTACCATTTGCCGTAGGTTCTGACAGATCATAGAAGTGTATTTCTAGAGGCATCTGGGAATCATGTTGATTAAAGCCACTGAACTGGGGGGCAA	chromosome12	26606168	26606715	plus	AG	GT	1	0	5	2	8	null	null	cds-cds	chromosome12	26606168	+	Os12t0621000-00	chromosome12	26606715	+	Os12t0621000-00
Os01circ14830	HWI-ST620_0211:2:1203:19670:50005#0/2_A_TCATCTACCACGAACTCGAACGGTTCATCGTCGCCGTAACCTCTACGATCAAAAACAGTTCCATCTTGAAGTTTGCCGAGCAACCGCACTCGCTGTAATAGCACGATGCTTGCATGTAGCACCCTAGCTGGATTGCGCACTTAGCCGCTT	chromosome01	23062303	23064002	plus	AG	GT	0	0	0	8	8	Tc1/Mariner	null	cds-intron OR intergenic-3utr	chromosome01	23062303	+	Os01t0563000-04	chromosome01	23064002	+	Os01t0563000-04
Os07circ08124	HWI-ST620_0166:6:1204:14306:103397#0/2_A_CTCCGGACCAGATGGACGGAACGTCTGGCATGCAGCTGTTTCTTTTCCTCAAGGCAAGCCTAGCGGAAAGGCCAGAGTCAGTATCTTCGTCCAATCGCTA	chromosome07	18279887	18280803	plus	AG	GT	1	0	7	0	8	null	null	intergenic-intergenic	null	null	null	null	null	null	null	null
Os01circ03506	HWI-ST620_0166:6:2306:21145:173691#0/1_A_CCCAAGGGCGCGCACAAGGCCACCATCGTCTGGCTCCACGGCCTCGGGGACAACGGAGCCAGAGTTGGGTGGTGGAGCGAGCGTGGCCGCGAGGGGACGC	chromosome01	3848155	3848551	minus	AC	CT	0	1	7	0	8	null	null	cds-cds	chromosome01	3848155	-	Os01t0175000-01	chromosome01	3848551	-	Os01t0175000-01
Os01circ31637	HWI-ST620_0167:5:1306:2628:65921#0/2_A_GATCGACGCCATGCTCCACCAGACTGGAGGTCAAGGGACAGGATGGGAACGAGGGATTCTTCCGCATCAAGAGATCTACGCAGCTGAAGAAGCTGATGAA	chromosome01	41793119	41794643	minus	AC	CT	6	2	0	0	8	null	null	cds-cds-acrossGene OR 3utr-intergenic-acrossGene	chromosome01	41793119	-	Os01t0918200-01	chromosome01	41794643	-	Os01t0918300-01
Os02circ15159	HWI-ST620_0167:4:1105:18230:134763#0/2_A_CAACTCCAGTACCAGTAACGGTAGGAGCAGCAGTGGCAAGTGCTACAGCAATTGAGGAAGCTGGTGGGCCGAAAATTCCAATGAAATATGGACGAGTTGA	chromosome02	21695930	21698210	minus	AC	CT	8	0	0	0	8	null	null	cds-cds	null	null	null	null	null	null	null	null
Os02circ15214	HWI-ST620_0167:5:2307:9138:97839#0/1_A_GTGGTCTTGAGGATCTCCCTGATGTCCTTGAAGTAACTGTTATCAAACTTCAACCATTCAACTGTCCATGATTGCCCTCCAGGTTCACCAGGCCCATCCT	chromosome02	21696912	21698656	minus	AC	CT	6	2	0	0	8	null	null	intergenic-cds	chromosome02	21696912	-	Os02t0553200-01	null	null	null	null
Os02circ19718	HWI-ST620_0173:6:1305:11459:186861#0/2_A_GAAACCTTTTCGTGTCCCATGGCCATGTTGTTGTTGTTATTAGATCCAAGGAGATTCTCAAGCTGCGCGACCGCCTCAACAAGATCTACCAGAAGCACAC	chromosome02	26288027	26288357	plus	AG	GT	7	1	0	0	8	null	null	cds-3utr	null	null	null	null	null	null	null	null
Os03circ13579	HWI-ST620_0166:7:2207:4555:155025#0/2_A_CGGGTCCATAAAGACGGTGCTTACATCTGGTTGGCTGCGGGATGAGAACTCTTTCCAACAGCCTGACAAGTGATGTGGTCGAGATGGCAAGTTGTGCTCC	chromosome03	11598443	11599135	minus	AC	CT	0	1	6	1	8	PIF/Harbinger (self-complementation)	PIF/Harbinger (self-complemenation)	cds-cds	chromosome03	11598443	-	Os03t0320100-01	chromosome03	11599135	-	Os03t0320100-01
Os03circ01238	HWI-ST620_0167:5:2307:4592:153096#0/1_A_GGGGGCGCCGAGAAAGGAGGAGGAGAGCTTGGTGGCCATCAGTAAGGTGATTCATGGGTGCCAGAGAAACAGACTACAAGAGCACCTTTTCCTTCTTCTC	chromosome03	1231510	1233342	plus	AG	GT	7	1	0	0	8	null	Mutator	intergenic-intergenic	null	null	null	null	null	null	null	null
Os03circ15643	HWI-ST620_0177:8:1306:12913:134794#0/1_A_GGGGAGAGAAAATATCCGTGGAATCTTGGGGGAGTGATGGGTCTGGTCGAAGAAGAGGTCGTCGTCGTCGTCGTCGTCGAAGGCGTCGTCGGGGAGGAGG	chromosome03	13331233	13331823	minus	AC	CT	2	6	0	0	8	null	null	intergenic-intergenic	null	null	null	null	null	null	null	null
Os03circ21970	HWI-ST620_0167:7:1105:11580:150886#0/2_A_GATCATCAACGACAGGGAGACGGGGAGGTCACGTGGGTTGGCTTCTCCTCCCCCTCTTTACCTTTTCCTCCTCGGTTCGGTTCCGTGGTTCGTCTAGGGT	chromosome03	27271050	27271522	plus	AG	GT	8	0	0	0	8	Tc1/Mariner	null	5utr-cds	null	null	null	null	null	null	null	null
Os03circ25441	HWI-ST620_0166:6:1205:17201:61463#0/2_A_CGAGCGATGCAGATAAGCACCTGTTGGCGAGGCAGACCGGGCTGTCCAGGAACCAGGTGGACAGGAGGTACAACCACTACTGCGACCAGATGCAGATGGT	chromosome03	30817431	30819675	plus	AG	GT	0	0	7	1	8	null	null	cds-cds	chromosome03	30817431	+	Os03t0732100-01	chromosome03	30819675	+	Os03t0732100-01
Os03circ26223	HWI-ST620_0167:7:1204:8307:52343#0/1_A_GGCAAGCTGCAGATGGCGAGGGGTGATACGCTTGACTAAAACCTACACGGTAACTAGGACTCATCACACAAAAGTCCAGTTTAAACTAAGGATGCTCCTG	chromosome03	31327103	31327319	plus	AG	GT	8	0	0	0	8	null	null	cds-3utr	null	null	null	null	null	null	null	null
Os04circ02570	HWI-ST620_0166:8:1102:4620:167941#0/2_A_GAGTACACGCGGGAAGAGATCCTGGGAAGGAATTGCAGCAAGAATCGATGGTTGCACGGCCAAGATTGCTACACCTTCGCTGATAAATAGCCGAGGACAA	chromosome04	13904438	13906184	minus	AC	CT	0	0	7	1	8	PIF/Harbinger	null	intron-cds	chromosome04	13904438	-	Os04t0304200-01	null	null	null	null
Os04circ03503	HWI-ST620_0173:6:2304:19884:153101#0/1_A_GGCGTCGACGAGGAACCTGGTGAACACAGTCATTAAATAAACATTTTGAGGGCTCATTCTCTGCAAGCATCTTTCTTATCTCTGGAAATGTTTCTGCAAG	chromosome04	18925807	18929401	minus	AC	CT	3	5	0	0	8	null	hAT	intergenic-intergenic	null	null	null	null	null	null	null	null
Os04circ04243	HWI-ST620_0167:5:1306:19755:104687#0/2_A_TTCTCTTTATTGATGAAGTGCACACGCTAATTGGAGCAGGTGCTGCTGAAGGAGTAGCAGCACGGGTACTGGAAAGTCTTGGTGCTGATCCAAACAACAT	chromosome04	19827643	19828768	minus	AC	CT	5	2	1	0	8	null	null	intergenic-intergenic	null	null	null	null	null	null	null	null
Os04circ05304	HWI-ST620_0166:6:2104:7070:154987#0/2_A_GCGGTTAAATCCAACACCTTACAAGGTTTGATCTGTACTTCAGGAAAAATCCATTTGGTGGAGAATTCACTGTTTTTGCTGGTCTTGAAGAATGCATTAA	chromosome04	21536151	21540525	plus	AG	GT	0	0	8	0	8	null	null	cds-cds	chromosome04	21536151	+	Os04t0429800-01	chromosome04	21540525	+	Os04t0429800-01
Os04circ00924	HWI-ST620_0167:4:2206:12218:70092#0/2_A_TGAATATGGATATAATGGAAAAGGTTATTGAGGCACGGTGAGGAAGGCCGCCGAGCTGTATGAGAACCATCCTAGCGCGTTCATGCTGCAGCAGTTTGAG	chromosome04	4454195	4455014	minus	AC	CT	5	2	0	1	8	null	null	cds-cds	chromosome04	4454195	-	Os04t0165700-01	null	null	null	null
Os05circ03983	HWI-ST620_0171:5:2303:17375:116714#0/1_A_GTTCCCTTCAGCCATTTTCATTAGCATATACCTTCGTTTTCTTGTGCTGTTTGTCGCATCAAATATACCGACCTGTAACTGGCCTCCCTGCCCTTTTACC	chromosome05	3768058	3768722	plus	AG	GT	6	1	0	1	8	null	null	cds-cds	chromosome05	3768058	+	Os05t0164100-03	chromosome05	3768722	+	Os05t0164100-03
Os06circ08901	HWI-ST620_0167:7:2306:12789:18390#0/1_A_GCACCCAGTTGCCCAGCCCCAGCGCCTCCGGCACCAACACCCCAGGCACAGCGAGCATGGCCAATCGCCCGTTCTTGATCTCCTTGAGCTTGTACTCCTC	chromosome06	12521265	12521686	plus	AG	GT	6	0	2	0	8	null	PIF/Harbinger	cds-cds	chromosome06	12521265	+	Os06t0320500-01	null	null	null	null
Os06circ06510	HWI-ST620_0171:3:1308:15356:183013#0/1_A_CGGTAATGTAGTCGGTGACACTTTTAAGAGTTTCCTTCTTTGCAGCAACCTGAACATTTCCATGAGGATCTCTTTCAAGCAAAAGTTGCTCCTGGATGGT	chromosome06	7649509	7649887	minus	AC	CT	2	4	1	1	8	null	null	cds-cds	chromosome06	7649509	-	Os06t0247500-01	chromosome06	7649887	-	Os06t0247500-01
Os07circ18897	HWI-ST620_0167:5:2305:4770:43152#0/1_A_GGTCTAGGCTGATGGTATGTGGTGGGAGGTGCAGGAGGTGCAACAACAGGCTGCGGTTGTCCTTGTGCCTGTGTTGGACTTGAGGGCTGTACAGGACTCA	chromosome07	28324234	28324494	minus	AC	CT	2	6	0	0	8	null	null	intergenic-intergenic	null	null	null	null	null	null	null	null
Os08circ01722	HWI-ST620_0167:7:2301:15284:155245#0/1_A_TTCGCCTTTCATACCGTCTGCTTTCATATTTGGATGTCCTCCGCTCTTTTGGTTGGTAGGGTAACACAAGAAAAATATCACTAGATATTTGAGACAGTAA	chromosome08	2177334	2177839	plus	AG	GT	4	4	0	0	8	null	null	intergenic-intergenic	null	null	null	null	null	null	null	null
Os08circ01739	HWI-ST620_0171:4:2101:18291:40102#0/1_A_GTAAGTGCATGGAATTATCTCTCCGTTTATGTATTTATCACTAGATATTTGAGACAGTAACATTCTTAGATAGATCAGAATTTCCGTCTTTTGTCACATT	chromosome08	2177356	2177885	minus	AC	CT	3	5	0	0	8	null	null	cds-3utr	null	null	null	null	chromosome08	2177885	-	Os08t0139100-01
Os08circ03990	HWI-ST620_0171:7:1201:9838:161900#0/1_A_CCAACATGTTTAACTCCCTTTGATACTCCAGAAAGAGGTCACATAACTGCCTAATTTTTTAAGCAGCCCAAAAAACACACTCAGGTCATCCCTTGCTTCA	chromosome08	4948795	4951071	minus	AC	CT	3	5	0	0	8	null	Mutator	intergenic-intergenic	null	null	null	null	null	null	null	null
Os09circ02045	HWI-ST620_0166:8:1106:10374:47992#0/1_A_CCCAAGGATGGCAAAAGTTACAATAGCCCCAAAATTTGCAAAGAATGATTTTGGGGATAGACTGAATCCTGATTGGGTTAATTGAGAAGAATATGAAGCC	chromosome09	6995226	6999087	minus	AC	CT	0	0	3	5	8	null	null	intron-cds	chromosome09	6995226	-	Os09t0286400-01	null	null	null	null
Os10circ07117	HWI-ST620_0171:8:1301:8781:57607#0/1_A_GGCTTTTGGGGATGAGGGGTATTCTGGTCTTTTCACAGCTTCGAGGTCCTATGTGCTAGTGCAGATTGCACATCCAATTACACAAATTATTGCTGCAATG	chromosome10	19669053	19671188	plus	AG	GT	1	7	0	0	8	null	null	intergenic-intergenic	null	null	null	null	null	null	null	null
Os10circ07118	HWI-ST620_0171:7:2205:18541:86819#0/1_A_GGGGTATTCTGGTCTTTTCACAGCTTCGAGCTTACCTCCCTCGGCTTCTCTTCGGTTGCTGGCGCCTTCTCTGGCTCAGCGGCAGCGGCGGTTTCAGTTG	chromosome10	19669198	19671188	plus	AG	GT	3	5	0	0	8	null	null	intergenic-intergenic	null	null	null	null	null	null	null	null
Os01circ13734	HWI-ST620_0166:6:2207:2938:139730#0/2_A_TGAAGAGGAAGATAAAGAGTCAGATGGCTATGAATCTCCACCTATGATGATGTCCCTGATTTCACCTTGGATGATCCCTAAAAGATTAATTGGGAAGACC	chromosome01	20614573	20619083	plus	AG	GT	0	0	4	3	7	null	PIF/Harbinger	intergenic-intergenic	null	null	null	null	null	null	null	null
Os05circ03811	HWI-ST620_0166:6:2306:16159:37190#0/2_A_GCACGATTTCACTCTACACAAGTCGTATTGCTCGTCCAGTGCTTAATATGGAGTTAAGAGCTTTTGAGCTAATAGAAGTTTCCCATCAAGAGGAGATAGA	chromosome05	3617192	3617472	plus	AG	GT	0	0	7	0	7	null	Mutator	cds-cds	chromosome05	3617192	+	Os05t0161400-01	chromosome05	3617472	+	Os05t0161400-01
Os10circ11013	HWI-ST620_0171:5:2104:15890:120893#0/1_A_GGCTTGGTATAGTGCTGATTGGATGCGGAAGCAATAAGATAGAAAACTGTAGAGATGGCAATGGTCTTGTACTTTCCCCAGTATGTATCAGCCAAGAAGG	chromosome10	23612234	23612794	plus	AG	GT	2	1	0	4	7	Tc1/Mariner	null	cds-cds	chromosome10	23612234	+	Os10t0579600-01	chromosome10	23612794	+	Os10t0579600-01
Os01circ17780	HWI-ST620_0166:6:1202:20981:113013#0/2_A_GGGTTCGCCAAGTTCAAGACCGAGTTCTATGACAAGAAGCCGGAGCTCTTCGAGCCGCTCAAGGCCGGCCAGGCACCCAAGATGGACGCCGCCGTCGACC	chromosome01	27430461	27430688	plus	AG	GT	0	0	7	0	7	null	null	ncRNA-ncRNA	chromosome01	27430461	+	Os01t0639900-01	chromosome01	27430688	+	Os01t0639900-01
Os01circ04293	HWI-ST620_0171:3:1202:11541:29067#0/2_A_CTATCCATCAAAAGAAAAGCGCCTTGTAGATGAAGTATTAGCACTCTTATAACTTTCTTGCTCGAAGTTTCTTGATACCAAGGCAAGTAGCTTATAAGAA	chromosome01	4335034	4335656	minus	AC	CT	0	7	0	0	7	null	Tc1/Mariner	5utr-cds	chromosome01	4335034	-	Os01t0182600-02	null	null	null	null
Os02circ17990	HWI-ST620_0171:1:1301:10293:61067#0/1_A_GCCAAGGTCATGCCTTTTTCGGACAAAGACCTCTTGCAGTTTTTTGCGAAGCATGAACCTCAAGTAGTGGTCAGTACCGAAAGGTCGAATACCCATATAT	chromosome02	24698962	24700845	minus	AC	CT	0	0	3	4	7	null	null	5utr-cds	chromosome02	24698962	-	Os02t0608400-02	chromosome02	24700845	-	Os02t0608400-02
Os02circ04624	HWI-ST620_0167:5:1102:12865:65247#0/1_A_CGGAGTAGGTGATCCCCTTGGCGAGCTCGCGCACCGACATGAGCGTCTTGCGGTCGGAGAGGTTGTATCAGGAGATCTTTCTTCAAGATGGCTACGGAGG	chromosome02	2766681	2769547	plus	AG	GT	4	3	0	0	7	null	null	intergenic-intergenic	null	null	null	null	null	null	null	null
Os02circ29672	HWI-ST620_0177:8:1308:6681:10761#0/1_A_CTTTGCCTTCATCCTCCGTTTCTTCTCGTTGGCATCAACCCAGGTGTAGTCAGAAGGTATTTGGAATGGATCAACTACGCGTTCTCCAGAGCACATTATC	chromosome02	35476101	35476383	minus	AC	CT	3	4	0	0	7	null	null	ncRNA-5utr-acrossGene	null	null	null	null	null	null	null	null
Os03circ13281	HWI-ST620_0166:6:1205:13382:167905#0/1_A_TCCACCCGTGAAATAATTAAGAAGCCCTTTGGGAGATACAAACTGCATGGCCTTTCTGTGACCTTCACCTGATATTTGTGCTAAAACCTTCCCGTTGGGC	chromosome03	11158932	11161117	plus	AG	GT	0	0	5	2	7	null	null	5utr-cds	chromosome03	11158932	+	Os03t0311300-02	chromosome03	11161117	+	Os03t0311300-02
Os03circ14954	HWI-ST620_0167:7:2206:13918:46695#0/1_A_GGCTTGCTCTTCTCGTCCTTTGCTCCTTCGTCGTCATTGCTAGCCTCTCCAATGGAGGAGAGTGTAAACAAGCTACTCTACCTCTCCTCAACTACTACTT	chromosome03	12954219	12954846	minus	AC	CT	2	5	0	0	7	null	null	cds-3utr	null	null	null	null	null	null	null	null
Os03circ20387	HWI-ST620_0171:6:1206:6737:50070#0/1_A_TTCCGTTGTTGGTGTCCATATCCTAGCTGGAAGGCTATTCAAGTTGTCCCATAGATCATCAGGTAGTTCATTCCCAACTGTGCTAGACCTTATTATGGCA	chromosome03	23722630	23723402	minus	AC	CT	0	0	5	2	7	null	null	5utr-cds	null	null	null	null	chromosome03	23723402	-	Os03t0608700-01
Os03circ00212	HWI-ST620_0173:6:1203:6975:130195#0/2_A_GCCTGGCCAAAAATAATAATAATAATAATAATCTGGCCCACCTGTCAGTAGGCGGTGGAGGAGGAAGAGGAGCACGGCACGGCGATGGCGCCCGTGCCCC	chromosome03	267252	267994	minus	AC	CT	6	1	0	0	7	Mutator || PIF/Harbinger	null	intergenic-intergenic	null	null	null	null	null	null	null	null
Os03circ07620	HWI-ST620_0173:6:2104:19940:45617#0/1_A_CGTTCGGTTTTTCTCTTCTTTTTTTCTTTTTTGGGTGTGTTGTGCTGGCGTGTGAAGCTGGTGAAATTGCTGTGCTTGAAGTGCCTGTGGAGGTCGCGCT	chromosome03	6585593	6586054	minus	AC	CT	7	0	0	0	7	null	null	intergenic-intergenic	null	null	null	null	null	null	null	null
Os04circ01744	HWI-ST620_0171:5:2208:9535:27781#0/1_A_CTGCATAATACGTGACCTGATGTGGGGTGCCATGCAAAGGGACAATGTTCAGGCTCACAACATGCAAAGGGGCATCATAGAATGCAACAGCAGTCAATTC	chromosome04	10150604	10152315	minus	AC	CT	0	0	3	4	7	null	null	cds-3utr	chromosome04	10150604	-	Os04t0252200-02	chromosome04	10152315	-	Os04t0252200-02
Os04circ03218	HWI-ST620_0177:7:1306:7180:171190#0/1_A_TTTCTTGAATGCTTCTTCTAATTGTTCAGGCGTGGCACTTAAAGGCAGATTCCGTACATATATCGCATGTGCATCAACTTGTGACTTCTAACTTGGATTC	chromosome04	18397708	18397829	minus	AC	CT	0	0	7	0	7	null	null	cds-cds	chromosome04	18397708	-	Os04t0372800-01	chromosome04	18397829	-	Os04t0372800-01
Os06circ14709	HWI-ST620_0173:6:1108:6175:88974#0/2_A_GTCACAGAATTCGTGAGAGAACTGATGCTCTGGATGCTGCAGGAAACACCACTGCTGCCATCGGGAAGGTCTTTTCGAGGCTATCACTGGGTATGGTCTT	chromosome06	27152533	27153836	plus	AG	GT	4	3	0	0	7	null	null	cds-cds	null	null	null	null	chromosome06	27153836	+	Os06t0644200-01
Os06circ16741	HWI-ST620_0171:6:2206:10133:94257#0/2_A_CGCGACGCCTACGCCTTCCACCAATATTCTTCAAGAGCCAGCACTTGGTTGATCTACAGATATTGTTACTGCTACTGCTACTACTGCTGCACATGGTGAT	chromosome06	29244154	29245276	minus	AC	CT	0	1	2	4	7	Tc1/Mariner	null	5utr-cds	chromosome06	29244154	-	Os06t0680900-02	null	null	null	null
Os06circ17055	HWI-ST620_0171:4:1301:8967:47896#0/1_A_GGGTGCGCTTGGCGGGAACAACTATGTCCAAAGGTGGCTCAATTACCCACCAGATTAACCAGACATGGTTCCTATTGTAGTTTGTGCAGATGTAAGATAT	chromosome06	29574974	29575230	plus	AG	GT	4	1	0	2	7	null	null	ncRNA-ncRNA OR intergenic-ncRNA	chromosome06	29574974	+	Os06t0687900-01	null	null	null	null
Os06circ17230	HWI-ST620_0177:8:2105:4624:52676#0/1_A_TGCGTGTTGGGGATTAGGGTTTGGTGCAACTTGTTCATCAATGGAGAGCCATCTTTCCTGAAATTTAGCAAATCACCACGGAATTCGGTACCATTGTCTA	chromosome06	29848466	29851479	plus	AG	GT	3	4	0	0	7	null	null	intergenic-intergenic	null	null	null	null	null	null	null	null
Os07circ12795	HWI-ST620_0167:5:2202:20102:10989#0/1_A_CGCCGCCTTCTTCCCGCCGCCGAACCCGAACACCTCGGTGTAGGGCTGGAACGGGGTGGACTTCACCTCGCCGGTCTCGAACCGGGTGCCGATGATCTCG	chromosome07	22977648	22977944	minus	AC	CT	7	0	0	0	7	hAT	null	cds-cds	null	null	null	null	null	null	null	null
Os07circ17949	HWI-ST620_0173:6:2104:7595:15517#0/1_A_GGGGACGGCCGGGAGGAAGGTGGGGGTGAGCGAGGTGGAGAAGAGGGTGGCCGCCATGGCGAGGCGAGGTGGTGATCTTGGCGCGAAATCATCCCGAGGC	chromosome07	26871956	26873360	minus	AC	CT	6	1	0	0	7	null	null	intergenic-intergenic	null	null	null	null	null	null	null	null
Os07circ21485	HWI-ST620_0166:6:1303:7909:117873#0/2_A_CGGGGTTAATTTAAAGAAGTCCCCTGTCCTCCAGTATCTGTATTACCTAGCTCAGAAATTCAATCTTCATTTGATGGTCAATGCCGATAGAGAACTACTT	chromosome07	30168657	30170949	plus	AG	GT	0	0	2	5	7	null	null	cds-cds	chromosome07	30168657	+	Os07t0693500-01	chromosome07	30170949	+	Os07t0693500-01
Os08circ01723	HWI-ST620_0171:7:1202:16819:94788#0/1_A_GGGTCCATCTCTTCGCCTTTCATACCGTCTGCTTTCATATTTGGATGTCCTCCGCTCTTTTGGTTGGTAGGTTGCAGGGTAACACAAGAAAAATATCACT	chromosome08	2177327	2177839	plus	AG	GT	2	5	0	0	7	null	null	intergenic-intergenic	null	null	null	null	null	null	null	null
Os08circ02524	HWI-ST620_0171:7:1204:7504:75834#0/1_A_GTGGTCCTCTGGGAATATAATAGTTGTGTCGAGATTCCAGCCACAAGCTGCTGCTGCTACATCTCCAATAGCAAAGATACCAGGTATACTAGTTCTAAAC	chromosome08	2978494	2979908	plus	AG	GT	1	6	0	0	7	null	null	cds-cds	null	null	null	null	null	null	null	null
Os08circ05105	HWI-ST620_0166:6:1206:16950:195566#0/2_A_TTAAAGGACAAGCTAGGAAACTCGCAAAAATGGAAGATGAAAGTGATGATGGAACTGATGAATATTCTCTACGAAATGTTACCTGAAGCTCGGGTGGTTT	chromosome08	7495160	7498860	plus	AG	GT	0	0	4	3	7	Tc1/Mariner	null	cds-cds	chromosome08	7495160	+	Os08t0223766-00	chromosome08	7498860	+	Os08t0223766-00
Os09circ10113	HWI-ST620_0167:5:2105:1564:31083#0/1_A_GTCTTGATGGAGTGGGAGTAGTTGGAGAAGGTGTAGTTGTTGTAGATGAGGCCGTAGTACTTGAGACCGAACAGTTCAGATGCTGTTGGCACGGTGACCG	chromosome09	21995615	21997985	plus	AG	GT	6	1	0	0	7	null	null	intergenic-cds	null	null	null	null	null	null	null	null
Os11circ08239	HWI-ST620_0171:7:1201:14794:181112#0/1_A_GGGCACCGTGCCGTACGGGGCGGCCGTCTGGTCGCGCTCCGGCCATGGCCGCCTCGGCAGCGTCACCATCGACGCGGCTCGCCTGACGCCGCGCTCCGGC	chromosome11	25810725	25811624	plus	AG	GT	1	5	0	1	7	null	null	cds-cds	null	null	null	null	null	null	null	null
Os12circ10306	HWI-ST620_0171:4:1107:16574:50443#0/1_A_TGTAGTAGTAGTTTTTTTTAGGGTTAAATTTAGGGCTTAATCTCTCTCCTCCTCACTCTCCTCCCATAGAATTTACATCAAGGACCTTGACACCTGAGAT	chromosome12	25431062	25431256	minus	AC	CT	4	3	0	0	7	null	null	3utr-3utr	null	null	null	null	null	null	null	null
Os01circ10230	HWI-ST620_0171:4:1104:11826:153322#0/1_A_GGGATGACCGGCTTGATGACGTGCTCCTTGAGGTCGAGGGTGATGGTCATCATCCCGGGCCTGAAATCGAAGTTCTCCTTGACGATCTTGAGGATCTCCT	chromosome01	12507085	12507516	plus	AG	GT	0	5	0	1	6	null	null	intergenic-intergenic	null	null	null	null	null	null	null	null
Os01circ12803	HWI-ST620_0167:5:2308:17793:134449#0/2_A_GCCACCGGCAAGCCGGAGAGCTTCGGCGGGCCCTTCCTCGTGCCCAGCTACCGTGGTTCAGAGTAAGACGTACATGGAGGTGAAGGGAACCGGCACGGCG	chromosome01	18980498	18980921	plus	AG	GT	6	0	0	0	6	null	null	cds-cds	null	null	null	null	null	null	null	null
Os01circ13464	HWI-ST620_0173:6:1105:8110:3296#0/1_A_GAGGGCGAAAGGCGGCAGCGATGGCTGCTGCGTAGCGAGGCAATCATGCAGGGGGAGGATGATGATGAGGAAGATCTTGAGGCCGGAAGCAGCCGGGACG	chromosome01	19646925	19647614	plus	AG	GT	5	1	0	0	6	PIF/Harbinger	null	intergenic-intergenic	null	null	null	null	null	null	null	null
Os01circ14150	HWI-ST620_0167:7:2102:5927:199081#0/1_A_GTGGAGGATCGGCCGGAAGGCGTCCTCCTCCAGCGGGTCATAGATCTTCCTCGTCGCAACCTTCACCGGCAGTCCCCTGATATTCTTCAGCAAGCAGCAG	chromosome01	22230439	22230791	minus	AC	CT	6	0	0	0	6	null	null	cds-3utr	null	null	null	null	chromosome01	22230791	-	Os01t0550300-03
Os01circ00635	HWI-ST620_0166:8:1106:9368:14367#0/2_A_CCAAGTTCATGCATCATTTGTGTCAGAAGATACATGGGACCTACAAATATTTAAACAATTACCATCATCTGTTTTGAGCAATGCAAATGCCCTACGGTTT	chromosome01	339060	340198	plus	AG	GT	0	0	2	4	6	Tc1/Mariner (self-complementation)	Tc1/Mariner (self-complementation)	intron-intron	null	null	null	null	null	null	null	null
Os01circ24434	HWI-ST620_0171:5:2302:15687:16174#0/2_A_CTAAACATTTGACAATAAACCAGGCCAAGATAAATGACCGCTATGAGTTCCCATTACAATTAGATCTTGACAAGGATGATGGAAAATACCTCTCTCCAGA	chromosome01	34291950	34294536	minus	AC	CT	4	0	1	1	6	null	null	cds-cds	chromosome01	34291950	-	Os01t0771350-01	chromosome01	34294536	-	Os01t0771350-01
Os01circ31368	HWI-ST620_0167:5:1201:18444:164042#0/1_A_GGTAAGAGCTTCGAGTTTCAATGGATTTTCTGCTAGAGAGACTGCCCTTTCTTCATATTCTTCCAGGCCATCGAGCTGTATCAAACAAAGGACAGGTCAT	chromosome01	41611375	41611495	minus	AC	CT	1	0	5	0	6	null	null	intergenic-intergenic	null	null	null	null	null	null	null	null
Os02circ12300	HWI-ST620_0177:7:1207:6872:95805#0/1_A_CCCTTATTATGCTATTGAGTTTACCTGCAATCTCTAGAACAGGATAAAATCGGGAAAGTGCCCATGTAGATTCTTCCCCAGTTCGCTCCTTTCTAAGTCC	chromosome02	15693575	15694946	minus	AC	CT	0	1	4	1	6	null	PIF/Harbinger	intron-3utr OR 3utr-intergenic	chromosome02	15693575	-	Os02t0452500-01	null	null	null	null
Os02circ12763	HWI-ST620_0166:6:1308:6835:59185#0/1_A_GTATCCCTTGAAGTCAAGATTTGATGCAGACGAATGAAAAATCATGTCTCCTTTAGAATTACCAATATCAACTTGAATCTTCCTGACTTGAAGGCGACTA	chromosome02	16922148	16925278	plus	AG	GT	0	0	5	1	6	PIF/Harbinger	PIF/Harbinger	5utr-cds	null	null	null	null	chromosome02	16925278	+	Os02t0474300-01
Os02circ13280	HWI-ST620_0171:3:2105:18226:159119#0/1_A_GTGCGCTTGGTTTAGGAGCAGCTGGATCTTCCGGGGGCAATCCAAGTTTCCTTCTCCTTTCAGCCTTGTCCTCTGCCAAGAACAAGAACTCGTTGCCTTC	chromosome02	18682766	18683866	plus	AG	GT	1	5	0	0	6	null	null	cds-cds	chromosome02	18682766	+	Os02t0504500-01	null	null	null	null
Os02circ15132	HWI-ST620_0173:6:1104:5250:27362#0/1_A_CAGGTCTTGATCTTCCAAGTGTGTGTGCTCCAGATAATGCAACAATTTCCTTGTCATCAAGGCCCATCCTGTAGAATACCTCAATTTATTTACGGAATAA	chromosome02	21695501	21697849	minus	AC	CT	6	0	0	0	6	Mutator	null	cds-3utr	null	null	null	null	null	null	null	null
Os02circ16062	HWI-ST620_0167:5:2206:14950:23585#0/2_A_CCCTCTGAAATACAGAGAGGGTGGTGTTCTGAAACGAGCTGGACATACTGAAGCATCTGTAGATCTTATAATGGCTGCTTCTTTGGTTACCCCAGAGGCC	chromosome02	22760130	22761171	minus	AC	CT	6	0	0	0	6	null	null	cds-cds	null	null	null	null	null	null	null	null
Os02circ20525	HWI-ST620_0166:6:1102:21074:17845#0/2_A_CCCCAAGAACGCGCTCAAGTTCGCGGCGTGCGCCGACGTGCTGGTCCTCTTCTTCACCGTGGCCAGCGCCTGCGGCAAGTACTGCCCGACGCCTTCGACG	chromosome02	27670753	27670893	minus	AC	CT	0	0	6	0	6	null	null	intergenic-intergenic	null	null	null	null	null	null	null	null
Os02circ07752	HWI-ST620_0171:5:1205:10348:60334#0/2_A_TAAAATTATGCATGAAACAAGATTGTATCTCTCCCAACGATAACATCCGTAAAAGGTGAAGAACAAAATTGTCCGGGAGTTAGTAGACTTCGCCAAGCAG	chromosome02	5711321	5714032	minus	AC	CT	0	0	1	5	6	null	null	cds-cds	chromosome02	5711321	-	Os02t0202250-01	chromosome02	5714032	-	Os02t0202250-01
Os02circ08129	HWI-ST620_0166:6:2206:3911:115746#0/2_A_GTCAAACTTAGTGCCTTTCAAGAGTTTGTTGAACAGCTTCCCAAATCTAGGAGCCGTGCTATAATGATATATGTATTAACTGTTCTAAGCAACACAACTA	chromosome02	6113255	6116679	plus	AG	GT	0	0	5	1	6	null	null	5utr-cds	chromosome02	6113255	+	Os02t0208600-01	chromosome02	6116679	+	Os02t0208600-01
Os03circ21467	HWI-ST620_0171:7:1301:10730:178807#0/1_A_CCCCACCGAAGCTCATATGGTTGTAGTTCACCACGCACGCCTTATCGAAAACATAGCCAGGTTCTCTTGTCCCATTAAGCACAGGAATCAGCATGGCAAA	chromosome03	26438815	26441786	minus	AC	CT	4	2	0	0	6	null	Mutator	intergenic-intergenic	null	null	null	null	null	null	null	null
Os03circ21994	HWI-ST620_0166:6:1208:2856:127117#0/1_A_GGCGGCTACGGCGGCGGTCGTGGAGGCGGCGGCTACGGAGGAGGTCACGTGGGTTTGGCTTCGTCACCTTTTCCTCCGAGCAGTCGATGCGCGACGCCAT	chromosome03	27271518	27271720	plus	AG	GT	2	0	4	0	6	null	null	cds-cds OR intergenic-intron	null	null	null	null	null	null	null	null
Os03circ25981	HWI-ST620_0166:6:1102:3753:77681#0/2_A_GTGTTGGTAAATCTCAAGAGCAAGACTGATACTAAGAAGATTTCAGCAGTTTCGATATTCTTTGAGACAATGCCCTACAGATTGGATGAAAGCACTGGCT	chromosome03	31112359	31113747	plus	AG	GT	0	0	6	0	6	null	null	cds-cds	chromosome03	31112359	+	Os03t0738400-01	chromosome03	31113747	+	Os03t0738400-01
Os03circ26039	HWI-ST620_0166:7:1205:7182:78580#0/1_A_GCTGCAATGTGCACGTTTTCTAAAACCTTCTCCACTCTTGAACCATCTATGCCCTTGCTGTTCCGTTCAAAGTTTCTTAGTTCTTGTACTTCATGGTTTC	chromosome03	31114006	31114626	plus	AG	GT	1	4	1	0	6	null	null	cds-3utr	chromosome03	31114006	+	Os03t0738400-01	chromosome03	31114626	+	Os03t0738400-01
Os03circ03918	HWI-ST620_0167:7:1307:5645:30490#0/1_A_CATGTGTATGTTTCTTTCTCCTCTTTTTCTCACTGTCTTCTCCTTTTTTTTCTTTTCTTTTCTTGCTGTAGACGTGCGGCAGCCGCCGGAGATCCTTCTT	chromosome03	3195477	3195624	minus	AC	CT	6	0	0	0	6	null	Tc1/Mariner || PIF/Harbinger	cds-cds	null	null	null	null	null	null	null	null
Os03circ28129	HWI-ST620_0173:6:2108:6629:2848#0/2_A_GTTGAGGAGCAGAAAGGGGAAGGGGAGGAGGAAATGGAAGAGGAGGTGCAGGATGGTGCTGCAGGCAAGAGGAAGAGGGGCGCCAATAATAAGAGGAATC	chromosome03	33155443	33155760	minus	AC	CT	6	0	0	0	6	null	null	intergenic-intergenic	null	null	null	null	null	null	null	null
Os03circ29094	HWI-ST620_0166:7:2301:8077:173323#0/2_A_CGCAAGCATCTTTCACTGTCTCCGGAGATTGAACACAAAACTGTTACTGGTCTTCTAAGATTAATTGAGAGTGAGAGGTCAGCCAAAATTGCCAACAAAC	chromosome03	33572196	33572732	plus	AG	GT	0	0	4	2	6	PIF/Harbinger	null	3utr-3utr	null	null	null	null	null	null	null	null
Os03circ30238	HWI-ST620_0166:6:1302:18546:181151#0/1_A_CTTTGGTATCTCGTTTATGTCCTCCAAATAATCCCTAATTATATTGATTTTCTGATGCGCATAGATTGTCTAGTTGAGGGCAATGGACCACCTAGGACGA	chromosome03	34506879	34510506	plus	AG	GT	0	0	6	0	6	null	null	cds-3utr	chromosome03	34506879	+	Os03t0805100-01	chromosome03	34510506	+	Os03t0805100-01
Os03circ06436	HWI-ST620_0167:6:1207:10729:127179#0/1_A_CACTCGGCTTCTTCATGTAATCATCTTCTTCTTCCTCATACCTCCCACCATGGCCTCCACCACTTGAAGCACCATACCCATATCCACCACTAGGCTTCTT	chromosome03	5823335	5823541	minus	AC	CT	3	3	0	0	6	null	null	cds-cds	null	null	null	null	null	null	null	null
Os04circ11702	HWI-ST620_0167:5:2107:11213:122656#0/1_A_CTGAGGCCTGAGGCCGTGTGAGGTTGGTGGATTGCGTCCTGAGGTATATCCTCACCGGGTGGAGGAATGCCTGGAGCACGAGGTCAGGGAGAGACGCGAA	chromosome04	29271620	29272520	minus	AC	CT	6	0	0	0	6	PIF/Harbinger	null	intergenic-intergenic	null	null	null	null	null	null	null	null
Os04circ12905	HWI-ST620_0177:8:2103:7884:161082#0/1_A_CGGCTCTCGATGGACTTCTTCTTCTCGGCGACGGCCTTCTCCTTGCTCGCGGCCGCCCACACCTCCTCGATGACTTTGTTGTTTGTAAGAGGGATTCTTT	chromosome04	31099368	31100949	plus	AG	GT	2	4	0	0	6	Mutator	null	cds-cds	null	null	null	null	chromosome04	31100949	+	Os04t0605900-01
Os04circ12955	HWI-ST620_0171:2:2301:18085:141261#0/2_A_CTTATATTTGCAAATACAATGTTTTATGTTGCTTTTGACATTCTTTATGCTGGAGACACCAGTGTTATCCACCAAAGTTTGACAGAGCGGCATGAAATTC	chromosome04	31131978	31134427	minus	AC	CT	0	0	2	4	6	null	null	intergenic-intergenic	null	null	null	null	null	null	null	null
Os04circ13731	HWI-ST620_0171:3:2303:20993:120026#0/1_A_CCAGCGTAATATTGTACTTGCTCTTCAGTTCTTCATGCTCTTCGACAGTAGAAGATACCTGGCTTTCCAGCTCTTCCTGCTTTGCTATGGTATGGTAAGC	chromosome04	31692913	31693520	plus	AG	GT	1	5	0	0	6	null	null	intergenic-intergenic	null	null	null	null	null	null	null	null
Os04circ13949	HWI-ST620_0171:4:1104:14036:189300#0/1_A_GTGCTCATTAAAAGGATCCAGATTAAATCGAACAGAACCTGAAAATAGGACAGTGTTCAGGCGGTGAGCAATTATAAGCATTGTACAACTCTTGAATTCT	chromosome04	32004137	32004869	plus	AG	GT	3	1	1	1	6	null	null	intergenic-intergenic	null	null	null	null	null	null	null	null
Os05circ10133	HWI-ST620_0177:8:2307:16501:24247#0/1_A_CGGGGAGGAGGAGAGCGTGGCGTTGAGGGTGGGGTGGAGCTCAACAGAGGCCCAAATGTAGTCGTCATAAGTGTGGCGCTTTATCAAGTTCTCTGTGTCG	chromosome05	19646732	19648412	plus	AG	GT	1	5	0	0	6	null	null	intergenic-intergenic	null	null	null	null	null	null	null	null
Os05circ17869	HWI-ST620_0167:6:1204:3221:2233#0/1_A_GTGTCTCCACCACCAATGACAACCACCTTTCTCCATTCAACACGCATTACCTCAAGGGCCTTCACATTTCCATTCTCATCTCCGATAAATCGCTTCGTCA	chromosome05	27751205	27751647	plus	AG	GT	6	0	0	0	6	null	null	cds-cds	null	null	null	null	null	null	null	null
Os06circ02797	HWI-ST620_0173:6:2304:17341:136021#0/2_A_GATGGAGAAGGTGCAAATCTATCAGAAGAAGAAGAAGGTGGCCATTGCTGGGCTCAAGGCTAAGACTAAGTACGTCAGGAGCCAAATAGGCAAGCGGATG	chromosome06	2009591	2010379	plus	AG	GT	5	1	0	0	6	null	null	cds-cds	null	null	null	null	null	null	null	null
Os06circ18553	HWI-ST620_0173:6:1102:14951:13938#0/1_A_GTGGACATGGACGCAGGTGTGGGTGTGTGAGAGGTCATGCACAGGCGGGTTGCAGCGCCATCCTCGCCCATTGTTCTCACCTGCATCCCTGGACTGCAAT	chromosome06	31332053	31332570	plus	AG	GT	5	1	0	0	6	null	null	intergenic-intergenic	null	null	null	null	null	null	null	null
Os07circ06380	HWI-ST620_0171:5:1303:8802:82230#0/2_A_CAAGAATGGAACAATTAGTCTGGAAGAACTGAAGCAGATTATGTGAAGGCGGGGAGTTACTTGACCGGATACTAGCCAAGAAAGATAGCCGTTATAGCGA	chromosome07	13457844	13461842	minus	AC	CT	1	0	1	4	6	null	null	cds-cds OR 5utr-intergenic	chromosome07	13457844	-	Os07t0409900-01	chromosome07	13461842	-	Os07t0409900-01
Os07circ06869	HWI-ST620_0167:7:1303:9222:54368#0/1_A_GTGTGGATTTCGAATTCCAAGTGAAGTGGGAGCAGCGAGTGTTGGGATCCTGATCAACGGTGACGACGGAGCCAGTGCCGTTGTACCAGTAGGACTCCCT	chromosome07	15193473	15194131	minus	AC	CT	6	0	0	0	6	PIF/Harbinger	null	intergenic-intergenic	null	null	null	null	null	null	null	null
Os07circ12796	HWI-ST620_0167:5:2203:15489:162067#0/1_A_CGCCGCCTTCTTCCCGCCGCCGAACCCGAACCTCGATCCAGATCAGCGTCGAGATCGAGAACGGCAGCGGCTGCCCCAGGTACGACGACCCATCCACCAG	chromosome07	22977080	22977944	minus	AC	CT	4	2	0	0	6	null	null	cds-cds	null	null	null	null	null	null	null	null
Os07circ14283	HWI-ST620_0167:5:1205:18365:112510#0/2_A_GAGCCAGCCGTCGTCGTCGTACCACCGGCGGAGGAGGGAGTCGTGGGAGTCCGCGGCGGGGAGCAGGCACAGCTCAGCTCGGAGAAGCGAAGAGGAGGAA	chromosome07	23550670	23551080	minus	AC	CT	6	0	0	0	6	null	null	5utr-cds	null	null	null	null	null	null	null	null
Os08circ01724	HWI-ST620_0171:3:1102:1951:79778#0/1_A_GCTGGGGGTCCATCTCTTCGCCTTTCATACCGTCTGCTTTCATATTTGGATGTCCTCCGCTCTTTTGGTTGGTAGAATTAGCTAGTAAGCAAGTTCTTTC	chromosome08	2177578	2177839	plus	AG	GT	5	1	0	0	6	null	null	intergenic-intergenic	null	null	null	null	null	null	null	null
Os08circ11912	HWI-ST620_0171:4:1301:6420:20166#0/2_A_GAGTATTTATCTCTGATGACTTCGATGGTGAACTGTTCCCCAGATACTTCAGCTTTGTAGAAGGTGTAGCTGACAGTAGCTCTTATGTCATCAAGGAAGA	chromosome08	24214761	24216023	minus	AC	CT	4	2	0	0	6	null	null	cds-cds	null	null	null	null	null	null	null	null
Os08circ16097	HWI-ST620_0167:7:2304:4081:91686#0/1_A_TGGGGTCCAGCTGCGGCGGCACGAACCCCGCGGGGGCTGGCTTCTTCTCCGGGTAGACGCCGTCCTTCGGGTGGAGGTACTGCACCTCGCCATTGGGGAA	chromosome08	28171672	28172013	minus	AC	CT	6	0	0	0	6	PIF/Harbinger	null	cds-cds	null	null	null	null	null	null	null	null
Os08circ04811	HWI-ST620_0166:7:2305:10568:121033#0/1_A_GAGGGCGTTTGCCAGTATGCCTCATTTCGTTAACTGAACAAAATTATCAAAGCTCATAGCACATGAATGTGTAACTTCATTTGGATCTTTTGGGCTCACT	chromosome08	5813801	5814384	minus	AC	CT	1	0	5	0	6	null	null	5utr-cds	chromosome08	5813801	-	Os08t0200400-01	chromosome08	5814384	-	Os08t0200400-01
Os08circ00060	HWI-ST620_0166:7:1304:6576:69145#0/2_A_CTTTAAGATGCCGATGGACTAAAATATGCTCATGAACCCAATATTATCAAGTACACCAAGATTGCCGCAATGCTGCCTACTAGGACTATCAGGGATGTCG	chromosome08	58152	58251	plus	AG	GT	0	0	4	2	6	null	null	cds-cds	chromosome08	58152	+	Os08t0100800-01	chromosome08	58251	+	Os08t0100800-01
Os09circ03064	HWI-ST620_0166:6:1308:18564:40327#0/2_A_GCTGCCAATGCCAGAAAGGACAAGGCACATGAATCATTGGTCCAATTGAGACATGCACGAGATGCCTATGGACATGGGAATGGAGGTTGTTGGAACTGAG	chromosome09	11457625	11458969	plus	AG	GT	1	0	4	1	6	Tc1/Mariner	null	5utr-cds	chromosome09	11457625	+	Os09t0346400-01	chromosome09	11458969	+	Os09t0346400-01
Os09circ07449	HWI-ST620_0173:6:2106:12151:130321#0/1_A_CCCGTACTTGCTTAGCTCTGCCTCTAGATCGGCGTCCGTGGTCCACCAGTGGAGCTCCAGCTGCAACACCACCTCTACCACCCTTCTGCACACCCGAGTT	chromosome09	18950355	18950676	minus	AC	CT	4	2	0	0	6	null	null	ncRNA-ncRNA	null	null	null	null	null	null	null	null
Os09circ09377	HWI-ST620_0166:6:2205:10228:71036#0/1_A_TGGCGCATTATGAATGACCAGAATAATACTAGCATTATGCAGTGACAGGGCCCTCTGCATTGCTACGTCCATTGAGCTGCTCTGGGTGGATCTTCTTCCC	chromosome09	21617396	21620536	minus	AC	CT	1	0	4	1	6	null	null	intergenic-3utr	null	null	null	null	null	null	null	null
Os09circ09893	HWI-ST620_0167:4:2304:5954:80007#0/2_A_TGGAAGCATGCCAGGACGTCTCATTGATGGACTAAAGAGAGTATCGGCGTCTAAGAAAGATGCAACCTCAGCAACCTGGATATAGCAGCTCTCGAACCTA	chromosome09	21832979	21833676	minus	AC	CT	6	0	0	0	6	null	null	intergenic-intergenic	null	null	null	null	null	null	null	null
Os09circ09954	HWI-ST620_0167:4:1206:5380:96964#0/2_A_GAACGCCAAGGAGCGCCCCACCATGTCCGAGGTCGTCCAAGAGCAAGGAATCGTCGGGGAGGCGGGGCTCGACGACGACGACGGTGTCGGCGGTGAGCAC	chromosome09	21846583	21851389	minus	AC	CT	6	0	0	0	6	Tc1/Mariner	null	cds-cds	null	null	null	null	null	null	null	null
Os09circ11137	HWI-ST620_0171:1:1203:10726:69418#0/2_A_GCAAGTGCTGAAGGATTTTAAAAATACTGGGTCAAAGGCGATCGGTGTGATGTATCCAGGGATGTCATTCCCTTTGTTAGTGAACAAAGAAAAGATAGGG	chromosome09	23292735	23295667	minus	AC	CT	0	0	1	5	6	null	null	cds-cds	chromosome09	23292735	-	Os09t0563800-01	chromosome09	23295667	-	Os09t0563800-01
Os09circ11138	HWI-ST620_0177:6:2102:8445:183297#0/2_A_TTTGATGAGTTGGTCCCTCACAACAGATGTGGTTCAACAGTTATGACTGACATAACAACCACCCAGATCGGTGTGATGTATCCAGGGATGTCATTCCCTT	chromosome09	23294736	23295667	minus	AC	CT	0	0	2	4	6	null	null	cds-cds	chromosome09	23294736	-	Os09t0563800-01	chromosome09	23295667	-	Os09t0563800-01
Os10circ03422	HWI-ST620_0177:6:2107:13388:190880#0/2_A_CAAGGATGCGTACCCAACTGTAATGGAAGATTTGCAGATGGATCTCAAGGATAGCCTCTCCAAATTTAAGCAGCAGCAAGAGAGGTGCCAATCATCTTTG	chromosome10	13851662	13853368	minus	AC	CT	0	1	4	1	6	PIF/Harbinger	null	cds-cds	chromosome10	13851662	-	Os10t0397200-01	chromosome10	13853368	-	Os10t0397200-01
Os10circ08830	HWI-ST620_0173:6:1204:1221:149491#0/1_A_CGATATCGCCTCGTATAGCCTGAACCCTAGCTCTCTTACCTCTGTGCAGTACGTGCCGATGATCTCCCTGAAGTTGGTCGCCAATGTTGATGACGAGAGC	chromosome10	21387730	21388054	plus	AG	GT	4	0	2	0	6	Tc1/Mariner	PIF/Harbinger	cds-intron	chromosome10	21387730	+	Os10t0536400-01	null	null	null	null
Os11circ04421	HWI-ST620_0171:5:2301:12400:165399#0/2_A_CATACAACAAGATCAATTGGAACAATGCTCGCATTTCTTGTTGCAAGTTTGCAAAAGAGAACCAAGTTTACAGTAAACATGAAGTAAGCAATCTTAAAGA	chromosome11	10407590	10410958	minus	AC	CT	0	0	0	6	6	null	PIF/Harbinger	cds-cds	chromosome11	10407590	-	Os11t0286800-03	null	null	null	null
Os11circ00243	HWI-ST620_0166:8:1108:2946:133169#0/1_A_CACTGGAGTTTGGACGCTCCTCATCTTTACTCACTTGGCCGCGTGTTCCATGGTATACTCGCCGATCTCAGCTGCCTCGCCACCGCAGCGCAGCCACAGG	chromosome11	1824718	1825303	minus	AC	CT	0	0	3	3	6	null	null	intergenic-cds	null	null	null	null	null	null	null	null
Os11circ10041	HWI-ST620_0167:6:1104:15285:123458#0/1_A_CTCTGACTTGTACTTCTCGGCCTCCTGGACCATCTTCTCAATCTCCTCGATCTTGGGGCCAGCACCGCTGCCGCCAGCCGGGGGAGCATCGTCCTCGTCC	chromosome11	31007389	31007769	plus	AG	GT	3	3	0	0	6	null	null	cds-cds	null	null	null	null	null	null	null	null
Os12circ05157	HWI-ST620_0166:7:2204:6547:181323#0/1_A_GTCGCAACTGACACCAGTATCATGATTAATGGCACTGGACTTGTCCTTGATTTCTCGAAATTCCTTCAGCCAAATGAACATCTCTGGTTTGACATCCAAA	chromosome12	11924761	11925180	plus	AG	GT	0	0	3	3	6	null	null	cds-cds	chromosome12	11924761	+	Os12t0299700-01	chromosome12	11925180	+	Os12t0299700-01
Os12circ02549	HWI-ST620_0177:7:1206:17649:112237#0/1_A_GTTCTGTTGTTGCTAGGTTTATATCACTGAAATAGTACTCCACCTTGTTGGCAAACAGCATATCTAGCTTGGCAGATCTATTAGTAGCAGGACTATTGCC	chromosome12	6810225	6811419	minus	AC	CT	0	0	6	0	6	null	null	intergenic-cds	chromosome12	6810225	-	Os12t0225100-01	null	null	null	null
Os03circ12109	HWI-ST620_0166:7:2104:10599:136354#0/2_A_GTCTGATACACCAAAAGTTGCATATGATTATTGCTCCCTTGAGTGCCAGTGGTGTGGTGCTTGATGATCCTGAATCAACTAAGCTTTTGAGTTCAGTAGC	chromosome03	10394829	10399009	plus	AG	GT	0	1	3	1	5	null	null	cds-cds	chromosome03	10394829	+	Os03t0295700-01	chromosome03	10399009	+	Os03t0295700-01
Os07circ06251	HWI-ST620_0219:1:2212:13354:68036#0/2_A_CCCTGCTTCATACCCTAATGTGAATGCGGCATGAATGAAACCTCCACCAGCAAGAGAATCTTCTTCAGCCTTAACCTTATCAATACGCTCTGTGTGCAGCTTTTCTTTCTCTTTATCTTGATCCCTGTCTCTTTCAGCTCTGTCTTTCTC	chromosome07	13086310	13086866	plus	AG	GT	2	3	0	0	5	null	null	cds-cds	chromosome07	13086310	+	Os07t0405100-01	chromosome07	13086866	+	Os07t0405100-01
Os01circ18052	HWI-ST620_0166:6:2306:14764:18228#0/2_A_GCTACTTATATATCCAAAGGAAATGTCGCACTTTCAGTTCTTATGACAACAAGCTGTCAACTATTGTGCAAGGCTGAAGCTAACATATCCAGTAATCTGC	chromosome01	27705211	27706841	plus	AG	GT	0	0	5	0	5	null	null	cds-cds	chromosome01	27705211	+	Os01t0645200-03	chromosome01	27706841	+	Os01t0645200-03
Os07circ13963	HWI-ST620_0166:8:1301:15851:96679#0/2_A_GATTCGTATCAATTTGCGGCTCAACTGAAAAGGCGCGGACGTACAGAAATTTCAGTTTCACTGCTGGCCATTCAACCTTAAGCAGTCAGCAAGTAAGCAT	chromosome07	23547322	23548069	plus	AG	GT	0	0	2	3	5	null	null	intergenic-intergenic	null	null	null	null	null	null	null	null
Os01circ13677	HWI-ST620_0177:8:2207:20282:164482#0/1_A_GTTGATTGGTCTGGAGCGTGCGGTACTCCTTCTCGAGCTCGTTCATCTCCTCCCCAAATACACCGAGGGTAGATTTTCTCAAGTGCATCCTGTTAATCAT	chromosome01	20484771	20486664	plus	AG	GT	2	2	0	1	5	null	null	cds-cds	null	null	null	null	chromosome01	20486664	+	Os01t0526200-01
Os01circ14692	HWI-ST620_0166:6:2101:3817:84075#0/1_A_GGGGCTTTCTGGCCAAAGTGCTCCTTTATCATTTCAACAACAGCCCCTGCAGCTTCAGATTCCACAAAGCATGAAAACCGAGGTTCAACATGCGATGGTA	chromosome01	22791083	22791220	plus	AG	GT	0	0	5	0	5	null	null	cds-cds	chromosome01	22791083	+	Os01t0558850-00	chromosome01	22791220	+	Os01t0558850-00
Os01circ15385	HWI-ST620_0171:6:2203:18832:43006#0/1_A_CGTCATCATTGTCATCGTCACTCCTCAAGCAGCTTATGCGGTCAGGTCAGAGATCTGCCTGCCCATTCACGTTCTCTCCGCTTAAGCTTTGCTTGCATCT	chromosome01	24222433	24223213	minus	AC	CT	0	0	2	3	5	null	null	cds-3utr	null	null	null	null	chromosome01	24223213	-	Os01t0582400-01
Os01circ15675	HWI-ST620_0177:7:1104:15673:42397#0/2_A_GTGTGAGAATGCATGCGTCGCTGGGATGATAAAAACGGCAGCTTTTGATCGCCAGATTGGGGGTAGGAGGAGTAGTAGGTCGAGAGGGGCATAGACCTGG	chromosome01	24588771	24589011	minus	AC	CT	0	0	5	0	5	null	null	cds-intron OR 3utr-intergenic	null	null	null	null	chromosome01	24589011	-	Os01t0588900-01
Os01circ16528	HWI-ST620_0171:2:1301:8563:103480#0/1_A_CAGAGATGGCGGTTCCTCTTGGCCCATACTGAACCGTTGAAGAGGATTAGACGCAGATGCAGCCTATGTTCTTGAAGGTGGTTTGTTTAGGGGGTGACCA	chromosome01	25911955	25913318	minus	AC	CT	0	0	0	5	5	null	null	intergenic-intergenic	null	null	null	null	null	null	null	null
Os01circ02829	HWI-ST620_0177:8:2206:13940:87274#0/1_A_GGAGAAGGCGCGGCAGAGGATGACTGATGTGCCCATGACTGGATAATCTTTCTTCCCACATGGGCAAGTTCGTCGCCCTTGGAGTGGGCATCCTCCACAC	chromosome01	3088763	3089390	minus	AC	CT	1	4	0	0	5	null	null	cds-cds	null	null	null	null	null	null	null	null
Os01circ25082	HWI-ST620_0166:6:2107:11908:154357#0/2_A_CTGTATTATGAGGATGTTGTCAGCAATGATACTGATACAGTCAACCCAAGCGCGAAGTCTACAAGGAGGTACCCTCTCCTGTCATGGACAACTATATTGG	chromosome01	34975144	34977500	plus	AG	GT	0	0	2	3	5	null	null	cds-cds	chromosome01	34975144	+	Os01t0784600-01	null	null	null	null
Os01circ27772	HWI-ST620_0167:7:1105:8391:173253#0/2_A_TATTTCATGAGTGCTGCAACAGAGGTGGTCCAGGGATGAAACAAAGGAGTTGATAAACAAGGCATGGAATGAGGCTGATATTATAGAGGTGTCAAGGGAT	chromosome01	38372085	38372723	plus	AG	GT	4	1	0	0	5	null	null	cds-3utr	null	null	null	null	null	null	null	null
Os01circ00714	HWI-ST620_0166:8:1307:13894:123561#0/1_A_TCTGTATGTAATCCTCCCGCATTGGCTGTGGGGTTTGAAGTACCAAATTGTCTGAGAATTCACCTCTACCAGAACCATCTTGTTGTGAAGCAACAGCTGC	chromosome01	384580	384923	minus	AC	CT	2	0	3	0	5	null	null	cds-cds OR 5utr-5utr	chromosome01	384580	-	Os01t0107000-01	chromosome01	384923	-	Os01t0107000-01
Os01circ30244	HWI-ST620_0171:4:2205:15096:131678#0/2_A_CGCCGCAGCGGAGCAGCCACAGCAGGCGAGCGACATTGGAGGGTTTGTCAAGACCCAGAAGACCCATGCCTACTTCAAGCGATTCCAAGTCAAGTTCAAG	chromosome01	40698784	40703424	plus	AG	GT	0	5	0	0	5	null	null	intergenic-cds	null	null	null	null	chromosome01	40703424	+	Os01t0896800-01
Os01circ30331	HWI-ST620_0167:4:1201:3238:125951#0/1_A_GGCACTTACAAACTCTGGTGATGCAGGCTCATCACAAGGGAAGGGACTAGGTTGATAGTATGAAGCTGATGCAGCTACACCATCAGTATTTATCATTGAC	chromosome01	40758993	40759388	minus	AC	CT	3	2	0	0	5	null	null	cds-cds	null	null	null	null	null	null	null	null
Os01circ31943	HWI-ST620_0167:5:2305:11988:38425#0/1_A_GGGATCAATTTCTTCAGAGCCGACATTGCTGGAGCCAGAGGCAGATGTCGATGACTCCACGGCACTGGTGGTACACGCCTAGAAGCACGGGTTTGGATCA	chromosome01	42005713	42006185	plus	AG	GT	4	1	0	0	5	null	null	cds-cds	null	null	null	null	null	null	null	null
Os01circ33509	HWI-ST620_0171:6:2207:9902:127427#0/1_A_GAGAAGAATGGCGTGGATGTGGAAGGTAGGTTTCGAGGCCTAATAATCTGCGCGTTGGTCTCCAAGATGTGAGCTCCGATGGATGAGAAGGCCTCGGCGC	chromosome01	43489512	43489822	minus	AC	CT	0	1	0	4	5	null	null	5utr-5utr OR intergenic-cds	chromosome01	43489512	-	Os01t0948400-01	chromosome01	43489822	-	Os01t0948400-01
Os02circ12310	HWI-ST620_0171:2:1302:11437:24483#0/2_A_CTCTTCCACAGTACAGCGATCAAATTGAGAAGCTTTCTCTTCATGTTGAGGGTTTCACCACTGACCATGAAAGAGCATTGGAGGAGCTTTTTAGTGAAAA	chromosome02	15698799	15702533	minus	AC	CT	0	0	2	3	5	null	null	cds-cds	chromosome02	15698799	-	Os02t0452500-01	chromosome02	15702533	-	Os02t0452500-01
Os02circ15136	HWI-ST620_0167:4:1108:7327:13871#0/2_A_CTTTAAAGACTACGCTGAAGCTCATGCTAAACTGAGCGACCTTGGTGCAAAGTTCGATCCACCTGAGGGAGGTATTCTACAGGATGGGCCTTGATGACAA	chromosome02	21696573	21697853	minus	AC	CT	5	0	0	0	5	null	null	cds-cds	chromosome02	21696573	-	Os02t0553200-01	null	null	null	null
Os02circ18892	HWI-ST620_0171:4:1202:15219:193519#0/1_A_TGTCCATCTGCATTTGTGGCATCCGCCTGGTTGACCATGTATCATTACTCTCTTCCATAGTGCTACCATATGGAGACCTTTGTTCATCCAGTGAACGTAC	chromosome02	25319981	25320646	minus	AC	CT	0	5	0	0	5	null	null	5utr-cds OR cds-3utr	null	null	null	null	null	null	null	null
Os02circ08933	HWI-ST620_0171:3:2208:2228:168090#0/1_A_GTGGTCTGTCGGGACAGCAACGGGCTGTGGACATTGTCTTCATAGTCACCAATCCAGAATGTCAGGGCGCAGATGGCAATGCAGATGCCGCGGACCCTAG	chromosome02	7305465	7306635	plus	AG	GT	1	4	0	0	5	null	null	cds-cds	null	null	null	null	null	null	null	null
Os02circ09513	HWI-ST620_0171:8:1302:17444:132272#0/2_A_TTGTTTACTGCACAAATTCACCCCAACAAAACCATGTTTAACCTTGTCAGGTGAGATAAGACCACAGAGCCAGTCATCGCTATGTCTGAAAGCATATAGA	chromosome02	8556958	8560015	plus	AG	GT	3	2	0	0	5	null	hAT	ncRNA-ncRNA	chromosome02	8556958	+	Os02t0250700-01	chromosome02	8560015	+	Os02t0250700-01
Os03circ12588	HWI-ST620_0173:6:2306:15999:92663#0/2_A_GATGAAGAGCAGCTCTAAGGTGGCCAGTCGGAAGGCAGACCCACCCGTTGCGCGATCTCGTCGACGTAAGTACGAGGATGACGATGACTACTCGGAAGAA	chromosome03	10699980	10700441	plus	AG	GT	5	0	0	0	5	null	null	cds-cds	null	null	null	null	null	null	null	null
Os03circ12740	HWI-ST620_0167:5:2204:14407:192994#0/2_A_GTTTGGTGCAATTTCACCAATTGGCACTTTTGAAAGGCAGGGGATTGACTGTGCAGGGTGTGCTGGATTGCTGTTCACACTATTTTTGCTTTGCATGCAT	chromosome03	10700972	10702282	minus	AC	CT	5	0	0	0	5	null	null	intergenic-intergenic	null	null	null	null	null	null	null	null
Os03circ01706	HWI-ST620_0171:8:2204:9300:84318#0/1_A_GTGATAATTTCGTTCCACATCTGTGCAAATCTTGCGGCTATCTTCTCTATCCAGGCATCTGTGAATTGTACGGGAAACTTGATAGCTCCAGCCGGTTGAA	chromosome03	1587683	1589589	minus	AC	CT	0	4	0	1	5	null	Mutator	intergenic-intergenic	null	null	null	null	null	null	null	null
Os03circ01707	HWI-ST620_0173:6:1203:3452:156563#0/1_A_CTCGAAAGCTCGTGATAATTTCGTTCCACATCTGTGCAAATCTTGCGGCTATCTTCTCCAAATATTTTACCAATTCAACAAACTTATTGTAAAGATCTGG	chromosome03	1588854	1589595	minus	AC	CT	3	2	0	0	5	null	Mutator	intergenic-intergenic	null	null	null	null	null	null	null	null
Os03circ02477	HWI-ST620_0171:3:1201:2976:25785#0/1_A_CGGCGTACTGGTCACAGATGTAACGGCAAATAGCCCTCGACTCGAAGACGGTGGTGAGGCTGTCTTTGAATGCGGGAACTCATCACCTGCAAAATACTGG	chromosome03	1954079	1954714	minus	AC	CT	3	2	0	0	5	null	PIF/Harbinger	cds-cds	null	null	null	null	null	null	null	null
Os03circ22679	HWI-ST620_0166:6:2101:10923:86168#0/2_A_CAGGTATAAACGTATCCACTTCAACAAATGTCTCCAGTTGGCAAGGCAGCGACAATTCACAGGTTTTTGATTTTGATCGGGATTACAAAGACATTGGTGT	chromosome03	27917413	27918749	plus	AG	GT	0	0	5	0	5	null	null	intergenic-intergenic	null	null	null	null	null	null	null	null
Os03circ26899	HWI-ST620_0166:6:1104:12877:70119#0/2_A_GCTTCGAACTGCAAGGAACTGGCAGTACAACCTGATCTTAATGGTTTTCTTGTCAGTGGAGCTTCATTGAAGATGTGGTCTCCATGCGGTCGGGGTGAGG	chromosome03	31906813	31908311	plus	AG	GT	0	0	5	0	5	hAT	null	3utr-3utr	chromosome03	31906813	+	Os03t0754200-02	null	null	null	null
Os03circ04080	HWI-ST620_0167:5:1102:3114:54762#0/2_A_CCTGTCTGGACGCCGTACAACCGTCCCCATGACCATCTGCTAGCTAGAAAGGAGTATGGATGACAGTGAAGAGGACCAGAGGCTTCCTCATCATCGTGAG	chromosome03	3338393	3339426	plus	AG	GT	5	0	0	0	5	null	null	cds-cds	null	null	null	null	chromosome03	3339426	+	Os03t0161800-01
Os03circ29345	HWI-ST620_0177:8:1208:5682:21748#0/1_A_CAAACCGAACAACTGGTGGTTTGTTGGGATAATCTTCTGTAAATTGTAGTGTCAGCTTGAAGATTTTTTATGTTTTTAGTAGGTGATACAGACCGGGAAA	chromosome03	33828965	33829960	plus	AG	GT	0	5	0	0	5	null	null	intergenic-3utr	null	null	null	null	null	null	null	null
Os03circ31325	HWI-ST620_0171:5:2305:18467:165794#0/2_A_CAGTATTTAAAGTTGACGATCTTGGAAGGCGTCCACTACTTATAGGAGGCATTGGTGGAATAGTGCGGACACATGCGCAGGGCGGCGAGGCGCCCTCCAG	chromosome03	35454283	35458584	minus	AC	CT	1	0	1	3	5	null	null	intergenic-cds	chromosome03	35454283	-	Os03t0823100-01	null	null	null	null
Os03circ05427	HWI-ST620_0171:7:1104:13219:97863#0/1_A_CGGGGGGGCCTGGCCGGAGGCGACGGGGGCGGAGGAGACGCCGGAGAAGTAGTATGACCTGTAGCTCGGGAGGCAGTAGGAGAAGACGCCATTGTACAAG	chromosome03	4540598	4541155	minus	AC	CT	0	5	0	0	5	Tc1/Mariner	null	intergenic-intergenic	null	null	null	null	null	null	null	null
Os03circ06497	HWI-ST620_0171:4:1201:6619:39101#0/1_A_GCTTCTTCTTGTAATTATCTTCTTCCTCATACCTTCCACCACCTCCATATCCACCCGCACCGGCACTCGGCTTCTTCATGTAATCATCTTCTTCTTCCTC	chromosome03	5823470	5823736	minus	AC	CT	2	3	0	0	5	null	null	cds-cds	null	null	null	null	null	null	null	null
Os03circ07485	HWI-ST620_0171:4:1302:14789:112902#0/1_A_GGCGTCGCGGCGGAGGTTCAGCGTAGCGTAGTAGTCCTTCCCTTTGCCATCACAATTTAAGCAAGTAGATATCTGAGATACTATACCAAAAGGTGTCCTC	chromosome03	6470033	6472930	plus	AG	GT	3	2	0	0	5	null	null	cds-5utr-acrossGene	null	null	null	null	null	null	null	null
Os03circ09587	HWI-ST620_0167:5:2304:16957:52863#0/2_A_GGTGAGGAGGAAGCAGAGGAGTTGCAAGAAGGAGAAGGGAGCGCAGAGGAGGCTGCTCAAGATGAGGCGGCAGGAAGCCCTACCAGCAGAAGAAGACGGG	chromosome03	8802024	8802595	plus	AG	GT	4	1	0	0	5	null	null	cds-cds	null	null	null	null	chromosome03	8802595	+	Os03t0265400-01
Os03circ09936	HWI-ST620_0167:4:2203:21200:16162#0/2_A_TTGCTGCCAGGAAACAGCGCGTCTGATATTCGTAAACAATGTGGGGACAAACATAAGGAAACCTACTACTGAGTATTCTGCAGACGAATACTCATTTTTG	chromosome03	8986622	8988060	minus	AC	CT	5	0	0	0	5	null	null	cds-3utr-acrossGene	null	null	null	null	chromosome03	8988060	-	Os03t0268900-01
Os04circ03139	HWI-ST620_0166:6:2201:10789:73756#0/1_A_GGTCGCTTACGCTTAAGGCGTGCACAAACCAGAGATTTTCCATCAGGCATAGACATAATCTTATATTCTCACAGAAATGAGCTGATTTAGCTCTATCCAC	chromosome04	17092125	17093521	minus	AC	CT	1	0	1	3	5	null	null	5utr-cds OR intergenic-3utr	null	null	null	null	null	null	null	null
Os04circ12519	HWI-ST620_0167:4:2103:5642:36868#0/1_A_TGGGGAACTTTCGAGGCTTCTTTCTCTTGAGCATCTTTCTCTGATTGAAGGTTTTCAAGTACTATCTGTTGCTTAGGATTTGGCGGGAGAGTCTTCATGT	chromosome04	30577304	30578103	plus	AG	GT	5	0	0	0	5	null	null	intergenic-intergenic	null	null	null	null	null	null	null	null
Os04circ13982	HWI-ST620_0167:4:2303:5805:73245#0/1_A_TCCCCTGTTTTGTTTTATTAGAAGTGTCCTGACTCTTCTGCATATCACCATCAGCTATTACACTGCCCAAAAGAAAGAAGGCCGTAGATTAAATTGTAGT	chromosome04	32006139	32006600	minus	AC	CT	3	2	0	0	5	null	null	intergenic-intergenic	null	null	null	null	null	null	null	null
Os04circ14059	HWI-ST620_0177:6:1102:15811:9647#0/2_A_CCAGTCAAAAGTGCAGGACATCCGTGATGATGAAATTTCATGGTTCCGCAGCGCTCAATTGCTTGCTGCGATCGCAGCTGTTTTCCGTAAGTCTTTGCGA	chromosome04	32009569	32010923	minus	AC	CT	0	0	5	0	5	null	null	intergenic-intergenic	null	null	null	null	null	null	null	null
Os04circ15059	HWI-ST620_0171:3:1307:9264:197777#0/2_A_GTCTTCTGTCTCGCGCTGTTGCCAAAACCCTCAGAAGAATCTTCATATGAAGATAGAGCATAAAGATCCACATCCTGGAAATCTTTTGCGTACAGTTGAT	chromosome04	33077236	33080577	plus	AG	GT	1	1	1	2	5	null	null	cds-3utr	null	null	null	null	null	null	null	null
Os04circ15180	HWI-ST620_0171:2:1301:19932:91032#0/1_A_GACCAACTCTGATTTATAGTCTGAAACATCCGTCATGGTATCTCCTGCATACATAGCTAATGGATCATTTATCTTTTCACCTATCTTGTAAGCTGCTGAT	chromosome04	33236080	33237198	minus	AC	CT	0	0	1	4	5	null	null	cds-cds	chromosome04	33236080	-	Os04t0643200-00	chromosome04	33237198	-	Os04t0643200-00
Os05circ01206	HWI-ST620_0173:6:1102:19123:189058#0/1_A_GGTGCGGCGGCGGCGAGGGGGTGGCCTCCTCCTCTGATGGCTTCCTCTTCTGATCCGATGATCTGGATGCATCCTCATTATTTGGGAATAGGGGATGAGG	chromosome05	1156545	1159447	minus	AC	CT	5	0	0	0	5	self-complementation	self-complementation	intron-intron	null	null	null	null	null	null	null	null
Os05circ07925	HWI-ST620_0173:6:2301:7174:88335#0/1_A_GGAGCAGCCGTTGTAGGTGCACTTGTAGTAGCTCCTTGGGTTGGGGTTGCCCTTGACGACCTTCTGGCCGTACTTCCTCCACCGGAAGCCGTCGTCGAGG	chromosome05	16180232	16180816	plus	AG	GT	5	0	0	0	5	null	null	cds-cds	null	null	null	null	chromosome05	16180816	+	Os05t0343400-01
Os05circ11106	HWI-ST620_0177:8:2302:1628:46101#0/1_A_TGTAGCTATAAAATAAAAAGGGAAGGTAATAGCTGGGTTTGCAGTATGTTCAGCTCATCATCAGCTCAGGCATCGAATTTCCAGATGTCGCGATCTCCGA	chromosome05	20627332	20631464	plus	AG	GT	2	3	0	0	5	null	PIF/Harbinger	intergenic-intergenic	null	null	null	null	null	null	null	null
Os05circ11888	HWI-ST620_0167:5:2108:11820:187713#0/2_A_CCTGAGTCTAGCAATACAAGACCGAGAGATGTAATAATAACCCGTATTGGAGGATTCATGGACCCAAATAAGATCCCAGATGTATGTGTTCAAGATGACA	chromosome05	22042040	22042525	minus	AC	CT	5	0	0	0	5	null	null	intergenic-intergenic	null	null	null	null	null	null	null	null
Os05circ02506	HWI-ST620_0166:6:2302:12413:39887#0/2_A_GATTATATTGCAACAAGGTGGTACCGAGCACCAGAGCTGTGTGGATCTTTTTTCTCCAAGACACCTTCTGAGATGGATTTTTTCACCGAGTACGGTGAGG	chromosome05	2512802	2514810	plus	AG	GT	0	0	5	0	5	null	null	5utr-5utr OR intergenic-cds	chromosome05	2512802	+	Os05t0143500-01	chromosome05	2514810	+	Os05t0143500-01
Os05circ16639	HWI-ST620_0177:8:1306:16245:11694#0/1_A_GCGAGGGTTCCCGAAGCTTCGGGTGGTAGGTTTAGTGTTCTTTGAGCCCTTCTTTGGTTTCTTCTTGAGAACCTTTTGTGTCAAACACTTCCCAGGGAAC	chromosome05	26907093	26909365	plus	AG	GT	0	5	0	0	5	null	null	ncRNA-intergenic	null	null	null	null	null	null	null	null
Os06circ02026	HWI-ST620_0166:6:2106:17760:121443#0/2_A_GCTGGATCTCGCAGCAGCAGCACCACACCACCTATGGCCTATCTGAAAGCCTGAAAAGATCAAATTCTTGAGATGCCATCACAACTGAAACTGAACACAC	chromosome06	1595189	1595902	plus	AG	GT	2	0	3	0	5	null	null	3utr-3utr	chromosome06	1595189	+	Os06t0130000-02	chromosome06	1595902	+	Os06t0130000-02
Os06circ10500	HWI-ST620_0166:7:1304:8707:17034#0/2_A_CCACCGACAGCTTCTCCAAGGCCAACAAGCTCGGCGAGGGCGGCTTCGGCCCCGTCTACAGGCTGTGAGGAGGGCGCAGATGGAGAGGCTTCGGCCGATG	chromosome06	18255947	18256092	plus	AG	GT	0	0	2	3	5	null	null	cds-cds	chromosome06	18255947	+	Os06t0496800-01	chromosome06	18256092	+	Os06t0496800-01
Os06circ15558	HWI-ST620_0166:7:1103:11387:116023#0/1_A_GCAAGCACAGCACCACGTCCTCCCTCCTGAAGTACAGGGTCGGGTTCTCCCCGTCCACCTTTCATGATTTGTTCTCCCCGGATGCAAATCTCCCCGGACT	chromosome06	27824007	27825517	minus	AC	CT	0	0	5	0	5	PIF/Harbinger	null	cds-cds	chromosome06	27824007	-	Os06t0656500-01	chromosome06	27825517	-	Os06t0656500-01
Os06circ19417	HWI-ST620_0171:3:2102:14707:72436#0/1_A_GCCTTGGCTACATAGGGAGCCTTGTCCGCTTCGGTCAGGGATTTCATCCTCTTCGCTGCCCTCGTCGTCATCCTCATCATTGACCTCGGACTTGGACTTG	chromosome06	31871112	31871511	plus	AG	GT	4	1	0	0	5	null	null	cds-cds	null	null	null	null	chromosome06	31871511	+	Os06t0728000-02
Os06circ00490	HWI-ST620_0167:5:1105:10116:52075#0/2_A_TGGAGGTGTTACATATTCAGCTGAATTTGCATCGAGCATTCTGAAAGGAAGTGGAGACTGGGAAGGTGGGAAACACGCTCCTCTGGTTCAAGTGACCGCG	chromosome06	403747	405456	plus	AG	GT	4	1	0	0	5	null	null	cds-cds	null	null	null	null	null	null	null	null
Os06circ01230	HWI-ST620_0167:5:2301:10023:98180#0/1_A_CTCTCAACTTCTTCTCTTTTAGTTCGGTCTCTGTTTGTGCTCCCACCTTCTGCTCATCATTCTCCAGGTTGTCCTTGATGGCGTCAACTCTAGCTGCCAG	chromosome06	811410	811732	minus	AC	CT	5	0	0	0	5	null	null	cds-cds	chromosome06	811410	-	Os06t0114000-02	chromosome06	811732	-	Os06t0114000-02
Os06circ01428	HWI-ST620_0167:6:1303:18770:58886#0/1_A_CAATATTTTCAACAGGATCCTCCAGTTCAACCTCTCTTGCAACTGTAACACCATCATTGACAATCCTAGGGGACCCATACTTGCTCATAGCCTCTGCTAT	chromosome06	812985	814061	minus	AC	CT	2	3	0	0	5	null	null	cds-cds	null	null	null	null	null	null	null	null
Os07circ09637	HWI-ST620_0167:7:2203:14722:110162#0/1_A_GATCTCCTGGTTCATGTTGTAGAGCACCTCGGGTGAGAAGGGCTGCGTCTCGATCTTCACCTTCTCCCGCTCCACGGTCAGCTTCCCTTCCTTGGTGGTG	chromosome07	20316744	20317313	minus	AC	CT	3	2	0	0	5	null	null	cds-cds	null	null	null	null	null	null	null	null
Os07circ11141	HWI-ST620_0177:8:2305:11247:66438#0/1_A_GTGGGGTTGCGGGCGGCGGCGGGGAGGCGCGCGCCAGCGAAGGAGGTCTTGAGGAGGCTGGACGAGCGCCTTCAGCGCCAGGTGCGCCGCCTTCTGGCCG	chromosome07	21384815	21385829	minus	AC	CT	2	3	0	0	5	PIF/Harbinger || hAT	null	intergenic-intergenic	null	null	null	null	null	null	null	null
Os07circ13974	HWI-ST620_0167:5:1302:3563:10322#0/1_A_CGACCTCGGCGATCTGCCACGCGGCGATCTTGGACTCCACCTCCTCCTTCTTCACCTGCCCCACCGACACCTAGTTCTGCGCCTTCTCCATCGCCTTGGC	chromosome07	23550045	23550359	minus	AC	CT	4	0	1	0	5	null	null	cds-cds	null	null	null	null	null	null	null	null
Os07circ14143	HWI-ST620_0173:6:2302:9515:80893#0/2_A_GAGGGCGACCAGGTCGAGAAGGCCAACGCCTGGCTCAAGAAGTACGAGAGGGAGGAGGAGGTGGTGGTGGAGGAGGAGCTCGAGGAGCCGGAGTTCAGGG	chromosome07	23550192	23550830	minus	AC	CT	5	0	0	0	5	null	null	cds-cds	chromosome07	23550192	-	Os07t0569100-01	null	null	null	null
Os07circ14317	HWI-ST620_0167:6:2203:15845:51882#0/1_A_GTGGAGCACCGTGCTTGTGGCCTTGTAAGTGAAGTAATTCATGATTTCCGTGTGCACGTCTTCGAACCCCTCCTTTGCGAGTGCGATGAGGAAATGTTTG	chromosome07	23586371	23586853	minus	AC	CT	5	0	0	0	5	null	null	cds-cds	chromosome07	23586371	-	Os07t0569600-01	null	null	null	null
Os07circ01798	HWI-ST620_0167:7:1205:4288:175307#0/1_A_TGGTGTTCAAGGAAGGTGTTGATGCATCTGGAAGGGTAGCCAAGGGAAAGGGACAATGGCAAGGCCATCTTTGATCATAGTGGCCAAGAAAGCAAAGAAG	chromosome07	2486632	2486994	plus	AG	GT	5	0	0	0	5	null	null	cds-cds	null	null	null	null	chromosome07	2486994	+	Os07t0147500-01
Os07circ18271	HWI-ST620_0166:6:2208:5474:89369#0/1_A_GTCGCGGAAAGAGTCCAAGTACCAATCCCGCACCGTATCCTTCCATAGAGATGATTTGCAGGTCACCACCAAAATATCGAGCATACAGGCGACTGATTGG	chromosome07	27142311	27144283	minus	AC	CT	0	0	4	1	5	null	null	cds-cds	chromosome07	27142311	-	Os07t0637300-01	chromosome07	27144283	-	Os07t0637300-01
Os07circ02765	HWI-ST620_0167:5:2202:2449:128159#0/2_A_TTGGTGTATTAGTAGGCAACTGTGGTGGGGTCATCGGATCCCTGTTTGGTACATCGTTGGAAAGAAAAGTACGGGAGCACTATCACTAATCAGATTAAGC	chromosome07	3423063	3427049	plus	AG	GT	5	0	0	0	5	null	null	intergenic-intergenic	null	null	null	null	null	null	null	null
Os08circ06477	HWI-ST620_0173:6:1307:14507:36980#0/1_A_GGGATTTTCGGGGGTAATTTTGCGGATTTTTTTTTTGGTTTTTTACATACACATTGTTAAATTTGGGATTGCCTGATACATTTTCCCTCTCCTGTTTACG	chromosome08	13559850	13561442	minus	AC	CT	1	4	0	0	5	PIF/Harbinger	null	intergenic-intergenic	null	null	null	null	null	null	null	null
Os08circ07501	HWI-ST620_0166:7:2201:8923:82569#0/1_A_GCAGTCTTTCCTTGCATCCAGCATGCTTTTGTCCTCTTTCTTTCAGAGCTGAGTATCCCAGTGCTGAACTGCTGATGGTTTTTTTAGATGATGGGAATTT	chromosome08	16427953	16428296	minus	AC	CT	0	0	5	0	5	Tc1/Mariner	null	intergenic-intergenic	null	null	null	null	null	null	null	null
Os08circ08190	HWI-ST620_0167:4:1303:4441:126493#0/1_A_GGGTGGAGAAGCTCTGGGAGAATTGTGTTGGGAAGAAGAGGTTCCAGATGCCGTAGAAGAAGGAGGAGACGATGGAGGCGATGTTGTAGCTCGGGGTGAG	chromosome08	18217493	18218243	plus	AG	GT	5	0	0	0	5	hAT	null	intergenic-intergenic	null	null	null	null	null	null	null	null
Os08circ13404	HWI-ST620_0171:5:1303:16936:53920#0/1_A_CTCCTCCTTGAGCCGTTTCACTTTTGATTGCAACGACCTGGCTATCGAGCCGCCGCTCGAACACGGCGCCGGCCTTGCTGGTCCGGACCGACTCGAGGAA	chromosome08	25416040	25416610	minus	AC	CT	1	0	3	1	5	null	null	cds-cds	chromosome08	25416040	-	Os08t0510700-01	chromosome08	25416610	-	Os08t0510700-01
Os08circ16101	HWI-ST620_0167:5:1205:4507:64226#0/1_A_GGGCTGGCTTCTTCTCCTCCGTCGATTATGAGAGAAGAAGAAGAAGAAGAAGAAGTCTAGATGTCGAAGACGTTCTTGCCGGTGAACTTGACCTCGATGG	chromosome08	28171531	28172023	plus	AG	GT	4	1	0	0	5	PIF/Harbinger	null	intergenic-intergenic	null	null	null	null	null	null	null	null
Os08circ16133	HWI-ST620_0177:8:2101:17615:200248#0/1_A_GGTGGGTGCCCTCGAGGTGGGCATGGAGAGGGTCGATTATGAGAGAAGAAGAAGAAGAAGAAGAAGTCTAGATGTCGAAGACGTTCTTGCCGGTGAACTT	chromosome08	28171531	28172098	plus	AG	GT	1	4	0	0	5	PIF/Harbinger	null	intergenic-intergenic	null	null	null	null	null	null	null	null
Os08circ16186	HWI-ST620_0173:6:2205:12068:39415#0/1_A_GGCATGGAGAGGGTGGATGAGCGCGGCTTCGCCGGTGCCCAGGCGGCGAGGAGGTACTGCACCTCGCCATTGGGGAAGACGCGGTAGAACTGGTAGTTGA	chromosome08	28171705	28172139	plus	AG	GT	5	0	0	0	5	PIF/Harbinger	PIF/Harbinger	intergenic-intergenic	null	null	null	null	null	null	null	null
Os08circ16234	HWI-ST620_0167:6:1301:20503:162851#0/2_A_CTTCGACATCTAGACTTCTTCTTCTTCTTCTTCTTCTCTCCTCCTCCGACCACCATGGCCATGGACACGCAAGCCTCCGCCGCCAAGTGCCACCTCCTCG	chromosome08	28171551	28172203	plus	AG	GT	4	1	0	0	5	PIF/Harbinger	PIF/Harbinger	intergenic-intergenic	null	null	null	null	null	null	null	null
Os08circ05383	HWI-ST620_0167:7:1306:5942:173330#0/1_A_GGGGGCTTCCTGTATTTATCTGCCTAGTAACTGCCCTCCTCTGTCGTCGGCCTCCAAGCTTTTGATAAATGGTTTGCATATTTCAAGAATAATTTTGATG	chromosome08	8668242	8668380	minus	AC	CT	4	1	0	0	5	null	null	3utr-3utr OR cds-intergenic	null	null	null	null	null	null	null	null
Os08circ05425	HWI-ST620_0173:6:1106:8427:14636#0/1_A_GTTGGGTCTCAGCTGCACGGAGGAGGTGGAGATGGAGGTGGTGGGCTTCCTGTATTTATCTGCCTAGTAACTGCCCTCCTCTGTCGTCGGCCTCCTCAAG	chromosome08	8668327	8671757	plus	AG	GT	3	2	0	0	5	null	null	intergenic-intergenic	null	null	null	null	null	null	null	null
Os09circ04181	HWI-ST620_0173:6:2106:12058:24243#0/2_A_GGCTTCTTCTATTGGAGGAGGTAAATCGAATCACAAGATTTTTGTTGGTTTTTTGTGTGGCTTTGAAGCATATTAGGAGGCGGCGGCGGAAGGGAGGGCA	chromosome09	14225666	14226289	minus	AC	CT	5	0	0	0	5	Tc1/Mariner	null	3utr-intron-acrossGene	null	null	null	null	null	null	null	null
Os09circ04467	HWI-ST620_0166:6:2102:10363:99996#0/1_A_GCTCGCGAACGACCAATCCATCGCCGCCGCTGCCGCTCCTCCTCCTGCTCCAAAGTAATCTTTCCTTTCGCTTCTCCAAGAATCGGGCAAGGGATGCCTT	chromosome09	14764154	14765564	minus	AC	CT	0	0	5	0	5	Mutator	null	cds-cds	chromosome09	14764154	-	Os09t0401300-02	chromosome09	14765564	-	Os09t0401300-01
Os09circ05531	HWI-ST620_0166:8:1204:3832:24088#0/2_A_CTTGGATAATATTCATTGTTCTTGGTTGTGACTTTAAAAAAAAACAGACTTCTCGTTGTTCGTGGTTGTGAGTTCATTGTCTGTGATGTTGATTCGGGTT	chromosome09	16418153	16418252	minus	AC	CT	3	0	2	0	5	null	null	intergenic-intergenic	null	null	null	null	null	null	null	null
Os09circ06027	HWI-ST620_0166:6:1104:2347:39555#0/2_A_CCTTGGCTACTACAGTGCCATTCTGATATCTGGGGTTGCATTTTCTCTTATTCACCGGATCATGGGATTTTCCTTCATGGTATTTGTGCTATGGTCTCCT	chromosome09	16800727	16801373	plus	AG	GT	0	0	5	0	5	null	null	cds-cds	chromosome09	16800727	+	Os09t0436800-01	chromosome09	16801373	+	Os09t0436800-01
Os09circ06057	HWI-ST620_0166:6:2207:12518:86964#0/1_A_CGTCCCAGAGCTGGTCGAGGAGCCCCATGCTGCACGCAGCTTAATTTAGCTAGCTAAGCTAACCCAAGATCACCAGTCGTATACGGTGGGGCTTCTCGGC	chromosome09	16859453	16860025	plus	AG	GT	0	0	3	2	5	null	PIF/Harbinger	5utr-cds	chromosome09	16859453	+	Os09t0437500-01	chromosome09	16860025	+	Os09t0437500-01
Os09circ08109	HWI-ST620_0167:7:2101:16156:188276#0/1_A_GGTGGTCGTCGTCGTCGAGCCAATCCTCCTCCCTATGAACACCAAGACAACCCTGATGATAATCATGTTGAAGCTGCGATTGGGGAACGGATGCTGAGAA	chromosome09	19829819	19830304	minus	AC	CT	4	1	0	0	5	null	null	cds-cds	null	null	null	null	null	null	null	null
Os09circ08734	HWI-ST620_0171:1:2203:12199:57146#0/2_A_CAGTACGAGCAAACTGCAAAAGGCAACTTCGCGGAAATGCCTATTGAAGAATTGATCAAGAGGTTCATATGGCAGTCATTCTGTATAACTATTACCACCG	chromosome09	20739046	20740128	plus	AG	GT	0	0	0	5	5	null	PIF/Harbinger	cds-intron	chromosome09	20739046	+	Os09t0514500-00	null	null	null	null
Os09circ08819	HWI-ST620_0171:1:1102:7053:172466#0/1_A_GCCTACTGTAAAATAACAAATTTTCACAAGAACAAACAGAAAGCTAATGTAAAAAAAGATGACACGAAATCACTTGATTTTCAAGGCGACAGATGGTGGC	chromosome09	20803357	20803730	minus	AC	CT	1	3	0	1	5	null	null	intron-intron	null	null	null	null	null	null	null	null
Os09circ11454	HWI-ST620_0166:6:1206:19479:171239#0/1_A_CTGCTTGTTCGTCTCTGCTGGCTGCATCAAGTCAAGAAACCACCTCCTTCCTCCTTGCGAGGCTGCGATGTGAGCGGAATGGATGCAGCTCTAGCTCCAG	chromosome09	23570801	23571251	plus	AG	GT	0	0	5	0	5	null	null	3utr-3utr	null	null	null	null	chromosome09	23571251	+	Os09t0568000-02
Os09circ01536	HWI-ST620_0171:6:1304:2425:147735#0/2_A_TGGTACCATTTCGATGTGTTTTGATTTTTTCGAAAAAGAGAGGTTTGACAGCCAAGGAGCGGCAAATAAGTAAATATCTTCGACATAGCTGAAGAGAAAA	chromosome09	5311523	5313273	plus	AG	GT	0	0	0	5	5	null	null	intergenic-intergenic	null	null	null	null	null	null	null	null
Os10circ02205	HWI-ST620_0166:6:2207:6647:138313#0/1_A_GACGTTGAGTTGATACCACCACAAAGACCCTTGTCAGAGGTAATGGCTACAATAACATTCTTCTTGACATCGACACTGGGCTAATTATTGCAACTTAGCA	chromosome10	9030965	9034132	plus	AG	GT	1	1	2	1	5	null	null	cds-3utr	chromosome10	9030965	+	Os10t0320400-01	null	null	null	null
Os11circ04410	HWI-ST620_0177:6:1206:5004:51880#0/2_A_CTGGTGGATGGGGAGAGGATTACCTCGGTTGTCAAGTTGAGGTGTACGTTGGTAGCCGGTGCTGGGATACTGCCCTTATAGTTCAGGCCTACTGCTCAAC	chromosome11	10398774	10402957	minus	AC	CT	0	0	1	4	5	null	hAT	cds-cds OR intergenic-3utr	chromosome11	10398774	-	Os11t0286800-04	chromosome11	10402957	-	Os11t0286800-03
Os11circ00226	HWI-ST620_0171:1:2102:15258:158752#0/2_A_TTAAGTCAAATCCTGCTATGGTTCATGGATCAGTCAAGTCATATCAGAACATTTAAACATGATCGTGGTGGCTTTCTTAGGTTTGCTCAGAGCTTTCAAA	chromosome11	1818393	1819087	minus	AC	CT	0	1	1	3	5	null	null	3utr-3utr	null	null	null	null	null	null	null	null
Os11circ00292	HWI-ST620_0166:6:2201:17264:139464#0/2_A_CTTCTTTCCAGTCAGTTCCCTTGGCGAGCTTTTTGATGACATTGCTAAAGCCAACTAGAGGTCTTCGGCTCTTCAGATGCATCGATAGTTGCGGGGTCGG	chromosome11	2074796	2075164	minus	AC	CT	0	0	5	0	5	null	null	5utr-5utr	chromosome11	2074796	-	Os11t0146200-01	chromosome11	2075164	-	Os11t0146200-01
Os11circ06816	HWI-ST620_0166:7:2304:14739:116992#0/2_A_GTGGGGTCTACATCCACTTACCAGATGCGATACAAAATATTTGGGCGATGTTCGGTACTTACAGGTCTTCACATGACGTGCTGTGGACTTTGTGAAGAAT	chromosome11	22273452	22273706	minus	AC	CT	0	0	5	0	5	Tc1/Mariner	Mutator	cds-cds OR 3utr-3utr	chromosome11	22273452	-	Os11t0545000-01	chromosome11	22273706	-	Os11t0545000-01
Os11circ00564	HWI-ST620_0173:6:2107:14313:20569#0/1_A_CCCGCCAATAGGATAACTGTTGGGGCAGTTTTTGCAAACACCAAATCTGATACCTCTTTGATACTTAGTGCTGCTCCACCTCTGGAATCACCATCCAGTT	chromosome11	2500316	2501631	plus	AG	GT	4	1	0	0	5	null	null	cds-cds	null	null	null	null	chromosome11	2501631	+	Os11t0153700-01
Os11circ08046	HWI-ST620_0167:5:2208:7496:127382#0/1_A_GGGGCCAATTATGGCTATCTTTTCACTTCAATAACTCTGTTAACAATTTGCTTTACGAAATACCGGTCATGAGAAACTGTTATAACAGTGCCTGTGTATT	chromosome11	25431548	25432477	plus	AG	GT	5	0	0	0	5	null	null	cds-cds	null	null	null	null	null	null	null	null
Os11circ09427	HWI-ST620_0177:6:1106:20414:115970#0/2_A_CGTGCTAGTGTGTGATGAGTCGTGCGCATCCGGACGTCTGTGAATATTTAATTGATATTATCCCATCATGGACGCGGCAGAGATCCGCAGGTGTCCGTGG	chromosome11	29883405	29884327	minus	AC	CT	0	0	3	2	5	hAT	Mutator	cds-3utr	null	null	null	null	chromosome11	29884327	-	Os11t0684100-01
Os11circ11983	HWI-ST620_0167:4:1105:3992:25727#0/1_A_TGTGCCAACACGGCATCTGATGCATGTGGTACTCCCCAGCAACTCCGTATTTCCATGCACTGCACTGCACTCTCACCAGCTCTTAGTTCTCCTTCCCCTG	chromosome11	31173123	31176418	minus	AC	CT	4	1	0	0	5	null	null	3utr-3utr OR cds-intergenic	null	null	null	null	null	null	null	null
Os11circ02859	HWI-ST620_0166:6:1303:9187:38889#0/2_A_GGAGCAGTACTAGATTATTCATTCATGCCAGGAAGAAGAAATTTTCAGGTTCTTGGGGGTGGAACCGAAGGCGGACATCGAGGAGATAAAGGCGGCGTAC	chromosome11	6047361	6047816	minus	AC	CT	0	0	5	0	5	null	null	cds-cds	null	null	null	null	chromosome11	6047816	-	Os11t0216100-01
Os12circ05110	HWI-ST620_0171:5:2105:17478:117425#0/1_A_CTCGTTCAGAGATTCCTTGATGGACTCCAGTTGCTCAAATAGGCATTACTTTTTCAGGGAATATAGAAAGAAGTGCTTCAGAGTACTCTTCCGTTAATCT	chromosome12	11742132	11745087	minus	AC	CT	0	0	3	2	5	null	PIF/Harbinger	cds-cds	chromosome12	11742132	-	Os12t0297500-01	chromosome12	11745087	-	Os12t0297500-01
Os06circ17726	HWI-ST620_0171:5:2205:13286:123518#0/2_A_CAAAGATCAAAGAAGAAGCAATTCTCTACTGCTGATGCTGTTGCTGTGAGGAGACTCAAATCCTCCTCTCCAGGGTCAACAAAGGAACTCTACAACAAAC	chromosome06	30627381	30627862	plus	AG	GT	0	0	1	3	4	null	PIF/Harbinger	3utr-intergenic	chromosome06	30627381	+	Os06t0704400-02	null	null	null	null
Os01circ17781	HWI-ST620_0177:6:1304:14989:99622#0/1_A_CGATCGGCTCTAGTTTTTGACTTTTTTTTTTCCCTTCCGTTCGCTGGCGGTCGTCGCGGCCTCCCGGATCACTTGGGTGCCTGGCCGGCCTTGAGCGGCT	chromosome01	27429803	27430688	plus	AG	GT	3	0	1	0	4	null	null	intron-ncRNA	null	null	null	null	chromosome01	27430688	+	Os01t0639900-01
Os01circ33404	HWI-ST620_0177:7:2303:2486:69338#0/1_A_CTCCTATCTGCAAAATTTTGGCATCATGGGTTTCCTTTCCTCCGCAAATAAGTGACGCCTTGCCCACCGGCCCCAAAAATTGTTCGCAGATAGCTGCTCC	chromosome01	43281506	43286666	plus	AG	GT	1	0	2	1	4	null	null	5utr-cds	chromosome01	43281506	+	Os01t0944200-01	chromosome01	43286666	+	Os01t0944200-01
Os03circ11007	HWI-ST620_0166:8:1204:3246:96038#0/2_A_TTTGAGTACGATCTTGAGGCCCCGGGCTACGGCGTGTCCGCATTTGCGACGGTTGCCATTGGAAACGAAGTGCCAAAGAATTACAAGTCTTATGTGGATT	chromosome03	9604120	9604912	plus	AG	GT	0	0	4	0	4	null	null	cds-3utr	chromosome03	9604120	+	Os03t0279950-01	chromosome03	9604912	+	Os03t0279950-01
Os04circ07737	HWI-ST620_0166:7:2305:17510:84719#0/1_A_CCTCCGACTTGTTTATAATGTCCCCAGTAATATTGCATATAAGCTTCGACCTTTACTGCTCCTTTTTGGTTTTTTTCTTCCTTGAAGCGAAGCTACTTGG	chromosome04	24526427	24527900	plus	AG	GT	1	0	2	1	4	null	null	cds-3utr	chromosome04	24526427	+	Os04t0480400-01	null	null	null	null
Os04circ18480	HWI-ST620_0166:6:2103:14269:138892#0/1_A_CATCTGCTTCATCAAGTCCTCTGCTTCCCAAACATCACCTCTCCGAGCCCATCTGTGCCAGCCATTGATATGTACAGCTACACGCATAACTGAGTAAGCT	chromosome04	35464324	35465736	plus	AG	GT	0	0	4	0	4	null	null	cds-3utr OR 3utr-intergenic	chromosome04	35464324	+	Os04t0684500-02	chromosome04	35465736	+	Os04t0684500-02
Os04circ18487	HWI-ST620_0166:6:2108:20680:191644#0/2_A_CAGGTGTAATTTCCTCTCTAGTCTCTAGAATTACAAGGCAAGATGGGCTCGGAGAGGTGATGTTTGGGAAGCAGAGGACTTGATGAAGCAGATGAAAGAA	chromosome04	35464324	35469029	plus	AG	GT	0	0	4	0	4	null	null	cds-3utr OR 3utr-intron	chromosome04	35464324	+	Os04t0684500-02	null	null	null	null
Os01circ10593	HWI-ST620_0166:7:1104:16398:39090#0/2_A_GAAACAAACCAGCATATCAATTTGAAAGGATTTATTGTCCTGGTTGCTCATCTGTGGGCTATGGAGCAGCTTCTGAATTGGGTCCTCTCATGGTCAATGG	chromosome01	13060029	13061244	minus	AC	CT	0	0	4	0	4	null	null	cds-cds	chromosome01	13060029	-	Os01t0332800-01	chromosome01	13061244	-	Os01t0332800-01
Os01circ12500	HWI-ST620_0166:8:1106:13097:112634#0/2_A_CCTTCGCCTTCAAGGCCGGCAAGTACAACATGAAGAAGTTCTGCCTGGAGCCGACGACATGGAGGTGAAGGGAACCGGCACGGCGAACCAGTGCCCGACG	chromosome01	18980516	18980634	minus	AC	CT	0	0	4	0	4	null	null	intergenic-intergenic	null	null	null	null	null	null	null	null
Os01circ12765	HWI-ST620_0167:5:1105:4093:191577#0/2_A_CAAGAATCTGGTCGCCACCGGCAAGCCGGAGAGCTTCGGCGGGCCCTTCGACGAGATTCAGAGTAAGACGTACATGGAGGTGAAGGGAACCGGCACGGCG	chromosome01	18980488	18980898	minus	AC	CT	4	0	0	0	4	null	null	intergenic-intergenic	null	null	null	null	null	null	null	null
Os01circ12802	HWI-ST620_0166:7:2302:7124:170818#0/2_A_CACCGGCAAGCCGGAGAGCTTCGGCGGGCCCTTCCTCGTGCCCAGCTACCCTGCCGGGAGGCGAGCGCGTGCCGTTCCTCTTCACCATCAAGAATCTGGT	chromosome01	18980816	18980918	plus	AG	GT	0	0	2	2	4	null	null	cds-cds	null	null	null	null	null	null	null	null
Os01circ13571	HWI-ST620_0167:6:1101:11098:114833#0/1_A_CCAAGGATGGAAATAGTGCATCTGGTTGCCATGTGCTGTTACTTTTGTTGTACCTGAAAGTAGTTGAACTCATGTTTCTCGCACCACTGTTTCAGTTTAG	chromosome01	20167825	20168293	minus	AC	CT	1	2	0	1	4	Mutator	null	cds-3utr	chromosome01	20167825	-	Os01t0520600-01	null	null	null	null
Os01circ14789	HWI-ST620_0177:7:2205:5842:32988#0/1_A_CTAGGATTTTACATGAATAGCTTGTAACTGTGCCTCGATGTTACCGACGATCACGACCTCCTACCTTGGACCTCAAAGCAGTAAAAGTTCTTGTCCTTGG	chromosome01	23045567	23046195	plus	AG	GT	0	0	4	0	4	null	null	intergenic-cds	null	null	null	null	chromosome01	23046195	+	Os01t0563000-04
Os01circ18550	HWI-ST620_0166:8:1103:18885:183225#0/1_A_CCCCAGGGTTATCATCAATTAAATTATCAGTCTCTCCTTCCATACCTTTCTCAATGCCTGCATGCATGCCGGAGACGATTTGCAACATCCAGCTCAAGGC	chromosome01	28332076	28332196	minus	AC	CT	1	0	3	0	4	null	null	cds-cds	null	null	null	null	null	null	null	null
Os01circ18705	HWI-ST620_0166:6:2201:9163:107493#0/2_A_CTTTCTCAATGCCTGCATGCATGCCGGAGACGATCTCTTGAACTTCAGGAGAACTAGGAACAGCAGGAGAATCCTCCTCACCATCCCCAGGGTTATCATC	chromosome01	28332110	28332238	minus	AC	CT	0	0	4	0	4	null	null	cds-cds	null	null	null	null	null	null	null	null
Os01circ18745	HWI-ST620_0166:8:2101:11600:195784#0/1_A_GACGATCTCTTGAACTTCAGGAGAACTAGGAACAGCAGGAGAATCCTCCTTGCCTAGGCTATCTCTCCTTCCATACCTTTCTCAATGCCTGCATGCATGC	chromosome01	28332148	28332251	plus	AG	GT	0	0	4	0	4	null	null	intergenic-intergenic	null	null	null	null	null	null	null	null
Os01circ18761	HWI-ST620_0166:6:2306:18056:88857#0/1_A_CATGCCGGAGACGATCTCTTGAACTTCAGGAGAACTAGGAACAGCAGGAGAATCCTCCTTGCCTAGGCTAGTTTCTTCTCTCCTTCCATACCTTTCTCAA	chromosome01	28332148	28332257	plus	AG	GT	0	0	4	0	4	null	null	intergenic-intergenic	null	null	null	null	null	null	null	null
Os01circ20027	HWI-ST620_0173:6:2101:4997:148548#0/1_A_TCTTTCAACTGTTGCAGAACCCAGAATGCTCCTTCCCGTTCCTATATGCATCAAGCACCATACGAAGGTGCCTTCGTTCGTCAAAGTGGTAGCCACTAGA	chromosome01	29458424	29460249	plus	AG	GT	3	0	0	1	4	null	null	cds-cds	null	null	null	null	chromosome01	29460249	+	Os01t0674700-00
Os01circ21127	HWI-ST620_0167:5:2107:9807:146250#0/1_A_GTCGAAGAATGTAATATCCTGCCTCAGAACGGCTTTCAGGTATAAAGAACGGATGCGGGCAGACTGCCTTTCTCAATGATTAGCTTTCCACCATACCAGA	chromosome01	30520767	30521691	minus	AC	CT	3	1	0	0	4	null	PIF/Harbinger	intergenic-intergenic	null	null	null	null	null	null	null	null
Os01circ21270	HWI-ST620_0177:6:1103:6767:33514#0/1_A_CGGATTACAGAAATGGTCCATGATGCATACTATTCTCGATTGTATCTTGCTAAGCCAAGGCCAACTATTTATAATTTGGTAAAGGAGATGACCGAAAGGA	chromosome01	30804269	30804685	minus	AC	CT	0	0	4	0	4	Tc1/Mariner	null	cds-cds	chromosome01	30804269	-	Os01t0702000-01	chromosome01	30804685	-	Os01t0702000-01
Os01circ22224	HWI-ST620_0166:6:2208:19871:135769#0/2_A_GCTGGACAAGGAAGAGCTATAATGCGTGGTCCAATGGTTTCGGGAGTGATTAATCAGTTGCTGACCACTACTGATTGTTTGAAGAGAAGGCAAATGAGGT	chromosome01	31739062	31739647	plus	AG	GT	1	0	2	1	4	null	null	intergenic-intergenic	null	null	null	null	null	null	null	null
Os01circ24769	HWI-ST620_0171:6:2102:7051:192661#0/1_A_TGCAGGGAGATGAGCCGCTCCTGGTCCGCGGTGAACTCGGTGAAGTTGGAGTAGAGCGCCCGGATCCAGCGAACTTGTGCCTGTTCATGGGGTAGATGAG	chromosome01	34519442	34520463	minus	AC	CT	0	1	0	3	4	null	null	cds-cds	chromosome01	34519442	-	Os01t0775400-01	chromosome01	34520463	-	Os01t0775400-01
Os01circ05647	HWI-ST620_0166:8:2201:18235:172008#0/1_A_CAAGGTTAGACCTTTGCATTTCAGGAATCCCTTCTGGCTGCATTTCTTTAAGGTAAAATTCCTCTGTATAAAGCCATCATATAGTTAGTGAAGGGCAGGA	chromosome01	6118744	6124039	plus	AG	GT	0	0	4	0	4	Tc1/Mariner	null	cds-3utr OR 3utr-intergenic	chromosome01	6118744	+	Os01t0212100-01	chromosome01	6124039	+	Os01t0212100-01
Os01circ06003	HWI-ST620_0166:6:2303:7738:37855#0/1_A_GTCCATGCCAATCTTAAATAACCTGGCTCAACGCTCAAAGATTGAGATGAAGTCTCAAAATAAGTTGGTTTCGGTTTGGTAGCGAAAGCATATGGCATAA	chromosome01	6654022	6654137	minus	AC	CT	0	0	4	0	4	null	null	intergenic-intergenic	null	null	null	null	null	null	null	null
Os02circ12141	HWI-ST620_0173:6:2108:11993:97978#0/2_A_CAGAATATAATCTCATCACAGGACAGGAGTCCTTCCATCCCTTTTACCCTTAGTCTTGTGGAGGAGACCACTCAGCGGGTGCAGGGCTGCGTCCGCATCG	chromosome02	14697656	14699118	minus	AC	CT	4	0	0	0	4	PIF/Harbinger	null	cds-3utr	null	null	null	null	null	null	null	null
Os02circ03703	HWI-ST620_0177:8:2302:7673:30195#0/1_A_GAGGAGGAGATGATCGAGGAGGGGCGAGTAGCTTGTGAGAAGACATAGAACCAGTAGAGGAAGACGACGGAGAAAGACTGGACGAGATGGGTGCGGCGCC	chromosome02	1696644	1697155	plus	AG	GT	0	4	0	0	4	Mutator	Mutator || Tc1/Mariner	intergenic-intergenic	null	null	null	null	null	null	null	null
Os02circ14354	HWI-ST620_0166:8:1302:19838:110703#0/2_A_CGGAAGGGTGAACCCGATGGTGAAAAGATGGACATGACCACACCAGTTATAACAAAGAAGTCCTACTATGTCGCTGAGACGACAATGCCTGGAAGAAGCG	chromosome02	20460008	20460334	plus	AG	GT	0	0	4	0	4	null	Mutator	cds-cds	chromosome02	20460008	+	Os02t0533200-00	chromosome02	20460334	+	Os02t0533200-00
Os02circ15951	HWI-ST620_0166:6:2307:20143:73105#0/1_A_TATTACGAATAACTTTAATTGTGACCACCTGTTTGCTTGCTGGACTGCGGCCCCAGGAAAGACGCACTGCCTGCTTTCCAATTGTTGATCCATTCAACCC	chromosome02	22425021	22426265	plus	AG	GT	0	0	3	1	4	null	null	intergenic-cds	null	null	null	null	chromosome02	22426265	+	Os02t0567900-01
Os02circ16783	HWI-ST620_0171:1:2202:5594:166919#0/1_A_CGAAAGCTGGAGTAACAGGCACGCGCGACCGAGCCCGGCTAAAGAGGGCTAAAGAGTTGGTAGTGGGGGTTTAAGTGGGCGAACCCATGCACCACGAAGA	chromosome02	23725266	23725972	minus	AC	CT	0	0	0	4	4	null	null	intergenic-intergenic	null	null	null	null	null	null	null	null
Os02circ19571	HWI-ST620_0167:4:1201:20631:72125#0/1_A_TGGTGGCGGTGTTGCAGGTAAGCTCGAAGCCGTCCCGAAAGCAGCCTCCCGATGATATATTTTGGCAATTGCTGCCGGGGGTACAAGCATAACTTGATTT	chromosome02	26215162	26215812	minus	AC	CT	3	1	0	0	4	null	null	intergenic-intergenic	null	null	null	null	null	null	null	null
Os02circ20900	HWI-ST620_0173:6:2201:10394:191806#0/1_A_TCTTCTTCTTCCTCTTGACCACCTCGCCGTTGTCATCGATCACTTCCTCTGTAGCCGGCGGTGGGTGTGCTGGCGCCGGAGTAGTGGCAGGAGCAGCCGG	chromosome02	28021948	28022397	minus	AC	CT	3	1	0	0	4	null	null	cds-cds	null	null	null	null	null	null	null	null
Os02circ23180	HWI-ST620_0173:6:1107:8909:55498#0/1_A_GTCACCAGCGGGGAGGTGAGAACGGTGGTGCGGCCCGCGCGGGAGGTGCTGCGGGTTGGGCCCGTTGCGGATGTAGGCGCCGCCGGCGAGGCAGCGCGGG	chromosome02	29883566	29883989	plus	AG	GT	4	0	0	0	4	null	Tc1/Mariner	intergenic-intergenic	null	null	null	null	null	null	null	null
Os02circ24557	HWI-ST620_0167:5:1207:10798:32391#0/2_A_CAGTTTGAATGGCCAGTGAATCATACAGCATTAAGTCCTGACAGAAAGCTTGCTGTTATTGTGGGGGACGTTTCTCTTCACGTGAGGATCAATGTCCAAT	chromosome02	30791404	30796806	minus	AC	CT	3	1	0	0	4	null	null	5utr-cds	null	null	null	null	chromosome02	30796806	-	Os02t0721600-01
Os02circ24834	HWI-ST620_0166:6:1303:10892:55800#0/1_A_TGTCTCTGAATTGGTGACATTGCTAATCCAAACCTGCCAAATCTTCATGCTTGAGATAACGGCACAATAGGTGTTTGATTTTATCTGGGATTGCCTTAAT	chromosome02	31149386	31153043	minus	AC	CT	0	1	3	0	4	null	null	3utr-5utr-acrossGene	null	null	null	null	chromosome02	31153043	-	Os02t0728100-01
Os02circ26098	HWI-ST620_0171:7:1104:20571:71885#0/1_A_GTTCGCGGAGTGAAGAGCAGAGAAGTGGGGGGACGACTTGAGCAGCGGCAACGCCATTGCTGGTCATAGTACCAGTGCACGGTGCCGTCACCCCCTTGTC	chromosome02	32058300	32059099	plus	AG	GT	2	2	0	0	4	PIF/Harbinger	null	5utr-cds	null	null	null	null	chromosome02	32059099	+	Os02t0744000-01
Os02circ26336	HWI-ST620_0167:4:2106:9622:135557#0/2_A_CCTGCGCAGGTACCTGGCCGAGTTCGACCGCCTCTACTGGCCGAGATGTACGTCGGCGACGACGTCTCGCCGGACTTCTACGGCTGGGTGTTCCCCAAGT	chromosome02	32103710	32104207	plus	AG	GT	4	0	0	0	4	null	null	cds-cds	null	null	null	null	null	null	null	null
Os02circ26503	HWI-ST620_0173:6:1305:14195:92280#0/2_A_GGCCAGTAACACGGAGGTGCTGACCTGCGGAGAAGAGTATGATTTGGAGAAAGCAATTGTAGCTGGTGGCATGGATGCTCAAGGTCGGGTGCTACGCTCT	chromosome02	32301440	32301655	minus	AC	CT	4	0	0	0	4	null	null	cds-cds	null	null	null	null	null	null	null	null
Os02circ27297	HWI-ST620_0173:6:1102:8981:115925#0/2_A_TTCAATATAGGCCAGGGTTCGGTGATCAAAGGATGGGCTTCGAGAAGACGATCCTGAAAGCCGGCACCGGTCCCAAGCCCGTCAAGGGCCAGAAGGTCAC	chromosome02	32875017	32875736	minus	AC	CT	4	0	0	0	4	null	null	cds-cds	chromosome02	32875017	-	Os02t0760300-01	null	null	null	null
Os02circ05033	HWI-ST620_0166:6:2102:5221:124299#0/2_A_CTTCTGATCAAGTTGGTTCACACAACACATGTTCTGTCAATTGTACTATATTTTTCTAAGATTTTACTGGTTCCACGCAAGCGACAAGGTTCGCTGCTGC	chromosome02	3305706	3308431	plus	AG	GT	0	0	2	2	4	null	null	intergenic-intergenic	null	null	null	null	null	null	null	null
Os02circ29785	HWI-ST620_0166:8:1202:13032:62259#0/2_A_GTTTGTGGTTTTGGCTTTTGTTGCCAATGCTGTGCAAAACTACAGGTGTGCTTCAGCCTGATGGAGACCAAGGGAGGCAATTGGAAGAGAGGTCTTATTG	chromosome02	35691702	35691899	plus	AG	GT	2	1	1	0	4	null	null	cds-3utr	null	null	null	null	null	null	null	null
Os02circ30081	HWI-ST620_0171:3:2101:11618:59757#0/2_A_GGATTGGCAAAGCTTAAACCAGTTTTCCGGAAGGATGGTACCACAACTGCAGGCCTGGAATCCATGTCAGTAAATGCTATGGGTTGGGAAGGACAAGTAA	chromosome02	35938879	35939570	minus	AC	CT	2	2	0	0	4	Tc1/Mariner	null	cds-cds	chromosome02	35938879	-	Os02t0817700-02	null	null	null	null
Os02circ30893	HWI-ST620_0171:7:2301:9737:129527#0/2_A_CTACGGAACCAGAAGGAAGATTTCAGCGACATGGTGGCGGAGAACGCAAGCAAGAGGAGGAAGAAGAGCCAATGGAAGATGAAGACATGGAAGACGGCAT	chromosome02	36413542	36414450	plus	AG	GT	2	2	0	0	4	null	null	cds-cds	null	null	null	null	chromosome02	36414450	+	Os02t0827300-01
Os02circ31097	HWI-ST620_0167:5:2306:7720:95366#0/1_A_GGGTCTGATTACACACCATATGGGCAACAGGAAGCCTTATCATTGTCCAAACCAACGTCTTCAAATGCTGAGAATGCATCAGCTGACAATACTTCAGCCC	chromosome02	36540179	36541406	minus	AC	CT	2	1	1	0	4	null	null	cds-cds	chromosome02	36540179	-	Os02t0830100-02	null	null	null	null
Os02circ05776	HWI-ST620_0171:3:1202:8561:170965#0/1_A_TGGCGAAGGAGTTCCAGAAGATGAAGGTGACGATGGTGTTTGTGTTGGTGTAGAAGCAAAAATTTCTGTTTCTGATCGCTGCAAGTTAATTACATGTTCT	chromosome02	4171213	4171876	plus	AG	GT	0	4	0	0	4	null	null	intergenic-intergenic	null	null	null	null	null	null	null	null
Os02circ08387	HWI-ST620_0171:6:1304:3001:198730#0/2_A_GAAAATTGGAGAATGGGAGGAATTGCACACATGAACTGTCTTGCCAGAGTGGAGATGCTATGATCTGTAACAGCCCCGATCAAGAAAGGATCCAACCCAC	chromosome02	6540334	6541170	minus	AC	CT	0	0	1	3	4	null	null	5utr-3utr OR cds-intergenic	null	null	null	null	chromosome02	6541170	-	Os02t0216300-07
Os02circ08762	HWI-ST620_0167:5:2208:7320:2374#0/1_A_TAGGACGAATCATACCCTTGGGAAGCATATGCAGGAGGCTGGCTGGAATTATAGCTAGTAGCATCACCAGGTGCACCAGGGTAAGGTGGAGGTGCGCCAT	chromosome02	7012937	7013548	minus	AC	CT	2	2	0	0	4	null	null	intergenic-intergenic	null	null	null	null	null	null	null	null
Os02circ09599	HWI-ST620_0171:5:2206:18752:132292#0/1_A_CTTTCCAACAGGTGTCTTCTCGTTGAATGGAAAGAAGGTACCAAAGAGCTCCAAGGACCCTCATGAGAAGCGACAGGCAAAGATGCCTCTTTATCTCTCT	chromosome02	8779314	8780438	minus	AC	CT	0	0	2	2	4	Tc1/Mariner	null	cds-3utr OR intergenic-cds	chromosome02	8779314	-	Os02t0255000-03	chromosome02	8780438	-	Os02t0255000-01
Os03circ12299	HWI-ST620_0171:7:1104:5806:78445#0/2_A_CTCCAACTCCAACCACGCCTCCGCTTCGGCGGCGCGCGAGGCGTCGGCGGCGGTGTCGGAGCTGGCAGAGCTGGACGGCGCAAGGGATCAGCCGGAGGAG	chromosome03	10565679	10566152	plus	AG	GT	0	4	0	0	4	null	null	intergenic-intergenic	null	null	null	null	null	null	null	null
Os03circ14222	HWI-ST620_0171:7:1201:16391:103240#0/2_A_GAGCTTTAGCCAACTACATTGATGAGGCTGGCTACAAAGCGATTGCTACTACGTAGCATGGAGCCATGGAGAAAGATCTCTTGCGGGCCTTTTTATGAGT	chromosome03	12324838	12326787	minus	AC	CT	2	2	0	0	4	null	null	cds-3utr	null	null	null	null	null	null	null	null
Os03circ15866	HWI-ST620_0167:7:2206:17257:141331#0/1_A_GGCGACGTTGACGACGATTAGCACCTTCTGAAAAACGGGATATTCAGCTTTAAATCTTGTGCAAGCAAAATCCTTTATTTGCTGGTCAGATCCTGGCTCT	chromosome03	14426359	14427157	plus	AG	GT	4	0	0	0	4	null	null	cds-cds	null	null	null	null	chromosome03	14427157	+	Os03t0358100-01
Os03circ16439	HWI-ST620_0166:6:2302:11804:113489#0/2_A_CCAGAAGTTCGATGATTTTATTTCTGATCAGGATTGCCGGTCAGATGCCCAAAGCTTTTGACATCCTACAAGATGTTGCGCAACACACTCTGTCTAATTT	chromosome03	15463239	15464266	plus	AG	GT	0	0	2	2	4	null	null	intergenic-cds	null	null	null	null	chromosome03	15464266	+	Os03t0377500-01
Os03circ19191	HWI-ST620_0167:5:2202:13115:148987#0/1_A_CGAAACTCCATCTGTTCCACTCTTTCCCGGTTAATTCCCGTGTACTCCAGCATATTCTTGTATGGTCTTTCCACTTCACGTAGTACAAATGGCTTCCCAT	chromosome03	22464738	22468745	minus	AC	CT	3	1	0	0	4	null	null	cds-cds	chromosome03	22464738	-	Os03t0586700-01	chromosome03	22468745	-	Os03t0586700-01
Os03circ19404	HWI-ST620_0173:6:1205:6007:37187#0/2_A_CGGTGTGGTTCAAGGCCGGCGCGCAGATCTTCTCCGAGGGGGGGCTCGACTACCTGGGGAACCCCAACCCAACCGCCGCCGCATCGCCCTCGTTAGAACG	chromosome03	22811037	22811601	minus	AC	CT	3	1	0	0	4	null	null	cds-intergenic	null	null	null	null	null	null	null	null
Os03circ19602	HWI-ST620_0177:6:1102:14302:58659#0/1_A_CTTGCCTTTCCTGCCAAAAAGAACATTGTGAAGAAACTTAAGATCAGCAGGTTTTTTCCTTGATATTCTGTGCGCCACGTGTTGAAATCAACTTTTTTAA	chromosome03	23032136	23034770	minus	AC	CT	0	1	2	1	4	null	null	cds-cds OR intergenic-3utr	chromosome03	23032136	-	Os03t0596900-03	chromosome03	23034770	-	Os03t0596900-02
Os03circ02972	HWI-ST620_0166:7:1108:18275:93558#0/2_A_GTCTCAAGCAGAGATTTCTTTATGATGAAATTGAAGCTGGGGATCCTCTCTGATATGCGAAACCTCTCCGCAGATTGGATGGCCAACACTAGCAAGGGAG	chromosome03	2440112	2441774	plus	AG	GT	0	0	1	3	4	null	null	intergenic-intergenic	null	null	null	null	null	null	null	null
Os03circ20635	HWI-ST620_0171:6:1303:5406:195083#0/2_A_CTGTGAAGTGACTGCAATTCTTATCCTATATGGCCTTCCAAGATGAGGTAGATATTGATCATCGTTTACATGAAGATGAACAACTTGCACGGGCTCTACA	chromosome03	24668789	24671833	plus	AG	GT	0	0	1	3	4	null	null	cds-cds	chromosome03	24668789	+	Os03t0626600-01	chromosome03	24671833	+	Os03t0626600-01
Os03circ20866	HWI-ST620_0171:7:2105:17574:33068#0/1_A_TTTCCATGTCAAAGGGTTGAATGTAAGAGGTCTTCTCATGATGTTTTTTGGAGCGATCAGCTCCTGAATCGTGATGCGCACTCTTATCCTTCTTCTTTTC	chromosome03	25540148	25540602	plus	AG	GT	2	2	0	0	4	null	null	cds-cds-acrossGene	null	null	null	null	chromosome03	25540602	+	Os03t0641700-02
Os03circ21490	HWI-ST620_0173:6:2207:16109:174402#0/1_A_CGTCGTTGTCTTCGACGAGGACGCACGTCACCCGGTACATCACCTTCACCACGCCCTCCGTCAGCGGCGTCACGTACCGGTTCCCGCCGCGGATGGTGCC	chromosome03	26451078	26452424	minus	AC	CT	4	0	0	0	4	null	null	cds-cds	null	null	null	null	null	null	null	null
Os03circ22990	HWI-ST620_0166:8:2303:9857:148377#0/2_A_TGGTGGGACGGATGTTAAAGTGTTCTGCTCTCCTATGGAGCAGATTCTTGAGAGGCTCCGTGCATTTGGAGAATTCGAGATTATAATATTTGGGGATAAA	chromosome03	28298900	28303255	plus	AG	GT	0	0	2	2	4	null	null	cds-cds	chromosome03	28298900	+	Os03t0689100-01	chromosome03	28303255	+	Os03t0689100-01
Os03circ23598	HWI-ST620_0171:1:1201:10037:17998#0/2_A_CAAAAGATGGCTAGCGATGTACTACTATTATCTGACAAAGTCTCTTCCTTAGTTTCATCTGGAAACATCTCCGAGGTTGATAAAAATCAACTGGTTTTAT	chromosome03	29120536	29122048	minus	AC	CT	0	0	0	4	4	null	null	5utr-cds	chromosome03	29120536	-	Os03t0704200-01	null	null	null	null
Os03circ25470	HWI-ST620_0173:6:2106:13182:156496#0/2_A_GGCTGTCAGAATCTGTCAACTTGTGGGGACATAATCTTCCTTTGCTGTATGACCGTGTTCTGAAGTACCCCGAGCGTGTACAAAATTTGTACTTCACTTA	chromosome03	30873802	30874855	minus	AC	CT	4	0	0	0	4	null	null	cds-cds	null	null	null	null	chromosome03	30874855	-	Os03t0733800-00
Os03circ31822	HWI-ST620_0171:4:2208:10485:54904#0/1_A_GCGTCAGTTGATCGGTCTTGCATGGCACGTCCTTCTTGATTAGATGGTTCTTGAGTTTCTTTTGGTTCCATGGTCCCTTGTACTCAGGGTTTGGAATGGT	chromosome03	35852146	35853082	minus	AC	CT	0	4	0	0	4	null	null	cds-cds	chromosome03	35852146	-	Os03t0832200-01	null	null	null	null
Os03circ04424	HWI-ST620_0166:7:2202:17918:153344#0/2_A_CAAGTGAAGAAGATTGCAGAGTTGAGAAGATTATGTGCAGAGAAGTTGTTGATCTAGTATTGATTATGTCGGTGAATCCTGGGTTTGGTGGGCAGAGCTT	chromosome03	3715374	3715483	plus	AG	GT	1	0	3	0	4	null	null	cds-cds	chromosome03	3715374	+	Os03t0169100-01	chromosome03	3715483	+	Os03t0169100-01
Os03circ06437	HWI-ST620_0167:6:1301:7056:107741#0/1_A_GCACCGGCACTCGGCTTCTTCATGTAATCATCTTCTTCTTCCTCATACCTGCCACCGCCGCCACCCGAGTGCGCGCTAGGCTTCTTCTTGTAGTCATCTT	chromosome03	5823275	5823541	minus	AC	CT	4	0	0	0	4	null	null	cds-cds	null	null	null	null	null	null	null	null
Os03circ08963	HWI-ST620_0173:6:1206:15434:38761#0/2_A_TAATCGTTCAGGCGGTGTGCAGGGAGGTGGAAGATCATCAGCAAGAGAGACCATTGGAAGGGTGGCTGCAGGAGCTCTTGCAAAGAAAATTCTTAAGCTC	chromosome03	8226936	8228049	minus	AC	CT	3	1	0	0	4	null	Tc1/Mariner	cds-cds	chromosome03	8226936	-	Os03t0254800-01	chromosome03	8228049	-	Os03t0254800-01
Os03circ10036	HWI-ST620_0171:8:2103:20071:112638#0/1_A_CAGGTGTTCAAGCTCGGGCGCGAACTTCTGCGTCTTGAACAGCTTCGCCTGCTTGTTGGAGAAACGGGTGGCCTGATCTAGAATTACCGGCATCCCCGTC	chromosome03	9081309	9083042	minus	AC	CT	1	1	1	1	4	null	PIF/Harbinger	cds-cds OR 5utr-5utr	null	null	null	null	null	null	null	null
Os03circ11166	HWI-ST620_0167:7:1105:17305:196387#0/1_A_TGTCGCTTTAATTTTGCCGCCCTGGAAGTAATCACATGGGTTCACATCGAAGTTGAATGTACGGGCACAATACCAAAGACTTGGGCAAGGAATGGCACGT	chromosome03	9684350	9684603	minus	AC	CT	4	0	0	0	4	null	null	cds-cds	null	null	null	null	null	null	null	null
Os04circ08019	HWI-ST620_0173:6:1306:16583:31560#0/1_A_CCTCCCTCCAGAGATATCACTGGCCACAACCTCACCAAGTTCTGGGCTAAGAGCCTTCTTCAACGCAACAATCTCACCAGTCTTCTTATCCCTTGCCCTG	chromosome04	24872080	24872463	plus	AG	GT	2	2	0	0	4	null	null	cds-cds	null	null	null	null	null	null	null	null
Os04circ08372	HWI-ST620_0167:7:2101:11015:71214#0/1_A_TCATCATCTTCCTCTTCTGCTGCTCTCAGTCTTTCTTGCCCTTTTTTTCCTTCGGGGAGACGGGAGCGTCTCTCGGGCTTGTGTTCCTCGGCTTCTTGGA	chromosome04	25155508	25155708	minus	AC	CT	3	1	0	0	4	null	null	ncRNA-ncRNA	chromosome04	25155508	-	Os04t0493100-01	null	null	null	null
Os04circ08674	HWI-ST620_0167:4:2206:16070:132065#0/2_A_GAGGAGTACAGCCTCATCAAGGATCCCAGCAGGGCCCTCTTCGCCATCCGCCATCCCGACCCGCACCACCGGCCACAGACGGAGAGTTCGAGAGCAGGGA	chromosome04	25358193	25358767	plus	AG	GT	4	0	0	0	4	null	PIF/Harbinger	ncRNA-intergenic	null	null	null	null	null	null	null	null
Os04circ08796	HWI-ST620_0166:6:1306:6248:134506#0/2_A_GCTCCCCTTGGCTACAGCATTGAGGACGTTCGACCTGCCGGAGGCGTGAAGAAGTTCCAGTCTGCTGCTTACTCCAACTAAGTGGATGTACTAATGGAGT	chromosome04	25415378	25415527	plus	AG	GT	0	0	4	0	4	null	null	5utr-5utr	chromosome04	25415378	+	Os04t0498600-01	chromosome04	25415527	+	Os04t0498600-01
Os04circ12069	HWI-ST620_0166:7:2302:20211:98061#0/1_A_GTGTCCACCTTTCCTCCTGTCTCCCTGAACACGGTCAGGTACAGCCTCCTGTCCAGTCGTGTGCCTTGCATATCCTTCAGAAGCTCGATGAGCTCGTTGA	chromosome04	29956666	29956812	plus	AG	GT	0	0	3	1	4	null	null	cds-cds	null	null	null	null	null	null	null	null
Os04circ14060	HWI-ST620_0177:6:1208:19197:92279#0/1_A_GTTATCCTCCCAGAGGCAAACTTCTTTCGACTATCATTAGTTAGTCGCAAAGACTTACGGAAAACAGCTGCGATCTGAGTTATCAGATTTGGCAGCATAA	chromosome04	32009119	32010923	minus	AC	CT	0	0	2	2	4	null	null	intergenic-intergenic	null	null	null	null	null	null	null	null
Os04circ14170	HWI-ST620_0177:8:2204:13542:113348#0/1_A_CTTTTGTCAGTGGCCTTTTTGCAGGAATAGTAGGTTTTGCTGGTTCATCACTTTCCATGTCACTATCTTCTTCAGAAGATTCATCGGAGCTGCTACTCTC	chromosome04	32047732	32048362	minus	AC	CT	0	3	0	1	4	null	null	intergenic-intergenic	null	null	null	null	null	null	null	null
Os04circ16322	HWI-ST620_0166:6:1306:20305:129167#0/2_A_CGAGGCGTTCATCCGCGACGTCGTCACCCGCCGCTGGCAGATGGAGTTCGTCCAGTTCTTCAACTGCTGGAACGGGAGAATGGAGTATCCTGATCGGAAG	chromosome04	34029885	34030112	plus	AG	GT	0	0	4	0	4	null	null	cds-cds	chromosome04	34029885	+	Os04t0657500-01	chromosome04	34030112	+	Os04t0657500-01
Os05circ06616	HWI-ST620_0171:3:2101:12790:137962#0/2_A_CCAAAATCATGGCAACTAATGGTGTTGTCCATCTTACTGTTTCAGATGACCTTGAAGATGTCCACTCCTGAATTTCCTAGTGGTAGGGAGATTATTGTTG	chromosome05	13095105	13095777	plus	AG	GT	1	2	0	1	4	null	null	intergenic-intergenic	null	null	null	null	null	null	null	null
Os05circ08536	HWI-ST620_0171:6:2203:6822:49865#0/2_A_CCGCCGGATCACCGCCCAGGACCACTTCGTCATCCTCGCCACCGACGGGGGATTCGGGTGCGAGGAGGGGAGCGTGTTGTGCGGCATCTTCGACGGGCAC	chromosome05	17047566	17048567	minus	AC	CT	0	0	1	3	4	Tc1/Mariner	Tc1/Mariner	cds-cds	chromosome05	17047566	-	Os05t0358500-01	chromosome05	17048567	-	Os05t0358500-01
Os05circ10307	HWI-ST620_0166:6:2106:12946:182829#0/1_A_GCCTTGTTGCCCTCGCTCTTGCCCTTGCCGAAGTGGAACACCCTCACGTTGCCGAACATGTCGAGGAAACGGCGGTAGGAGTCGTACGCGAAGCGGTCGC	chromosome05	19783673	19784322	minus	AC	CT	0	0	4	0	4	null	null	cds-cds	chromosome05	19783673	-	Os05t0405000-02	chromosome05	19784322	-	Os05t0405000-01
Os05circ11282	HWI-ST620_0166:6:2304:5049:99828#0/2_A_CGCCGCCACCGTCTGCTCCATCTGCATGTACGCCTCCCCCCTCTCCATCATGGTACGGGCTGCCGTTCGTGTCCCCAAACAACATCCTGGTGTCGACGAT	chromosome05	20930598	20930880	plus	AG	GT	0	0	4	0	4	Mutator || hAT	null	cds-cds	chromosome05	20930598	+	Os05t0426000-01	chromosome05	20930880	+	Os05t0426000-01
Os05circ11862	HWI-ST620_0167:5:1207:16333:43299#0/1_A_GGCTGGGTCCCCGCGGATCTGGGTTAGGGTGAAGAAGAGCTTGATAGTCATCAGCTCTCAGGCTGTTAGCCCATAGACCGTGCGAGATGCTCGTCTGGCC	chromosome05	22006318	22008297	minus	AC	CT	2	1	0	1	4	null	Tc1/Mariner	5utr-cds	chromosome05	22006318	-	Os05t0446800-02	null	null	null	null
Os05circ12178	HWI-ST620_0171:1:2101:3897:131473#0/2_A_CAACAGTGAGGAGAAGCGACTCCAAGGCGGTTGTCCCATGACTCCTCGTGAAGCTGCTGTCTTCCTCAAAGCTATGGGATACCTGAGATATGGATGAAGC	chromosome05	22283316	22284545	plus	AG	GT	0	0	0	4	4	null	null	5utr-cds	chromosome05	22283316	+	Os05t0451900-01	null	null	null	null
Os05circ14066	HWI-ST620_0171:2:1101:13854:136378#0/2_A_GTGAAAGGAGCATGTTGGACTTTTAGAAGGAAAAGACACTGCTGCAGGCTGCAACTTGGCCACAACTTCAGTCAGAAGCAGATTCTAACCTTCAGATGGT	chromosome05	24293834	24294550	minus	AC	CT	0	0	1	3	4	null	null	cds-3utr	null	null	null	null	chromosome05	24294550	-	Os05t0492500-01
Os05circ15917	HWI-ST620_0171:6:2202:5435:170654#0/2_A_GGTGCTTCCACTGATGACCTTGAAAGATGCAGATTGTAAATGGACCTGAAGTCTTGAGCAAGTTTGTTGGAGAAACTGAGAAGAATGTGAGAGATTTGTT	chromosome05	25881265	25883108	minus	AC	CT	0	0	2	2	4	null	null	cds-cds	chromosome05	25881265	-	Os05t0519400-03	chromosome05	25883108	-	Os05t0519400-01
Os05circ16557	HWI-ST620_0171:6:1304:2601:179618#0/1_A_TACTGAAGCAATAACTGCTGATCATCCTGGGGCTGCTGGTGCTATTAAATAGTTGAACATTGACCATAGAAAATATTTGGGTAAGCAACTTGTGGATCAG	chromosome05	26799646	26800736	plus	AG	GT	0	0	1	3	4	null	null	5utr-cds	chromosome05	26799646	+	Os05t0537300-01	chromosome05	26800736	+	Os05t0537300-01
Os05circ17502	HWI-ST620_0166:8:1308:10957:123118#0/1_A_TCATACAAAGCTTTTCTCTCAGGGTCCATGTTAACATCGTTTTGCCACGCCTCAGGGATCATCATCATGACAGCACAATGGTTCTCAAAATCAACTAAAA	chromosome05	27741515	27741921	plus	AG	GT	0	2	2	0	4	null	null	intergenic-intergenic	null	null	null	null	null	null	null	null
Os05circ19409	HWI-ST620_0167:5:2108:8806:3742#0/2_A_CCAGCATCATACAAAAAAGACACGGAGGGAGTTTTTTGTTAAATAGGAGTAACTCACGCATTTCTTACAGATGATGAATCACATCCACAGATAAAAGAAA	chromosome05	28751313	28752287	minus	AC	CT	3	1	0	0	4	null	null	intergenic-intergenic	null	null	null	null	null	null	null	null
Os05circ05192	HWI-ST620_0171:1:2201:15383:170159#0/2_A_GGCTGACCAACAAAAGAGTTGATACTTTCAATTACACAGCAATAGTTACGATTGTGATACTCCAAAATCCAAATTGGATTAGATTCTACATGACAAGAGA	chromosome05	7173194	7174576	minus	AC	CT	0	0	1	3	4	PIF/Harbinger	null	5utr-cds	chromosome05	7173194	-	Os05t0215800-01	chromosome05	7174576	-	Os05t0215800-01
Os06circ02688	HWI-ST620_0177:6:2203:9668:96081#0/1_A_CCCTCTATCCATTTCTAAGTGATTACGTAGGCTCTGGTTCATTATTATTAGATGTACCAGCATTTTGGTTCAAGCCAGCCAAGTGATGCCTAGCATTCCC	chromosome06	1877394	1878595	minus	AC	CT	0	0	4	0	4	null	null	5utr-cds	chromosome06	1877394	-	Os06t0134900-01	chromosome06	1878595	-	Os06t0134900-01
Os06circ02804	HWI-ST620_0166:6:1201:4675:186775#0/1_A_CCGGGGAATATATGCTGCTGATAAAGAAGCCTGGAAAAGCTCAAAAAAATAGAGGAGGAACTCATAGATTGAGAGTGATTCCTGAAAACCAGGACAACCA	chromosome06	2011962	2014463	plus	AG	GT	0	0	2	2	4	null	PIF/Harbinger	3utr-3utr	null	null	null	null	null	null	null	null
Os06circ15559	HWI-ST620_0177:7:1201:10513:113763#0/2_A_GCCTTCATGGCCAAGATCCCCAACGCCGTCCTGGGACAGGTGGACGGGGAGAACCCGAACCTGTACTTCAGGAGGGAGGACGTGGTGCTGTGCTTGCTGC	chromosome06	27825164	27825517	minus	AC	CT	1	0	2	1	4	PIF/Harbinger	null	cds-cds	chromosome06	27825164	-	Os06t0656500-01	chromosome06	27825517	-	Os06t0656500-01
Os06circ15957	HWI-ST620_0166:7:1308:13475:112901#0/1_A_GCTCTGATTGAGGCAGGACTCAAAAATGTCCTCTCAAGGGAACCTTCCCCATCAGATATCTCTACTGGTCTAGTAAGTCTCTGAAGTCTCCCAGTAACTT	chromosome06	28374963	28375451	minus	AC	CT	0	0	4	0	4	null	null	cds-cds	chromosome06	28374963	-	Os06t0665500-01	chromosome06	28375451	-	Os06t0665500-01
Os06circ15980	HWI-ST620_0177:8:1301:19343:198389#0/1_A_GAGGAGGAGAGCCATGGCCACTTTTGTGTTGTGCTTGTGTGTGTGTGGCCTCTCTGGTCAGATACTTGTAAAATTGATTCAGGTAGTGTACCAGCTACAG	chromosome06	28374366	28376510	minus	AC	CT	1	3	0	0	4	null	Tc1/Mariner || PIF/Harbinger	cds-cds	chromosome06	28374366	-	Os06t0665500-01	null	null	null	null
Os06circ19506	HWI-ST620_0167:5:2207:6112:76711#0/2_A_CCACTGGTGGGTGTTGTGGTGCAGCCAAGGAGGAAGAGGAGGACGACGAGGAGGAATCTGACAAGTCCAAGTCCGAGGTCAATGATGAGGATGACGACGA	chromosome06	31871428	31872024	plus	AG	GT	3	1	0	0	4	null	null	cds-3utr	null	null	null	null	null	null	null	null
Os07circ06526	HWI-ST620_0166:6:1204:9995:156009#0/1_A_GCTGCAGTTGCTGGAGAACTTTTACCTTTGGACCAGGTAGAGGTTCCATTGGTCCAGTGCTGGCTCTTTAATGACATTCTTCAAAGTTGCAAGACGGTCC	chromosome07	13948450	13949939	minus	AC	CT	0	0	4	0	4	null	null	cds-cds-acrossGene	chromosome07	13948450	-	Os07t0418000-02	chromosome07	13949939	-	Os07t0418000-02
Os07circ06566	HWI-ST620_0166:6:2207:9900:183827#0/2_A_TGAATTCCCTCATCCCTTCTCCCGTGTAAAACAACCTGCAGGATATAGAGGCATGTGCATGTGGCTGAGGCTCTGAAGGTACCAATCCACATAATTTTCA	chromosome07	14066120	14066318	plus	AG	GT	0	0	4	0	4	Tc1/Mariner	Tc1/Mariner	cds-cds	chromosome07	14066120	+	Os07t0419500-01	chromosome07	14066318	+	Os07t0419500-01
Os07circ06643	HWI-ST620_0167:5:2107:5412:137825#0/2_A_TGGGAACTTGGTGCCTGCTGGGTTCAGCATTTACAGGATCAGAAAAATTCTGATAAGGACAAAAAGCAAGGTGGTTGGGGAAGGGATGGCAAGAGTGACA	chromosome07	14254069	14255059	plus	AG	GT	4	0	0	0	4	null	null	intergenic-intergenic	null	null	null	null	null	null	null	null
Os07circ09638	HWI-ST620_0167:5:1206:9489:48123#0/2_A_CTCACCACCAAGGAAGGGAAGCTGACCGTGGAGCGGGAGAAGGTGCTCTACAACATGAACCAGGAGATCCAGACGGAGGACATCGACCTCCCCCTCACCC	chromosome07	20316777	20317313	minus	AC	CT	4	0	0	0	4	null	null	cds-cds	null	null	null	null	null	null	null	null
Os07circ10841	HWI-ST620_0167:7:2102:11292:150486#0/1_A_GGCGGCTCATGACGGTGGAGGTGAAGAGCGCGGCGTGCTTGATGTCAAGGGCGCGCATGCGGGGCACGGCGTCGATCATGCCGATGTCCTGCAGCCGCTT	chromosome07	21385269	21385577	minus	AC	CT	4	0	0	0	4	null	null	intergenic-intergenic	null	null	null	null	null	null	null	null
Os07circ11577	HWI-ST620_0166:8:1307:11296:46904#0/1_A_TCTTGATGAAAGAGGGACACAAGCCATCATCTATAGTGATGGTGCCTCTTACAAACTTCAACTTTTTTTTTAGCGCTCTCAAAGTAGCATATATTATTCA	chromosome07	21393391	21393491	plus	AG	GT	0	0	3	1	4	null	null	intergenic-intergenic	null	null	null	null	null	null	null	null
Os07circ11606	HWI-ST620_0166:8:1105:5057:111781#0/2_A_CCTCTTTCATCAAGATTGAATAATATATGCTACTTTGAGAGCGCTAAAACAAAACCTAGCCACCTCTTGACTCTTGAGTGTATGCTTGTTACCCGTGTGT	chromosome07	21393391	21393535	plus	AG	GT	0	0	3	1	4	null	null	intergenic-intergenic	null	null	null	null	null	null	null	null
Os07circ14105	HWI-ST620_0173:6:1202:12051:52025#0/2_A_TCAACAACCGCTTCAAGCGCGAGGAGGAGCTCGAGGAGCCGGAGTTCAGGGACATCCACGCGCTGAGCCCGCCGCCGACGCCGACGCCGAGCCAGCCGTC	chromosome07	23550258	23550803	minus	AC	CT	4	0	0	0	4	null	null	cds-cds	null	null	null	null	null	null	null	null
Os07circ14125	HWI-ST620_0167:5:1207:9308:55436#0/1_A_CCCTGAACTCCGGCTCCTCGAGCTCCTCCTCCACCACCACCTCCTCCTTCTTCACCTGCCCCACCGACACCTCGTCGCCGTGGCCGCCGCCCGCCGACGA	chromosome07	23550330	23550818	minus	AC	CT	4	0	0	0	4	null	null	cds-cds	null	null	null	null	null	null	null	null
Os07circ16709	HWI-ST620_0171:1:2101:2145:15824#0/2_A_GGATGATAGGGTTTATGAGGAGGGGAATGATGACGACGAGGAGGATGTGGATGACGAGGATGAAGAGGAGGTTGAGGATGATGGTGAGGAGGCTGAGCCA	chromosome07	25645824	25646051	plus	AG	GT	1	2	0	1	4	null	null	cds-cds	null	null	null	null	chromosome07	25646051	+	Os07t0607800-02
Os07circ17340	HWI-ST620_0171:5:2303:17137:100632#0/1_A_CCCACCGCCACCTCCTGCACGTGCTCCCCCACGCTCTCCACCACACGGTGGAAATGCCACAACTGAGGAGGCATGCCATCGCCGGTGGGAATCCAACATC	chromosome07	26360130	26360455	minus	AC	CT	0	0	0	4	4	PIF/Harbinger	null	cds-cds	chromosome07	26360130	-	Os07t0621800-01	chromosome07	26360455	-	Os07t0621800-01
Os07circ17726	HWI-ST620_0167:6:1301:20455:86851#0/1_A_CGGGCAGAACGCGAGGGCGTAGACCGTGTCGGGCGCGCCGCCGACGGTGGCGTTGGCGAGGAGGACCTCGTAGATGGCCCCGTTGAACTCGCCGACGTCG	chromosome07	26715376	26715684	plus	AG	GT	4	0	0	0	4	null	null	intergenic-intergenic	null	null	null	null	null	null	null	null
Os07circ18018	HWI-ST620_0167:7:1104:8014:177773#0/1_A_CGGGAGGAAGGTGGGGGTGAGCGAGGTGACAAAACCAAAACCCCTCGACCTGCCGCTCTCCCTGTCGTAGATGACCTTGGCATCGAGCACGGTTCCCTGC	chromosome07	26871993	26873535	minus	AC	CT	3	1	0	0	4	null	null	intergenic-3utr	null	null	null	null	null	null	null	null
Os07circ18905	HWI-ST620_0171:4:1107:17903:51492#0/1_A_GTGGGAACTGTTTGGAATTGTGTAGGTGGTCTAGGCTGATGGTATGTGGTGGGAGGTACACAAGAAGCAAGATAGCACTACTGTGCAGACAAACCCTCAT	chromosome07	28324228	28325733	plus	AG	GT	0	4	0	0	4	null	null	cds-3utr	null	null	null	null	null	null	null	null
Os07circ19499	HWI-ST620_0167:4:2103:18321:181648#0/2_A_GAGCAAGGGCACTTCCCAATTATCCCCAGCTTATCATCGGCATAATAGGCGCCTGTTTTGGTCATGGGGATTCACGAGCAAAGACCGAAATACTACTATA	chromosome07	28484538	28485664	minus	AC	CT	4	0	0	0	4	null	null	intergenic-5utr	null	null	null	null	null	null	null	null
Os07circ19778	HWI-ST620_0167:7:2104:6619:52194#0/1_A_GGCCAATAATAACGCCGTTCTCCTCGAGCTCTGTCAAAAATGCCAGTGCTCCTTCTAGCCTGTTCACTTCAAGGGTGTTCTTCCTGTCTACAGCGAGGTC	chromosome07	28590305	28590478	minus	AC	CT	4	0	0	0	4	null	null	cds-cds	null	null	null	null	null	null	null	null
Os07circ20930	HWI-ST620_0171:1:1302:14970:171687#0/1_A_CCCCAAGAACCCCAGGGACGACTACCAGCACTGGATCAAGGACATGAGGTTCAGCACCAAGGTGAAGGACGGGGAGGGAATGCCGGCGTTCGCCCTCGTC	chromosome07	29664706	29665331	plus	AG	GT	1	2	0	1	4	null	null	cds-cds	chromosome07	29664706	+	Os07t0683900-01	chromosome07	29665331	+	Os07t0683900-01
Os07circ03152	HWI-ST620_0177:7:2104:4613:82707#0/1_A_GAGCCCTGTTGTGCAGCGGAAGACACCGCCGAAACCCACATCTTCCCCGAAGACATAAGAGCTTGAGTCCAGGAACATGACAAAAGAAAGCCTCTGGTGA	chromosome07	3752907	3753973	minus	AC	CT	0	0	3	1	4	null	null	cds-cds	chromosome07	3752907	-	Os07t0170100-01	chromosome07	3753973	-	Os07t0170100-01
Os07circ03402	HWI-ST620_0177:8:2203:12380:28565#0/1_A_GCTTGGGGAGGGTGTCGGGGAGCGCGCCGGAGAAGCGGTTGGAGTTGAGGTGGAGTTCCTGAGCCGCGGCAGCGCGCAGATCCCCTCCGGGATGTGGCCG	chromosome07	4062016	4062587	plus	AG	GT	1	3	0	0	4	null	null	5utr-cds	null	null	null	null	null	null	null	null
Os07circ04405	HWI-ST620_0167:4:1304:19466:187453#0/1_A_GAAGAGGTCGAGGGAGGGGAGCTCGAAGAGGAGGAGGAAGGCGAGAACATCATTGATCAGGTGTCAGAAATCAGCAGCTTGAAACGGAGCCACCGACCAA	chromosome07	5160995	5164997	plus	AG	GT	4	0	0	0	4	null	PIF/Harbinger	intergenic-intergenic	null	null	null	null	null	null	null	null
Os08circ06987	HWI-ST620_0171:5:2306:1798:190042#0/1_A_GAGAGGGTTGATGCAAGTTGCTGGCAATAATGAACCAAAGGAACCTTTAGGCCCAAAGAACTTCCAGTGGCAGCAAATAAGTGGAGGATGCTTCTGGTCC	chromosome08	14829003	14833140	plus	AG	GT	0	1	0	3	4	null	null	cds-intergenic	chromosome08	14829003	+	Os08t0332800-01	null	null	null	null
Os08circ08332	HWI-ST620_0177:8:2205:15670:70069#0/1_A_GTGTTTTTCTGTTTGTGTTTGTGTGTGTGTTCTCCCTCCCAAGTACTCCTGTGCTGCAAGCATCTGTGCTCCGGCATACTTGTTGTCCCAGCTGAACTCA	chromosome08	18393407	18396401	minus	AC	CT	0	4	0	0	4	null	null	intergenic-intergenic	null	null	null	null	null	null	null	null
Os08circ01740	HWI-ST620_0171:4:1302:19510:94815#0/1_A_GGGTAAGTGCATGGAATTATCTCTCCGTTTATGTATTTATCACATTCAGAGGTCATAGTCCACCCAAAATATCAAGAATGATGATGATCCACATGATCCA	chromosome08	2177412	2177885	minus	AC	CT	2	2	0	0	4	null	null	cds-3utr	null	null	null	null	chromosome08	2177885	-	Os08t0139100-01
Os08circ02068	HWI-ST620_0166:6:1208:17068:161863#0/2_A_CTCTGTATTGCGAGGAGCTCAATATCCTCACCATGTATGTTCAGGTGTGCAGTGCACTTAGGACCCCTCTTTTCAGGAGGCCAAGAAGAGTTGAAGCAAG	chromosome08	2211470	2211655	plus	AG	GT	0	0	4	0	4	PIF/Harbinger	Tc1/Mariner	intergenic-intergenic	null	null	null	null	null	null	null	null
Os08circ11099	HWI-ST620_0167:7:2305:2299:28806#0/2_A_GATGGATAAGGATGATGTCGTTAGCAGTGATAGTGATGAAGAAGAATAAACAGGTCACTGGTTCCCGGCCCACCAAGGTTACCACTAAGACCAATCGTGG	chromosome08	23808607	23809129	minus	AC	CT	3	1	0	0	4	null	null	cds-cds	null	null	null	null	null	null	null	null
Os08circ11154	HWI-ST620_0167:4:1305:16917:46163#0/2_A_TGTAAATAAGTTACAGAAGATGAGAAACAAGGGTAACAAGAAGAATGAGGTTTTTCGCCAGCTCCACCTCGAGGCTGAGGCTCGCAGTGAGGAGATGAAG	chromosome08	23808815	23809171	minus	AC	CT	4	0	0	0	4	null	null	cds-cds	null	null	null	null	null	null	null	null
Os08circ11640	HWI-ST620_0171:5:1201:16184:74244#0/1_A_GTCGAATTGTACATCGAGAGTGGGAAAATGTCAGTTAAGCAATCCTCAATCATTTAAGTTCTCGGTGTGTTCCCATGAGAATTGATGCTTAGCTAACAAT	chromosome08	23961922	23963213	minus	AC	CT	0	1	1	2	4	null	null	cds-3utr	chromosome08	23961922	-	Os08t0483200-01	chromosome08	23963213	-	Os08t0483200-01
Os08circ14273	HWI-ST620_0167:4:1302:5045:122574#0/1_A_CTGTGCTTATCTTTCCTACGATCGCTATTCTTTTCTTTTCTTTCTCTTCAATTCTGTCTTTAGTCTTTCTTTCATTTGCAAGCCGATCCCTATCTTTGTC	chromosome08	26242813	26243723	minus	AC	CT	3	1	0	0	4	null	null	intergenic-intergenic	null	null	null	null	null	null	null	null
Os08circ14635	HWI-ST620_0171:6:2103:15357:74297#0/1_A_CAGAAACTGGGCATGTGTTGAGGCAAAAAGGTGAAGAGAGAAAAAGTGCTAGGTTAGGATAAAATAAAATAAAATTTTAGTTTGCATATATATACACTGT	chromosome08	26815638	26816144	plus	AG	GT	0	3	0	1	4	null	null	intergenic-intergenic	null	null	null	null	null	null	null	null
Os08circ16957	HWI-ST620_0171:8:1201:20586:83028#0/1_A_CATTAATTGATGTTGCAAAGGAATGTTAGGCTGCTGAGTTGGTTGAGCTTGGAATTGTGACATAAGATGCTGCTGTGATTGCTGAAGTTGGTTATGTTGT	chromosome08	28388563	28389024	plus	AG	GT	2	2	0	0	4	null	null	intergenic-intergenic	null	null	null	null	null	null	null	null
Os08circ02607	HWI-ST620_0171:3:1103:9704:7658#0/2_A_CTTATAGATAAGTTAGCCCTTAGGGCAGGCAATGAGAAGAAGAAGCGGATGGCATCTGAGGAGAAGAAAGCATTGAAGGAAGAGAAATTGAAACAAGAGG	chromosome08	3138105	3139368	plus	AG	GT	1	3	0	0	4	null	null	cds-cds	null	null	null	null	chromosome08	3139368	+	Os08t0154600-01
Os08circ02608	HWI-ST620_0177:8:2204:15323:116203#0/1_A_CTCTTGTTTCAATTTCTCTTCCTTCAATGCTTTCTTCTCATTGCCTGCCCTAAGGGCTAACTTATCTATAAGGTATGTTGCCACTGCAATTTGTTTCTTT	chromosome08	3138245	3139368	plus	AG	GT	0	4	0	0	4	null	null	cds-cds	null	null	null	null	chromosome08	3139368	+	Os08t0154600-01
Os08circ03261	HWI-ST620_0167:5:1301:10135:101896#0/2_A_CGCAGTGGGAGGGCACCTGGATCGAGCAGTCGGAGAACCACCGCAAGGGCGACCACGCCGGCATCGTCCTGGGTGCTGATCTTTGTGAGGCTGATCGCGT	chromosome08	3546242	3546986	minus	AC	CT	1	0	2	1	4	null	null	cds-cds	chromosome08	3546242	-	Os08t0160500-01	chromosome08	3546986	-	Os08t0160500-01
Os08circ04331	HWI-ST620_0166:6:1307:2375:64223#0/2_A_CTTCAGGCACATCTCTTTTCCTCAGTAATTTCATTCCAAAGCATTCTGTGTAACATTGTATGTCAATTCAAGTGCAAAGTTGGTGTCCTCAGGTCCAAAC	chromosome08	5374825	5374949	minus	AC	CT	0	0	4	0	4	null	null	cds-cds	chromosome08	5374825	-	Os08t0191700-02	chromosome08	5374949	-	Os08t0191700-02
Os08circ04357	HWI-ST620_0171:5:2206:15286:95033#0/1_A_GGCCACTCCAGCACAACCTCAGGTGACTTCTCAGCTTCACTACCGCTTGCCATTCTGTATGTCAATTCAAGTGCAAAGTTGGTGTCCTCAGGTCCAAACC	chromosome08	5374825	5375142	minus	AC	CT	0	0	2	2	4	null	null	5utr-cds	chromosome08	5374825	-	Os08t0191700-02	chromosome08	5375142	-	Os08t0191700-01
Os09circ00295	HWI-ST620_0167:4:1305:1693:196347#0/1_A_GCGGATTTTTTTGGGGGGTAAATTTTTTCGGCAAGAGCTCGGGAAGCATCTTCAGCAGATTTAAACGCAACAAATCCAGAACCTCTGCTGACACCATTTG	chromosome09	1214637	1216928	plus	AG	GT	3	1	0	0	4	null	Mutator	intergenic-intergenic	null	null	null	null	null	null	null	null
Os09circ00338	HWI-ST620_0167:7:1204:2438:145097#0/2_A_CTGTTGGGTAGTAAATGCCATAATCCTTGTATTCCTTCTTGGACCTTCAAATCACTTGCTTACAACAAATTCATATTACTAGTACAATATTGCATCCTCT	chromosome09	1221697	1222119	minus	AC	CT	3	0	1	0	4	null	null	intron-intron	null	null	null	null	null	null	null	null
Os09circ03575	HWI-ST620_0167:7:1102:5448:81924#0/1_A_CCCCGGTACAAAATGATTGCATATCCTTTTGTCGTCTTATCAACTGAAATGAGCACTCCTCTCCTTCATCCTCTATTTTATCGTCATCTTTAGACAAATC	chromosome09	12538602	12541369	plus	AG	GT	2	2	0	0	4	null	null	cds-cds	null	null	null	null	chromosome09	12541369	+	Os09t0363100-01
Os09circ04113	HWI-ST620_0167:4:2108:11891:157762#0/2_A_TGATGGATGCGGAGGAGGAGGAGGAGGCACCCACAAACCACCCGAACCCCAAAAGAGAAAAATAAAAAAGCAAACCCAAACCCCCCGAGACCCAATGGCC	chromosome09	13822496	13823346	minus	AC	CT	4	0	0	0	4	null	PIF/Harbinger	intergenic-cds	null	null	null	null	null	null	null	null
Os09circ06987	HWI-ST620_0171:1:1207:4980:35814#0/1_A_CATTACTTTTTAGTTCATGTATATCCTTCTTGCGAGGATTCTGTTTCCCTTGTGAAGCACCAATTACTGCCAAAATACCAAAGATTCCCCATCTTGTGGC	chromosome09	18534663	18538967	minus	AC	CT	1	0	1	2	4	null	Tc1/Mariner	intergenic-intergenic	null	null	null	null	null	null	null	null
Os09circ08225	HWI-ST620_0171:6:1206:1866:33246#0/1_A_GGATGGATTTCTTTTGGATAAACACCCTTGTCCGTCCAAGAACAGGACACCAACTCAACAACTTTGGTGAGCCTCGGCGGCGGCAATGGCAATGGCGGCG	chromosome09	20009324	20010930	plus	AG	GT	0	2	0	2	4	null	null	5utr-intergenic	null	null	null	null	null	null	null	null
Os09circ09890	HWI-ST620_0167:5:1304:18196:37239#0/2_A_GGCAAGGAAATACAACCAATTACTACAACTCTACTGGATATAGCAGCTCTCGAACCTACTTGGAACTTCTTGCTGAACTTCCTTGGCAAAAAGTCAGTGA	chromosome09	21831869	21833647	plus	AG	GT	1	3	0	0	4	null	null	intergenic-intergenic	null	null	null	null	null	null	null	null
Os09circ10330	HWI-ST620_0166:7:2201:3903:59556#0/2_A_CTTTCAAAGAAGGAGCTGGACACATCCTCCATCGGAGAAGAATTGTTGGTCTCCACCAAAACACCACCACTGGATCTACTGATATCACTGATATGTGGGA	chromosome09	22228898	22229146	minus	AC	CT	0	0	4	0	4	null	null	cds-cds	chromosome09	22228898	-	Os09t0542000-01	chromosome09	22229146	-	Os09t0542000-01
Os09circ10639	HWI-ST620_0171:4:1306:10973:140965#0/1_A_CGTCAATCTTCTTGGTGTACTCAGCCTTGAGCTTCTCAGCCTTGGTCACGAAAGGAGCCTTGTCAGCATCAGATACGAGTACTCACTTAGATTACAGACA	chromosome09	22742249	22742830	plus	AG	GT	1	3	0	0	4	null	null	cds-3utr	chromosome09	22742249	+	Os09t0551600-01	null	null	null	null
Os09circ11332	HWI-ST620_0171:3:1101:3491:136056#0/1_A_GTGCGATGGTGGAAGGGAGAGAGATCTGGCATTGTTGCCGCAAGGTTGAAGTGGGTGGTGGTTTGTATGAAGGTGGAACCTATGCCAAGAGTACGCGGAG	chromosome09	23515991	23516674	plus	AG	GT	2	2	0	0	4	null	null	intergenic-intergenic	null	null	null	null	null	null	null	null
Os09circ02095	HWI-ST620_0177:7:2101:13814:182939#0/1_A_GCTTGTTAGAAACACTGATTGCAGCAGCTCTCCCTGCTTTGCTTAGAGGTCTGTCATGATCTCAACCCATGATTTTCCTTCAGCCTCAAGCAATGCAGCA	chromosome09	7054506	7055501	minus	AC	CT	0	0	3	1	4	null	Mutator	cds-cds	chromosome09	7054506	-	Os09t0287300-01	chromosome09	7055501	-	Os09t0287300-01
Os10circ03923	HWI-ST620_0171:2:2303:2648:191802#0/1_A_GGTTTCCTTCGAGGCAAATTGTCAACTTTGCTCTTCTTACTGTGCAGCTTATACCTCATCATCATCAACTTGCCCGTGGTTATCCAAAATCTGAGTTTGC	chromosome10	15332479	15333526	minus	AC	CT	0	0	3	1	4	null	null	5utr-cds	null	null	null	null	chromosome10	15333526	-	Os10t0420900-01
Os10circ04315	HWI-ST620_0166:6:1106:14058:78051#0/2_A_GGTCCGTGATGTTCGCCTTATTATGGACAGGAACTCGCGGCGTTCCAAAGGAGTTGGCTATCTTTGAAGGCAGATGAAAGAGACGTCTATGAGTTCTTCT	chromosome10	16279220	16279630	plus	AG	GT	0	0	4	0	4	null	null	5utr-5utr OR intergenic-cds	chromosome10	16279220	+	Os10t0439600-01	chromosome10	16279630	+	Os10t0439600-02
Os10circ08187	HWI-ST620_0166:7:1205:10772:4320#0/1_A_TCCTGCTCCATCCTGATCGAATTTTGGTCTTTTGGTGCCAGAATCACCACCCTGCTTTGGCTTCCCATTTTGACCTCCAATTGATGTCACAATAATCTGA	chromosome10	20696837	20697270	minus	AC	CT	0	0	3	1	4	null	null	cds-cds	chromosome10	20696837	-	Os10t0521700-01	chromosome10	20697270	-	Os10t0521801-00
Os10circ09464	HWI-ST620_0166:8:2305:3233:199503#0/1_A_CTCTTGTTTGCCAGCATCATCAGAAGATTCAGTGTTGCTGTACTCATCCTCTGCCTCGTCTCCAGGCGCAATTTTTCAGAGTTAGCCTTTTCGTACTCCC	chromosome10	22249168	22251147	plus	AG	GT	0	0	1	3	4	null	null	intergenic-cds	null	null	null	null	chromosome10	22251147	+	Os10t0554100-01
Os10circ10543	HWI-ST620_0167:5:1101:18981:28851#0/2_A_GGTGATGATGTTCCCACTGTGCCGATTGAGGAACTAATTGAGGACCTCATCGCCCTTAGCCCTCAGGTGTCCCGCGATCTTGGAGGCCTTGGACCTATCG	chromosome10	23279956	23280660	plus	AG	GT	3	1	0	0	4	null	null	intergenic-intergenic	null	null	null	null	null	null	null	null
Os10circ01978	HWI-ST620_0166:6:1105:6691:74412#0/2_A_GTTTTTAAGGCACTAACACGGAAGTTCACGGATCCAGAAGCTTTCTACTTACTCAGGCTTGAATATCATCTGTTACCACACTATTCATTCCTCTGCAGTT	chromosome10	7296670	7296909	plus	AG	GT	0	0	4	0	4	Tc1/Mariner	Mutator	5utr-cds	null	null	null	null	chromosome10	7296909	+	Os10t0204300-01
Os11circ04411	HWI-ST620_0177:7:2204:15442:115388#0/1_A_CTTGGGTAAGGCCGGTTGAGCAGTAGGCCTGAACTATAAGGGCAGTATCCCAGCACCGGCTACCAACGTACACCTCCACCCATGGAGTTGTTCTCTTAGA	chromosome11	10400980	10402957	minus	AC	CT	0	0	2	2	4	PIF/Harbinger	hAT	cds-cds	chromosome11	10400980	-	Os11t0286800-03	chromosome11	10402957	-	Os11t0286800-03
Os11circ10042	HWI-ST620_0171:3:1201:9558:136214#0/1_A_CCAGCGCGTTCTTGGACTCCACCTTCTTCTTGTGCTCCTCATCCTCTGACTTGTACTTCTCGGCCTCCTCGATCTTGGGGCCAGCACCGCTGCCGCCAGC	chromosome11	31007410	31007769	plus	AG	GT	2	2	0	0	4	null	null	cds-cds	null	null	null	null	null	null	null	null
Os11circ11146	HWI-ST620_0166:6:2302:18675:176635#0/1_A_CGCCACCCTGATGAACATCGCCGACAACCCAACCAACGTGCACGCCGGAGAGCCGGCGAAGCTGATCAGGCAGCGGTACCGTGAGGCGGCAGACATCATC	chromosome11	31134493	31134693	plus	AG	GT	0	0	4	0	4	null	null	intergenic-intergenic	null	null	null	null	null	null	null	null
Os11circ02839	HWI-ST620_0173:6:2107:11837:90589#0/1_A_GGGAATCATTCGATTTTTCATACCCGGAGCATTAAGGTACCTCAATTGCTTTAATTGACCGAGAGAAGCAGGTACACTATAAAGGCTGACATTATTAGAC	chromosome11	5892701	5893543	plus	AG	GT	4	0	0	0	4	null	null	intergenic-intergenic	null	null	null	null	null	null	null	null
Os12circ04194	HWI-ST620_0167:5:1107:11252:177816#0/1_A_CAACCCTTGCCTGAATCTCATCTTTGCTAGCTGCATCCGCTATGAGTTCAGATCAGGCAGGTTGCACCTTCAATCTCAAAAATGGAAACCAATCCTACAC	chromosome12	10304273	10305341	plus	AG	GT	4	0	0	0	4	null	Tc1/Mariner	cds-3utr	null	null	null	null	null	null	null	null
Os12circ04243	HWI-ST620_0171:5:1206:1269:10042#0/1_A_CTTTTGTCCTTGCTTACAGAACATCTTGTGAGAACATCAACTGTGTAATCGGAATCCTCAGGCCTCCTATCCCAGTCTANGAAGAACCCGTTTTCGGGCC	chromosome12	10471708	10472406	plus	AG	GT	0	0	0	4	4	null	null	cds-cds	chromosome12	10471708	+	Os12t0279000-01	chromosome12	10472406	+	Os12t0279000-01
Os12circ08345	HWI-ST620_0171:3:1204:13152:14093#0/1_A_GGGGGAGGGGTGGGGGAATGAGAATGGTGGAGGGGCGATGGTGGGATCGATCAGCCGTGGCAGCGGGTGATGTGCTCGCAGCTGCGGTTGTACGGGCTGG	chromosome12	21848326	21848784	minus	AC	CT	0	4	0	0	4	null	PIF/Harbinger	intergenic-intergenic	null	null	null	null	null	null	null	null
Os12circ08903	HWI-ST620_0171:4:1201:2832:162202#0/1_A_CAGAATTATGAGATCACATAAAACCAGTAGAGGAAGACAACCGAGAAGGAGTGGAGGAAGCAGGAGCGGCGCAGGTGCTGCTGCTTCCGCAGCCGCGACC	chromosome12	23115991	23116360	minus	AC	CT	0	4	0	0	4	null	null	intergenic-intergenic	null	null	null	null	null	null	null	null
Os12circ10978	HWI-ST620_0173:6:1106:5551:169291#0/2_A_CCGAAGGCATGGCCTGATTATGGGATGCTCTGTGACGGGCGTCAAAAGAGAACATGGAGACTCCCCTTCCCCACCGACACCTTCGACCGCTACGTCTCCG	chromosome12	26250661	26251214	plus	AG	GT	4	0	0	0	4	null	null	intergenic-intergenic	null	null	null	null	null	null	null	null
Os12circ01834	HWI-ST620_0171:4:2106:17728:150952#0/1_A_CAGGTCAGCGAAAGATTTTTGTTGATTGGATGTTAGAGAAGAGCACCTCCTCCTGGCCAACTTTGGTGAAGTTGAACTTGGCAGCATCAAATGGTTGAAG	chromosome12	4534035	4535879	plus	AG	GT	1	3	0	0	4	null	null	intergenic-intergenic	null	null	null	null	null	null	null	null
Os12circ02759	HWI-ST620_0167:4:1203:8653:132272#0/1_A_TGCTCTTGTCAATGAGAGCTGTTATCTGGGCCTTCAATTCCATTTCACGATCACGTAACTCTCCAGCTTGGTGAGTTGCCTGAAGACGATCATCTCGTCG	chromosome12	7103878	7104737	minus	AC	CT	4	0	0	0	4	null	null	cds-cds	null	null	null	null	null	null	null	null
Os12circ03537	HWI-ST620_0167:4:2203:17839:108932#0/1_A_GGAAACAGAAATGATTAACCCCTCGACTACCTTTTTTGATTCGGGTTTCGGCATAACAAAGCTTGCACTGTCTTTTCGCACTTAGGCGCACAGCGTGCCG	chromosome12	8548400	8548986	plus	AG	GT	1	1	0	2	4	null	null	intergenic-intergenic	null	null	null	null	null	null	null	null
Os01circ09837	HWI-ST620_0171:5:2208:7243:13020#0/1_A_GCACCTGGCATCAATGCCAGGGCCTGCTCAACAGGCACATAACAAACAGGACATGCAAAAATAGCAGAAGCAACAACTATCCCCTGGCACTGCCACATCT	chromosome01	11323126	11323572	plus	AG	GT	0	0	0	3	3	null	null	cds-cds	chromosome01	11323126	+	Os01t0304300-01	chromosome01	11323572	+	Os01t0304300-01
Os01circ05808	HWI-ST620_0171:6:2104:9557:175512#0/1_A_GGTTTCTGCAGCTATTGGGGTTCCAGATGTAACTAAACTCTTCTCTTCAGGTCCAGGAAGAGCGAGCCTTGCACTTTAAATATTGTCGGAATTGAAGTTC	chromosome01	6450427	6451908	plus	AG	GT	0	1	1	1	3	null	null	intergenic-cds	null	null	null	null	chromosome01	6451908	+	Os01t0218032-01
Os03circ26515	HWI-ST620_0166:8:2201:17356:57241#0/1_A_CGCCTTCCTTCTTGCTCTCCAACGACAGCTTCTGCATCATGTCAGTAGCCTCTCTTGTGTGTCACGGCTGTTTGTCACAGGCTTATTGTCGTTGTTATCC	chromosome03	31589224	31591616	plus	AG	GT	0	0	2	1	3	null	null	cds-cds	chromosome03	31589224	+	Os03t0748000-01	chromosome03	31591616	+	Os03t0748000-01
Os04circ01094	HWI-ST620_0171:6:1301:4436:120899#0/2_A_TTCCGTCTCCTCCGACTTTACGGATACCAAGTCGACCCATTTCCCTGTATCTACCCTTTGGATGTGTACGAACGCTTATGGGCCGTCGATAGGCTGACGA	chromosome04	5310432	5310790	plus	AG	GT	0	0	1	2	3	PIF/Harbinger || hAT	Mutator || Tc1/Mariner	cds-cds	chromosome04	5310432	+	Os04t0178300-01	chromosome04	5310790	+	Os04t0178300-01
Os07circ07237	HWI-ST620_0166:7:1301:17770:182790#0/1_A_CTAGCCTGTGGGCGATGTTGTGCCAAGAATGCATTTTGAATGATCTTCCCTGATAATGCTGCAATTTATGTGCAGAAATTCGAGAATCATGTCCAACAGA	chromosome07	16000486	16002434	plus	AG	GT	0	0	3	0	3	null	null	intron-cds	null	null	null	null	chromosome07	16002434	+	Os07t0447800-01
Os07circ08039	HWI-ST620_0166:7:2304:8860:53069#0/2_A_TTCACCAGCATCCAGGAGAAGACTCCCTTAAGTGATATTGCGGACTGGCTCCAACAGTATTGGGTGGGAAAATTGACCCTGCTCTTTTTGAAGTCCTCTA	chromosome07	18067990	18068858	plus	AG	GT	0	0	3	0	3	null	Tc1/Mariner	cds-cds	chromosome07	18067990	+	Os07t0479200-01	chromosome07	18068858	+	Os07t0479200-01
Os07circ20290	HWI-ST620_0166:8:2305:14587:42749#0/1_A_TGGCCAACCGTAAAATGAGTAGTATAAATAGGTACTGAAGGAGACTCAGATAATATGGAAAACTATCAAATGAATCTGATATATCACTTGCATTAACGAC	chromosome07	29086249	29087425	plus	AG	GT	0	0	1	2	3	null	null	cds-cds	chromosome07	29086249	+	Os07t0672500-02	chromosome07	29087425	+	Os07t0672500-02
Os08circ01057	HWI-ST620_0166:8:1207:20885:149019#0/1_A_GTGATCTTCCATGTCTTCTGTCAGTTTGTCATAGAGCTTTGGCCCATGTTCGTGAAGTGCCAGATTATAAGCAGTCCTTGTTAGTTTTCTCTGATGAACA	chromosome08	1240558	1241859	plus	AG	GT	0	0	3	0	3	null	null	cds-3utr OR intergenic-5utr	null	null	null	null	chromosome08	1241859	+	Os08t0122800-01
Os12circ05177	HWI-ST620_0177:7:2303:19183:194958#0/1_A_GCTCAGGGTATGGAGTGGACTCCATAGACTCTCCTCCTCCTAAAGTCATTTGCCACATTGCTTAGCATAAGGATTCCACCCTGGAACTTGAACAAGGCCC	chromosome12	12353475	12355881	plus	AG	GT	0	0	2	1	3	null	null	cds-cds	chromosome12	12353475	+	Os12t0405100-01	chromosome12	12355881	+	Os12t0405100-01
Os01circ09085	HWI-ST620_0167:5:1102:8914:100609#0/2_A_TTATATCCATACGGTGTAATATACAACCTCTGCCACAACCGCAGCCGCAACCACAGCCTTTACCGCTACCAGGCCCACAACCATTACCGCAACCCGGCCC	chromosome01	10182536	10183062	minus	AC	CT	2	1	0	0	3	null	null	intergenic-intergenic	null	null	null	null	null	null	null	null
Os01circ01116	HWI-ST620_0166:6:1101:16643:36910#0/2_A_TTCTTGACTCCATTTGACAAGAAGGATAGACGAGGAAGAGCTGGTCGAGTCCAACCAGGGGAGTGTTACCATCTATATCCACAATGCGTGTATGAAGCAT	chromosome01	1025722	1026333	plus	AG	GT	0	0	3	0	3	null	null	cds-cds	chromosome01	1025722	+	Os01t0118100-01	chromosome01	1026333	+	Os01t0118100-01
Os01circ09234	HWI-ST620_0167:4:2101:7467:91565#0/1_A_CACAGTGAAGTTCTGTGGTGGAGTGCCGATGCCGATCTCTCCAAAGTACTGCGTGTCCAGTTGAGTAGTCATCAATAAGAAGATCCCCCATCTCAAACTG	chromosome01	10541814	10542790	plus	AG	GT	2	1	0	0	3	null	null	intergenic-intergenic	null	null	null	null	null	null	null	null
Os01circ09363	HWI-ST620_0167:5:1303:11796:32889#0/2_A_CAGGAAAAGCCTACTCATATCAATGCTTTTCCTGCTTTGCTTCAATTATATTGCTCCTGAGGTTTTGCAGAACCGAGGTTACGATGGCTCATTGTCAGAT	chromosome01	10673574	10674406	plus	AG	GT	3	0	0	0	3	null	null	cds-cds	null	null	null	null	null	null	null	null
Os01circ09365	HWI-ST620_0166:6:2103:11627:157802#0/2_A_GAAGAAATCCCATGGAGATCCTATATTGTATAGACAGCTAAAGGTCATGAAAAATGGCAGGGGTTCAAAGAACCTCAGGAATCCATCATCATTCTTGGTC	chromosome01	10674830	10675070	plus	AG	GT	2	0	1	0	3	null	null	cds-cds	chromosome01	10674830	+	Os01t0292200-02	chromosome01	10675070	+	Os01t0292200-02
Os01circ09997	HWI-ST620_0177:6:1101:2844:137189#0/2_A_TCAGCCTTCTGGCACAAAGGAGGGGTTACTCAAACAAGATTCCTGATTTACCAGCTCATTTTTACATATAGTTCAAACTTAGAGAGAGAAAGAAAGTTGA	chromosome01	12006961	12007091	plus	AG	GT	2	0	1	0	3	null	PIF/Harbinger	intergenic-intergenic	null	null	null	null	null	null	null	null
Os01circ00469	HWI-ST620_0171:4:2204:6991:60467#0/1_A_GTCTTCCTGATCTGCTCCTTGTAACGGCCGAGCTCTTCGTCCAGCTTCTTGATCTTGTCGTCCACACTCTCCCATTAGTTCTTCCTCATCAACATCGTCA	chromosome01	170764	171903	minus	AC	CT	1	1	0	1	3	null	Tc1/Mariner	cds-cds	chromosome01	170764	-	Os01t0103000-01	null	null	null	null
Os01circ12686	HWI-ST620_0167:5:2202:9996:69719#0/2_A_GCCGTCACCGTGCAGCTGCCGGGAGGCGAGCGCGTGCCGTTCCTGTTCACCATCAAGAATCTGGTCGCCAACAAGTGCGCCGATGCCGCCAAGCTCGCCG	chromosome01	18980264	18980863	plus	AG	GT	3	0	0	0	3	null	null	cds-cds	null	null	null	null	null	null	null	null
Os01circ13078	HWI-ST620_0167:6:2205:18603:56864#0/2_A_TGCAGCCGTCGGACACAGACCTCGGCGCCAAGAACGCGCCACCCGAGTTCCAGAAGACCAAGCTCATGACCCGCCTGACCTACACCCTCGACGAGATCGA	chromosome01	18980666	18981157	plus	AG	GT	2	1	0	0	3	null	null	cds-cds	null	null	null	null	null	null	null	null
Os01circ13170	HWI-ST620_0171:5:1207:2977:56790#0/1_A_GTTGAGTATTCTCTGTCTGTATTCTCTGTGCCTTTGAACCGAGTTCAACATCCCTGTCTTTCCCATACTCAACAACACAAGCATGGTGTGTATCTAATGT	chromosome01	19028722	19030398	plus	AG	GT	0	0	1	2	3	null	null	cds-cds	chromosome01	19028722	+	Os01t0502400-01	chromosome01	19030398	+	Os01t0502400-01
Os01circ01948	HWI-ST620_0167:7:1101:16159:124291#0/1_A_GATTTTGTGCAGTGACATATTGCTGTGGGACTGGCTGTTGCTGCTGTGGTGGTGGGGGTTGCTGCAGTTCAGGCTGCTTCACGGCCATCTGAGGAATTGG	chromosome01	2084257	2084616	plus	AG	GT	3	0	0	0	3	null	null	intergenic-intergenic	null	null	null	null	null	null	null	null
Os01circ14381	HWI-ST620_0166:8:2106:8076:147727#0/2_A_GCAAGTTACAGTAAATTGGCGACCAGGAACCAATCAGTCAGCCGTTTTACCAAGTCAGTTGAAGGCCCATATAGTGGTGACCCCATTGAGGGTCCAAGGG	chromosome01	22297374	22297890	minus	AC	CT	0	0	2	1	3	null	null	cds-3utr	chromosome01	22297374	-	Os01t0551100-01	chromosome01	22297890	-	Os01t0551100-01
Os01circ02093	HWI-ST620_0166:6:2307:3815:140652#0/2_A_GCGCCGACGACTTCCTCAATTCGGACGGCGGCGACAAGAACGATTACGACTGAGCACAAGGCGGCGGCGTACAGGATGACCGGCGGGTTCAGGAGAGCGC	chromosome01	2261111	2261216	plus	AG	GT	0	0	3	0	3	null	null	cds-cds	chromosome01	2261111	+	Os01t0141900-01	chromosome01	2261216	+	Os01t0141900-01
Os01circ14924	HWI-ST620_0167:4:2104:14598:193086#0/2_A_CTATACTGCAGGTGCTTTTGCATAAATGACAACAAGTATGCGGATTGGCCACCTCTTCCAACTGTCCCTGATGAAATTGAAGCTTGCAAACCAGCACTTG	chromosome01	23331382	23333437	minus	AC	CT	3	0	0	0	3	null	null	cds-cds	chromosome01	23331382	-	Os01t0566900-01	null	null	null	null
Os01circ15315	HWI-ST620_0177:8:1105:12017:180869#0/1_A_TGGTGCATTATCCCCGGCGGCGAGGTGGCCCGGTGCTCGTCGGGGCTGAGTGGCCCTCCTCGTGTACAGGCTCCTGATCGATGAGTCGCCCTCGTAGCCA	chromosome01	24169982	24170920	plus	AG	GT	0	3	0	0	3	null	null	cds-cds	null	null	null	null	null	null	null	null
Os01circ15676	HWI-ST620_0171:6:2104:17684:108687#0/2_A_GGATGATAAAAACGGCAGCTTTTGATCGCCAGATTGGGGGTAGGAGGAGTAGTCGAGAGGGGCATAGACCTGGTCTACGGCGGTGGCTCCATCGGCCTCA	chromosome01	24588775	24589011	minus	AC	CT	0	0	2	1	3	null	null	cds-intron OR 3utr-intergenic	null	null	null	null	chromosome01	24589011	-	Os01t0588900-01
Os01circ02436	HWI-ST620_0171:5:1106:8992:159587#0/1_A_CTGAAATTTCCTTAGCTTTCGCCGAGCATCCTTGCTCAGAAGAGCCTTCGTGCACCACCTTGTCTCCTCCTCCTCTCAGAATTGTGAAATAGCTTCATTT	chromosome01	2615926	2617935	minus	AC	CT	2	0	0	1	3	Tc1/Mariner	null	cds-cds	null	null	null	null	null	null	null	null
Os01circ16976	HWI-ST620_0166:6:1203:7767:37327#0/1_A_CGGGGACTTTCCAGGGCTACAAAGAGCCCGCTCACTTCGTCATGTGCTCGTTTTGCACACAATCGTAAGCCCCGTTCTGTTAATCCGGAGATGGATCAAG	chromosome01	26246470	26246711	minus	AC	CT	0	0	2	1	3	null	null	intergenic-intergenic	null	null	null	null	null	null	null	null
Os01circ17022	HWI-ST620_0167:4:2303:12847:161195#0/2_A_TCAAAGGGTGTGATGACGCAAAGAAAGAACTCGAGGAGGTTCTTCGACTGGGTGGTGTCCGGGGACTGGATGAGCTGGTGGCCCTTCTGGCGGCCCGACC	chromosome01	26250576	26253395	minus	AC	CT	3	0	0	0	3	null	null	intergenic-intergenic	null	null	null	null	null	null	null	null
Os01circ17206	HWI-ST620_0167:5:1107:8203:183494#0/2_A_GATGAGATAGCAAACATTAAAAAGAGATTGGAAGAAGAGGAGCTGGAAAGGTCCATGCCAAGAATCTTATGGCTTCAGAAACCATTGAAGGGTATGCTGT	chromosome01	26448033	26448400	minus	AC	CT	3	0	0	0	3	null	null	cds-cds	chromosome01	26448033	-	Os01t0622033-01	null	null	null	null
Os01circ17278	HWI-ST620_0166:8:1203:1393:122399#0/1_A_CGGTTCCGGTCATCTGCTGCTGCCTAATGCCTTCTTTATCCGTGTAAGTTTGGCAGGTGAGGACTTGTCGGTACAATGTAATGTTTGTGATGTCTTGTGG	chromosome01	26475748	26475847	minus	AC	CT	0	0	3	0	3	null	null	cds-cds	chromosome01	26475748	-	Os01t0622700-01	chromosome01	26475847	-	Os01t0622700-01
Os01circ02598	HWI-ST620_0167:7:2105:11162:172633#0/2_A_CTGGCACACAGCAAGATGAAAATAGTTCAGTACACTACAAAAGATCAAAGAGGAAGCGCATGGTTCAGTAGGTGTGACAGAACCTGATTGGATTTCATTT	chromosome01	2772512	2772911	plus	AG	GT	3	0	0	0	3	null	null	cds-3utr OR 3utr-intergenic	null	null	null	null	null	null	null	null
Os01circ18563	HWI-ST620_0171:2:2305:6132:156716#0/1_A_CCTGCATGCATGCCGGAGACGATCTCTTCAACATCCAGCTCAAGGCGAGATGCGTTCACCTCACCATCCCCAGGGTTATCATCAATTAAATTATCAGTCT	chromosome01	28332076	28332198	minus	AC	CT	0	0	1	2	3	null	null	cds-cds	null	null	null	null	null	null	null	null
Os01circ18706	HWI-ST620_0166:7:2101:14882:94198#0/1_A_GGAGAACTAGGAACAGCAGGAGAATCCTCCTTCCCCAGGGTTATCATCAATTAAATTATCAGTCTCTCCTTCCATACCTTTCTCAATGCCTGCATGCATG	chromosome01	28332115	28332238	minus	AC	CT	0	0	3	0	3	null	null	cds-cds	null	null	null	null	null	null	null	null
Os01circ19377	HWI-ST620_0167:6:2106:10146:30261#0/1_A_GTGGAAGTGACAAGTGCTTGGCAATCTCAGTGTTTTTTACTACGAGTACGCAGGGCACTGCAACATTCTTCATGACAGAACCTCTGGCACTCATGCTTCG	chromosome01	28777432	28777640	minus	AC	CT	3	0	0	0	3	null	null	ncRNA-ncRNA OR ncRNA-intergenic	null	null	null	null	chromosome01	28777640	-	Os01t0662600-02
Os01circ19604	HWI-ST620_0171:2:2302:8380:29383#0/2_A_CATCCACTCTTGGCAAATCCAGTGAACCACAGAAATATACGAATCCTGCCACCTGAGGTAGAGGTGATGATAAATCATAGTTAGTGACTTAGCTTGCAGC	chromosome01	29035699	29037148	minus	AC	CT	0	0	0	3	3	null	null	5utr-cds	chromosome01	29035699	-	Os01t0667700-01	chromosome01	29037148	-	Os01t0667700-03
Os01circ19799	HWI-ST620_0167:5:2202:7510:18307#0/1_A_TAGATGTAGCAGAGGCACTCCGGGACGAAGCGGAGATTGGCGGCCTCCCGCTGCAGTTGCTGATCATATTTCACAAGGACAGAGAAATATTCTGTTTCAC	chromosome01	29338827	29341700	minus	AC	CT	3	0	0	0	3	null	null	intergenic-intergenic	null	null	null	null	null	null	null	null
Os01circ19902	HWI-ST620_0167:5:2208:11378:104107#0/2_A_TGAGGAAGATAGGTCACGGAGATACTGAGATTGCTGCAAGCTTTGGTGCAGGGCTGATTGGATCTGTCCTGTATCTCCGCATGCTTGGGACCAGTGTGGA	chromosome01	29408558	29409678	minus	AC	CT	3	0	0	0	3	null	null	cds-3utr OR intergenic-intron	chromosome01	29408558	-	Os01t0673800-01	null	null	null	null
Os01circ21416	HWI-ST620_0167:5:1301:11884:28267#0/2_A_CAACAGGAGAAAATAAGAATCAGCTGTTGTCCATGATGTTAATGAAAATATTGAAGATCATGTATCCATGTCCAGGAAGAATTACCTTAATTCATCTGGT	chromosome01	31040680	31040924	plus	AG	GT	3	0	0	0	3	null	null	cds-cds	null	null	null	null	null	null	null	null
Os01circ21861	HWI-ST620_0171:5:2301:4723:6212#0/1_A_GTCATCATGGCTTTGCTTTGTCATAAGCAGCAAAGAATCTCTTGCTGTTGCATCTTTTTCAAGTAGATACTAACTTTTGTGCTGTGTCTTGGAGTAGGTG	chromosome01	31385973	31387856	minus	AC	CT	0	1	0	2	3	null	null	intergenic-intergenic	null	null	null	null	null	null	null	null
Os01circ22016	HWI-ST620_0167:5:2102:5092:35483#0/2_A_CCCCGACATACAAGTACAAGGTTAACTCAGAGAAATACACGAGTGATGAGCCAAAATCTGGAAGGAGAACACCTGCCTGGGATCAATAGCAGTAAGCATG	chromosome01	31563638	31564691	plus	AG	GT	1	0	1	1	3	null	Tc1/Mariner	cds-cds	chromosome01	31563638	+	Os01t0716800-02	chromosome01	31564691	+	Os01t0716800-01
Os01circ22220	HWI-ST620_0166:8:2307:2567:41917#0/2_A_TTCTCCTGAAAACCGGCTGCTAGTGATGGGAGGAGTTGGAAAGTCTACAGTTGCTGTAAATATTGCATATACATTAGCTGGTATGGGGGCCAGGGTTGGA	chromosome01	31739287	31739430	plus	AG	GT	0	0	3	0	3	null	null	intergenic-intergenic	null	null	null	null	null	null	null	null
Os01circ24059	HWI-ST620_0171:1:1301:15796:10063#0/1_A_CTGCTTGTGTTATTGCTAGATCTTGTTGGGCTTGAATTGCTTCCCGTTTCTCCTCTTCAAAGAAAGCCTTTTCTTTTCGGCTTGCAGCCTATCTGCATCA	chromosome01	34059469	34059650	minus	AC	CT	2	0	0	1	3	null	null	intergenic-intergenic	null	null	null	null	null	null	null	null
Os01circ24108	HWI-ST620_0177:8:1105:8934:123368#0/1_A_CAAAATCATGTTTTCTCCTCTCCAAGGCTATAGCTTGTTCCTGATTCAACTGCAACATGTTCTAATTTTGTGTTGATCATCTCCTTCTGAGAATTGATGT	chromosome01	34059030	34059999	minus	AC	CT	1	2	0	0	3	null	null	intergenic-intergenic	null	null	null	null	null	null	null	null
Os01circ24109	HWI-ST620_0167:7:1202:14638:84140#0/1_A_GCCATCTCAGATTCAAAATCATGTTTTCTCCTCTCCAAGGCTATAGCTTGTTCCTGATTCAACTCATCTGATCTCCCTGCCAACGCCTTTTCCTTGCTTG	chromosome01	34059763	34059999	minus	AC	CT	2	0	1	0	3	null	null	intergenic-intergenic	null	null	null	null	null	null	null	null
Os01circ24173	HWI-ST620_0166:7:2208:9478:99569#0/2_A_CAATTTCCTCATACAAGGATGCAATTTCTTCGACTTTAGAGAATCACCAGTGTACAAATTTGAACCTGGCATATCGAAACAAGAGCGAGCGGCGATACAT	chromosome01	34081752	34082520	plus	AG	GT	1	0	2	0	3	Tc1/Mariner	null	cds-cds OR 5utr-5utr	chromosome01	34081752	+	Os01t0767700-01	chromosome01	34082520	+	Os01t0767700-01
Os01circ24852	HWI-ST620_0166:6:2306:17812:46023#0/1_A_GCGCTACTCTCTGTTTTGCCCTCAAATGGTTCCTTGGTAATCGGATCGATATTCCCTTGGGCAATGCCTTTAGCAACAGTAGAAGTAATTTGTCAATACG	chromosome01	34625954	34626586	plus	AG	GT	0	0	2	1	3	null	null	cds-cds	null	null	null	null	chromosome01	34626586	+	Os01t0777300-00
Os01circ03144	HWI-ST620_0166:6:2204:9945:114798#0/1_A_CTGGTGGAAGTTCAGACATTTCCAAGAAGGGGAGCGATGGATCATCATCATCTTCTTCAGAATCTGATTCTGAGACACAGTCTGCTCCCCCAACTCCTAA	chromosome01	3479923	3480096	minus	AC	CT	0	0	3	0	3	null	null	cds-cds	null	null	null	null	null	null	null	null
Os01circ26408	HWI-ST620_0171:2:1203:11477:10550#0/1_A_TTCGCTAGGAAGACCAACAGCTGTTCCATGAGCCTTCACTAATCTCCACCACCAGATGCAATCCGTGCATCAATACCCTTGTCACGAAGCTGAGAAAGAT	chromosome01	36534890	36535511	plus	AG	GT	1	1	0	1	3	null	null	cds-cds	null	null	null	null	null	null	null	null
Os01circ27438	HWI-ST620_0173:6:1306:17176:10249#0/1_A_GGGCGAAAGGAACAGCAGCGGGTCGAACTCCTCCTTCTTGGGTTGTTTCTTTCCACGACCCTTGCCATGGCTGGACCCTTTGCCATGGCCTCCGCCTGAA	chromosome01	37888453	37889646	plus	AG	GT	3	0	0	0	3	null	null	cds-cds	null	null	null	null	null	null	null	null
Os01circ27819	HWI-ST620_0167:4:2108:12544:175191#0/1_A_TGTGACAGTTCACTCCCAGGAATGAGCACCTCGGCCACAGATACATTGTAGTTGGGAATGAACACCACGACCAAATCCAGAATTTCCTTCAAGAGAATCC	chromosome01	38400852	38401432	minus	AC	CT	2	1	0	0	3	null	null	cds-cds	null	null	null	null	chromosome01	38401432	-	Os01t0851700-01
Os01circ29118	HWI-ST620_0173:6:1204:6135:17522#0/1_A_GCTCTCCTCCTTGAACGATCCGGTCCCCTCTATCGCCCCGGCCTCATCACCTTGAACTCGCGCGCGCGCAGGAACTTGAGGAGCACCGTGTCGGTGCGCT	chromosome01	39678999	39679705	plus	AG	GT	3	0	0	0	3	null	null	cds-cds OR intergenic-intron	null	null	null	null	null	null	null	null
Os01circ30192	HWI-ST620_0171:5:1103:17923:132756#0/1_A_CTTGAGCTTCAGCTCCCGGAGCTTCTAGAACTGATAACGTTGATTAGTTGAGGTGTTTTTTTGCAGCTGAGAGTCATCCACATTCTCAATAATCCCAGTA	chromosome01	40684468	40685414	plus	AG	GT	0	0	0	3	3	null	null	cds-cds	chromosome01	40684468	+	Os01t0896300-00	chromosome01	40685414	+	Os01t0896300-00
Os01circ31807	HWI-ST620_0171:7:1104:7552:192371#0/1_A_CTCTGCTGAAGGTGAAATCTCCAACTCCGTGACCCTTGAAGAAATTCTCCACCATAACGCTCCCATAAGTCGTTCTCCCCAATGAGATGTCTCCATTTAT	chromosome01	41905836	41908294	plus	AG	GT	2	1	0	0	3	null	null	intergenic-cds	null	null	null	null	null	null	null	null
Os01circ04186	HWI-ST620_0167:7:2303:20252:142772#0/1_A_GGCTTCAGATGCAGGAACTTCCAGCTGCCTTTTGTACGATGATACATAGCCACAAAAATTCTCATAAGGCATGCTTCAGATGGACTCCCACGAGGTAAAT	chromosome01	4331137	4332248	minus	AC	CT	3	0	0	0	3	null	null	cds-cds	null	null	null	null	null	null	null	null
Os01circ00867	HWI-ST620_0171:8:1102:11093:134440#0/2_A_GATGATGAGGGTGAGGAAAGCGCACAAAGGGCTGCAGAGAACATTCCTGTTGCTAGGACTGAACAGCATGGCAATGCTAAAGCAAATTTGGAACCAACAT	chromosome01	515338	516185	minus	AC	CT	2	1	0	0	3	null	null	cds-cds	null	null	null	null	null	null	null	null
Os01circ05730	HWI-ST620_0171:8:2105:9334:121561#0/1_A_CGCCTCCTCCCTCGCCGGGCTCCGCGCAGCCGGACGCCGCCTTCCTTTACCCAGCATATCCCATCATTCAATCATTAGGTGAAATTCCCCCCACTACCAG	chromosome01	6442158	6442694	plus	AG	GT	0	1	0	2	3	null	null	cds-3utr	null	null	null	null	chromosome01	6442694	+	Os01t0217900-00
Os01circ06871	HWI-ST620_0171:6:1202:17072:137628#0/1_A_TGATCGATGTGTATCAGCCGGCGGCACCGCACAAGTCGACGGGTTGCATTGCCTCTTCTCATCGTGGAGACCGGCCGGAGCAGAGAGGAGAGGTTTTTTT	chromosome01	7686180	7686312	minus	AC	CT	0	2	0	1	3	Tc1/Mariner	Tc1/Mariner	cds-3utr	null	null	null	null	null	null	null	null
Os01circ08024	HWI-ST620_0166:6:2102:21071:115014#0/2_A_CTTTCTTGAGCTAATTACTGGACGAAGAGCGCTTGACAGCAATCGGCCACCTGATGAACAAGACTTGGTTGCATGGTGGAATATTCAAAGTCGTCAGAGA	chromosome01	8683014	8685010	plus	AG	GT	0	0	3	0	3	null	null	5utr-cds OR cds-intergenic	chromosome01	8683014	+	Os01t0259200-02	chromosome01	8685010	+	Os01t0259200-02
Os01circ08412	HWI-ST620_0167:5:1202:19827:13637#0/2_A_CCCTCGAGGCGGGGAGGAAGAAGGTGTACGAGGCCAAGAGAGAAACCCCCCGCACGAAGCAAAGAAGCCGCAACCGCAAGCCCCAAGAGCGAAACCGTAA	chromosome01	9327747	9328288	minus	AC	CT	3	0	0	0	3	null	Mutator	cds-cds	null	null	null	null	null	null	null	null
Os02circ10841	HWI-ST620_0167:5:1107:10160:171365#0/1_A_CTTGCCCACGGCCATGGCTGCTCCTCCCCTGCCACCGCCTCGTCAGTCTCAGCAGGCCTGTCCAGCTTCATACCGACATCTTCCTTGTAGTCACCGTGTA	chromosome02	10851973	10854600	minus	AC	CT	1	2	0	0	3	null	hAT	cds-cds	null	null	null	null	null	null	null	null
Os02circ02469	HWI-ST620_0171:5:2303:9591:79176#0/1_A_GTGAAATTGAGAGCTTTAGATAGGTACCTTTAGACTTTAGTGTCTTTGTAGTAATGAACTTAAAAATATAAATGCACTTTAATGTAGAAAAGAATTCCAG	chromosome02	1168565	1169372	minus	AC	CT	0	0	1	2	3	null	null	intron-intron	null	null	null	null	null	null	null	null
Os02circ02527	HWI-ST620_0171:4:1206:19245:175408#0/1_A_GGCCGGAGTACGCGAGGTGGTTGGTGAAATGGTGAGGTGAGGACGGGGATAAGGAGGGGAGAGAGCGGAGTGATGATGGCGTGGACGGCGGCGAGCGGCG	chromosome02	1186210	1186334	plus	AG	GT	1	2	0	0	3	null	Tc1/Mariner	intergenic-intergenic	null	null	null	null	null	null	null	null
Os02circ11619	HWI-ST620_0166:6:1104:17111:123364#0/1_A_GCACTGGCAAATCCTATAACTGATTTGTCTGTAGCATCATCTTCACTGCTACTGCTATCTGAACATATATTCACTGCTGTTGTTGCTGATTAATTAGCTG	chromosome02	12475987	12477307	plus	AG	GT	0	0	3	0	3	PIF/Harbinger	null	cds-3utr	null	null	null	null	null	null	null	null
Os02circ11931	HWI-ST620_0166:6:2204:15074:190514#0/2_A_GCGGGAACTTGACAAGCTATCTTCACACGTCTGAGCTAACCGTCTGTGGCACAGTATCTAATGGCTGGGGTCATAAAATGGAAAATGATGTCATGTGAAC	chromosome02	13186432	13190349	plus	AG	GT	0	0	2	1	3	null	null	5utr-cds	chromosome02	13186432	+	Os02t0326700-01	chromosome02	13190349	+	Os02t0326700-01
Os02circ12299	HWI-ST620_0177:7:1302:3469:21351#0/2_A_CTTTCCCGATTTTATCCTGTTCTAGAGGTAAACTCAATAGCATAATAAGGGAGCAAGGTCTTCGAGATGTTGGACAGCTAGAGCAAGATCTTGTATTTGG	chromosome02	15693575	15694939	minus	AC	CT	0	0	3	0	3	null	PIF/Harbinger	cds-3utr	chromosome02	15693575	-	Os02t0452500-01	chromosome02	15694939	-	Os02t0452500-01
Os02circ14670	HWI-ST620_0171:8:1102:4346:118304#0/2_A_TCATGCCCAGAGAATACAGAGGGAGAGGCTAAAGATTGTCAAACCACAGCATTTCTTGCCTGTTCATGGAGAACTCCTGTTTCTTAAAGAACATGAATTA	chromosome02	20838014	20839435	plus	AG	GT	2	1	0	0	3	null	null	intergenic-cds	null	null	null	null	chromosome02	20839435	+	Os02t0539600-01
Os02circ16212	HWI-ST620_0171:3:1204:17918:133388#0/1_A_GGCGAGAGGAGGGACAGCTGCAGTGCTCTTTGGTGTCACCGAGGGGACGTCCAATGTCCGCCGAGAAACCGATGATCATGACGGAGATGCAGATGATGAG	chromosome02	22975993	22976830	minus	AC	CT	0	3	0	0	3	null	null	cds-cds	chromosome02	22975993	-	Os02t0576600-01	null	null	null	null
Os02circ17710	HWI-ST620_0166:6:2201:12200:55198#0/2_A_CCATCACATAGAATTCCCCAAAAGCGTGAACAGAGAAGACTGGCAGAGTACACGCTGCTAGGAGGTTATTTGAGTACTTAGAAACCAACGGTTTGAACTT	chromosome02	24481689	24482017	minus	AC	CT	1	1	1	0	3	null	null	cds-cds	chromosome02	24481689	-	Os02t0603800-02	null	null	null	null
Os02circ17846	HWI-ST620_0166:6:1101:9804:124277#0/2_A_CAATAAGATGGAACCCAAAAGGGCGATTTATGCCGGCCAGAGCAACAATATTCAACAAAAAATGCAACCCTCTTCTGGAGCTCGGTGAAGGCCCCTACAA	chromosome02	24578117	24578218	minus	AC	CT	0	0	2	1	3	null	null	intergenic-intergenic	null	null	null	null	null	null	null	null
Os02circ18173	HWI-ST620_0167:5:1304:17721:105471#0/1_A_GGGGGTGGGGGGGCGAGAAGAGCTAGGTACGGGGCGGAGGCTCGCCGGAGGCAGCTCTGAGCTAGCTTCTTCAAGTGTTGGAACAACTTTTGCTTTATCC	chromosome02	24890475	24893346	minus	AC	CT	2	1	0	0	3	null	PIF/Harbinger	cds-3utr	null	null	null	null	null	null	null	null
Os02circ18360	HWI-ST620_0177:6:1107:17269:71158#0/2_A_TGGCTTAGCAGCACTTACAAAATGGAATAGAAGTTATTCGATGATTTCCCAGGATTTTGACTAGGCCACAGATGGTTACAAGTTGCATTCATGGTCAAAA	chromosome02	24995665	25000422	minus	AC	CT	0	0	3	0	3	null	null	5utr-cds-acrossGene	chromosome02	24995665	-	Os02t0613200-02	chromosome02	25000422	-	Os02t0613200-02
Os02circ19066	HWI-ST620_0166:7:1306:20604:129047#0/1_A_GGTGGGTTATAAATGGTCTTGCTTCAGCACCACCTGCTGCTCCCTCATTGAGAACATGTCCAACAGATGAACAAGCTTGCAATGAGATATTCTCATTGCT	chromosome02	25707975	25710683	minus	AC	CT	0	0	2	1	3	null	null	cds-cds	chromosome02	25707975	-	Os02t0623500-01	chromosome02	25710683	-	Os02t0623500-01
Os02circ20414	HWI-ST620_0166:6:2301:19485:10487#0/1_A_GCATTTATCCTTGTCACTTATCATCTCACAGCTTCATCAGCTTCACCCTGGAATACAATCTTTTGGCCATGTTGCATTCCCTTCTCAACATGAACCTCCA	chromosome02	27378133	27378275	plus	AG	GT	0	0	3	0	3	null	null	cds-cds	chromosome02	27378133	+	Os02t0656500-01	chromosome02	27378275	+	Os02t0656500-01
Os02circ21002	HWI-ST620_0166:8:2306:3071:39760#0/1_A_GCTTGGGCTAGTAGCAGCTTTCTTTTCTTGATTTCCCGTCACTGCAAGAAGCTGGTAAGGTTCTCTTCTTCTTCGCTGGTGGCGCCGCCACGGCCGCTTG	chromosome02	28172687	28173047	plus	AG	GT	0	1	2	0	3	null	null	5utr-cds	chromosome02	28172687	+	Os02t0672100-01	chromosome02	28173047	+	Os02t0672100-01
Os02circ21205	HWI-ST620_0173:6:2303:17807:127596#0/2_A_GCCCAATAATCATCGAGGATCTTTCACCACCTGGTCAGATGCTTGTGAAGAAAAGAGCCAGACCGGGTGAGAGCACACGGCCAAGACCAAAGGACCGGCA	chromosome02	28276548	28277113	plus	AG	GT	3	0	0	0	3	null	null	cds-cds	null	null	null	null	chromosome02	28277113	+	Os02t0673500-01
Os02circ21435	HWI-ST620_0177:8:2301:4313:84461#0/1_A_CTGGTTCTTTCCTTCAGGCGCTTGTTGCTCTGAAGAAGGGTGCACATCTCCTCTGCAGGTTGTGTCGAACGAAGACTGACTGCCTGCCTCTCTCATCTTT	chromosome02	28870472	28871334	minus	AC	CT	0	1	0	2	3	null	null	5utr-5utr	null	null	null	null	chromosome02	28871334	-	Os02t0684800-01
Os02circ21933	HWI-ST620_0173:6:2105:5527:116138#0/1_A_GGTGGTGCATGGGGAGTGCAGGGAGGTGGTGGCATGTAGGCTGGAGATCGCCATCTTTGCTTCTGGCCTTTCTACCTGCTCATACATGAGATCAAAATCG	chromosome02	29557991	29558431	plus	AG	GT	3	0	0	0	3	null	null	5utr-cds	null	null	null	null	null	null	null	null
Os02circ22020	HWI-ST620_0173:6:1205:9988:199732#0/2_A_GATGCAGTGATTGAAGTTCTGCCAACCCAGCTTATTCCTGATGACAATGAAGGAAAGGTGTGACTGCCCTGGACCCTAGGGCAAACGATTTTGATCTCAT	chromosome02	29558379	29559355	plus	AG	GT	2	1	0	0	3	null	null	cds-cds	null	null	null	null	null	null	null	null
Os02circ22073	HWI-ST620_0173:6:1101:5258:8066#0/1_A_GTCACTGATGAGTGTGTTTGAGTCTGGGTTGCTTAAATGGCTCTCAACATAGATAAGCTCATCTAGTCTGTCAAATTGGCCATCCATCTCCAGCACTGAT	chromosome02	29558288	29559828	minus	AC	CT	3	0	0	0	3	null	null	5utr-intron	null	null	null	null	null	null	null	null
Os02circ22337	HWI-ST620_0167:4:1108:20875:66699#0/2_A_TCCCCAAGGGCTGGAAAGTGCTACCTCCGCCGCATCGTCTCCCGCGCCTTCTCCCCCGAGTCCATCCGCGCCTCCGTCCCGGCCATCGAGGCCATCGCGC	chromosome02	29852223	29853308	minus	AC	CT	3	0	0	0	3	null	null	intergenic-intergenic	null	null	null	null	null	null	null	null
Os02circ23164	HWI-ST620_0173:6:1101:13433:7549#0/2_A_GGAGCTGGTGCTGGTGGCGCCCAACGTCCTCTCCACCCGCACTCCGAAGCAGACCGAGCAAGAGGACGAGCAGTTGGTAGCCAAGACCAAGACTACGAGA	chromosome02	29882757	29883965	plus	AG	GT	3	0	0	0	3	null	Tc1/Mariner	intergenic-intergenic	null	null	null	null	null	null	null	null
Os02circ23303	HWI-ST620_0167:5:2104:8562:100438#0/2_A_GTCTGGGCCAGCATGGGCCAAAAGGAGGAAGCTGAATATAGAAAAAAAGTGTTCCAACCTTTCAAAGGGAAATCAATGGCAATGATATTTGCCAAGCCGT	chromosome02	29935431	29936630	plus	AG	GT	3	0	0	0	3	null	null	cds-cds	null	null	null	null	null	null	null	null
Os02circ24036	HWI-ST620_0167:5:1103:11863:44436#0/1_A_TCAAAAGCAGCCCCATATTGTACTGATATTCATGTAATTTTTCCCTTGCACTGACTTTTTCTTCCCTTTCAGCTATTTTTTTCTCTCTTTCTTCTAATTT	chromosome02	30241824	30243226	minus	AC	CT	3	0	0	0	3	null	null	intron-intron	null	null	null	null	null	null	null	null
Os02circ24556	HWI-ST620_0171:3:1101:17412:196082#0/1_A_TGTCATCAGCAGTGTCGTCCATGTCATAATCATCCTCCATAATAACAGCAAGCTTTCTGTCAGGACTCAATGCTGTATGATTCACTGGCCATTCAAACTG	chromosome02	30791404	30796742	minus	AC	CT	2	1	0	0	3	null	null	cds-cds	null	null	null	null	null	null	null	null
Os02circ27411	HWI-ST620_0167:5:2306:17179:83595#0/2_A_CATCTCCAAGCATATAAGCAATACGTGGTTGTGGGACCGTGTTCGAGTTAGTGGTGGTGTTGAAGATGAGCTCCTTCAGCCACAATTCAGTATAGGTTTG	chromosome02	32921104	32924132	plus	AG	GT	3	0	0	0	3	null	null	intergenic-intergenic	null	null	null	null	null	null	null	null
Os02circ27700	HWI-ST620_0177:6:2205:5726:182546#0/2_A_CTCGAACAGAACCCTCGATGCTAGTATCTGGGAGTGATGATTGCAAGTATCGAATTTGACCGTGATGATGAGCTATTTGCTACTGCTGGAGTCTCAAAGC	chromosome02	33385837	33386354	minus	AC	CT	0	0	3	0	3	null	null	cds-cds	chromosome02	33385837	-	Os02t0771100-02	chromosome02	33386354	-	Os02t0771100-02
Os02circ28124	HWI-ST620_0177:8:2201:12233:137792#0/1_A_GTTGCAGTAGGCAGTCGCGTTGAAGGAAGGGGTTGAGATGCAGTGGCCACGGAAGGTTATTAGCAGTAGACATGTCAGGGCCGTCGTTCCCGGCGGCAGC	chromosome02	33902898	33903396	plus	AG	GT	0	3	0	0	3	null	null	intergenic-intergenic	null	null	null	null	null	null	null	null
Os02circ28771	HWI-ST620_0171:4:1305:1877:13661#0/1_A_GTCAGATCGAATCGATCGGTGGGTGAAGGAGCTCGACGATGGCTTTGGGTGCAGGGCGAGAATAGCAAAAACAAAAACAAGAATCAGTGTGAAGACAATG	chromosome02	34548002	34550029	minus	AC	CT	0	3	0	0	3	null	null	5utr-cds	chromosome02	34548002	-	Os02t0792900-03	null	null	null	null
Os02circ29399	HWI-ST620_0166:7:1203:6984:155457#0/1_A_GGAGGCTCTGCTCCCGCAGCATGTCCTCCACGAATCCAACGCCCGCCATTGCTGCTGCTACCAAATCACAATCCGGCCAATGTGGGCGTCCTTGCGGTCG	chromosome02	35266541	35266905	plus	AG	GT	0	0	1	2	3	null	null	intergenic-cds	null	null	null	null	chromosome02	35266905	+	Os02t0806400-02
Os02circ30343	HWI-ST620_0166:7:1306:14400:110117#0/1_A_TCAGTGCAGAAGAATGCAAGTGCGTCTCATCCAGATGTGATGCATGGGAACTGGCACCATGGGGTAAAACCTCTTTCCTACTTCTTCATCCATTGGGAAA	chromosome02	36037950	36038250	minus	AC	CT	0	0	3	0	3	null	null	cds-cds	chromosome02	36037950	-	Os02t0819500-02	chromosome02	36038250	-	Os02t0819500-02
Os02circ30626	HWI-ST620_0171:7:1302:6571:157828#0/1_A_GCTTCGATGATAAGATGCACGCGTCCGAAGAATAAATTCGCGTGCTTTACCTGCCATCCAGCAGTACCATATCGTTTCAAGGAGGATGCTGCTCGGCAAA	chromosome02	36163833	36164764	plus	AG	GT	1	1	1	0	3	null	null	intergenic-intergenic	null	null	null	null	null	null	null	null
Os02circ31333	HWI-ST620_0166:7:1107:2393:35458#0/2_A_GTTCATGTCAAATCAAGAGACAAGTTTTGTCACTATTGGACAACGGGTACTTGCCAATCCTTTGAGGACATATACAGAATAAAGCTACCAGGTAATGCAA	chromosome02	36657036	36657524	plus	AG	GT	0	0	3	0	3	null	null	intergenic-intergenic	null	null	null	null	null	null	null	null
Os02circ05480	HWI-ST620_0171:7:1304:17573:62102#0/1_A_GTCGTCGAGCGGCACGTTGAGGTCGGCCCGCACGAACACCTTCTTCCGGCAAAGCAGCAGCCAATTTCTCAACTTCCTCACCAATGCAATCATTGGCCAT	chromosome02	3727796	3729355	plus	AG	GT	0	3	0	0	3	null	null	cds-cds	null	null	null	null	null	null	null	null
Os02circ05626	HWI-ST620_0177:6:1104:20885:84954#0/2_A_GCACACAGGAATAAATGCATCGATGCAGACAACAACCAATACAAGGCATGGCTCTGTGTACAAACTCGCTTTTGGACCCAAGGCATTTGTTGTTGTCTCC	chromosome02	3998061	4002333	plus	AG	GT	1	0	2	0	3	hAT	null	5utr-3utr OR cds-intergenic	chromosome02	3998061	+	Os02t0173100-02	null	null	null	null
Os02circ06286	HWI-ST620_0166:7:1106:19492:36582#0/2_A_GCTGATGGATGCTTTACAAAAGTCACTTCATGTGCTTGACATGCATGCGCGTGCAGTCCCATTCTGAGAGCCGTGCTGTCGCCGGAACTACTACCGAGGA	chromosome02	4511095	4512588	minus	AC	CT	0	0	3	0	3	null	null	ncRNA-ncRNA	chromosome02	4511095	-	Os02t0180800-01	null	null	null	null
Os02circ07798	HWI-ST620_0171:1:1103:13631:192128#0/1_A_CCCGACGTCGAAGCGCCGCCCGGCTCCCGCACCAGCTCCGGCACTCTCCCTATCTCCTCGTCGCTCTCCATTCCTGTCTGAGCATCTGGTTCTCATTCTG	chromosome02	5761069	5762773	minus	AC	CT	0	0	2	1	3	null	null	cds-cds	chromosome02	5761069	-	Os02t0203000-00	chromosome02	5762773	-	Os02t0203000-00
Os02circ09410	HWI-ST620_0166:6:2208:19755:46313#0/1_A_GCTCCCAATCCCCATTGATGAAGCGATATGCCGTCCCTGTCGGCCGTGCTGCTCCCCCGCGCGCGCTCGTAACCCACTCGCGGTGCTCTGGTGCTCGTGC	chromosome02	8242193	8242342	plus	AG	GT	0	0	2	1	3	Mutator || PIF/Harbinger	PIF/Harbinger	cds-cds	chromosome02	8242193	+	Os02t0245200-01	chromosome02	8242342	+	Os02t0245200-02
Os02circ01607	HWI-ST620_0167:6:2206:16772:117486#0/1_A_GGCGTCGCGGGTGACGAAGGGGTAGGTGTTGACGTTGCGGTTGAGAACGAGGCGCCCCACGGGCCGGAGCGGCACCTCGTCCTCCGGCCATGTCTTGGTG	chromosome02	826256	826656	plus	AG	GT	1	2	0	0	3	null	null	intergenic-intergenic	null	null	null	null	null	null	null	null
Os02circ02178	HWI-ST620_0171:6:1101:18649:17011#0/1_A_GCTAAAATGAGCCTTTATAATTGGTACCAACAGTGGAAGATACCCGATTCTTGGCCCCAAAGTATGGTTTGCCAGATCCAGGAGATTCAGGCTCATCAGA	chromosome02	931567	933535	minus	AC	CT	0	0	0	3	3	null	null	cds-cds	chromosome02	931567	-	Os02t0117800-01	chromosome02	933535	-	Os02t0117800-01
Os02circ10130	HWI-ST620_0171:3:1202:5904:70306#0/1_A_GTCGCTGAGGCGGTCGTGCAGGTCCCAGATCCGCTCCAGCACCTCCTCCGCCTCCGCTGCGTCCCATCTCATCTTCCCCATAATACTTGAACCGTTGCTC	chromosome02	9421056	9422659	minus	AC	CT	0	3	0	0	3	null	null	ncRNA-ncRNA	null	null	null	null	null	null	null	null
Os03circ11859	HWI-ST620_0171:5:1202:13662:125957#0/2_A_CAACATTGACCCCAACCGGACGACCGTCTTCTTCATGAGCATGTCTCCCAACCACATCACGTTCGACGCGAGGCTGCTGCTGGAGCGGCTGCGCAACAAG	chromosome03	10198144	10198884	plus	AG	GT	0	0	0	3	3	null	null	cds-cds	chromosome03	10198144	+	Os03t0291800-01	chromosome03	10198884	+	Os03t0291800-01
Os03circ12067	HWI-ST620_0166:7:2105:16076:21128#0/2_A_GGATGCAGGAAGGTGGTCAGACTGCTGATTTCTTCCGTGGAGACAACAAAGAAGGGGTGGAGGCACGCAATGAGGTGGCGGCTCTAGCAATGGAGGATAT	chromosome03	10312219	10312601	plus	AG	GT	0	0	3	0	3	null	null	cds-cds	chromosome03	10312219	+	Os03t0294200-01	chromosome03	10312601	+	Os03t0294200-01
Os03circ12514	HWI-ST620_0167:5:1305:19296:139899#0/2_A_CGCATGAAGAAACGTGGTGGCCGCAACGTGGAGGGGAAGCTTCCTCTGGAGCGATCAAATCGCCGGAGGATGAGGAGGAAGAGTGCGACGAGGATCTGTC	chromosome03	10699815	10700212	plus	AG	GT	3	0	0	0	3	null	null	cds-cds	null	null	null	null	null	null	null	null
Os03circ12727	HWI-ST620_0167:5:2103:1674:156271#0/2_A_CGTTGGCTAGATCCATACGAGAATGTTGTGTGCATAGAGTGCAATCAAGGTGGGTTCAGTCAAGGCAAGGAACGCTGCGTCTATAAGACGGAGGCAGAAA	chromosome03	10700442	10702064	plus	AG	GT	3	0	0	0	3	null	null	cds-cds	null	null	null	null	null	null	null	null
Os03circ14833	HWI-ST620_0166:6:2204:8188:55623#0/2_A_CGATCTCGATCAAGGTCTGTTTCTTCCCGTTCACGGTCAGCATCAAAAGGGCGCTCTCCATCAAGTAAATCTCCTAGAACTCGCCGTTCAGCATCCCGAT	chromosome03	12865532	12865633	plus	AG	GT	0	0	3	0	3	null	null	cds-cds	chromosome03	12865532	+	Os03t0344100-01	chromosome03	12865633	+	Os03t0344100-01
Os03circ15245	HWI-ST620_0177:7:1204:21363:69987#0/1_A_GGAGTTCGAGAATGAATTGGAACCACATATTAGGCACAGCAATGCTTACAATAGGAAAGTGATGTTTTCAACAAATTCAAACACAGAGATGGAAGCTTTA	chromosome03	13114754	13115723	minus	AC	CT	0	0	3	0	3	null	null	5utr-cds	chromosome03	13114754	-	Os03t0348200-00	chromosome03	13115723	-	Os03t0348200-00
Os03circ15617	HWI-ST620_0167:7:2102:9555:18290#0/2_A_CCCGATTTATGACATGGGCACGACAGATTGCATGGTTCATTGTCAAGAGGAATAGTCGTTGGATCTTCCTGAAGGCGGTGAAGTGGAGGATGAAGATAGT	chromosome03	13295139	13295479	plus	AG	GT	3	0	0	0	3	null	null	cds-3utr	null	null	null	null	null	null	null	null
Os03circ01405	HWI-ST620_0171:3:1302:3160:127811#0/1_A_TCCCCATGTCACTTTGCCCTGTGAGCTCACTGACCTCGCCGAGTTGTACACGTTGTCAGGAGCAACCTCACCACAAGCATTAACAAAACCAACAACAATC	chromosome03	1409859	1410361	plus	AG	GT	2	1	0	0	3	null	null	cds-cds	null	null	null	null	null	null	null	null
Os03circ01534	HWI-ST620_0171:3:2301:8760:36675#0/1_A_GCAGACCCTTAATGCCAAGACCCTGCTTTCCAGATGTGGCTTTGTCCTGAACAAGATTGTATAGGTTTTCTTGGTCTTCTTCTTTAAGAACAATAGAGCT	chromosome03	1446170	1446960	plus	AG	GT	2	1	0	0	3	null	null	cds-cds	null	null	null	null	chromosome03	1446960	+	Os03t0125300-01
Os03circ18825	HWI-ST620_0166:7:2305:8239:122819#0/1_A_GTGGTACTTCCAGGTGCTCGTGCTCATCGCCGGCCTACTCCCGAACCCTGAACTTGCATTGGATGCCCTATCTGTGTGCTCGGAATGGGTAGCGCCGTGG	chromosome03	21682049	21682680	minus	AC	CT	0	0	2	1	3	Tc1/Mariner	hAT	cds-cds	chromosome03	21682049	-	Os03t0572900-01	chromosome03	21682680	-	Os03t0572900-01
Os03circ19405	HWI-ST620_0173:6:2108:7341:43808#0/2_A_TCCGAGGGGGGGCTCGACTACCTGGGGAACCCCAACCGCCGCCGCATCGCCCTCGTTAGAACGATGGCCGAGTCGGCGCTGCACCAGACCACCAGCTTCC	chromosome03	22811042	22811601	minus	AC	CT	3	0	0	0	3	null	null	cds-intergenic	null	null	null	null	null	null	null	null
Os03circ19792	HWI-ST620_0171:4:1302:12849:121582#0/1_A_CTCTGCTGTATCCTTGACATCGGCATTTCCTGCCTCGGCCTCAGCCTCAGCCATCTTGACATCTTCACTGACCTCCTCTTCTTCTGCTTCATCTTTGTTT	chromosome03	23036591	23037004	minus	AC	CT	1	2	0	0	3	null	null	cds-cds	null	null	null	null	null	null	null	null
Os03circ21460	HWI-ST620_0166:8:1207:4415:165626#0/1_A_GCTTTGGAGGAGCTGAAAGAACTTCTGCTTCTTCCAATTCTGGGGAGTTATTTTGTTGATGATATCAACATGCTTGTCCCATCCACTGGCAACAGCCACT	chromosome03	26439643	26439910	plus	AG	GT	0	0	3	0	3	Tc1/Mariner	null	cds-cds	chromosome03	26439643	+	Os03t0656900-01	chromosome03	26439910	+	Os03t0656900-01
Os03circ21905	HWI-ST620_0171:4:2201:6650:132443#0/1_A_CGGGGAGGAGCGCGGCGGCGAGGGAGGCGTCCCCGGACTCGAGGACCTCGTTCCCGACTGCCACGACGGAGATGGTCGGTGTGGTACAGCCCGAACGAGC	chromosome03	27220243	27220924	plus	AG	GT	0	2	0	1	3	null	null	intergenic-intergenic	null	null	null	null	null	null	null	null
Os03circ21974	HWI-ST620_0167:6:2101:11058:169362#0/2_A_CATCAACGACAGGGAGACGGGGAGGTCACGTGGGTTTGGCTTCGTCACCTTTTCCTCCTCGGTTCGGTTCCGTGGTTCGTCTAGGGTTTAGTGGGTTGAG	chromosome03	27271079	27271541	minus	AC	CT	3	0	0	0	3	Tc1/Mariner	null	intergenic-intergenic	null	null	null	null	null	null	null	null
Os03circ22681	HWI-ST620_0171:7:1203:13846:35578#0/1_A_GCCTTGCCAACTGGAGACATTTGTTGTAGTGGATCCGTTTATACCTGACTAAACTTTATTTCATGAAATTCAATCAACTTCCGAGCTCTTGTCCTTTTTT	chromosome03	27918691	27919905	plus	AG	GT	0	3	0	0	3	null	null	intergenic-intergenic	null	null	null	null	null	null	null	null
Os03circ23587	HWI-ST620_0171:2:1307:4787:70957#0/1_A_TTCAACCTCTCAATCGCCACACGATTAAACCGTTTAAGGTCTCCCTCAATCATGTACTTGGTAACCTTAATTTAGCATCAGTTCATGTAAGACAGGTGAC	chromosome03	29113362	29114140	plus	AG	GT	0	2	0	1	3	null	Mutator	cds-3utr	null	null	null	null	null	null	null	null
Os03circ03572	HWI-ST620_0166:6:1304:5533:171238#0/1_A_GTCCTTTGATCTCGTTCTGGATCTGCTTCAGGCTCTCCAGCCTCTTCTTTCCTACGTCTTGACCAGCTATATACATATGGAAACAGTGTTGATGTAGTGG	chromosome03	2924442	2928326	minus	AC	CT	0	0	2	1	3	null	null	intergenic-intergenic	null	null	null	null	null	null	null	null
Os03circ25235	HWI-ST620_0166:6:2201:18374:125199#0/1_A_GAGCGGTAGCGTGGGTGATCATTGAGCCACTTCTTGATCTTAAGAGCATCTCTAGTCGTATTGTCATTCATCCAGCAGTATGATAGGTAGTAACCATATG	chromosome03	30683420	30685463	plus	AG	GT	0	0	1	2	3	self-complementation	self-complementation	cds-cds	chromosome03	30683420	+	Os03t0730500-02	chromosome03	30685463	+	Os03t0730500-02
Os03circ26167	HWI-ST620_0177:7:1108:21157:107196#0/2_A_GACACAGAAGATTACATTAATATCCAGCTTGACAACCACCGTAATCAGTTAATTCAGGTGAGAGATGAACTTGAACAATTATTGGACGATGACGATGACA	chromosome03	31265510	31266166	minus	AC	CT	0	0	3	0	3	null	null	cds-cds	chromosome03	31265510	-	Os03t0742400-01	chromosome03	31266166	-	Os03t0742400-01
Os03circ26338	HWI-ST620_0171:4:1207:18435:156448#0/1_A_GCTTGTGTTTTTTCTCTCCCTCGCTTGTAATAATTATTTTTTTTCCTTTTTCTCTCCCTTTTGTTTCCTCCTTTTCAGAGCTGGAAGAACGGAATTCTTC	chromosome03	31391035	31393316	minus	AC	CT	0	3	0	0	3	null	Tc1/Mariner	intergenic-intergenic	null	null	null	null	null	null	null	null
Os03circ04007	HWI-ST620_0166:7:1201:20031:154571#0/1_A_CCTGCGAAATAGTTTTTCTACTATTCTTTCACTCGCACGGTGAAAAATTTACTGCTGCAAACCTACAGTGCCCCTGAGCACGTACAGCCACGCGAGGGTT	chromosome03	3237393	3239592	minus	AC	CT	0	0	2	1	3	null	null	intergenic-intergenic	null	null	null	null	null	null	null	null
Os03circ27386	HWI-ST620_0166:7:2202:19677:159184#0/2_A_CCGCGGCAGCGACGCCGATTCCGAGTGATCGAGCTGATGAAGGAGGAGGCCGGGAAGAGGAGGAAGGACGGCGACGACGCGGAGGCGAAGGCGGAGGACG	chromosome03	32542873	32543018	plus	AG	GT	0	0	3	0	3	null	null	cds-cds	chromosome03	32542873	+	Os03t0764600-01	chromosome03	32543018	+	Os03t0764600-01
Os03circ29382	HWI-ST620_0167:7:1106:12716:162586#0/1_A_CACCTGTGAGTTCACGTAACTGCTGTTGAAGTTTTGCAAATATTTCTTCTCTCTTCTGAGCAAACCAAAACTAACACGTGGTCCTCCACGTGGGTCTTCC	chromosome03	33851449	33851591	plus	AG	GT	1	0	2	0	3	null	null	cds-cds	null	null	null	null	null	null	null	null
Os03circ29686	HWI-ST620_0167:7:2302:9811:51280#0/2_A_CGTCCAGATCAAGAAGCTCGTCGCCGCCGGCAAGCTGACCAAGGCCAAGAAGGCCGCCGCGCCGAGGAAGGCACGCTCCACCGCCACCCACCCGCCGTAC	chromosome03	34203233	34203540	plus	AG	GT	1	2	0	0	3	null	null	cds-cds	null	null	null	null	null	null	null	null
Os03circ30228	HWI-ST620_0177:8:2304:8274:42206#0/1_A_TTTCAGAACCATCCCCCGGACTACAGAAGAGTTGTGCAAACCACCTTCTTCCAAGTCAATACCAACTTTCGTATTCCCACCAGCATGTTCAGCATAAAGG	chromosome03	34492754	34495805	plus	AG	GT	0	3	0	0	3	null	null	cds-cds	null	null	null	null	null	null	null	null
Os03circ31561	HWI-ST620_0167:7:2101:5447:133677#0/1_A_TCGCTCGCAGCGTCTCATACACCTCCTTGACGAACCTCTGGGAGTTTCTCTGGACAATCAGTTCTGGGTGTTTTCCGGATTTTGAAGTAGTTCTCAAAGG	chromosome03	35623899	35625107	plus	AG	GT	2	0	0	1	3	null	null	cds-cds	null	null	null	null	null	null	null	null
Os03circ31678	HWI-ST620_0177:7:2304:1527:71581#0/1_A_CAGTGCTAATGATACCTCGTCTGCATCCCTTTTCGTCTTGGTGAACACAATGGGTTTCCCACCCTTTGCATACACCTTTGTCACTTTGGTTATGGTGTTT	chromosome03	35667422	35669290	plus	AG	GT	0	0	3	0	3	null	null	cds-cds	chromosome03	35667422	+	Os03t0827700-01	chromosome03	35669290	+	Os03t0827700-01
Os03circ32235	HWI-ST620_0167:5:2305:3825:88531#0/1_A_GGTTGAAGTGGTGCACGCGCGGTGCCACGGGCCTGGTCACCTCGAAGTAGGCGTTCTTGTTCCCGGATCTCCCCGACCGGAACACCACCCACTTCCCGTC	chromosome03	36231674	36232216	minus	AC	CT	3	0	0	0	3	null	null	intergenic-intergenic	null	null	null	null	null	null	null	null
Os03circ32442	HWI-ST620_0166:6:1105:1474:40435#0/1_A_CCCGTCGCCGCCGTCAGCCGCCGCCGCCGCCGCCGCCGAGTGTAGTCGAAGATGAGATGGAACGGCTCCGGCGGCTCCCACGTGAAGAAATCGTCGGCGA	chromosome03	36366838	36366959	plus	AG	GT	0	0	3	0	3	null	null	cds-cds	chromosome03	36366838	+	Os03t0843800-00	chromosome03	36366959	+	Os03t0843800-00
Os03circ04630	HWI-ST620_0167:4:1206:2469:111811#0/2_A_GCATTAGAAGCGGGCAGCAGTAGATAGAGCCATCTATCTGTACAGAGCAGCAGCAGCAGAGAGAAGGAGAAGAAAAAAAATGGAGGAATAAAAAGGGCAA	chromosome03	3832973	3833229	plus	AG	GT	3	0	0	0	3	null	null	intergenic-5utr	null	null	null	null	chromosome03	3833229	+	Os03t0171600-01
Os03circ05119	HWI-ST620_0166:7:1303:19058:102748#0/2_A_CATCAATTCACCCATGGATGTTGTCAGTATTGAATCAACTACATCATACAGTGAACAGGGACACAATGATTAGATATAAACGGCTCCTTTGCTCGGTCGA	chromosome03	4329246	4333741	plus	AG	GT	0	0	2	1	3	null	Mutator	cds-cds	chromosome03	4329246	+	Os03t0182400-01	chromosome03	4333741	+	Os03t0182400-01
Os03circ06504	HWI-ST620_0171:4:2205:5887:135893#0/1_A_GCTTCTTCTTGTAATTATCTTCTTCCTCATACCTTCCTCCACCTCCATATCCACCCGCACCGGCACTCGGCTTCTTCATGTAATCATCTTCTTCTTCCTC	chromosome03	5823477	5823743	minus	AC	CT	1	2	0	0	3	null	null	cds-cds	null	null	null	null	null	null	null	null
Os03circ06532	HWI-ST620_0173:6:2203:11284:57556#0/1_A_GGCTTCTTCTTGTAATCTTCTTCTTCTTCTTCTTCGTACCTCCCACCTTGGCCTCCACCACTTGAAGCACCATACCCATATCCACCACTAGGCTTCTTGT	chromosome03	5823342	5823818	minus	AC	CT	3	0	0	0	3	null	null	cds-cds	null	null	null	null	null	null	null	null
Os03circ06716	HWI-ST620_0166:8:1208:4886:41012#0/1_A_CGGCACTGTCTTTATTCAGAAACTGGAGTTGTTTGCAGCAATCTTTCAATTTCTGTGCCCATATCCAATGCCATACCCTTCAGCTCTCCCAACATGTTAC	chromosome03	5910049	5911343	plus	AG	GT	0	0	2	1	3	null	null	5utr-cds	chromosome03	5910049	+	Os03t0212400-01	chromosome03	5911343	+	Os03t0212400-01
Os03circ06892	HWI-ST620_0171:2:2104:2993:86886#0/1_A_GTCATCAAGGTGTTGCTGATCAACTGAGTACGGGACTTTTCCACACAGGGGAAATGCTGCAGATCCTGGTACAACTCAGAAGCAGAAAATGGTTGAAGCA	chromosome03	5970123	5971721	plus	AG	GT	1	1	0	1	3	null	Tc1/Mariner	intergenic-intergenic	null	null	null	null	null	null	null	null
Os03circ07040	HWI-ST620_0177:8:2104:9101:35763#0/1_A_TGAGCAACCATGTCTGCTGCTTCATTGCTCAGATGGTCCATGTAGGCCTGGTGATGGTGAGCATGAGGGTGATGATACAGACATACAGTACGTGCATCAA	chromosome03	6100978	6101300	minus	AC	CT	0	3	0	0	3	null	null	cds-3utr	null	null	null	null	chromosome03	6101300	-	Os03t0215400-02
Os03circ07053	HWI-ST620_0177:8:2208:5405:138600#0/1_A_TGTGGTTTGAAGAAATTCAACTCTTGTTTTCAGCTTCAGGTATTCTTGGTAATTAATTTCGTTTTCTGTAACTTTTTCCTCAAGTCTTTGTTGAGATCTT	chromosome03	6102052	6103498	minus	AC	CT	0	3	0	0	3	null	null	cds-cds	chromosome03	6102052	-	Os03t0215400-02	null	null	null	null
Os03circ07284	HWI-ST620_0167:7:1303:12580:177032#0/2_A_GGAATTGCAAGGGATGCATTCAACACGTTCTTCTCGATCCCAATTCTTGCTCGTCTGCATCTCTTGCTGTCTTTTCCTACTTAATTTTGTGAAATTCTGA	chromosome03	6326805	6327279	minus	AC	CT	1	1	1	0	3	Mutator	null	intron-cds	null	null	null	null	null	null	null	null
Os03circ07463	HWI-ST620_0167:4:2203:8149:170030#0/2_A_TGCGTGAATTTAAGGAGTGGATGGATGAAAACATGGAGTATAAAGAACCTATGGTTGGAAGGCAACCCAATCTGCTGTGCTCGTTGGTATCGAGCACGTG	chromosome03	6432892	6434248	plus	AG	GT	2	1	0	0	3	null	null	intergenic-intergenic	null	null	null	null	null	null	null	null
Os03circ07813	HWI-ST620_0166:7:1105:16310:152803#0/2_A_GTTTTGGTTCTGTTTAAAGAAGTGCACGCACAAACTGAGGTAAATGGCTGTAATTTGGGTCGTGTAAACAGCATGGCGGCTACATGTTATACCAAAAGGA	chromosome03	6804486	6804821	plus	AG	GT	0	0	3	0	3	null	null	3utr-intergenic	null	null	null	null	null	null	null	null
Os03circ08208	HWI-ST620_0167:5:1107:5173:30659#0/2_A_GTAAAATTTTGCATTCACCATATAGAAATAGTAACTGACTATCCTTGTTTAGTTCGAATTACATTTCTATATATTGTTGTGCTCCCAGACGATGGTTGCA	chromosome03	7529001	7529382	plus	AG	GT	3	0	0	0	3	null	null	5utr-5utr OR 3utr-3utr	null	null	null	null	null	null	null	null
Os03circ08919	HWI-ST620_0177:8:1203:6086:76799#0/1_A_GCTCATTGGAGTTGATCCTTGGCTCAATGTCCGTGCAACATTTTTATGAAAATCATCTTGAACCATCTGCACTATATGCCATTGTTGTGCACCAATGTCC	chromosome03	8218846	8220073	minus	AC	CT	0	2	0	1	3	null	null	cds-cds	chromosome03	8218846	-	Os03t0254700-01	null	null	null	null
Os03circ09011	HWI-ST620_0171:6:2303:12177:96032#0/2_A_CCATCATCATGTGTACCGGAACAGATCATCAAGGGAACCAAAGAAAGTCACCTTTACAGGCTGAAGCAAGTGTTTCACAATAAACAATAATGCTGCAAAC	chromosome03	8243804	8247126	plus	AG	GT	0	0	1	2	3	null	null	intergenic-intergenic	null	null	null	null	null	null	null	null
Os03circ09727	HWI-ST620_0173:6:2308:6265:46545#0/2_A_TGCCGCTGTACATCGGGAGCGTGGAGGAAGTGCAGATCCCAAAGGCAGGCAAGATCTATGCCTTCAACGAGGGCAACTACGCGCTCTGGGACGACAAGCT	chromosome03	8889459	8889944	minus	AC	CT	3	0	0	0	3	PIF/Harbinger || hAT	null	cds-cds OR 3utr-3utr	null	null	null	null	null	null	null	null
Os03circ09974	HWI-ST620_0171:8:2304:17287:47321#0/1_A_CCGCTCTTCACGTCTGCGCCGTCTTTCCTCTTTTCGCAACCTCTTCTCTTCCTTTCTTCCTAGCATCAGCATCTGAGTCAGATTCACGATCCTTCTCAAG	chromosome03	9077896	9078070	minus	AC	CT	2	1	0	0	3	null	null	cds-cds	null	null	null	null	null	null	null	null
Os03circ10585	HWI-ST620_0173:6:1104:16306:90054#0/1_A_GTAGAAGATTGGTGAAGCAGGGCAAGCAAGGTGATAGATTTGGTCAACCTCTGGGTTGATCAACTCCTTCACATTCTCAGCAAGTTCCAGCATGGTGAAT	chromosome03	9486789	9488127	plus	AG	GT	2	1	0	0	3	null	null	cds-cds	null	null	null	null	null	null	null	null
Os04circ04221	HWI-ST620_0167:5:2104:2962:166124#0/2_A_CAGCTCTTGCTAGAGGTGAACTGCAGGCAGGATCAAATTGAGCGTGTAACTCAAATTTTGGGAAGGCGGACAAAGAACAACCCTTGCCTAATTGGAGAAC	chromosome04	19827587	19828387	minus	AC	CT	3	0	0	0	3	null	null	intergenic-intergenic	null	null	null	null	null	null	null	null
Os04circ04869	HWI-ST620_0166:7:1204:9409:167371#0/1_A_GAATTTCTTGACAAACTTCACACATTCAGCATGGCCTAACGCTGTTAAACCGCGCAACAGCACCAGACTTTCTCTATCCAGTTTCATCATACAAAGAACC	chromosome04	20476938	20478387	plus	AG	GT	0	0	2	1	3	null	null	cds-3utr	chromosome04	20476938	+	Os04t0409600-01	null	null	null	null
Os04circ05861	HWI-ST620_0171:5:2106:6133:183677#0/2_A_TGTTGAGGTTCCGGGACCGTGAATCATATGCACAGAATAAGACAAAGGAGTATGACGCAATTGCAATGAAATTTGAATGTTGATCCATCTTCAAACAACT	chromosome04	22213465	22215074	minus	AC	CT	0	0	0	3	3	null	Tc1/Mariner	cds-cds	null	null	null	null	chromosome04	22215074	-	Os04t0441900-02
Os04circ07856	HWI-ST620_0171:5:1304:7967:19020#0/1_A_CGTCGATGTCGTCCTCCTCGCCGACCTTCCGGGCCTCGCGGCGGGCGCGCTTCTCCTCCCACTTGGAATTATCTAAATCAAAAACATGTAAGTCATTGTA	chromosome04	24683923	24686300	minus	AC	CT	0	2	0	1	3	null	null	cds-cds OR intergenic-5utr	chromosome04	24683923	-	Os04t0483600-02	null	null	null	null
Os04circ08244	HWI-ST620_0167:5:2302:3527:165473#0/2_A_GTTGAGCTTCAGGGGCAAGCGGGTTCTAGAGCTACCATCACCAGCTGTCGAGATAATCCCATCAAAGAGTGCTCATCCTTACAAATATGCTGGCGAGAAG	chromosome04	25112195	25112834	plus	AG	GT	3	0	0	0	3	null	null	cds-cds	null	null	null	null	chromosome04	25112834	+	Os04t0492400-02
Os04circ08696	HWI-ST620_0167:5:1304:3695:182503#0/1_A_GGTCGTTTGCTCTTCGAGATTGCTCTGCGATGTGAGGATTGGGTTGTACTGCGAGATCATCCCGCAGGCCGCGACGCGGCCGCGCACCCGCATGTTGAGC	chromosome04	25357703	25358808	plus	AG	GT	3	0	0	0	3	null	PIF/Harbinger || hAT	ncRNA-intergenic	null	null	null	null	null	null	null	null
Os04circ10597	HWI-ST620_0173:6:2102:18359:62806#0/1_A_GGTCGGGGTGGCCGCGTCGGCGACGGCCGCCCAGTCGGCGGAGGTCAGGTGCCGGAGTGCCATCTCCATGCGCATCTGCTGCGTCTTCCTCGCCGCCTCC	chromosome04	27709692	27710114	minus	AC	CT	2	1	0	0	3	null	PIF/Harbinger	intergenic-intergenic	null	null	null	null	null	null	null	null
Os04circ10832	HWI-ST620_0173:6:1208:7189:88058#0/2_A_CAAAGTTATTCAGGAGAAAAAGGTGCTTGAGGTTCTCACTGATCCTGAGAAGAGAGACATATATGACCAATATGGGGAGGATGCTCTTAAGGATGGAATG	chromosome04	28005846	28008037	plus	AG	GT	3	0	0	0	3	null	null	cds-cds	null	null	null	null	null	null	null	null
Os04circ10939	HWI-ST620_0166:7:2202:14512:106918#0/2_A_CAAAAGTGGATCTCCTAATTCCAGCCCTGGTTCAGGGCACAACAATGTACAAAAGGCTCGATTTTACTGTACTCAAATACAAAAACCAAAAGCTCTCAGA	chromosome04	28056739	28057068	minus	AC	CT	0	0	3	0	3	Tc1/Mariner	null	cds-cds	chromosome04	28056739	-	Os04t0550400-01	chromosome04	28057068	-	Os04t0550400-01
Os04circ11712	HWI-ST620_0173:6:2307:9839:11236#0/1_A_GGAGGTGGATGGCAATGGCCAGGCCGGCGCACACGGTGAGGGGCAGGTTGATGCTCGCGGCGTCCTTGGGCCGCGCGCTGCCGCGCAGCACCCCGCACCC	chromosome04	29272521	29273213	minus	AC	CT	3	0	0	0	3	null	null	intergenic-intergenic	null	null	null	null	null	null	null	null
Os04circ11744	HWI-ST620_0166:6:2202:9639:118866#0/2_A_GAAATTTCATCCCAGAGGGTATGACAAGATTGGTGTGGGAATAAGAGAAATCAAGGATTTTTGGAATTTAAGAATGTTAAGGTGCAATGTCAAGAGGATA	chromosome04	29343270	29344982	plus	AG	GT	0	0	3	0	3	null	null	cds-cds	chromosome04	29343270	+	Os04t0572600-01	chromosome04	29344982	+	Os04t0572600-01
Os04circ11872	HWI-ST620_0166:8:2106:10526:197908#0/2_A_GTGGAGGAGGAAATGACAACAGCTCTGGCTGTTCATCAGCCTTCAAGTCAGAGAAGTCAGAGTGCCCCACTTGTTGGCGATGGGAAGATGCAAATGGATG	chromosome04	29565610	29565798	plus	AG	GT	0	0	2	1	3	null	Tc1/Mariner	cds-cds	chromosome04	29565610	+	Os04t0576700-01	chromosome04	29565798	+	Os04t0576700-01
Os04circ13232	HWI-ST620_0167:4:1105:3947:88843#0/2_A_GGCAAGATGAATATGATGCTTCGTCCAAGCAGCTGAGTCAGATCATGGATTGACAGAGTCTGATGAGGAGTTTCACATGTGTCAAATCTGTAACACAGAG	chromosome04	31394268	31399079	minus	AC	CT	1	0	0	2	3	null	null	cds-cds	chromosome04	31394268	-	Os04t0609700-01	chromosome04	31399079	-	Os04t0609700-01
Os04circ14643	HWI-ST620_0177:8:2301:12689:150528#0/1_A_GCAAGAACAGAACCCTCTCCCTTTCACTCCGTGTTCTTGGTCTCCTCCTTGTCCTTGATGAGAAAAAATGTCGGCATGGCCTTCACTCCAAGCTTGGACG	chromosome04	32518983	32520116	minus	AC	CT	2	1	0	0	3	null	null	5utr-cds	null	null	null	null	null	null	null	null
Os04circ15881	HWI-ST620_0171:7:1305:17672:106985#0/1_A_GTGGTGGTGGTGGGACGGGAGGAGGACGCGGTGGTGGGTGGTGGACAACAGCCAGGCGCCCAAGCTTCTCTGCGAGCACGACATAAGGTGCAAGCTCTGA	chromosome04	33666328	33668245	minus	AC	CT	2	1	0	0	3	Tc1/Mariner	null	intergenic-intergenic	null	null	null	null	null	null	null	null
Os04circ17460	HWI-ST620_0167:7:1101:20322:153510#0/1_A_TGCTCGCCGCGTCTGGCTGCGGGGAGGAGAAGCGCTCTACTTTATATCTCATTTTTTCACCACTAATAAATTCCTTAATTGCAGTAACCTTTATATACAT	chromosome04	34990684	34991142	plus	AG	GT	3	0	0	0	3	null	null	cds-3utr	null	null	null	null	null	null	null	null
Os04circ01041	HWI-ST620_0177:8:1203:8704:183114#0/1_A_GGTAGGAGTAGGAGAGGGGGCGGGAGAGGAGGTGGAGTAGGGAGCTTCTTAGGATTAACTTTGGTTGGATCGAGCGAGACCAGCAACTCCTCTGCCCTAT	chromosome04	5101065	5102111	plus	AG	GT	1	2	0	0	3	null	Mutator	intergenic-intergenic	null	null	null	null	null	null	null	null
Os04circ01289	HWI-ST620_0177:7:1106:13237:61668#0/2_A_GGACACCACGAGGTTGGGCCCTACCGGCAGTGCACCTACACTCAGGGCGTCTTGAACGGCAGTCGATTGACATGTACAGTAGCGTGCAATCCCCGAACCT	chromosome04	6913618	6913970	minus	AC	CT	0	0	3	0	3	Tc1/Mariner || PIF/Harbinger	null	cds-cds	chromosome04	6913618	-	Os04t0201800-00	chromosome04	6913970	-	Os04t0201800-00
Os05circ01233	HWI-ST620_0171:6:1206:4657:147965#0/2_A_GGCTGATGATCAAGCTCATGCAGGATTCCATCCTTGATGACATCTGATAATGTGGTGTCGAATTGAGTGAGATTGAGAAAAGCGCAACAGGTCTCAGACA	chromosome05	1185181	1187508	minus	AC	CT	1	0	1	1	3	null	null	cds-3utr-acrossGene	chromosome05	1185181	-	Os05t0121700-02	chromosome05	1187508	-	Os05t0121700-02
Os05circ06818	HWI-ST620_0177:8:2307:11087:18314#0/1_A_CGGGGAATGGCTGGACAGAGTGCGTAAATACGGTCAGGACATCGAAGTGAAGAGTCTTCTTGGAATCACTCCATAAATGTGATGTTGAAATGTTACCAAT	chromosome05	13559687	13560341	plus	AG	GT	0	3	0	0	3	null	null	cds-cds	null	null	null	null	chromosome05	13560341	+	Os05t0301500-01
Os05circ07258	HWI-ST620_0171:7:2101:12964:117489#0/1_A_GCGTGTTGCTGTTGGTGTTGCTTGCTTCTCTTCTCTTCTTTCCCCTACCTCAGTCCTCAGCAGCTCCGCCTGCCTGGGGGCCAGCAGCGACGAGGATCAG	chromosome05	14190406	14190754	plus	AG	GT	0	3	0	0	3	PIF/Harbinger	null	5utr-5utr	null	null	null	null	chromosome05	14190754	+	Os05t0310500-01
Os05circ08369	HWI-ST620_0177:6:2204:9320:26916#0/1_A_TCTGAGTTTGACTCAACTAGAAAAGGTGACCAATAGAACTCGATAGTAGCATTGTACTCTGCATATGCACAGGTGAGACACTCATGAAGAAGACTGTACT	chromosome05	16811949	16812680	minus	AC	CT	0	1	1	1	3	null	null	cds-cds	chromosome05	16811949	-	Os05t0354400-01	chromosome05	16812680	-	Os05t0354400-01
Os05circ12552	HWI-ST620_0171:7:2206:12133:46776#0/2_A_CTGAAAGAACTGTAGAGGATCAAGTGGTACCTGAGGAGACAACGGAAGGTTATGCCTTCTCCTGAGGTGGAGACAACTGATCACATGCAGGATTCCTACT	chromosome05	22863545	22864689	plus	AG	GT	1	2	0	0	3	null	null	intergenic-cds	null	null	null	null	null	null	null	null
Os05circ12951	HWI-ST620_0166:6:2206:9776:168185#0/1_A_CGAACCAACTTCCTCTGCTGCTTGCAGATCAACATATAGTATATTTGTATTTGCTGGATAGTTAGCCTGCAACACAGCTTTTTTCAAATTTAGCACCATT	chromosome05	23097371	23097496	plus	AG	GT	0	0	3	0	3	null	null	cds-cds OR intron-intron	chromosome05	23097371	+	Os05t0468550-01	null	null	null	null
Os05circ13839	HWI-ST620_0173:6:2205:14782:98163#0/1_A_CCAGCACCGGCCCCGCTGGCCCCGGCGCCGCCGCCGGCGCCGACTGCGCCTCCGCCGTCGTCGCCGGAGCGGCCGGCGGCGGCGGCGTTGGTGGACGGCG	chromosome05	24142913	24144662	plus	AG	GT	1	2	0	0	3	Mutator	PIF/Harbinger	intergenic-intergenic	null	null	null	null	null	null	null	null
Os05circ15131	HWI-ST620_0171:4:1305:1644:118506#0/1_A_TCCTGCTATATCGGCGGTCATCCCTTCTCAATATCTTGAAGCTTCACTTTATTCATAAAGGTTTCAGCTAGGGTACTCTGGTTTGGTGTTCCTCCAAGCC	chromosome05	24875489	24877200	minus	AC	CT	1	2	0	0	3	null	null	cds-cds OR intergenic-intron	null	null	null	null	null	null	null	null
Os05circ16984	HWI-ST620_0173:6:1204:19377:156285#0/2_A_CATACACAGAGCTGTTCGTGTATATTTGGATCAATTAATCACCACGAATATGAATGAATGCAGCTAGTTCATCACCCTCGAGAAGTTTGCCTATCACATT	chromosome05	27144449	27145280	plus	AG	GT	2	1	0	0	3	null	Tc1/Mariner	cds-3utr	chromosome05	27144449	+	Os05t0545000-01	null	null	null	null
Os05circ17962	HWI-ST620_0173:6:1305:13414:98658#0/1_A_GGCGAGATCGAGGTCGGTGGAGAGGAGGGGGGGAGATGAGGGTTGGTATCCATCAGCCTCCGTTATGAGCTTTTTCACATTTTCCATTGCCAGTTGTTTG	chromosome05	27765833	27769591	plus	AG	GT	2	1	0	0	3	null	null	intergenic-intergenic	null	null	null	null	null	null	null	null
Os05circ18811	HWI-ST620_0177:8:1303:3603:32950#0/1_A_TTGAAAGATGGGAAAGAGTGTGCGCCTGGTTGTTCTTGAATTGCGGCACATTCATATTGTACTTCATAGCTCCTGGTACAGCAGCAGCAGCAGACTGATG	chromosome05	28341413	28342506	minus	AC	CT	1	2	0	0	3	null	Tc1/Mariner || PIF/Harbinger	intergenic-intergenic	null	null	null	null	null	null	null	null
Os05circ20581	HWI-ST620_0171:5:1202:10251:161840#0/2_A_CAAGGAGTTAAAATATCAGCACAGTGTACCGTGCTGGAAGTCAAGGTTGTTGAAGGTCATGGTACTACAGTTGATGTTGTGTTGGTCAACGGTATACTCC	chromosome05	29646528	29647432	minus	AC	CT	0	0	1	2	3	null	null	cds-cds	chromosome05	29646528	-	Os05t0592600-01	chromosome05	29647432	-	Os05t0592600-01
Os05circ03563	HWI-ST620_0166:8:2107:7662:31539#0/1_A_TGTACTAGAGGAGCAATTATGTTTGCATTGATCACAGCTTAATCTGATCATGTGTTCCACCAGAAGTGGCATTTGAGATTGCCCACGCAGCCTCTTTCTT	chromosome05	3252507	3252634	minus	AC	CT	0	0	3	0	3	null	null	cds-cds	chromosome05	3252507	-	Os05t0155601-00	chromosome05	3252634	-	Os05t0155601-00
Os05circ03664	HWI-ST620_0166:6:2308:3223:42687#0/2_A_GCCAGAAGAAAGAGGTCTCGACAAAGAAGAGGAGGACTATTTCAACAAGGGCAGTTAATGGAGAGTGGTGAAACAACACAAAGTATTAGTCTAGTTGACA	chromosome05	3333055	3333164	plus	AG	GT	0	0	3	0	3	null	null	3utr-3utr	chromosome05	3333055	+	Os05t0156800-01	chromosome05	3333164	+	Os05t0156800-01
Os05circ03973	HWI-ST620_0166:7:1101:8565:119987#0/2_A_GGTATATGCTAATGAAAATGGCTGAAGGGAACTGTAAGATTGGATGCATGGGGGAGGACAGGTCGGTATATTTGATGCGACAAACAGCACAAGAAAACGA	chromosome05	3767964	3768135	plus	AG	GT	2	0	1	0	3	null	null	cds-cds	null	null	null	null	chromosome05	3768135	+	Os05t0164100-03
Os05circ00461	HWI-ST620_0171:3:1102:4148:5890#0/1_A_CTCAAAGATGGGGCCACAAAAGAATTTGCAGAACTTTGCATGAACCTGAAAGTTCCTTCAAGCTCTTGTTCTTGCCCAGCAAGATGACCAAAGTCTGGGG	chromosome05	424666	425753	minus	AC	CT	0	3	0	0	3	null	Mutator	cds-cds	chromosome05	424666	-	Os05t0107600-01	null	null	null	null
Os05circ04254	HWI-ST620_0171:6:2302:8102:57415#0/2_A_GCTCTTCAGATCACAATCAAATTCAGTATGTGTGCCACGTTGCACTTGGGCGGTTGAGCCTGAAGCAGAGCAACAACAATGCATTCTCAGAAGGAACCGA	chromosome05	4309015	4309773	minus	AC	CT	0	0	1	2	3	PIF/Harbinger	null	intergenic-3utr	null	null	null	null	null	null	null	null
Os05circ00760	HWI-ST620_0167:6:2302:12809:198742#0/2_A_GTTGTTTGCTTGATGGATGGTCATTCCTGTGGTGATCTCGGGAGAGTGTCGGAAGTGATATCCGACGGCACCTCCTCTCATCCTCCTAACGCCATCCAAT	chromosome05	721172	721558	plus	AG	GT	2	1	0	0	3	null	null	intergenic-intergenic	null	null	null	null	null	null	null	null
Os05circ05665	HWI-ST620_0171:3:1204:17780:115115#0/2_A_CCGGAGCCTAAACCATACCCAGAGCCAAAGCCTGAACCGAAACCTAAGCCTAAGCCTGAGCCAAAACCTGAGCCCAAGCCAGAGCCGGAGCCAAAACCAG	chromosome05	7775958	7776935	plus	AG	GT	0	3	0	0	3	Tc1/Mariner	null	cds-cds	null	null	null	null	null	null	null	null
Os05circ06132	HWI-ST620_0171:3:2303:4417:80206#0/1_A_GGCAGTGCTTGATGTCGGGGCCGACGGCGGAGACGGTGTGGCCGGAGATGTCCAGCTTGTAGTCCTTGTTGTGCGCGTACAGCCGCCGCGCCAGCTCGTC	chromosome05	8932222	8932527	plus	AG	GT	0	3	0	0	3	null	null	intergenic-intergenic	null	null	null	null	null	null	null	null
Os06circ08008	HWI-ST620_0171:7:1104:13841:102421#0/1_A_CAAAGAAGAGGGAGGAATGTAGGGGTTTTTTCCTGGCTTTGTGGGGTCCATCGGCGACGGGAGACACCACGGTGGCGAACGGCGTAGGGGGGATGGACAC	chromosome06	10125751	10126118	minus	AC	CT	0	3	0	0	3	null	null	intergenic-intergenic	null	null	null	null	null	null	null	null
Os06circ08059	HWI-ST620_0167:5:1101:16745:20868#0/1_A_TGGCGCATCTTAACTTGCTGGCATATCTGCGCAACCCGGCCATATCTGCTCATCACTCTCCACAGAATTTTCATTCTGATCCTTCTGAACTGGCGCATAA	chromosome06	10346781	10348563	minus	AC	CT	2	1	0	0	3	null	null	cds-cds	null	null	null	null	null	null	null	null
Os06circ08303	HWI-ST620_0177:8:2106:13277:142379#0/1_A_GTGGAGGAGCTGGTTCATTCTCAGGTGGTGGAGGTGGAATCCATTCATCTTCTTATTAGACCTCAGTGATGTTGCAACAGAAACAGCTCGCTTCTTGCTA	chromosome06	11157823	11158582	plus	AG	GT	2	1	0	0	3	null	null	cds-cds	null	null	null	null	null	null	null	null
Os06circ00006	HWI-ST620_0173:6:1105:15545:157107#0/1_A_TCCTGGTGAGATCCATCGTCCCCCTCCTTGTCCTTGTCCTTGTCGTTGAGGAGGTGTATGGGCTTGGGCACATTTTGCAAGGGAAAATATCTCCCCCTTG	chromosome06	130603	133823	plus	AG	GT	3	0	0	0	3	null	null	cds-cds	null	null	null	null	null	null	null	null
Os06circ01738	HWI-ST620_0167:4:1207:4670:64922#0/2_A_GATGGTGTGTATCCTCGTATGAGAAAAGAGGAAATCCTTCAGGTGCCCAGTTGCAGCCAAGTACGAGCATGAATGCTGATTCATTCATGCGCCTTCCTGC	chromosome06	1392634	1393396	minus	AC	CT	3	0	0	0	3	null	null	cds-cds	null	null	null	null	null	null	null	null
Os06circ09434	HWI-ST620_0166:8:2207:8820:78191#0/2_A_CTGACGATGACCGTCTTCCCGGCGCCAACTCTTTCCAAGACCTAGTGAAGGTTCCAGGAGGGTGGATCCTCAATGGGCAGAAGCGATGGCCGGCCAACGG	chromosome06	14015846	14016250	plus	AG	GT	0	0	3	0	3	null	Tc1/Mariner	5utr-5utr	null	null	null	null	chromosome06	14016250	+	Os06t0347100-01
Os06circ02205	HWI-ST620_0167:6:1301:15002:99729#0/2_A_GCTACTACCTCGGCATGTTCCTCGGCGGCGCCTACCAGGAGGCCCTCGGCGGCCTCCACAACCTGTTCGACGAGCTCACCGACGACTGCCACGCCGACTA	chromosome06	1674011	1674511	plus	AG	GT	3	0	0	0	3	null	null	cds-cds	null	null	null	null	null	null	null	null
Os06circ09867	HWI-ST620_0166:6:1106:17210:26935#0/2_A_GACCGGACGTGCGTGGCGTTGCGCTGGAAGGGGAGAACGGCCGGGCCGTGGACGCTGCAGCGGTGGCCGGGGAGGATGGAGACGTGATCCGGAGGCTGCA	chromosome06	16888620	16888724	minus	AC	CT	0	0	3	0	3	null	null	intergenic-intergenic	null	null	null	null	null	null	null	null
Os06circ10044	HWI-ST620_0166:6:2308:18327:190110#0/1_A_CTGGGAGAAGCCAAGTATGCAAAACAAAGGGGCACTCAAGCAGTCGAGACTTTTAGGAACCATATCCAGATGACTGCATCACATCTCCCATACACTCGCA	chromosome06	16894944	16896310	plus	AG	GT	1	0	2	0	3	Mutator	null	cds-cds	chromosome06	16894944	+	Os06t0476200-01	chromosome06	16896310	+	Os06t0476200-01
Os06circ10219	HWI-ST620_0177:7:1307:3942:105203#0/2_A_CTGGATGGTGCTCTCGCCTCTTCTTTCCCCAGACGCCCCCTTGAGGCACTAAAGATGGGATAAGACGAGAAGTACAAACCATGAGCTTGATTGATCATCC	chromosome06	17486517	17489672	minus	AC	CT	0	0	1	2	3	Tc1/Mariner	null	cds-cds	chromosome06	17486517	-	Os06t0486400-01	chromosome06	17489672	-	Os06t0486400-01
Os06circ10291	HWI-ST620_0167:4:2107:11316:93317#0/1_A_GTACAATGCGCTGAGCTTCAGCTTGAGCCTCCTGCTTGTCCTGCTCCTCCTTTATTACATCACCAACTTTGATATCCTTCCATTTTTTCTCTTCAAAATC	chromosome06	17675557	17676764	minus	AC	CT	1	2	0	0	3	null	null	intergenic-intergenic	null	null	null	null	null	null	null	null
Os06circ10581	HWI-ST620_0171:8:1102:6089:12262#0/2_A_GGAATGATGGAGGAGTGGCACCAGAAAGTGGACAACAATACAAGCCCAGATGATGTAGTGATCTGCCAGGCACCTCCCTCAAGCATATTGCCATCTGGTT	chromosome06	18368832	18370629	plus	AG	GT	2	1	0	0	3	null	null	cds-cds	chromosome06	18368832	+	Os06t0498400-01	chromosome06	18370629	+	Os06t0498400-01
Os06circ10711	HWI-ST620_0171:8:1206:10021:8866#0/1_A_GTCTGCTTTGATTCAAGCAACCTTTTTGCAATCACCTTGCGTATCTGACTGAGGAGGATTGATGATTGCACAGAAGTGGTCGACTGGGTACATTCCCAAA	chromosome06	18476079	18478817	minus	AC	CT	0	3	0	0	3	Mutator	null	cds-cds	chromosome06	18476079	-	Os06t0499900-01	null	null	null	null
Os06circ02805	HWI-ST620_0171:6:1303:19548:199007#0/1_A_CGGGGAATATATGCTGCTGATAAAGAAGCCTCAAAAAAATAGAGGAGGAACTCATAGATTGAGAGTGATTCCTGAAAACCAGGACAACCAGTGACCCTGC	chromosome06	2011971	2014463	plus	AG	GT	0	0	1	2	3	null	PIF/Harbinger	3utr-3utr	null	null	null	null	null	null	null	null
Os06circ11125	HWI-ST620_0177:8:2304:7236:151091#0/1_A_CTCCTTTCTTGTACTCAACAGGGCAATCCAGAAGGATAATGCGGGGGTTGACTATCTTCTTGACCTCAAAGAGGCCAGCTCTTGTTCCAACATCCGATTC	chromosome06	21039430	21039901	plus	AG	GT	1	2	0	0	3	null	null	cds-cds	null	null	null	null	null	null	null	null
Os06circ11244	HWI-ST620_0166:6:2105:20177:55745#0/1_A_TCACCACACATCCCCTCAAAGAAGCTCTTCACAGCATCTTCAGGAACTTGAACAAACTCAACAAACGCGATGCATGTGGAGTGCACATAATCACCCAGTA	chromosome06	21256341	21256549	plus	AG	GT	0	0	3	0	3	hAT	null	intergenic-intergenic	null	null	null	null	null	null	null	null
Os06circ11284	HWI-ST620_0177:8:2308:18257:155495#0/1_A_GGCTGGAGTGGGAGAGGAGGAGGCGGAGAAGCTCCTCCTGGCCCGCGTGGCGTCCATCTCGATCCGCTCCCCCTCTCCCCGCAGCCCCTCGTCCGCCGGC	chromosome06	21543560	21544020	minus	AC	CT	0	3	0	0	3	Mutator	null	intergenic-intergenic	null	null	null	null	null	null	null	null
Os06circ11637	HWI-ST620_0171:7:1304:19971:10739#0/1_A_CACGGGATTTGGCCATTGCCATTGAGTACAAACTCTAAAGAATCTTTAAAGTAAGTTGTCTTAACCGAGATTCAACCCATCCCTTCCAAAGTCTAAGATC	chromosome06	22222601	22223081	minus	AC	CT	2	1	0	0	3	Tc1/Mariner	null	intergenic-intergenic	null	null	null	null	null	null	null	null
Os06circ11845	HWI-ST620_0171:8:2301:6183:166426#0/2_A_TGGTGAAACTTCAGCTGGTAAATCATCTCAGGAGGACAAGAACATTGTACCAGAAACTGCAAGTGAAGCTTCTGTTGACCATGCAACTGAGGATAAAAAG	chromosome06	22487931	22488086	minus	AC	CT	2	1	0	0	3	null	null	intergenic-intergenic	null	null	null	null	null	null	null	null
Os06circ03125	HWI-ST620_0166:6:2108:4980:199986#0/2_A_GTGGTGATGAGGATGGACATGTCATCCGCGCATCGCTGCACCTGCAAAAAACGTGCATGGAGACGTCGACGCACTCGTCGTCGATCCTGATAACCCCAGC	chromosome06	2431299	2432226	minus	AC	CT	0	0	3	0	3	Mutator	null	intergenic-intergenic	null	null	null	null	null	null	null	null
Os06circ13015	HWI-ST620_0173:6:1205:7435:115123#0/1_A_CTCTTGGCCGCCGTCAACCCCTCCTCCTCCACCACCTTCAAGTCCGGGCAACCCTGAGCAATTGCAGCGAGGCCCTTGTCGGTGATCAGCGGGCAGCCGG	chromosome06	24911167	24911808	plus	AG	GT	1	2	0	0	3	null	null	cds-cds	null	null	null	null	null	null	null	null
Os06circ13073	HWI-ST620_0171:3:1307:4444:80807#0/1_A_GGCTCTTCTTCATCATTTTTGACAGAACATTGGTTAGATGTTTTCTGAGTTTTCTTTGATTTCGCCTGCATGTTGCTTTTCTCCAATTCCTGTGCATGAA	chromosome06	24970992	24971300	minus	AC	CT	2	1	0	0	3	PIF/Harbinger	null	cds-cds OR 3utr-intergenic	chromosome06	24970992	-	Os06t0606800-01	null	null	null	null
Os06circ13087	HWI-ST620_0167:5:1106:9616:40791#0/2_A_GCTTGAGGAGAAGATTCATGCACAGGAATTGGAGAAAAGCAACATGCAGGCGAAATCAAAGGAAACAGAAGAAGCCACCTCACAGCCAGAAGACGTAAAG	chromosome06	24970992	24972248	minus	AC	CT	2	1	0	0	3	PIF/Harbinger	null	cds-cds	chromosome06	24970992	-	Os06t0606800-01	null	null	null	null
Os06circ13911	HWI-ST620_0173:6:2108:13727:177423#0/2_A_GTCCTGATGAAGCGGATATTTTTATCTGCTCTGCATTTTCGAATCAATACAAGATATAAGAGCAGATACATAAATGGGATCCTGATAAGATCCGCAGATT	chromosome06	26083650	26084761	minus	AC	CT	3	0	0	0	3	null	null	intron-cds OR cds-intergenic	chromosome06	26083650	-	Os06t0625400-01	null	null	null	null
Os06circ00365	HWI-ST620_0173:6:1206:2425:142147#0/2_A_CAGCTCACCTAGATAAACAGAAACAAGAATCAAAGAGACCATTGCCAGCTGAGTCATCTTCCCAACTTCAACCCAGCAATACAAAGAAAGAAGACTTCGG	chromosome06	269280	269663	plus	AG	GT	3	0	0	0	3	null	null	cds-cds	null	null	null	null	chromosome06	269663	+	Os06t0103800-01
Os06circ14773	HWI-ST620_0171:3:2301:13299:135400#0/1_A_TGCGCTGCCAACACTCTTCATGGTCATAGCAGAGAACCAGTATGATGCTAATAAGCTTAGCATGATCGACTGATGGACAGACAGTAATAACAAATAGGAA	chromosome06	27154145	27155039	minus	AC	CT	1	2	0	0	3	null	Tc1/Mariner	intergenic-intergenic	null	null	null	null	null	null	null	null
Os06circ03335	HWI-ST620_0166:8:2208:15337:95959#0/1_A_TGTCGCGCACGAACAGCACCGGGCCGAGCTGCACCATGAACAGCGGCGGCGCGGCCGCGGCCACCATTCTTGCGCTCGAAGCCGTACCAGATGAGATGGC	chromosome06	2724822	2724954	minus	AC	CT	0	0	3	0	3	null	null	cds-cds	chromosome06	2724822	-	Os06t0152800-01	null	null	null	null
Os06circ15971	HWI-ST620_0167:4:2103:14341:152554#0/1_A_GGCCACTTTTGTGTTGTGCTTGTGTGTGTGTGGCCTCTACATAACTCCCGACAGACTCCGGGCTGTACCTTACTTCACCAAGAGCATTAGCAGTGCCCTC	chromosome06	28374175	28376508	minus	AC	CT	2	1	0	0	3	null	Tc1/Mariner || PIF/Harbinger	cds-cds	chromosome06	28374175	-	Os06t0665500-01	null	null	null	null
Os06circ16062	HWI-ST620_0173:6:1302:11153:94631#0/1_A_GCTTGGCTAGGCCAGTAATTTGCTGCAAGTCACCAGCAGCTCCTGTGGTCATCTCTCAATGTCTCCTTCTCAAGGAGCACCTCCACGATCTTGTCCATGG	chromosome06	28601850	28602397	minus	AC	CT	2	0	1	0	3	null	null	cds-cds	null	null	null	null	null	null	null	null
Os06circ17583	HWI-ST620_0167:4:1305:5141:63907#0/2_A_CAAGATGTTTGTCCTTGATGAAGCTGATGAAATGCTTTCTCGTGGTTTCAAGGATCAGATTTATGATGTGATTCAGCAAGCTCAGTCAGGAACAGGAAAG	chromosome06	30382238	30382615	minus	AC	CT	2	1	0	0	3	null	null	cds-cds	chromosome06	30382238	-	Os06t0701100-02	null	null	null	null
Os06circ17844	HWI-ST620_0167:5:2202:7874:43575#0/2_A_CTTGGAACTCCATCATCAGAAACCTTATCCAGGATATTTATGTTGTTTTTGAGCTCATGGAATCAGATCTCCATCAAGTCATCAGAGCGAACGATGACCT	chromosome06	30828531	30829553	plus	AG	GT	3	0	0	0	3	null	null	cds-cds	null	null	null	null	chromosome06	30829553	+	Os06t0708000-02
Os06circ18240	HWI-ST620_0177:6:2108:10013:186819#0/1_A_CATACAAATGTTTGGTTGGTCCTTTATTATTTCTATTTGTGCACAGGTTCTTTTTGGATAAAAGGGATATCTTGATCACCGAAAGCCTCAAGAGGGAAGT	chromosome06	31103574	31103673	minus	AC	CT	0	0	3	0	3	null	null	cds-cds	null	null	null	null	null	null	null	null
Os06circ19339	HWI-ST620_0173:6:2306:17022:155258#0/1_A_TGGCCCCCTTCATGGCTGAATCCTCACCTGGGGAGAGTCTGGCGCTCTCGCCCTTGTTGTAGGCAGCAATGGCCTTGTTGTACTCGGCCTTGAGCTTGTT	chromosome06	31870401	31871313	plus	AG	GT	1	2	0	0	3	null	null	cds-cds OR 5utr-intergenic	null	null	null	null	chromosome06	31871313	+	Os06t0728000-02
Os06circ00699	HWI-ST620_0167:5:1306:2180:40071#0/2_A_GCTGTGGGAGCTCCTGAAGAAGGACCACACCTATGTGACTTGAAGCCTGGTTCTGATGTCAAGATAACCGGACCAGTAGGCAAAGAAATGCTCATGCCCA	chromosome06	478660	479354	minus	AC	CT	3	0	0	0	3	null	null	cds-cds	null	null	null	null	chromosome06	479354	-	Os06t0107700-01
Os06circ04785	HWI-ST620_0171:2:1203:13432:33423#0/1_A_GTTCCAAGAAGACACAAGATATTATATTGAGATCTTCACATCCTTTCTGCGGCTGAACTATGTTAATGGCACTACCACATAAACCTGATTTTTACTTCTT	chromosome06	4799800	4800163	minus	AC	CT	0	1	0	2	3	null	Mutator	intron-intron	null	null	null	null	null	null	null	null
Os06circ00757	HWI-ST620_0167:4:2305:1401:59327#0/1_A_GGGCTCCTTGGGCCTGTACTTGTTGGTGACGACGCCCTCGTCATGCTTCTTGGATATCTTCTCCTTCTTGTAGAGTAAAGAACTGCTAGTTGGGACTCCC	chromosome06	478916	480331	minus	AC	CT	2	1	0	0	3	null	null	cds-cds	chromosome06	478916	-	Os06t0107700-01	null	null	null	null
Os06circ05085	HWI-ST620_0171:8:2103:6519:195625#0/1_A_CTCTTCTCTTGCACCGCCGCTAATCTTTCACTGCTTCCTCTCAATGTCGACAACGACGACGACGGCTACTCCTCTCTCCTTACCGCTCCTTCTCCCAGAC	chromosome06	5044775	5045023	minus	AC	CT	0	3	0	0	3	null	null	intergenic-cds	null	null	null	null	null	null	null	null
Os06circ05537	HWI-ST620_0167:6:1201:13159:69523#0/2_A_CAAGGCTGGAGCTTCTTTGTATGGTATTGGTGGAGAGTGGGAAAGTAGATGAGCGACGCCTTTGTATTACTGGGCGATCAGCAGGTGGGTACACTACGTT	chromosome06	5863260	5863386	minus	AC	CT	1	2	0	0	3	null	null	cds-intron	null	null	null	null	chromosome06	5863386	-	Os06t0215300-01
Os06circ06337	HWI-ST620_0171:7:2304:3957:165071#0/1_A_CCATTGCCAGAAAAGTCTACCTCTTCTGCACTCTTGTTATAGGCTAAGCTTTCTGCTAGAAAAAACAGACCCTCATCACTTATATCGTTCATGTATAGAC	chromosome06	7150144	7152955	minus	AC	CT	1	2	0	0	3	null	Tc1/Mariner	intergenic-intergenic	null	null	null	null	null	null	null	null
Os06circ01417	HWI-ST620_0167:4:1102:5453:103253#0/2_A_GCCGCTATCAAAGCCCCTGGTTTTGGTGAGCGCAAGACCCAGTACTTGGATGATATTGCCATTCTAACTGGAGGATCCTGTTGAAAATATTGGAGCTAAG	chromosome06	812507	813570	minus	AC	CT	3	0	0	0	3	null	null	cds-cds	chromosome06	812507	-	Os06t0114000-02	null	null	null	null
Os07circ00949	HWI-ST620_0173:6:1301:17298:119043#0/1_A_GTTGGTCGTGTCAGATGCCAAGCAGGCTGCGTCGTGGCCGTTGCGATGGAACCAGTTGGACCGTTTGATCGCACTGAATTTCTATGAGGACATTGGAGTA	chromosome07	1823619	1824453	minus	AC	CT	1	0	1	1	3	null	null	cds-cds	chromosome07	1823619	-	Os07t0134000-02	chromosome07	1824453	-	Os07t0134000-02
Os07circ08343	HWI-ST620_0166:6:1202:16046:158756#0/1_A_GCTCTCGTTGTACGGTGGCTTCAATGGGAACACCAAAGACTAACAGATCCCATTCTGTGGTATTTGATGTTGTATCCACAATTTTTGGAGGTGCTTTTAG	chromosome07	18570284	18571689	plus	AG	GT	0	0	1	2	3	null	null	cds-cds	chromosome07	18570284	+	Os07t0486500-02	chromosome07	18571689	+	Os07t0486500-02
Os07circ08707	HWI-ST620_0167:5:2303:12728:99830#0/2_A_GCAAGGTTAGAACTGAGCCAAGTTGAATCACTCGCATGCTCATCTTGCCCTGCTCGAAAATGTGTGGATGCATCTAGATCCATGTGAAGGAGTCTATGAT	chromosome07	19310012	19310652	plus	AG	GT	2	1	0	0	3	null	null	cds-intron	chromosome07	19310012	+	Os07t0497400-01	null	null	null	null
Os07circ08867	HWI-ST620_0167:4:1307:8265:140989#0/1_A_CGCGGAGGAGTGTATATGTAGGCGGCGGCAGCGGTTTGGGCGAGGAGGTGCGCCAGCGCGACGTGGAGCAGGAACGGCGCCAGGGAGCAGGCGACGAGCG	chromosome07	19618277	19623242	plus	AG	GT	3	0	0	0	3	null	Tc1/Mariner	intergenic-intergenic	null	null	null	null	null	null	null	null
Os07circ10301	HWI-ST620_0177:7:2105:19752:63202#0/1_A_CCGCCATGGTGGTGCGCAAGCCGGCGCACCTGTACGAGCTCTCCAAGGACCCCTCCGTCAGCGTCGCCGTCATCGAGCAGTCGGTGTCCCCCGGCGGCGG	chromosome07	21385101	21385226	minus	AC	CT	0	0	2	1	3	null	null	intergenic-intergenic	null	null	null	null	null	null	null	null
Os07circ10895	HWI-ST620_0171:8:1305:10512:61370#0/1_A_GGGGAGTGGACGACGACGACGAGATGGAGTTGCAGATGGCGCCGCCGGTGCGCGGCGCGACGGAGACGGTGGGGCGGACGATCTCGTCCTCGGCGGTGTT	chromosome07	21384876	21385613	minus	AC	CT	0	3	0	0	3	PIF/Harbinger || hAT	null	intergenic-intergenic	null	null	null	null	null	null	null	null
Os07circ01489	HWI-ST620_0177:8:2304:8836:191963#0/1_A_CCGGGGACGGGGAGGCGACGCGCGCGGCGACGCGGGCCGTGGACAGCTGGTGCTTGCCGCCCTCGTCGCCGTCCGCCGTCCTCGTCAGCACCGTTACGCT	chromosome07	2169397	2170354	plus	AG	GT	0	3	0	0	3	null	null	intergenic-intergenic	null	null	null	null	null	null	null	null
Os07circ01722	HWI-ST620_0171:4:1304:13512:152931#0/1_A_GTGTATTTTCCTGACAGAACACCTTGAGCGATCGGGGAATATGCGATCAAAGTAATACCAAGCTCATCACAAGCCGCTTTTACCCCATTTTCTTCAGGGT	chromosome07	2228318	2232370	plus	AG	GT	0	3	0	0	3	PIF/Harbinger	null	cds-cds-acrossGene	chromosome07	2228318	+	Os07t0142900-01	chromosome07	2232370	+	Os07t0143000-01
Os07circ12584	HWI-ST620_0171:3:2302:19927:154764#0/1_A_GTGATGGAGATGAGCGCGTCGAGGTCGTCCTGGGGGAGCAGCTGATCCGCGCCGTGCTCTGCCTCCCTCCCTCCTCTCCACTTGCGGGGCCTACGAGGCG	chromosome07	22847903	22848752	plus	AG	GT	0	3	0	0	3	null	null	cds-3utr	null	null	null	null	null	null	null	null
Os07circ13988	HWI-ST620_0167:6:2205:9560:28718#0/1_A_GGTTGCTGTCCGGGACGATGGCGAGCGGGTTCGTCTCCTCGAGCTTCCTCTCGTACTTCTTGAGCCAGGCGTTGGCCTTCTCGACCTGGTCGCCCTCCCA	chromosome07	23550192	23550491	minus	AC	CT	3	0	0	0	3	null	null	cds-cds	chromosome07	23550192	-	Os07t0569100-01	null	null	null	null
Os07circ14062	HWI-ST620_0167:5:2306:5651:37157#0/2_A_GTCAACAACCGCTTCAAGCGCGAGGAGGGAGTCGTGGGAGTCCGCGGCGGGGAGCAGGCACACGTCGATCCGCTCCGTGGGGAGCGACACCGCCCCAAGT	chromosome07	23550258	23550705	minus	AC	CT	3	0	0	0	3	null	null	cds-cds	null	null	null	null	null	null	null	null
Os07circ14292	HWI-ST620_0167:5:1205:8701:191628#0/2_A_GGAGGAGCTCGAGGAGCCGGAGTTCAGGGACATCCTCGAGCTCCTCCTCCACCACTCACCACCACAGCTCAGCTCGGAGAAGCGAAGAGGAGGAAGAAGA	chromosome07	23549870	23551095	plus	AG	GT	3	0	0	0	3	null	null	5utr-3utr	null	null	null	null	null	null	null	null
Os07circ14344	HWI-ST620_0177:8:1104:9093:113217#0/1_A_CTGAGTAGTGTGAATCATAAAATTTAATAAGCATAATCATTTAAATAATCCATGAGCAACCTTGTGAATACATCAGTAAGAACTGATGATTCAGGAGAAC	chromosome07	23621362	23626789	minus	AC	CT	0	3	0	0	3	null	null	cds-cds	chromosome07	23621362	-	Os07t0570300-01	null	null	null	null
Os07circ15633	HWI-ST620_0173:6:1107:21251:183448#0/1_A_GGCGCACGCAGCCGCGGAGGAAGCAGGTGGTGGTGGTGGTGGTCCACCAGGCCTGGCTGCAAGGGCCTGAAGGAGAGAGATCCACTGAGCCCCTTGAGAG	chromosome07	24310761	24313214	minus	AC	CT	3	0	0	0	3	null	null	intergenic-intergenic	null	null	null	null	null	null	null	null
Os07circ17100	HWI-ST620_0171:6:1102:14776:142002#0/2_A_CGTGCGCACAACTACAAAGGGATGGCTTGAGGATCCATCTAGAAGATAGCAATGGGGGAAACTACTGGAGAACGTGCCCTGACCCGTCTCCACAGCATGA	chromosome07	26090728	26092064	plus	AG	GT	0	0	0	3	3	null	null	5utr-cds	chromosome07	26090728	+	Os07t0616800-01	chromosome07	26092064	+	Os07t0616800-01
Os07circ17950	HWI-ST620_0173:6:1204:14631:114971#0/1_A_GGCTTGGGGCAGGGGACGGCCGGGAGGAAGGTGGGGGTGAGCGAGGTGGAGAAGAGGGTGATCTTGGCGCGAAATCATCCCGAGGCGGAGGCGGCCCTGA	chromosome07	26871981	26873360	minus	AC	CT	2	1	0	0	3	null	null	intergenic-intergenic	null	null	null	null	null	null	null	null
Os07circ18019	HWI-ST620_0167:5:2203:18598:69094#0/1_A_GGCTTGGGGCAGGGGACGGCCGGGAGGAAGGTGACAAAACCAAAACCCCTCGACCTGCCGCTCTCCCTGTCGTAGATGACCTTGGCATCGAGCACGGTTC	chromosome07	26872008	26873535	minus	AC	CT	3	0	0	0	3	null	null	intergenic-3utr	null	null	null	null	null	null	null	null
Os07circ18044	HWI-ST620_0167:7:1206:7221:186534#0/2_A_TTTTGGTTATGTTGATTTAGAGGTTGTATATGACAGACAGACCGGAAGAAGCCGTGGCTTTGGATTCGTCACAATGTCTACAGCTGAAGAAGCTGGTGCT	chromosome07	26872812	26873835	plus	AG	GT	3	0	0	0	3	null	null	ncRNA-ncRNA OR intergenic-ncRNA	chromosome07	26872812	+	Os07t0631900-01	null	null	null	null
Os07circ18048	HWI-ST620_0177:8:2303:9184:184859#0/1_A_GCTTGGGGCAGGGGACGGCCGGGAGGAAGCACATCATCAACCTCTAAATCAACATAACCAAAAAAAAAATCTCAAAATTGGCGCCTTGGCTTTGATTCTG	chromosome07	26872008	26873847	minus	AC	CT	1	2	0	0	3	null	null	intergenic-3utr	null	null	null	null	null	null	null	null
Os07circ18644	HWI-ST620_0166:8:1303:8524:59574#0/2_A_CGAACATATGCGACCGGTATCACAAAGGGTGGTAAACTATGCGGACCCATTGTTTGAAAATGGAAGTGCACCTATAGAGGACATGAGGACACAGCCTTCA	chromosome07	27614386	27614995	plus	AG	GT	1	1	1	0	3	null	null	intergenic-intergenic	null	null	null	null	null	null	null	null
Os07circ18840	HWI-ST620_0167:5:2201:8120:124875#0/1_A_TGCATGAATTTGCCTGCTTAATTAATACTGGTTTGATACTTTCTTTATGGGTGATTGTTGGGTTTACTGTGATGCTTGATACATTGTACTACTGGCCAAA	chromosome07	28301011	28301576	minus	AC	CT	2	0	0	1	3	null	PIF/Harbinger	intron-intron	null	null	null	null	null	null	null	null
Os07circ02229	HWI-ST620_0166:8:2106:12487:163799#0/2_A_GCCAGCTGGACTACGTCCCGGCCACCATCAGCGCCCTCGAGGAGGGAGAGATCACTGCAGAAGACACGAGGCTCGCCGTGGAGAACGGCGCGGCCGGCAT	chromosome07	2832536	2832742	plus	AG	GT	0	0	3	0	3	null	null	cds-cds	null	null	null	null	chromosome07	2832742	+	Os07t0152900-01
Os07circ18970	HWI-ST620_0171:5:2208:16264:90730#0/1_A_GCCAGGAATAGATATTTTCATTAAGAAAAAAGAGGCCCAAGAAAAAGCAGAACTTACTGAAGAGAAGATGATAAAAAGGATACATCTTCCCATAAAATAG	chromosome07	28367132	28367581	minus	AC	CT	0	2	0	1	3	null	null	intron-intron	null	null	null	null	null	null	null	null
Os07circ19327	HWI-ST620_0177:7:1306:5164:48092#0/2_A_CAATAAAGCCTGTCAACTTCCAGTCATCTGTTGCTATGGACAATGAAACGGTCTTGAGACACCAGCAGTTGGTGTTATACCAATGGATGAGTCAAAGGTA	chromosome07	28393101	28393432	minus	AC	CT	0	0	2	1	3	null	null	cds-cds	chromosome07	28393101	-	Os07t0658400-01	chromosome07	28393432	-	Os07t0658400-01
Os07circ19881	HWI-ST620_0171:7:2103:11176:178569#0/2_A_TGACTGACAAACCAAGCAAACTTGACTGCAAAGAACTTAAGGTCTCCACTTGTAGAATCAGTAAGGCTGGGGTTGGAGGGCCTCTTATTGATTTGGATGG	chromosome07	28762432	28766785	minus	AC	CT	1	2	0	0	3	PIF/Harbinger	null	cds-cds	chromosome07	28762432	-	Os07t0665700-01	chromosome07	28766785	-	Os07t0665700-01
Os07circ21218	HWI-ST620_0171:7:2304:8910:35773#0/1_A_GCGTCTTTGCTTGAAGCTGCTTTTTGCCCATATCTTTTGTGCTTTCCTGGCTTGCGCAACATGCTCTGAAAACTTTATAACTGCTGCATTACCAGAGAAT	chromosome07	29934941	29936155	minus	AC	CT	0	3	0	0	3	null	null	cds-cds	chromosome07	29934941	-	Os07t0688800-01	chromosome07	29936155	-	Os07t0688800-01
Os07circ21730	HWI-ST620_0167:5:1106:10518:195972#0/2_A_CGACTGCTGTAAATGCTGAACGGCCAAATATGGAGATCGCTAATGGCACCATCAACAAAAGTGGACCTGGAGGAACAACGGAATGTTTTGAGACGATCAG	chromosome07	30287200	30287977	plus	AG	GT	3	0	0	0	3	null	null	cds-cds	null	null	null	null	null	null	null	null
Os07circ03685	HWI-ST620_0171:4:2305:12758:130927#0/1_A_GGTTGAGCTTGAGCACAGCGGCGACATTCTTGAGCGGGTTCTTCCTCTTCTCCCTGCGCTTGACCTTAGCAGCCTCCTCCGGGCTAAGCTTGGTCCTCTT	chromosome07	4296325	4297408	plus	AG	GT	2	1	0	0	3	null	null	cds-cds	null	null	null	null	null	null	null	null
Os07circ03918	HWI-ST620_0166:6:2107:5647:113818#0/2_A_GAAGAATCTGGTTATTAGAGCAAAACCCATGCCAAGCTTCTATCAAGAGGGTCCCCCACCTAAGGTTGAACTTAAGAAGAGTCCATCAGTGACACCCAGG	chromosome07	4565355	4567712	plus	AG	GT	1	0	2	0	3	null	null	cds-cds	chromosome07	4565355	+	Os07t0185432-00	chromosome07	4567712	+	Os07t0185432-00
Os07circ04681	HWI-ST620_0166:7:2304:12943:128207#0/2_A_CTCCAGTATCTCCACAAAACACAAGCTCTTGTGGTGCTTGGAATAATCAATGAACGCATAGATTTTCAAGCAAATGGAAGTGGCTCGATCTTTAAGGCAG	chromosome07	5693671	5693982	plus	AG	GT	0	0	3	0	3	null	null	cds-cds OR 5utr-5utr	chromosome07	5693671	+	Os07t0205200-02	chromosome07	5693982	+	Os07t0205200-02
Os07circ04719	HWI-ST620_0173:6:2308:14349:114502#0/1_A_GTTCTTTTGGGGGCTCTGGCCTTGATTCTCTATACGAATGCCAAAGGAATTGTCTTCGTAATAACCAGGCTCATTGCTTACGATCATGCCCTTCTGTAAA	chromosome07	5725775	5730189	minus	AC	CT	3	0	0	0	3	null	null	cds-cds	chromosome07	5725775	-	Os07t0205700-01	null	null	null	null
Os07circ05467	HWI-ST620_0171:7:2206:8992:47217#0/1_A_GTGACATGTACAGCGGCACGTGTGGCACTGGGCGATGGCCTTGATTCAAATTATCATATCTAAAGCATTCTAGCTTCAATGAATCGCTCATTGTTAAATA	chromosome07	7745969	7746794	plus	AG	GT	0	3	0	0	3	null	null	5utr-intron	null	null	null	null	null	null	null	null
Os08circ06153	HWI-ST620_0166:7:1106:8502:173867#0/1_A_GTTGTCTAACCACGAGATGCAATGTATGGCCATCTTCCACGTAAGACCAAGACTAACGTTTGGTTCTGATAACCCAACTGACGTTTCAGACTGGAAAAGT	chromosome08	11963417	11964837	minus	AC	CT	0	0	3	0	3	null	null	intergenic-intergenic	null	null	null	null	null	null	null	null
Os08circ06229	HWI-ST620_0167:7:1206:11524:40325#0/2_A_GGACGATAAGGAAAACAAGGGTTTAGATAAGGAAGGAAAGAATGGCAAACCAGGGAAGCCCAGTGCAGGAGCTGATTCATGTCGAAGATTATGAGCAAAG	chromosome08	12076603	12076849	minus	AC	CT	3	0	0	0	3	null	null	cds-cds	null	null	null	null	null	null	null	null
Os08circ01334	HWI-ST620_0167:5:1201:15691:142377#0/2_A_GCTTGATGAAGCCCTAAAGAAGGAGGGTGACGAGAACGTGGCTAGTGAGGAGGAGGATGAAGAAGATGGTTTGAAGATAGATGAGGCTAAAGTTGATGAG	chromosome08	1585459	1587433	plus	AG	GT	3	0	0	0	3	null	null	cds-cds	null	null	null	null	chromosome08	1587433	+	Os08t0127700-02
Os08circ01335	HWI-ST620_0171:8:2103:5568:133212#0/2_A_CTGGGGAACTGATGTGCCTAATGATATTGTTCTTGACAAGAAGCTGCTTGATGAAGCCCTAAAGAAGGAGGATGAAGAAGATGGTTTGAAGATAGATGAG	chromosome08	1585489	1587433	plus	AG	GT	1	2	0	0	3	null	null	cds-cds	null	null	null	null	chromosome08	1587433	+	Os08t0127700-02
Os08circ08009	HWI-ST620_0171:5:1103:8897:65990#0/2_A_GACGTCGTCCTCGACGCCGTCGGCCAGGGCGAGAAGGCCGTGAAGGGGCTGAAGGAAGGGGACGAGGTGTACGGCAACATCAGCGAGAAGGCGCTGGAGG	chromosome08	17944235	17944887	minus	AC	CT	1	1	0	1	3	null	null	cds-cds	null	null	null	null	null	null	null	null
Os08circ08096	HWI-ST620_0167:5:2103:2712:77001#0/1_A_GAGGGATTGCATCGTCGTCGTCGTCGTCGTCTCCTTGGTGTAGTCGATGGCGACGTCGGCGCCGAGGCTCTTGAGGAGCTCCAGCTTGGGCGTGCTCGCC	chromosome08	17944403	17945472	plus	AG	GT	3	0	0	0	3	null	Tc1/Mariner || PIF/Harbinger	3utr-3utr	null	null	null	null	null	null	null	null
Os08circ08171	HWI-ST620_0171:6:2201:15098:196828#0/1_A_GGTTGATCAGTTTTTGTCTTAGTAGTATATTCATGAAGAATTGATTTGCTGAACACAACATCCTCAGGCTGTGAAGGGCAAGATGCTACTGTGCAACTCT	chromosome08	18192733	18193552	minus	AC	CT	0	0	1	2	3	null	null	cds-3utr	chromosome08	18192733	-	Os08t0384100-01	chromosome08	18193552	-	Os08t0384100-01
Os08circ08941	HWI-ST620_0167:5:1308:12042:139731#0/2_A_CAGCGGCAGTGGTGGCAGAATCTGCTACAGTTATGGAGGTTGTACAAGGAGCGCCTCAAGGAGTGGGAATTTAGAGAGAGAGAAAAAGAATATCAAAGAC	chromosome08	20002850	20003213	minus	AC	CT	2	1	0	0	3	null	null	cds-cds-acrossGene	null	null	null	null	null	null	null	null
Os08circ01770	HWI-ST620_0167:7:1102:17628:164693#0/1_A_GGTGGTTGTGCTGAAGGCATACATGTTCTTCTTGGCTTCCTCCATGCTGCCAAGGACGGTGGCGAGGGTGTTGAGGTAGGTTGGGTAAGTGCATGGAATT	chromosome08	2177840	2178821	plus	AG	GT	3	0	0	0	3	null	null	intergenic-intergenic	null	null	null	null	null	null	null	null
Os08circ10355	HWI-ST620_0166:7:1204:10392:108112#0/2_A_TGCCACCACCGAAACTTGATTTCACTTCTCAGCACCAGGAATGGGTAGAGCAAGAAGCAAATGAGCTTTGGTGAAATGGTTGCTTGCTTCCGATATGCAT	chromosome08	22094956	22095079	plus	AG	GT	0	0	3	0	3	null	null	cds-cds	chromosome08	22094956	+	Os08t0450800-01	chromosome08	22095079	+	Os08t0450800-01
Os08circ02069	HWI-ST620_0166:8:1108:18956:49173#0/2_A_CGCCAAGCTCGACTTTGGGATTTTGCAATCTCTGTATTGCGCGGACGAAGGGTGCAGTGCACTTAGGACCCCTCTTTTCAGGAGGCCAAGAAGAGTTGAA	chromosome08	2211494	2211655	plus	AG	GT	0	0	3	0	3	PIF/Harbinger	Tc1/Mariner	intergenic-intergenic	null	null	null	null	null	null	null	null
Os08circ10848	HWI-ST620_0167:4:2207:14198:28076#0/2_A_CTTCCTTGTATACTAACCAAAGTAAACATCAATTTAGTAGTAAGTTAACAGAACAATATAGGAGGAGGTCCCATACACCAAGGTGGTCAGATGTACGCAG	chromosome08	23681890	23682361	minus	AC	CT	2	1	0	0	3	null	null	cds-cds	null	null	null	null	null	null	null	null
Os08circ12712	HWI-ST620_0167:6:2102:18755:70118#0/1_A_GGGTGTAGGGCCAGTAGGTGCCCATCTTGTAGAACTTGAGGTAGTACCGCTTCCAGGCGTGCTTCACGATCTCGGCGCTGTCGATGTACGGCGGCACGAC	chromosome08	24916735	24917109	plus	AG	GT	3	0	0	0	3	null	null	intergenic-intergenic	null	null	null	null	null	null	null	null
Os08circ12713	HWI-ST620_0167:7:2101:19411:93240#0/1_A_TGGATGGATGGGGTGTAGGGCCAGTAGGTGCCCATCTTGTAGAACTTGAGCCCCCACGCCTCCACGGCCAGCCTGGTGGCGGTGCCGAGGCGGTTGTGCC	chromosome08	24916849	24917109	plus	AG	GT	3	0	0	0	3	null	null	intergenic-intergenic	null	null	null	null	null	null	null	null
Os08circ13572	HWI-ST620_0177:8:1106:4256:69561#0/1_A_TAATCTACAGTAGCTGTAACCAGCTCCTCAAATGTTTCAGTGTCTTCCCTGTTGTCATCAGCTCTATTCTCCAACAGATTAACAGCTATGAAATCCTGCT	chromosome08	25550649	25551284	minus	AC	CT	1	2	0	0	3	null	null	intergenic-intergenic	null	null	null	null	null	null	null	null
Os08circ15250	HWI-ST620_0177:8:1307:5849:104115#0/1_A_CAGCCACGCCGCCATGTTCTCCTCCTCGCCGACGTCCTCCGCGCGCGCCGACACCCTCACGGCGGCGTCGGCGCCTAGGGATCGGGCCACGGAGAGGCGG	chromosome08	27404102	27405720	plus	AG	GT	2	1	0	0	3	null	null	cds-cds	null	null	null	null	null	null	null	null
Os08circ15281	HWI-ST620_0167:6:2105:10836:165650#0/1_A_CCCATGATCAGCACCCCCGTCTCCGGCCCGACGTCGGCGCGGCGGCACGCGTGCACGCCCACGCTCAGCGGCACCGTCATCTCGTTGTGCCCCATCCCGA	chromosome08	27405495	27405878	plus	AG	GT	3	0	0	0	3	null	hAT	cds-cds	null	null	null	null	null	null	null	null
Os08circ15856	HWI-ST620_0167:6:2203:2186:146325#0/1_A_CTCCTCGGGGGGCTCCGCCGCGAACTCCTCCTCCACCGCTTCCTCCTCCTCCTCCTCCACGGAGGCCACCACCTCTCCATGCTCGCTGAACAATTGCAGC	chromosome08	27968913	27969813	minus	AC	CT	3	0	0	0	3	null	null	intron-cds OR cds-intergenic	null	null	null	null	null	null	null	null
Os08circ16521	HWI-ST620_0166:7:2306:16058:195493#0/2_A_CTTGCCAATGATTCGGATGAATTTAACAGGTACTCTCAGGCAGGTACTCCAACTGTTAAAGTGAGCTCTTCATACGATGCAAGTTCTCAGACATTTTCTC	chromosome08	28263351	28264278	minus	AC	CT	0	0	3	0	3	null	null	cds-cds OR 3utr-3utr	chromosome08	28263351	-	Os08t0562700-02	chromosome08	28264278	-	Os08t0562700-02
Os08circ02923	HWI-ST620_0171:3:1204:16141:127929#0/2_A_CTTTTTCTTTGCTTTTCTTTTTTCTACTTTACTTTCTTCTTTTGTTGCCTTCACCTCACCTCCTTCTGATCCATGTCGCCAAGAACCCATCTTGCTTAGC	chromosome08	3325556	3325982	plus	AG	GT	0	3	0	0	3	null	null	intergenic-intergenic	null	null	null	null	null	null	null	null
Os08circ03605	HWI-ST620_0166:8:2301:8471:36136#0/2_A_GCCTGCTTTTTCTTGATTTCTCGGTTTCTTAACACTTGAAACTGTGCTTGGATTATCATGGTGAGGTTTTGCTTACTAGCTCTGCAACATAATATTATTG	chromosome08	4172149	4172568	plus	AG	GT	0	2	1	0	3	null	null	intron-intron	null	null	null	null	null	null	null	null
Os08circ03616	HWI-ST620_0166:6:2205:17687:38002#0/1_A_GTTGCCTAATTATCACTGTTTCAATCTCAAGTTTAGCAATTTCATCACGCAGTGCAGCTGCCAAAGCATAGTTTTCACTGTCAACGGCCTTTTGCAAATC	chromosome08	4238967	4239230	plus	AG	GT	0	0	2	1	3	null	null	cds-cds	chromosome08	4238967	+	Os08t0172200-01	chromosome08	4239230	+	Os08t0172200-01
Os08circ00442	HWI-ST620_0167:4:1205:15286:81390#0/2_A_GTCAAGCTGAAAAGGAAGCTGAAGCTACAAGGAGCAGCTCCGCGAGGTTAGGAAGATTATCAAGGAGAAAAACGATGATCCTGGAATTTCTGAATACCTT	chromosome08	514024	517130	plus	AG	GT	3	0	0	0	3	null	Mutator	intergenic-intergenic	null	null	null	null	null	null	null	null
Os08circ04478	HWI-ST620_0171:3:1302:16111:132889#0/2_A_CAAGCCTAAAGGAGATAGCCGAGATGGTGGTGGGAGAAGAGGTGCATACACCCCTCACAGCAGGAATGATACTGGATCATTCCAGAAACAAAACAGAGGT	chromosome08	5421860	5422857	minus	AC	CT	2	1	0	0	3	null	null	cds-cds	null	null	null	null	null	null	null	null
Os08circ05061	HWI-ST620_0167:5:2303:2621:5128#0/2_A_GAGCTTGCAGAAAATGGAGGAAACAAGAAAGAGGAAGAGAGTCGATTGCGCTGGAAGTGAACCAGCTAGACATGAATCTGGGTTGCCAAATCTGTCTAGA	chromosome08	6735622	6736420	plus	AG	GT	1	2	0	0	3	null	null	cds-cds	chromosome08	6735622	+	Os08t0215300-01	chromosome08	6736420	+	Os08t0215300-01
Os08circ05252	HWI-ST620_0167:7:2202:19350:7831#0/1_A_GTCCCGGATGCGGCTGCCTCCTGCGAGACACGGTGCCAATTGTTGAGCAAGAATATGAAGCGCAAACCCAGGTCCGGGATGGAGAGGGAGGTTTCCTCGA	chromosome08	8061374	8061628	plus	AG	GT	3	0	0	0	3	null	Tc1/Mariner	cds-cds	null	null	null	null	null	null	null	null
Os08circ05412	HWI-ST620_0177:6:2304:1356:63977#0/2_A_TCGGGGTAGGAACTGTGTCAGTGTTGCTAGAGCTCCCATCGGTATCAAGAAGATCACCGAGACGGTCACCCAAAGTTATCTCTACAATGGTCGCATCCGG	chromosome08	8670104	8670229	minus	AC	CT	0	0	3	0	3	null	null	5utr-5utr	chromosome08	8670104	-	Os08t0242700-01	null	null	null	null
Os08circ00113	HWI-ST620_0171:3:2203:7884:96856#0/1_A_TGAGGAAGGCGAGGAGCCAGTGGAGCGCGTAGAGGGAGATGGTGGCGATGCCGATCCAGGAGTGGAGGGAGTAGAGTAATAATAAAGAAAAGATGATGAA	chromosome08	95099	95495	plus	AG	GT	1	2	0	0	3	null	null	intergenic-intergenic	null	null	null	null	null	null	null	null
Os09circ03793	HWI-ST620_0166:8:2106:4199:72502#0/2_A_CTCCGTCCACTTCCGGTGCGTCGACGAGAAGATGCGGATGGCCGTGCGCAGCGTGGCGAAGCACTTCCCGACGGCGATCGTGAGCGGGCGGTGCCGCGAC	chromosome09	12909532	12909864	plus	AG	GT	0	0	3	0	3	null	null	cds-cds	chromosome09	12909532	+	Os09t0369400-01	chromosome09	12909864	+	Os09t0369400-01
Os09circ05555	HWI-ST620_0167:4:2306:7204:191200#0/2_A_GTCTGTGATGTTGATTCGGGTTCTTGGATAATATTCATTGTTCTTGGTTGTGAAAAAAAAAAAAAAATGGTGGAGTCAGACTTCTCGTTGTTCGTGGTTG	chromosome09	16418165	16418274	plus	AG	GT	2	0	1	0	3	null	null	intergenic-intergenic	null	null	null	null	null	null	null	null
Os09circ07312	HWI-ST620_0167:6:1205:13969:100575#0/2_A_GTTTCATTCCCCATATATACATGGCAGGAGAAATCAAGAACAGTTGTGGTTTCCACTAAGAGTCCAAAGGCAGACAAACAGTATGTATGGGAAGCTATGG	chromosome09	18859622	18860001	minus	AC	CT	3	0	0	0	3	null	null	cds-cds	null	null	null	null	chromosome09	18860001	-	Os09t0474300-01
Os09circ07348	HWI-ST620_0167:7:1302:6484:5238#0/2_A_CAGGAGATTGCTGAGAAAGAGGACAAGGAGGAGGCGGCCGGCGAGCAGTTCGAGTACCAGGCTGAGGTCAGCCGATTGCTGGATTTGATTGTCCACAGCC	chromosome09	18858441	18861073	minus	AC	CT	2	1	0	0	3	null	null	cds-cds	chromosome09	18858441	-	Os09t0474300-01	null	null	null	null
Os09circ08621	HWI-ST620_0167:5:2106:4821:88853#0/2_A_CTGTCATTAATCGTCATCTTATGTTGATGATGCCGGTATTTCGTACCGTTATGGTTTTTTATTTCTGGAAGGCAACCAGCAAAGATTGCGACCACATATG	chromosome09	20586779	20587918	minus	AC	CT	2	1	0	0	3	null	Tc1/Mariner || PIF/Harbinger	intergenic-intergenic	null	null	null	null	null	null	null	null
Os09circ08727	HWI-ST620_0171:7:2202:18978:87961#0/1_A_TTTGCATATGCGCTCATCAATCACGAACGAAGTGAGTAGTACTGAACACATAAAAGCGTTGTACCAAGATAACTTAAATAAATGACATATTTAACAAATA	chromosome09	20727112	20727522	plus	AG	GT	0	3	0	0	3	null	null	intron-intron	null	null	null	null	null	null	null	null
Os09circ09629	HWI-ST620_0167:6:1301:2802:59503#0/1_A_CCCTCTTGTCTTGAGAGGGAGTTTTGGAATCTCCATTTTTGTTTTCAAGATCTATATGTGTTGCCGAGGTGGATGTTTTGCTATTCCAAATGGGAGGAGC	chromosome09	21770171	21770389	plus	AG	GT	3	0	0	0	3	null	null	intergenic-intergenic	null	null	null	null	null	null	null	null
Os09circ09836	HWI-ST620_0167:6:1102:20088:99971#0/1_A_GCCCTGTCAGATGCAAATCACCCTTACCCACCATCGCTGTAGCCTCGACAAATTGTACCTTATCCTTAACACCGCCAACTGGCAACACAAGGCCCCTAAG	chromosome09	21830977	21831540	minus	AC	CT	3	0	0	0	3	null	null	cds-cds	chromosome09	21830977	-	Os09t0533400-01	null	null	null	null
Os09circ10122	HWI-ST620_0167:4:2307:11517:54039#0/1_A_GTTGGAGAAGGTGTAGTTGTTGCCGGAGATGCACTGCACTCGTTGAATCATTGAATCTTGATGCAATTGCGCGAATCTGTACCATTTTTCTCATAGCTGT	chromosome09	21995269	21998003	minus	AC	CT	3	0	0	0	3	null	null	cds-3utr	null	null	null	null	null	null	null	null
Os09circ10243	HWI-ST620_0171:7:2302:7384:107533#0/2_A_CACCGAGACACTGAATACATTGCCTGACAGGGAACTGGCTTCAGGCATAGCTGAGGTGGCGTTATTGGGGACATGTGCGGTTTTGCAGCTGCTGCGTTCC	chromosome09	22112250	22112573	minus	AC	CT	1	2	0	0	3	null	null	cds-cds	null	null	null	null	null	null	null	null
Os09circ10583	HWI-ST620_0171:7:2206:11457:66678#0/1_A_CCGTGCTTTTCATACCTTTTTACTCCTCGACTTCTTATAAGCTTCCCATTCTCGCCTAACCATCCAGTTCCTTTTCCTCTTCCCCGCATGTAGGTTATCA	chromosome09	22716951	22717253	plus	AG	GT	1	2	0	0	3	null	null	cds-3utr	null	null	null	null	null	null	null	null
Os09circ11536	HWI-ST620_0166:6:1102:20614:36583#0/1_A_CTCCTTCTCCTTTTCATCTGCAAACTTATATAGAACTTTGCCACCCACGTTGCCAATTCATCAGCACCATCCATTTGAATAACCCCATCATCATACATGA	chromosome09	23638187	23639410	plus	AG	GT	0	0	3	0	3	null	null	intergenic-intergenic	null	null	null	null	null	null	null	null
Os09circ01076	HWI-ST620_0167:5:1306:5732:195125#0/2_A_GATTGCTAATGATGATGCTCCTGACAATCATGCAAAAGCAAGTGCTGCATCCAGTTGGGTTACAAAAGAATTCATAGCCCAGATCCACACAGTGTCAAAA	chromosome09	4214465	4216217	minus	AC	CT	1	0	1	1	3	null	null	intergenic-intergenic	null	null	null	null	null	null	null	null
Os09circ02040	HWI-ST620_0177:7:1106:4765:153224#0/1_A_GGGAAGAGAACAAAAAGGCAGCACTCCAAGTTTTGAAGATTGTCAATATCCAGTCCAGCATAAATTGAGAAGAATATGAAGCCCACATGAGACCAGCTAT	chromosome09	6995226	6995898	minus	AC	CT	0	0	2	1	3	null	null	cds-cds	chromosome09	6995226	-	Os09t0286400-01	null	null	null	null
Os09circ02046	HWI-ST620_0171:6:1203:11480:67987#0/1_A_TTGAAATATTAGCAAGCCCACCGACAACTAGACCTGGAATATTGATAACACAGTGACAGGATCAGTTGCAGATATAAGAGCACCGAACATGAGGCACTCA	chromosome09	6998709	6999481	minus	AC	CT	0	0	0	3	3	PIF/Harbinger	null	cds-cds	chromosome09	6998709	-	Os09t0286400-01	chromosome09	6999481	-	Os09t0286400-01
Os10circ03909	HWI-ST620_0177:6:1308:15162:22580#0/2_A_TGATCATCCTGCCAGCTGGGATTTATCATCGGTTCATCGTCGACAGCAACAACTATATCAAGAGATCGGAGTGTTGTATTGGCACTTGGATCCTAAGAAG	chromosome10	15255262	15255687	minus	AC	CT	0	0	3	0	3	null	null	cds-cds	chromosome10	15255262	-	Os10t0419500-01	chromosome10	15255687	-	Os10t0419500-01
Os10circ04477	HWI-ST620_0173:6:2307:5982:89013#0/1_A_CTGGGTGCTCCACTGGATATTGGACAGTCTCCTGCAGCTCCCTCTTGACATTCTCCAGCCCACCAATGTCCTTCTCGATGTTCTCTCTAATCGCATATTT	chromosome10	16411318	16412177	plus	AG	GT	2	1	0	0	3	null	null	intergenic-cds	null	null	null	null	chromosome10	16412177	+	Os10t0442600-01
Os10circ00663	HWI-ST620_0171:2:2104:18093:64529#0/2_A_CCCTATATCTTGGATTCTATCATCCTGACCACTGCAGTTTATAACACCAAGTGCCGACCCCAGATGCTTGGATTCTTAAGTAACGAAGGTGGATAAGTTT	chromosome10	1642997	1643543	minus	AC	CT	0	0	2	1	3	null	null	5utr-5utr OR 3utr-3utr	chromosome10	1642997	-	Os10t0125600-01	chromosome10	1643543	-	Os10t0125600-01
Os10circ04735	HWI-ST620_0167:4:2307:19899:171178#0/2_A_GAGGCGGACCAGGACGGACGCCGACCAGCTCTACCAGCCGTTCCATCCGCCGCCGTCGCCGCTCCCCGACAAGTACAAGGACCTCGACCTCGGCCAGCGC	chromosome10	16594600	16595430	plus	AG	GT	2	1	0	0	3	null	null	intergenic-intergenic	null	null	null	null	null	null	null	null
Os10circ04914	HWI-ST620_0166:8:1201:2947:178557#0/2_A_CTTTTCGACGGCGAGAAGGACAAGGACGACGAGGCGATCGGCAAGCGGCGGCGGTGGAAGGTGGTGCTGGGATGCGTGGCGTTCACGATCTTCTGGGTGC	chromosome10	16732846	16733917	plus	AG	GT	1	1	1	0	3	null	Tc1/Mariner	5utr-cds	null	null	null	null	null	null	null	null
Os10circ05246	HWI-ST620_0167:5:2305:15021:172893#0/2_A_TGGGAAAGAGAGATAAAGAATAAGATGCCACGCAAGTGGTCACAAGCATGGGAGGATGCTGTTGAACAAACGGAAAATCAAGCCGGAGATGAAACTAAAG	chromosome10	17542650	17543334	plus	AG	GT	3	0	0	0	3	null	null	intergenic-cds	null	null	null	null	null	null	null	null
Os10circ06483	HWI-ST620_0167:5:1105:17326:14936#0/2_A_TAGTTGAAGAAAACATTTCAACAGCCTTGAAGGTACTGAAGTTGAGACTATTATAAAGTTTAAAAAGGCCCTTGGGTTGAATGATATAGATGCTGCAAAT	chromosome10	19186642	19189480	plus	AG	GT	3	0	0	0	3	null	null	intergenic-intergenic	null	null	null	null	null	null	null	null
Os10circ06685	HWI-ST620_0173:6:1204:17509:154900#0/1_A_CGGAGAGCGCGGAGGGGAGGAAGGAGGTGGTTGACGCCGACGCTCATCTCGAAGCCGTCGGCGGTGAAGCTCGGCTGCTTGGCGGTGGGCTGGTACACGG	chromosome10	19397557	19399454	minus	AC	CT	3	0	0	0	3	Mutator	null	intergenic-intergenic	null	null	null	null	null	null	null	null
Os10circ07386	HWI-ST620_0166:6:1207:19638:13911#0/2_A_CACAACTGCATCCATCCCCTTTCGAGAGGTCCTCCTCCTTCCGCGTCCCCCGCTCGCTGTTTCATCCGCTTCTTCCTCCCTCCATCTTCGCTTGTGAGCT	chromosome10	20052345	20053771	plus	AG	GT	2	0	1	0	3	null	null	5utr-cds	null	null	null	null	null	null	null	null
Os10circ07390	HWI-ST620_0177:8:1302:4098:68263#0/1_A_GGTTACAGTTTTTGTCGCAGATGTGCGTGGTCCCATAAATTAGAACTGATACTACATAGACATTTATTCGGTGCATCCAAGGAGAGTCTCATATCCCTTC	chromosome10	20053562	20054015	minus	AC	CT	1	2	0	0	3	null	null	intergenic-intergenic	null	null	null	null	null	null	null	null
Os10circ07636	HWI-ST620_0171:7:1202:6149:56362#0/2_A_CCGCCGTCACCCTCAACATCCTCATCGCCGGCTTGGAGCGGAGTTCGTGGGGACGTTCATCCTCATCTTCTTCGCGACGGCGGCGCCGATCGTGAACCAG	chromosome10	20276556	20277043	minus	AC	CT	0	2	0	1	3	Mutator || hAT	PIF/Harbinger	intergenic-intergenic	null	null	null	null	null	null	null	null
Os10circ08188	HWI-ST620_0166:7:2106:6207:35964#0/2_A_TTATTGTTAATGCAAATGGAACAGAAACAGGTCAGATTATTGTGACATCAATTGGAGGTCAAAATGGGAAGCCAAAGCAGAGCTGTAGCAATGTGGAACA	chromosome10	20696837	20697799	minus	AC	CT	0	0	3	0	3	null	null	intron-cds	chromosome10	20696837	-	Os10t0521700-01	null	null	null	null
Os10circ08278	HWI-ST620_0167:5:1101:14855:162248#0/1_A_CCGTTGATGTGCTGCGCCGCCGCCTTGAGGACCACCATCATGGAGCCGCCCCGGTGGGCGACCACCATGCTGGTCTTGGCGTCGGCGTCCATGGGCAGCG	chromosome10	20843109	20843816	minus	AC	CT	3	0	0	0	3	null	null	cds-cds	null	null	null	null	null	null	null	null
Os10circ08297	HWI-ST620_0167:5:1104:11915:4255#0/2_A_TGATGGTGGTCCTCAAGGTCCTCTCCGCCTTCTCCTCCCTCCACCTCCACAAGCACCTCCTCCTCCCCAAGACCAACCCCTCCTCCTCCTACTCGCGGCC	chromosome10	20843098	20844024	plus	AG	GT	3	0	0	0	3	null	PIF/Harbinger	intergenic-intergenic	null	null	null	null	null	null	null	null
Os10circ10261	HWI-ST620_0166:7:2201:11437:37744#0/1_A_TCCCTTGCTAAAGGATTAAGAACCTCTACCACCATGGTAAGGGCATTGGATTCTGCCCTCATTAACTGAGCCAAGATGAAGAGGGCAAGCTCTGTGAGCA	chromosome10	22981778	22982485	minus	AC	CT	0	0	3	0	3	null	null	cds-cds	chromosome10	22981778	-	Os10t0567400-02	chromosome10	22982485	-	Os10t0567400-02
Os10circ10432	HWI-ST620_0171:5:2302:5569:81809#0/2_A_CGCATGTGGACATGTTGGGCTTTTGTTCAAGGTGGTCAAGCACTGAAGCTGCTGGATGTCAGTAGGTATTGAAAAGTTCATTAATGACTGCTAATTGTTA	chromosome10	23195235	23195867	minus	AC	CT	0	2	0	1	3	null	null	intergenic-intergenic	null	null	null	null	null	null	null	null
Os10circ10483	HWI-ST620_0166:7:2104:5834:17847#0/2_A_GTTGTGGTATAGATGCTTGGAGGCGATTCTGATCCCACAATGCTGTCTACAATAAGGGAATCAGTGGAGGGGCGGGGCAGTGGACGACGGGTGGAGGGGC	chromosome10	23203142	23203450	minus	AC	CT	0	0	3	0	3	null	null	cds-intron	null	null	null	null	chromosome10	23203450	-	Os10t0572500-01
Os10circ11054	HWI-ST620_0173:6:2205:4735:189977#0/1_A_GGTGACGATGACGTTGGTGAGGAGGCAGAAGGTGAGGAAGACGAGGTGGGCGGGGGTGCAGAGGGAGGAGACGGCCACCAGCTCGGCGGAGCCGGCGGAT	chromosome10	23654721	23655565	minus	AC	CT	2	1	0	0	3	null	null	intergenic-intergenic	null	null	null	null	null	null	null	null
Os10circ01020	HWI-ST620_0167:4:2107:12627:134835#0/1_A_TGCAGCAGCGCTGTTCTTGGAGCTGCTGGAGCCGACGGAGTACCAGCTTGAGCCAGCTCCTCACTTTCTGGCACGTGCAATGCAATGAAACAGAGCAGTA	chromosome10	2886716	2887659	minus	AC	CT	2	1	0	0	3	Mutator	null	cds-cds	null	null	null	null	null	null	null	null
Os10circ01579	HWI-ST620_0177:8:2204:21261:43641#0/1_A_CCGAGCATCTCGAAGAAGGTGTGGTGGTAGGTGTCCCACAGGACAAATGCATCCTGTCCACTAAGTACTGTTCCTCCACTCTCTTTAACAGCATCTGCCG	chromosome10	5442795	5448098	minus	AC	CT	1	2	0	0	3	null	null	intergenic-intergenic	null	null	null	null	null	null	null	null
Os11circ04433	HWI-ST620_0171:3:2206:10305:80830#0/2_A_CCATTCCCAATATATTTTCCAGGGACCTCGTTTTACCGATGCATGCAGGGTAGGAGAAATGTATGGACCTATATTCAAAACTAACATAGGAGGCCAGCAC	chromosome11	10518823	10519533	plus	AG	GT	0	3	0	0	3	null	null	cds-cds	chromosome11	10518823	+	Os11t0289700-01	null	null	null	null
Os11circ04502	HWI-ST620_0166:6:1108:1624:112464#0/1_A_TGTAGACACCTAGGGTTCTAATTAACGGGCGGACGGGTGCAGCCAGCCCTTTGGGCAACTATTTTAGATTCACCAGCTCCATCACTCTGATTCCACGACA	chromosome11	10745695	10745942	plus	AG	GT	1	0	1	1	3	Mutator (self-complementation)	Mutator (self-complementation)	intergenic-intergenic	null	null	null	null	null	null	null	null
Os11circ05598	HWI-ST620_0171:3:2206:19095:34389#0/1_A_GTTGGGATGTTAATCTCTCATGGTGGAGGTCAGGTTAGGAACTTGGGATGTGGAGGGGGCTTTGGGGTTTTTTTTCTTCTTCTTTTTCTTTGCCTTTGCC	chromosome11	18854532	18855340	plus	AG	GT	0	3	0	0	3	Tc1/Mariner	null	5utr-5utr	null	null	null	null	chromosome11	18855340	+	Os11t0477400-02
Os11circ06805	HWI-ST620_0167:4:2205:4023:153896#0/2_A_GCTTGTTAGGTACCTGGGCGTGAGTAATGGTAACATGCAGGAAGGTTCCCTTGATTTGGATCTTCCGGTGGAGTTCGGCGGTGGGCATAGGAGATTTGGG	chromosome11	22258395	22259368	plus	AG	GT	3	0	0	0	3	null	null	intergenic-intergenic	null	null	null	null	null	null	null	null
Os11circ07156	HWI-ST620_0171:2:2206:16243:116421#0/1_A_GAATTTCACAGTAGCTAACAGGCTCTACGTTCTTCAGCCTTCTGGATAGCTTTGCCGCTCATTTCTGCATCCTCTTGATCCTCCTTAGCAACTGGAGCCT	chromosome11	23378635	23380442	minus	AC	CT	0	0	0	3	3	null	null	cds-cds	null	null	null	null	chromosome11	23380442	-	Os11t0568300-01
Os11circ07751	HWI-ST620_0171:5:1202:8810:13552#0/2_A_TCCGGCCCCAAATCCTTTTCTTCGAGATGTTGCTAAGCTGAATAATGGCTCTCCTGGAAAAGAGTTGCATGATATGGATGATATATATGAGGAATATGTT	chromosome11	24900879	24903630	plus	AG	GT	0	0	0	3	3	null	null	intergenic-intergenic	null	null	null	null	null	null	null	null
Os11circ07858	HWI-ST620_0167:7:2102:18065:174088#0/1_A_GGAGGGGATTTCGGGGCGTTTTTTGGGCGTGTGGCGGGCGGGTGGGGGAGGAGGCGATGCGGTTGGGTTGTCCTTCCCCGGGATGGGCACGCAGCCGGGG	chromosome11	25126899	25127585	plus	AG	GT	2	1	0	0	3	null	hAT	intergenic-intergenic	null	null	null	null	null	null	null	null
Os11circ08176	HWI-ST620_0167:4:2103:10052:80009#0/2_A_GGTTTTGGTAAGGTGTACAAAGGAGAGCTTTCAGGTGTCTCACTACAGTTATATAGGTAACCATTTGAATTGTGGCCAACACTTGATTTCTTGTGAAGGA	chromosome11	25632791	25633440	minus	AC	CT	1	2	0	0	3	null	null	cds-cds	null	null	null	null	null	null	null	null
Os11circ08649	HWI-ST620_0167:6:1303:15201:83026#0/2_A_GCAAAGACATCTTTGTAGCAAAGGATGAAAAGACATTGAAATGGGGCCTCCAAAGGTTGAAGGACTTCCCCAGACCATTTTGGCTAGCCCTTTTTGTTGA	chromosome11	27400822	27402714	minus	AC	CT	2	1	0	0	3	null	null	cds-cds	chromosome11	27400822	-	Os11t0637800-01	null	null	null	null
Os11circ09029	HWI-ST620_0171:3:2202:16075:49811#0/1_A_GGATGATGCCGCAGAAGCGGTTGGTGTTGATGTGGAAGAAGGCGAGGTGGGCAGCGTGCCGACGAGGACGTTGCCGCTGATGTCGATGACGTAGGTGTTC	chromosome11	28520134	28520612	plus	AG	GT	0	3	0	0	3	null	null	intergenic-intergenic	null	null	null	null	null	null	null	null
Os11circ09150	HWI-ST620_0171:4:2204:4382:113738#0/1_A_TCATAGGGCCAGCTTTGTGTTCCTCTGAGATGACTTCAATTAACTCGGCCATTGCTAGCCTTTCAACCTCATCAATGAATATAACGCTTGGAGCTATTTT	chromosome11	28754133	28757103	minus	AC	CT	1	2	0	0	3	null	Tc1/Mariner	intergenic-cds	chromosome11	28754133	-	Os11t0661400-01	null	null	null	null
Os11circ09394	HWI-ST620_0171:7:1201:9718:111205#0/1_A_CCGATGCGGTTGATTTACTCGCCGTCGAGGTAGATGCCGCTGATTTCCCGTCTGGTGGCGGGAGGATCCTTCAATTGCCGTAGATGAAGTTGTGACTCAC	chromosome11	29856112	29856439	minus	AC	CT	0	3	0	0	3	PIF/Harbinger	null	cds-3utr	null	null	null	null	chromosome11	29856439	-	Os11t0683700-02
Os11circ09951	HWI-ST620_0167:7:2301:11701:37976#0/2_A_CGCTGGAGAACTACGCCTACAACATGCGCAACACCATCAAGGATGAGAAGATCACCATTACCAACGACAAGGGCAGGCTTAGCAAGGAGGAGATTGAGAA	chromosome11	31007352	31007522	minus	AC	CT	2	1	0	0	3	null	null	intergenic-intergenic	null	null	null	null	null	null	null	null
Os11circ10170	HWI-ST620_0177:7:1201:6458:60095#0/1_A_GGGCTGCTCGAACTCCGGTGGGCCCTCCTCCTCCTATGCAGGCCGCCTACGATGCATCGATGGGATGCGAATAGCTAGAGATCTTTTATTCAGCTGGATG	chromosome11	31133457	31134061	minus	AC	CT	2	0	1	0	3	Mutator	null	ncRNA-ncRNA	chromosome11	31133457	-	Os11t0707000-01	null	null	null	null
Os11circ11504	HWI-ST620_0166:8:1304:4019:126622#0/1_A_CGAGCTTGTCCATGAAAGCAGGGGCGATGTAGAAGCCTCCCATGGTGTTGTCGAAGTCGTACGTTCTGGATGAGTGGGACCTTGATGTTGGGGAGGGTCA	chromosome11	31134893	31135016	plus	AG	GT	0	0	3	0	3	null	null	intergenic-intergenic	null	null	null	null	null	null	null	null
Os11circ11982	HWI-ST620_0167:4:1103:4785:12546#0/1_A_TTTGAATCACCACCTCAAGGCTCCTTTGCTCTCTCCGTATTTCCATGCACTGCACTGCACTCTCACCAGCTCTTAGTTCTCCTTCCCCTGCCGCTGGTCA	chromosome11	31173123	31173709	minus	AC	CT	2	1	0	0	3	null	null	3utr-3utr	null	null	null	null	chromosome11	31173709	-	Os11t0708000-01
Os11circ01276	HWI-ST620_0177:8:2203:4449:162128#0/1_A_GCCTTCTTCTTGCTCTTGCACCAGTTCTTGTAGAACCTTCTTATTCATCTCAGTGCGGTGGTGGTACCCATTCTGACCAGCGCGAGCAACAGTATAGGAA	chromosome11	3277605	3278228	plus	AG	GT	0	3	0	0	3	null	null	cds-cds	null	null	null	null	null	null	null	null
Os11circ03614	HWI-ST620_0173:6:2105:6800:116495#0/1_A_GTGGGAGATGCAGCAGAAGGGGTGGTGCTGTGTTCAGAAAGGGGGAGACTGTGGTGCTTGGAGAGGTTCTCGACGGGGCCCTCGCCGGTGACGTAGGCCT	chromosome11	7660583	7662737	minus	AC	CT	3	0	0	0	3	null	null	5utr-intergenic	null	null	null	null	null	null	null	null
Os12circ03963	HWI-ST620_0167:6:2201:4250:168999#0/2_A_TCTACCGTGAGAACCACAGATCCCCCGGATACTACGATGGCAGGGTCAGGTGCATGCAGGTGTGGCCGATTGAGGGCATCAAGAAGTTCGAGACCCTCTC	chromosome12	10088462	10088765	minus	AC	CT	3	0	0	0	3	null	null	cds-cds	null	null	null	null	null	null	null	null
Os12circ04002	HWI-ST620_0167:6:1107:11776:12180#0/2_A_CGAGTACCTGCTCCGTTCCAAGTGGGGGAGAGCGTGTTGTGCTGCAGAGATGGCCCCCTCAGTGATGGCGTCGTCGGCCACCACCGTCGCTCCCTTCCAG	chromosome12	10088539	10088920	minus	AC	CT	3	0	0	0	3	null	null	5utr-cds	null	null	null	null	null	null	null	null
Os12circ04456	HWI-ST620_0171:4:2204:9090:72680#0/1_A_GTCTCGAGGGAGTCAAACTTGGGACCAATCAACTACTTCATCAGCAGTTCCATGTATAATGAGCACAGGGCAGGTGACCTGAGGGATTTTATCGATATTC	chromosome12	10943917	10949894	minus	AC	CT	0	3	0	0	3	null	Tc1/Mariner	5utr-cds	null	null	null	null	null	null	null	null
Os12circ05119	HWI-ST620_0177:7:2202:6522:60014#0/1_A_GCTGAGTATACAAGGGCCCCCAGACGACTCTGGTCATCAAAAGATTCTGACAATATCCCGCGAACAACCTCTAACATTACTTTTTCAGGGAATATAGAAA	chromosome12	11742132	11747791	minus	AC	CT	0	0	1	2	3	null	null	cds-cds	chromosome12	11742132	-	Os12t0297500-01	chromosome12	11747791	-	Os12t0297500-01
Os12circ06023	HWI-ST620_0167:4:1205:6933:7883#0/2_A_CGGCTGACTTGGTTGAGAAAGTTAATGGGTTACTTGATGAGGTTCTCCAAATTTTGGAACTCTACCGAAGGATTTATGAAGAATTTTTAGCAGTTCCAGT	chromosome12	15054838	15056948	minus	AC	CT	2	1	0	0	3	null	null	cds-cds	null	null	null	null	chromosome12	15056948	-	Os12t0443700-02
Os12circ07891	HWI-ST620_0166:6:1202:3743:184298#0/2_A_GTCCTCTTCATCTCCTTCCTCCTTGTGCGACGGTTGCTGACAGTAGCAGTGATAAGCACCATCACACCTTTTACAGAACATTAACTTGTTGGGATCACCA	chromosome12	20958909	20960010	minus	AC	CT	1	0	2	0	3	null	null	cds-cds	chromosome12	20958909	-	Os12t0527800-01	chromosome12	20960010	-	Os12t0527800-01
Os12circ08046	HWI-ST620_0166:6:2307:7331:59257#0/1_A_CCATTGAATCATTTGGGTTTACCTTCCCTGAACTACATCGCTTTTGATCAATGGTGGAACCTATAGGTTGTACTTTGTTGGCAAGTACATTGTCCAACTC	chromosome12	21481480	21481902	plus	AG	GT	0	0	3	0	3	null	null	5utr-cds	null	null	null	null	chromosome12	21481902	+	Os12t0536200-01
Os12circ10535	HWI-ST620_0171:4:2103:12490:80026#0/1_A_GAGGAGAGGAGGCACTTGGCGCTCCAGAGCGGGTCGTTCAGGTCGGCGCCGTTGGCCTCCCGCCTTCGCTTATGAAAATCTTTCAGGAATTCTAACGTGC	chromosome12	25790433	25792222	plus	AG	GT	0	3	0	0	3	null	null	cds-cds	null	null	null	null	null	null	null	null
Os12circ10559	HWI-ST620_0177:8:1104:19035:192451#0/1_A_GGAGGAGAGGAGGCACTTGGCGCTCCAGAGCGGGTCGTTCAGGTTCAGGTACCAGCATGAGTAGCACACCTGAAGGAGCGTGCAACTCTATGCCACAGGT	chromosome12	25790448	25793338	minus	AC	CT	0	3	0	0	3	null	null	intergenic-intergenic	null	null	null	null	null	null	null	null
Os12circ00529	HWI-ST620_0166:8:1203:2220:48557#0/2_A_GTTGTAACACATGTAATTGTTGAAGATGATGGACCTAAAAGAAGACATCTGATGATGCAATTCCACAGCCAGTTGTTCTGATAGATCAAGACTCAGACCG	chromosome12	2596055	2597154	minus	AC	CT	0	0	3	0	3	null	null	cds-cds	chromosome12	2596055	-	Os12t0152700-01	chromosome12	2597154	-	Os12t0152700-01
Os12circ11787	HWI-ST620_0173:6:1108:14592:54562#0/1_A_CGCCATGGGAAGGCGCCGGTGAAGCTGTTCTGCGACACGTTGAGCCTCTGCAGCCTCGTCAGCGGCGAGAGGTTCTCGTCGCGGACACCGTCGATCACCT	chromosome12	27257852	27259489	minus	AC	CT	3	0	0	0	3	null	null	intergenic-intergenic	null	null	null	null	null	null	null	null
Os12circ12359	HWI-ST620_0166:8:2102:8515:197624#0/2_A_CTGACAAGTACAATTCTGTCAAGCAACGAAGGCTGGAATATGAACAAAAACGAGATATGCAGGCACCAATTATTAAATTAAAGGAGACACGTGAATCTCT	chromosome12	27668856	27670206	minus	AC	CT	1	0	2	0	3	null	null	3utr-3utr	chromosome12	27668856	-	Os12t0641500-02	chromosome12	27670206	-	Os12t0641500-02
Os12circ01194	HWI-ST620_0171:2:1203:12116:147701#0/1_A_GGACGGTCGGGATGCCCGGGATCCTCGCTGGGACGGTCGAGGACGCCGCCGTCGCGCGGGACGCGGTGGCTGGGGCGGGCGCGGGCGTGCGCGGCGGACG	chromosome12	3504667	3505171	minus	AC	CT	0	0	0	3	3	Tc1/Mariner	null	cds-cds	chromosome12	3504667	-	Os12t0169000-00	chromosome12	3505171	-	Os12t0169000-00
Os12circ01335	HWI-ST620_0167:4:1104:9025:83140#0/1_A_GCCGGTTGGGAAGGGGAGTGAGGTGTCCGAGGATCTGCTTCTTCACCTTCTCCTGTGGTGAGGCAAGGGTCTGGCAGTGCTCTCTATCACAACGAAACAA	chromosome12	3630534	3631596	minus	AC	CT	2	0	1	0	3	null	Mutator || PIF/Harbinger	intergenic-cds	chromosome12	3630534	-	Os12t0171300-00	null	null	null	null
Os12circ01415	HWI-ST620_0166:8:1105:12989:56888#0/2_A_GATGATTTCTGGGAAATGGTCTATGAATATCAATGTCCTGTTATTGTTATGCTCACACAATTCGACAGTCTTAAGTTGATACTACCAGGGTAAGGCTAAA	chromosome12	3794297	3794612	minus	AC	CT	0	0	1	2	3	null	null	cds-cds	chromosome12	3794297	-	Os12t0174800-01	chromosome12	3794612	-	Os12t0174800-01
Os12circ01621	HWI-ST620_0171:2:2206:12489:149218#0/1_A_CACGTGTGCTGTCTACATACAGACTTTCCCATGGGAAAAATAAATTTATCTCAACATTGGGCACCAAAACCAAAAGTGAATTCCACTTGAAGTGAATTAC	chromosome12	4208665	4210104	plus	AG	GT	0	1	0	2	3	null	null	intron-intron	null	null	null	null	null	null	null	null
Os12circ01918	HWI-ST620_0171:4:1204:15217:186231#0/1_A_GGCTGATGAAGGAGTAGCCGAAGGAGGTCGCGTTGATGAACTTGGCGTCCGGCCACTGGCACGCCACGTAGCTCTCCAGCCTCGCGAAGATCGGCTGCGC	chromosome12	4882626	4883205	minus	AC	CT	0	3	0	0	3	Tc1/Mariner	null	intergenic-intergenic	null	null	null	null	null	null	null	null
Os12circ02880	HWI-ST620_0167:4:1102:14902:180093#0/2_A_GATGCTCTGATTTCAGCTGCCAAGCTATCTTATCAATACATCAGTGATGAGATAATACTATTTATTGATGAAGTCCACACTCTCATAGGAGCAGGAGCAG	chromosome12	7105635	7106104	minus	AC	CT	3	0	0	0	3	null	null	cds-cds	chromosome12	7105635	-	Os12t0230100-01	null	null	null	null
Os08circ05832	HWI-ST620_0171:5:1201:7397:52182#0/1_A_GGGCCCTTCACCTTGCTATCATTATGCCCACTAAGCTTAACCTCTCCTCTGGATAAAACCAACAATACACAATCTTAGTCCTCATCTTCATCAGAGAGGA	chromosome08	10331234	10331775	plus	AG	GT	0	0	0	2	2	null	null	cds-3utr	chromosome08	10331234	+	Os08t0270200-01	chromosome08	10331775	+	Os08t0270200-01
Os03circ23448	HWI-ST620_0171:6:2106:7358:2990#0/2_A_GGTTAGGGCAGCAGAAGGTGGTTATGAAGAAGTTGATCTTGTTTTGCCAGGCACTGGAAGGAATCTTCGAGAAATGTTTCATATCGATGCTGCAGATTAC	chromosome03	28994110	28995872	plus	AG	GT	1	0	0	1	2	null	null	5utr-cds	chromosome03	28994110	+	Os03t0701800-01	chromosome03	28995872	+	Os03t0701800-02
Os03circ00757	HWI-ST620_0219:1:1303:4986:48708#0/2_A_GGTGGTGCATTTTGAAGGGTCATGAGAAGAACCATAGAAAGTGCCTCCTGTTCAGAAGAAGGCATTTTCTTCAAAGCTAATTGTGCTGCATCTTTTAGCTGGAGCGCTTTTACACGATCCCACAGAGGGGGCAAATCAGTTAAAATACTC	chromosome03	801746	802253	plus	AG	GT	1	0	0	1	2	null	null	cds-cds	chromosome03	801746	+	Os03t0114300-01	chromosome03	802253	+	Os03t0114300-01
Os07circ07678	HWI-ST620_0177:7:2305:9782:40870#0/2_A_GTGGGAGCATTGCTGCCTGTGGTTGCAACATTACTGCAATTTAGCCCCGAAGAGGTTAGCATCAATGGTAATCAAAATCCAGGACCTGCTAAACAGGATG	chromosome07	17641667	17642905	plus	AG	GT	0	0	2	0	2	Tc1/Mariner	null	cds-cds	chromosome07	17641667	+	Os07t0472500-01	chromosome07	17642905	+	Os07t0472500-01
Os08circ05101	HWI-ST620_0166:6:1202:17188:146042#0/1_A_CGTTCTGCAAACATACATACCCCTGGCTTTCATGTCCATAGCAACAAGTTCAAGAGCACCCACACCACCTTTCTCAAGAGCACCTGATGGCTGGCCCAGT	chromosome08	7496957	7497618	plus	AG	GT	0	0	1	1	2	null	null	cds-cds	chromosome08	7496957	+	Os08t0223766-00	chromosome08	7497618	+	Os08t0223766-00
Os01circ15182	HWI-ST620_0177:6:1105:16841:31902#0/2_A_GCACTCTTGTAATGGATTTGGAAGGCACGGATGGTCGAGAGAGGGGAGAGAAATGGACGCCTGTTTTTCAACACAGCTTATTGATGGAGATGGCGTTTTC	chromosome01	23752180	23752726	plus	AG	GT	0	0	2	0	2	null	null	cds-cds	chromosome01	23752180	+	Os01t0575000-02	chromosome01	23752726	+	Os01t0575000-02
Os01circ22230	HWI-ST620_0177:6:2203:3990:178295#0/1_A_GACCCAAGGAAGTGCTGCAACAACCTCATTTGCCTTCTCTTCAAACACACTTTGAGCAGATCGGTCATTCCTTCTGACTGTTGCTGGATGCAACAAGAAC	chromosome01	31739062	31740967	plus	AG	GT	0	0	1	1	2	null	null	intergenic-cds	null	null	null	null	null	null	null	null
Os01circ28042	HWI-ST620_0166:6:1108:13971:29882#0/2_A_CTCGATCAAGAGATGGCATCAGACCCTTTGGAGAGAAAGGAGCGCCGATTCAGTGGCTTCAACCATAAATTTTTGCTGCCAATAACAGCAATAAGCTCCC	chromosome01	38680892	38681993	plus	AG	GT	0	0	1	1	2	self-complementation	self-complementation	cds-5utr-acrossGene	null	null	null	null	null	null	null	null
Os01circ32515	HWI-ST620_0166:7:1304:6514:164695#0/2_A_TCCCCGCCAAGCACTTCTCCGCCAAACGCGACATGCCTAAGTTCAAGAGAAGTGGACAACCTGACGCTGAGGAGGTTCCTGCGGGCGCGAGACCACAACG	chromosome01	42414917	42415175	plus	AG	GT	0	0	2	0	2	Tc1/Mariner	Mutator	cds-cds	chromosome01	42414917	+	Os01t0926800-01	chromosome01	42415175	+	Os01t0926800-01
Os03circ13282	HWI-ST620_0166:6:1206:1614:196510#0/1_A_CATTATCAAATTTGGCAGAGTGCACACCGACAACAGTGAACTTTCTGTGACCTTCACCTGATATTTGTGCTAAAACCTTCCCGTTGGGCCCAATCACAAC	chromosome03	11160765	11161117	plus	AG	GT	0	0	2	0	2	null	null	cds-cds	chromosome03	11160765	+	Os03t0311300-02	chromosome03	11161117	+	Os03t0311300-02
Os03circ28554	HWI-ST620_0177:6:2104:4891:159330#0/2_A_GGGACCTTCAAATACTATATCAAGATCATGACCATGAGCATGAAGATGAACAAAAGAAGCAAGAGCACACCTTTAATGAAGATGCAGAAAAAATGGTTAA	chromosome03	33456193	33457463	plus	AG	GT	0	0	2	0	2	null	null	cds-cds	chromosome03	33456193	+	Os03t0784400-01	chromosome03	33457463	+	Os03t0784400-01
Os03circ00616	HWI-ST620_0219:1:2115:5781:93349#0/2_A_TGGCTTTCTCTTGGATATCACCCACTTTCAGTCGGCTAATTAGATCATACTTCATGCTCTGCCTTAGGCGCTTGCATTCCTCCAGCTTTCTTGTTGCCAAATTCATCATCAGATTCATAATCAGGATCCATATGCGAGTCAACATGCACG	chromosome03	714606	715476	plus	AG	GT	0	0	1	1	2	null	null	intergenic-intergenic	null	null	null	null	null	null	null	null
Os04circ12096	HWI-ST620_0177:6:2305:8690:57980#0/2_A_CTGAAGGATATGCAAGGCACACGACTGGACAGGAGGCTGTACCTGACCGTGTTGAGGAACCGGTCAGGAGAACTGGACCGGTGCATGGATTTGTACCAGG	chromosome04	29956627	29956824	minus	AC	CT	0	0	2	0	2	null	null	intergenic-intergenic	null	null	null	null	null	null	null	null
Os05circ09155	HWI-ST620_0166:6:1102:12196:70911#0/1_A_CTTCTCTTCAGCACTTCGAGTCTCTCCACCAAGGCGTATATTTCTTCCGCCACCATAGGGATGATCTGATCGATGCCCATCTCAGGTTCGTCTAGGGCAG	chromosome05	18493738	18495344	plus	AG	GT	0	0	2	0	2	null	null	3utr-3utr OR 5utr-cds	null	null	null	null	null	null	null	null
Os05circ11798	HWI-ST620_0211:2:1101:16441:36622#0/2_A_GAGACGTGATAAAGCTGCATACTGCCATGGAGAAGGAGACTAGCTGCCCGAGGAACACTAGGAACATCATGCTCCACGGCGCGCTCTTGTTCTTCATGAGTAGCTGAATTCCAGTGACAAGCATCCCAAATATTCCAAGCATCGCAACGA	chromosome05	21855421	21856639	plus	AG	GT	0	0	0	2	2	null	null	5utr-cds	null	null	null	null	chromosome05	21856639	+	Os05t0444500-00
Os06circ09691	HWI-ST620_0166:6:2105:21016:141702#0/1_A_GGCCTCTGATCTTGGAAATGAATGTAATACGGCATCTTCTTTGGCCCATCCTTTTTCCATTCGTAGAAAAAGATCTGCTCCTTCATAGGGTACTGTAATT	chromosome06	16533220	16535102	plus	AG	GT	0	0	2	0	2	null	null	3utr-3utr	chromosome06	16533220	+	Os06t0470800-01	null	null	null	null
Os06circ06471	HWI-ST620_0166:7:2203:12383:73257#0/2_A_CAAAATTGAGGCAGGGGGCTAAGATAATTGGGGATCACATGAGAGCAGTTGTTTATCTCATATCAGATGGAGTCATTCCCTCAAATATTGGGAGAGGATA	chromosome06	7577268	7578188	plus	AG	GT	0	0	2	0	2	null	null	5utr-cds	chromosome06	7577268	+	Os06t0245800-01	chromosome06	7578188	+	Os06t0245800-01
Os10circ05855	HWI-ST620_0166:7:1205:5799:48419#0/1_A_GCCCTGATTCCTGGATCTAGACACTGTCGAGAAAAATTTATTATGGACCAACTGAACAACATAAGTACATGTGTGCTTCCGTCGAACAACTGTAGCAAGT	chromosome10	18283505	18284616	plus	AG	GT	0	0	2	0	2	null	null	cds-cds	chromosome10	18283505	+	Os10t0477000-01	chromosome10	18284616	+	Os10t0477000-01
Os10circ01319	HWI-ST620_0166:8:2304:3609:10519#0/1_A_CTTGAGCTTCTTCAGAATCCTTGTCAGCTATTTCCTTCATGTCTTCGTAAGAGCCTTCTGCTCACTAGATTTTCTATGAGGTTCAGCAACAGATACTCTG	chromosome10	4467637	4468199	plus	AG	GT	0	0	2	0	2	null	null	cds-cds	chromosome10	4467637	+	Os10t0167500-00	null	null	null	null
Os12circ04332	HWI-ST620_0166:6:1308:5051:190159#0/2_A_GCAGATTGCCGCAGGCTACTGCTATCTCCTGGCTCTGGCATGCCAACCAAGTGGCATAATGGTCCTGTACTTAATTCACTCTGGACTTCTGGAGAGCCAG	chromosome12	10779764	10781004	plus	AG	GT	0	0	2	0	2	null	null	5utr-cds	chromosome12	10779764	+	Os12t0284000-01	chromosome12	10781004	+	Os12t0284000-01
Os12circ07693	HWI-ST620_0166:7:1302:17408:135631#0/1_A_TCCCCCATTCCGAAAGGTAACGGGGCCGGCCCTTAGGTCCAAAGTTGTATGCCACTGCTGTTGGGTCGACGCCCGCCTCCCCCCAAACTTTACTTGCAAG	chromosome12	20776583	20777545	minus	AC	CT	0	0	2	0	2	null	null	intergenic-intergenic	null	null	null	null	null	null	null	null
Os01circ08959	HWI-ST620_0177:8:2307:2367:110374#0/1_A_CGAAGCTTCCCTTTCCTCCTCCAAAAGCCTCACCAATTGCCTCCCTCCTCCACTCCTCCCTCGCGGCGTGGCCGAGGACGCCGCCCCACTTCTCCGACAT	chromosome01	10003014	10004119	plus	AG	GT	0	2	0	0	2	null	null	5utr-cds	null	null	null	null	null	null	null	null
Os01circ09065	HWI-ST620_0171:3:1101:16268:113515#0/2_A_TGATCCGAACGCGCCACCACAACCTGTGCCGCAACCAGACCCAAACAACCCTAAACCTTTACCGCAACCATTGCCCCAGCCAAACCCAAATCCACAGCCA	chromosome01	10182458	10182883	minus	AC	CT	0	2	0	0	2	null	null	intergenic-intergenic	null	null	null	null	null	null	null	null
Os01circ09239	HWI-ST620_0171:4:2103:6232:119418#0/1_A_CAGACGATGGCTTTCCTCCCTTGCCAATTTTGCACAGTCCAAGGTCCATATCTGCATATCCATAGCTGATACAGCTCCATCGTGAAAACGTTTATTCCTC	chromosome01	10540228	10542878	plus	AG	GT	0	2	0	0	2	Mutator	null	intergenic-intergenic	null	null	null	null	null	null	null	null
Os01circ09292	HWI-ST620_0171:6:2206:21062:178678#0/1_A_GTTTGGTTGGATTGGATTGGAGAGGGGGTGGAGCATGAGCACGGCGTCCCCGCGGGAGAACCTCCCCTCGGCGAAGCTCCACGCGGCGTGCTGCAGCACG	chromosome01	10548135	10548677	plus	AG	GT	0	1	0	1	2	null	hAT	intergenic-intergenic	null	null	null	null	null	null	null	null
Os01circ09295	HWI-ST620_0167:6:2305:15115:117877#0/1_A_GGGTTGGTTGGTTGGTTTGGTTGGATTGGATTGGAGAGGTGGTGGAGGTGGAGATTTGGGGAGAGGAGAGAAGACGGGCAGCACCCGAAGCTGCCGTTGT	chromosome01	10548382	10548702	plus	AG	GT	1	1	0	0	2	null	hAT	intergenic-intergenic	null	null	null	null	null	null	null	null
Os01circ09440	HWI-ST620_0173:6:1205:19520:167011#0/1_A_GTAGCCACGGACGCGGGAGAGCGCCGTCCAGCAGCGGGCACGCCCTGGAAGACAACTCCAAATGAACCACGCCCAACAGCACGCTCTGCGATGTAACTAA	chromosome01	10870803	10872681	plus	AG	GT	1	1	0	0	2	null	null	5utr-cds OR intergenic-5utr	null	null	null	null	chromosome01	10872681	+	Os01t0296100-01
Os01circ09512	HWI-ST620_0177:8:2208:11097:8194#0/1_A_TGTATCTGATTCAGGAACACCCTCTGTCATCCGAGATAGTGGAGATAATGTGTGTGGGAGCTCGGACCTTCCCACTCTTAATTGCGGTTTTAAGATCCTC	chromosome01	11049191	11051598	minus	AC	CT	1	1	0	0	2	null	null	cds-cds	chromosome01	11049191	-	Os01t0300200-02	null	null	null	null
Os01circ09595	HWI-ST620_0167:7:1103:9501:93353#0/1_A_TTGTCGCGCGCGTGGCTCGCCGCCGCGCTCAGCTCCTCCACCAAACTCCCCTCTGTCTTCTACGACAAATAATCTTTTTAACCCAGTAACTTATAATTAA	chromosome01	11250770	11250986	minus	AC	CT	2	0	0	0	2	Mutator	null	cds-3utr	null	null	null	null	null	null	null	null
Os01circ09741	HWI-ST620_0177:7:2104:3955:114538#0/1_A_CATGGCTGGCTGTTGATGCGGATTTCTGCGTGTGATGTGGGCCTCCGGCGACCGGCCTAACGAGGGACGACGCCGCCGCCGCCGGGGTAGACAGGCCGAC	chromosome01	11251160	11251277	plus	AG	GT	0	0	2	0	2	null	null	intergenic-intergenic	null	null	null	null	null	null	null	null
Os01circ01175	HWI-ST620_0166:7:2102:20115:70556#0/1_A_GCACACCTTCAATTCCACCAGTGCTCCATGTTTTTGAATCTCTTGTATGCAGCATTCACAAATTCCATCATTGCAGAAATTGCAGTGTTAAATCTTGTTT	chromosome01	1146485	1147199	minus	AC	CT	0	0	2	0	2	PIF/Harbinger	null	cds-cds	chromosome01	1146485	-	Os01t0120300-00	chromosome01	1147199	-	Os01t0120300-00
Os01circ01176	HWI-ST620_0167:7:1307:5963:26323#0/1_A_GTCCTTCCTAGAAATCTATGCACCCCTTCAATTCCACCAGTGCTCCATGTTTTTGAATCTTCTTGCAATGCATTTGTGAAGAACTCGGAGCTGATCCAAG	chromosome01	1147022	1147199	minus	AC	CT	1	0	1	0	2	null	null	cds-cds	chromosome01	1147022	-	Os01t0120300-00	chromosome01	1147199	-	Os01t0120300-00
Os01circ01196	HWI-ST620_0166:7:2101:7161:174664#0/2_A_GCTGAACATTCTGTCTTGCATTTGCTTTATGCAAGATTTTGGCATAAGGCTGGCATTGCTATCTTACAATCAGGCTGAGGTACCGGTTAATTGGTGCCCT	chromosome01	1148178	1152451	minus	AC	CT	0	0	2	0	2	null	null	5utr-cds	chromosome01	1148178	-	Os01t0120300-00	chromosome01	1152451	-	Os01t0120300-00
Os01circ01369	HWI-ST620_0177:6:2206:15171:58638#0/2_A_CAGGATTGTCTGCCAGCAAGTGAATGTGTCAACAGGTCATGGCAAAAGCCACTCGAAAGGATTATGATGAAGTATGTGGAGCTCTGTGTAGACCTGAGGA	chromosome01	1177479	1177612	plus	AG	GT	0	0	2	0	2	null	null	intergenic-intergenic	null	null	null	null	null	null	null	null
Os01circ09927	HWI-ST620_0166:7:1203:8150:8222#0/1_A_GACATCATTGTTGACAGGGGTAGGGGCTATGTATTGGCTAGGTCCATTATCGCCACAATCCTGGCAACAGCCTTGAGTGGGAATGCTCGTCCAAGCTTTG	chromosome01	11822881	11824197	plus	AG	GT	0	0	1	1	2	null	null	cds-3utr	chromosome01	11822881	+	Os01t0310800-01	null	null	null	null
Os01circ09977	HWI-ST620_0173:6:2103:20186:185989#0/1_A_TCCTGTTCCCTGAATATCACTTATGTTGAGCCCATACTGCTTTGCTAGATGCCTAACTGCTGGTGTGGAGAGTGTGCTTGATAGTATGATCTTTATTCGC	chromosome01	11949417	11949898	plus	AG	GT	1	1	0	0	2	null	null	intergenic-intergenic	null	null	null	null	null	null	null	null
Os01circ10029	HWI-ST620_0177:7:1306:4434:79569#0/1_A_CAGATGGCATCTTAATTGATGACGATAGCAGTGGCCCAGAAAGAAAAAGGTAACTGCTGAGTGGAGGAGTGCTGTCCGCCCAATGATGTGGAGATGTCAG	chromosome01	12120469	12120952	plus	AG	GT	0	0	1	1	2	null	null	5utr-5utr	chromosome01	12120469	+	Os01t0316900-01	null	null	null	null
Os01circ10110	HWI-ST620_0166:7:1108:6987:74365#0/1_A_CTTCTGTAAGTAAAACATTTCTCTGCTTTTCATCAACCTCATGAGGAATCCCTGCTTCATGCAATTGTTCTGATAAGGTTTCACTTTGTTCAACACTAGT	chromosome01	12385388	12387324	minus	AC	CT	0	0	1	1	2	null	null	cds-intergenic	null	null	null	null	chromosome01	12387324	-	Os01t0321501-00
Os01circ10313	HWI-ST620_0167:4:2105:10858:61880#0/2_A_CTGAGAGGTGGATGGGTTGGCATGGTGGCGCACTAGTGGTGTGTGCAGTAGTGGTGATAGGGCCTAGGTGGCAATACCCACCGCACACAAAGTTACATGC	chromosome01	12762711	12763693	minus	AC	CT	2	0	0	0	2	null	null	intergenic-intergenic	null	null	null	null	null	null	null	null
Os01circ10393	HWI-ST620_0167:7:1301:6071:121710#0/1_A_GCACCCTGGTGGTTTTCATGACAGATGGCCTGCCCCTACCATAGTTATCCATCACAGATAAGGATTGTGGGTCTTCAAGATTACACCATCTATTTGGAAC	chromosome01	12847875	12848195	minus	AC	CT	2	0	0	0	2	null	null	cds-3utr	null	null	null	null	chromosome01	12848195	-	Os01t0329400-01
Os01circ10550	HWI-ST620_0177:6:1104:16796:53351#0/2_A_CCCCTCAAGATATGTTACCCCGCAATGGAAGATGATGAATGGCGCATTATTACCGGCAGTGATCCTAAGAACACAGCTGGGAGAAGACTGTTGATTGTTA	chromosome01	13014457	13015665	plus	AG	GT	0	0	1	1	2	null	null	cds-cds	chromosome01	13014457	+	Os01t0332100-01	chromosome01	13015665	+	Os01t0332100-01
Os01circ10566	HWI-ST620_0167:5:2106:10371:37228#0/2_A_GTTTTCTGACCTCTAAGATGCTATTGGAAAACCCCGAGCTGGCTTCTATTCTGACCTGCGATGAGGACCCCGAGTGCACGGAGACGCTCAACTACGACCA	chromosome01	13013617	13016400	minus	AC	CT	2	0	0	0	2	null	null	intergenic-intergenic	null	null	null	null	null	null	null	null
Os01circ10703	HWI-ST620_0171:5:1103:16038:138033#0/2_A_CGCTTGTTCAACAATTACGACTGTTCCGATGAATCCTTCCGCTCCGTTAATGGTGAGCTGAGGGAGCTTCCACCTGTTGAGTTATCCAATCTTCCTTTAA	chromosome01	13397496	13400367	minus	AC	CT	0	0	0	2	2	Mutator	null	cds-cds	chromosome01	13397496	-	Os01t0337600-02	chromosome01	13400367	-	Os01t0337600-01
Os01circ10739	HWI-ST620_0171:5:2106:15363:50742#0/2_A_TTATTGCATACCCAGACATGGTGATGTTACCTGAAGCAATTGCAATAGTTATGGCACCTACTGACACAAGAAGACACATCCAACACAGTCCTGCTTCCTG	chromosome01	13445179	13446778	plus	AG	GT	0	0	0	2	2	Tc1/Mariner	Tc1/Mariner	cds-cds	chromosome01	13445179	+	Os01t0338200-01	chromosome01	13446778	+	Os01t0338200-01
Os01circ10854	HWI-ST620_0167:7:1107:20420:133958#0/2_A_GCTCCACATTCAAGGAAACCAACGTCAAACAAGGTGATATCCATGGGCAATTTGTTGCTCTTCTGAGGCTGTTTGATTTGGGCGGTTATCCTCCAACTTC	chromosome01	14066494	14067319	minus	AC	CT	1	0	1	0	2	null	null	cds-cds	chromosome01	14066494	-	Os01t0349400-01	chromosome01	14067319	-	Os01t0349400-01
Os01circ11163	HWI-ST620_0171:8:1301:18795:148487#0/1_A_GGTGGGAGGGTGCCCATGGTGGTTAGGAATGTCTCATCAGCCTTGGCCGAAGCCAATGGCTAAAGAGAGGAGGAGCACGGCGAGGTCGGACAGGAGGCCG	chromosome01	14581849	14582332	plus	AG	GT	0	2	0	0	2	null	null	intergenic-intergenic	null	null	null	null	null	null	null	null
Os01circ11190	HWI-ST620_0167:7:1303:13260:75477#0/1_A_GTTTGCTTGCTCGGTGGTGGTGGTGGTGGGTGGTTTAAGCGTTAATGGTGGTGGTGGAGCAGCCGCGGGAGTAGGGGTTGGCCTGGCCGCCAGGGCGGCA	chromosome01	14623804	14624233	plus	AG	GT	1	1	0	0	2	null	Mutator || PIF/Harbinger	intergenic-intergenic	null	null	null	null	null	null	null	null
Os01circ11208	HWI-ST620_0166:7:2206:2870:137690#0/2_A_TTGGGCCATGCCTTCGCCACCCGTCTGGGCAATGTGTTCACCATCGGCAAGGGCAACAAGCCATGGGTGTAGAAGCACAAGGGCAGTTTTGAGACCATCC	chromosome01	14657575	14657688	plus	AG	GT	0	0	2	0	2	null	null	cds-cds	null	null	null	null	null	null	null	null
Os01circ11322	HWI-ST620_0166:8:2207:12904:96888#0/1_A_TTGCCAACCTTTGCAGTCACAAACTGCAATCCTTTGAGCGCCACGGCGGCGCTGCTCTTGGTCCTGTCCAGCCTCTTCTGCTGTGAGCCTTCCATCAGCG	chromosome01	14768214	14768898	minus	AC	CT	1	0	1	0	2	null	null	cds-cds	null	null	null	null	null	null	null	null
Os01circ11663	HWI-ST620_0171:4:2303:14198:99151#0/1_A_TGGAGGAGGAAGGGAGAGAATTTTGCGTAGCCTGTGGTGGCGTCAGCCTCCATGTCGCCGACCATTTCCCCGAGCATCATCCCGCCGACCGCGCCGCCGA	chromosome01	15392145	15393084	minus	AC	CT	0	2	0	0	2	null	null	intergenic-intergenic	null	null	null	null	null	null	null	null
Os01circ11829	HWI-ST620_0166:6:2203:17766:52620#0/2_A_CTTTCACCTGATCAACGATACCTATATCCAAACATGGGCTGGAAAAGGAAGACACATCATGGAGGATCATGTCATCAACAACAATCCTGTCCTTCACATG	chromosome01	16279785	16280414	plus	AG	GT	0	0	2	0	2	null	null	5utr-cds	chromosome01	16279785	+	Os01t0383700-01	chromosome01	16280414	+	Os01t0383700-01
Os01circ00261	HWI-ST620_0173:6:1104:4651:165425#0/1_A_GTGGCCTTGCAGAACTCTCCGCCCAGATCGTCGCACGCCTCCTCGGGGAACACCGTGGTGGGCTCGTCGTAGGATAGGTAGTTTTGATAACATTGACAGG	chromosome01	167836	168773	plus	AG	GT	2	0	0	0	2	null	null	intergenic-intergenic	null	null	null	null	null	null	null	null
Os01circ00415	HWI-ST620_0167:6:2102:9620:142803#0/1_A_CATCTTCTTCTTCTTCTTTCTTCTTCTTCTTCTTTTGCTTAATTAGCTTGGTGGTCTTGCAGAACTCTCCGCCCAGATCGTCGCACGCCTCCTCGGGGAA	chromosome01	168603	169307	plus	AG	GT	2	0	0	0	2	PIF/Harbinger	null	intergenic-intergenic	null	null	null	null	null	null	null	null
Os01circ12152	HWI-ST620_0173:6:1203:1739:28079#0/2_A_GAGATGTGCAGAAGAAGTCAGTGAGGTCACAGGAAACACAACAGTGCAGCTGGATGGTGAAACTGAAGTGTTTGGTAATGATCATGAAGAAAAGAGTAAC	chromosome01	18784281	18785764	plus	AG	GT	2	0	0	0	2	PIF/Harbinger	null	cds-intergenic	null	null	null	null	null	null	null	null
Os01circ12496	HWI-ST620_0166:7:2201:5321:162998#0/2_A_GTACAACATGAAGAAGTTCTGCCTGGAGCCGACGTTTACCTTCGACGAGATTCAGAGTAAGACGTACATGGAGGTGAAGGGAACCGGCACGGCGAACCAG	chromosome01	18980482	18980631	plus	AG	GT	0	0	2	0	2	null	null	cds-cds	null	null	null	null	null	null	null	null
Os01circ12581	HWI-ST620_0167:4:1308:9202:198068#0/1_A_CGCTCGCTCGCCTGCTCAGCTCTCAGTTGGTGGGTCATGAGCTTGGTCTTCTGGAACTCGGGTGGCGCGTTCTTGGCCACGCCCTCCGCCTTAACGGTGA	chromosome01	18980058	18980707	minus	AC	CT	2	0	0	0	2	null	null	intergenic-intergenic	null	null	null	null	null	null	null	null
Os01circ12682	HWI-ST620_0167:7:1108:12391:117804#0/1_A_GCTTGGTCTTCTGGAACTCGGGTGGCGCGTTCTTTTTGGTTAAGAGGAACGTTACGTGCTCGCCTCCCGGCAGCTGCACGGTGACGGCGGCGTAGTCGAT	chromosome01	18980669	18980860	minus	AC	CT	2	0	0	0	2	null	null	intergenic-intergenic	null	null	null	null	null	null	null	null
Os01circ12687	HWI-ST620_0171:3:2302:5469:72120#0/1_A_GTCTTACTCTGAATCTCGTCGAAGGTAAGCCTCCTCGGCACGCCCTCCGCCCTGGCGACCAGATTCTTGATGGTGAACAGGAACGGCACGCGCTCGCCTC	chromosome01	18980453	18980863	plus	AG	GT	0	1	0	1	2	null	null	cds-cds	chromosome01	18980453	+	Os01t0501800-01	null	null	null	null
Os01circ12872	HWI-ST620_0166:7:2303:19590:66766#0/1_A_GGAAGGGCCCGCCGAAGCTCTCCGGCTTGCCGGTGGCGACCAGATCAGCGTTGTCGTAGCCGGTAGAGACACCGCGGCCCTTTGGGTCGAGGAAGGACGA	chromosome01	18980858	18980977	plus	AG	GT	0	0	2	0	2	null	null	cds-cds	null	null	null	null	null	null	null	null
Os01circ13022	HWI-ST620_0167:5:1307:2608:95478#0/2_A_CGACGGGCAACATCACGTTGAGCGTCACCAAGAGCAAGCCAGAGACCGGCGAGGGGATTGGCGTGGCCAAGAACGCGCCACCCGAGTTCCAGAAGACCAA	chromosome01	18980648	18981103	plus	AG	GT	2	0	0	0	2	null	null	cds-cds	null	null	null	null	null	null	null	null
Os01circ13035	HWI-ST620_0166:8:1102:19576:4868#0/2_A_GAACGCCTCGTCGTCGACGGGCAACATCACGTTGAGCGTCACCAAGAGCAAGCCAGAGACCGGCGAGGTGATTGGCGCCGGCTACGACAACGCTGTGGCG	chromosome01	18980962	18981114	minus	AC	CT	0	0	2	0	2	null	null	intergenic-intergenic	null	null	null	null	null	null	null	null
Os01circ13057	HWI-ST620_0167:6:2303:17712:172937#0/2_A_GTCACCAAGAGCAAGCCAGAGACCGGCGAGGTGATTGGCGTCTTCGAGAGCGTGCAGCCGTCAGCTCCGACGGAACCATCAAGTTCGAGGAGAAGGACGG	chromosome01	18980747	18981132	plus	AG	GT	2	0	0	0	2	null	null	cds-cds	null	null	null	null	null	null	null	null
Os01circ01807	HWI-ST620_0167:7:2204:10874:87579#0/1_A_GACGCGAACTTGAAAAGACAATGTACACCCTATTTCTGAAACCTTTTAAAGTCCCCAGCATTAACAATGCAACCTTTGGGAGAAGAACACTACTACTTGA	chromosome01	1903802	1904085	plus	AG	GT	2	0	0	0	2	null	null	3utr-intergenic	null	null	null	null	null	null	null	null
Os01circ13309	HWI-ST620_0167:6:1105:3267:190762#0/2_A_CTACCTTCAGAGGAGAAGCTTATTCAAAATGGTAATGGCAGTGCAAGTGGTGCTGGTGGGAAGGTCACAGAGATGGGATTACAGATACGAGAGATGATGT	chromosome01	19381547	19382311	plus	AG	GT	2	0	0	0	2	null	null	cds-cds	null	null	null	null	null	null	null	null
Os01circ13422	HWI-ST620_0166:6:2206:12398:94035#0/2_A_GGGGATCTTCGGTTCGCTCATTTGCTCGGTTCCGGCCGTCAGGCAGAGTGGGAACAGCAGCGCTGTCGGCCAAGGAGCCTGAAGCGCTGCCCTTCTGCGC	chromosome01	19644549	19644666	plus	AG	GT	0	0	2	0	2	Tc1/Mariner	Mutator	intergenic-intergenic	null	null	null	null	null	null	null	null
Os01circ13680	HWI-ST620_0173:6:2105:2613:97582#0/1_A_CCTCCTCATTCATCTCCTCATCATCATCATCCTCTTCGTCCTCCTCCTCATCCATCTCCCGCTCCTCTTGCTCCTCCTTATTGTTTTCATGCTCTCCCAC	chromosome01	20484678	20486785	plus	AG	GT	2	0	0	0	2	null	null	cds-cds	null	null	null	null	chromosome01	20486785	+	Os01t0526200-01
Os01circ13858	HWI-ST620_0177:8:2107:16941:23260#0/1_A_TCCAGTCGATCGATCTTTTCAAGTCGGGAACAGCGTTCATCATCCTCAAGACGTTCTTGAACTTTTCTTGCCTTTTCTTCCTCCCTCAAGCGCTCTTTCT	chromosome01	20811378	20815957	minus	AC	CT	1	1	0	0	2	null	null	cds-intron	null	null	null	null	null	null	null	null
Os01circ01953	HWI-ST620_0167:5:2206:9004:35662#0/1_A_GCAGTGACATATTGCTGTGGGACTGGCTGTTGCTGCTGTGGTGGTGGGGGTTGCTGCTGCGGTGGCAATGTTGGTGGGGCCGCTGCCTGCGAGTAGAAGA	chromosome01	2084041	2084628	plus	AG	GT	1	1	0	0	2	null	null	intergenic-intergenic	null	null	null	null	null	null	null	null
Os01circ02119	HWI-ST620_0167:6:1301:11975:145093#0/1_A_CGCAGTTACTAGGGCGCCATAAACTCCATCTTTTAATAGCTCAAGGTTATCAAATGTTGATCTGCCAGCTAGGAACAAAATATGGTACGGCAAGCTTGAT	chromosome01	2266959	2267112	minus	AC	CT	2	0	0	0	2	null	null	cds-cds	chromosome01	2266959	-	Os01t0142100-01	chromosome01	2267112	-	Os01t0142100-01
Os01circ02136	HWI-ST620_0167:6:2203:16673:27152#0/1_A_GCCGTGGTGGTGGAGAGCGCGCGGCCTTATCTCCTCGTCGCCATTGCCGTCGCCGTCGGGCTCAGTCTCAGTCATTGCCTGGCAGACAAACCTTCGGTTC	chromosome01	2269682	2270045	minus	AC	CT	2	0	0	0	2	null	null	cds-cds	chromosome01	2269682	-	Os01t0142100-01	null	null	null	null
Os01circ14747	HWI-ST620_0173:6:1108:1831:112193#0/2_A_CTGTTCGTGCAACTGGCGAACCTCCGGAGTACGACACATGCCTAGGGGACTTGTACAGCGTTGCTTGGATGGAAGACAGCGATGTCCACAACCTGAGAAC	chromosome01	22863341	22864847	minus	AC	CT	2	0	0	0	2	null	null	intergenic-intergenic	null	null	null	null	null	null	null	null
Os01circ14806	HWI-ST620_0167:5:2307:4168:96628#0/2_A_CTAAGGATAGGGAACTCACAGAGGATACACACACAAAGTCAAGCTGTGGTGAAAGCTGGCTCCCCTGCTAGCATCCCGTCAAACATACCTCCCAACCAAA	chromosome01	23055291	23056878	plus	AG	GT	2	0	0	0	2	Mutator	null	cds-cds	null	null	null	null	chromosome01	23056878	+	Os01t0563000-04
Os01circ14850	HWI-ST620_0167:6:2105:14460:77378#0/1_A_TGTGGGGATGAGTATAGTGCTGTTGAGTATAGGAGGAATGGGAAAGATAAGCTATTGTTGGGAGAAACCAAGTGAGGTAATCCATTTTTCATGTATGAGT	chromosome01	23164941	23165390	plus	AG	GT	2	0	0	0	2	Mutator	null	intron-intron	null	null	null	null	null	null	null	null
Os01circ15004	HWI-ST620_0166:7:1104:2913:130147#0/2_A_GCGGGTTGATACTTGTGCGGCTGAGTTTGAAGCCAATACACCTTACATGTATTCCTCGTATGAGTATGAATAAACTGATGTGAGATTAAGGCGCCTGGCA	chromosome01	23526313	23526435	plus	AG	GT	0	0	2	0	2	null	null	intergenic-intergenic	null	null	null	null	null	null	null	null
Os01circ15031	HWI-ST620_0167:6:1105:15841:80851#0/2_A_CATGAGGGGCGGCCAAATGCCAGGGACATGCTTAAGAATGGTCAGATACAGGTGATGGGCATTGACTATGAGTTTTCTGGTGCATTCGCAAAGGCTCAGA	chromosome01	23527757	23528041	plus	AG	GT	2	0	0	0	2	null	null	cds-cds	null	null	null	null	null	null	null	null
Os01circ02236	HWI-ST620_0167:4:1104:13066:72372#0/2_A_GCGTGCCAAGCAGAGACGTGCTGAGGAGGAAGCATTGAGGGAGAAGCAAGAAGAAGAGAGGCGTTTGGAGAACCTGTGTTGGGGGCATGCTGCAGAACCA	chromosome01	2391793	2392933	minus	AC	CT	2	0	0	0	2	null	null	intergenic-intergenic	null	null	null	null	null	null	null	null
Os01circ02237	HWI-ST620_0177:8:2103:3557:4925#0/1_A_CACTACAGAGAAGAATAGTCTAACTTGGATTGGATGAGTTAGTATGCAGCCTAGTTTTTTCTTCAGCTTCTTCCTTATTGTTCTGCCAAGTGGATCAATA	chromosome01	2392481	2393149	minus	AC	CT	0	2	0	0	2	null	null	intergenic-intergenic	null	null	null	null	null	null	null	null
Os01circ15341	HWI-ST620_0171:3:2206:12041:164959#0/1_A_GTGCATTATCCCCGGCGGCGAGGTGGCCCGGTGCTCGTCGGGGCTGAGTGGCCCTCCTGCTGGAACTGCTTCCGGCCCTGCTGCGCGTCGGGGCGGAGCA	chromosome01	24169982	24171880	plus	AG	GT	0	2	0	0	2	null	null	cds-cds	null	null	null	null	null	null	null	null
Os01circ15569	HWI-ST620_0171:6:1204:20490:65386#0/1_A_CTTTTTTTCAGCATCATCTGGTACTTCTTCCACAACATAACGAAGCAATTGCTCCACCTGGGCTCTGTCACGCAAGCTATTTTTCCCATGAACTGGAGGC	chromosome01	24407613	24413181	plus	AG	GT	0	0	0	2	2	null	null	intergenic-3utr	null	null	null	null	null	null	null	null
Os01circ15570	HWI-ST620_0166:8:2205:10913:50875#0/2_A_GTAGGCTTCTTTCCTAAACTAAAAGCGGTGGTTCCCGCCTCCCTGTGCCTAAAGCGGGGTGGGCGACTGCGGTTCGAACCTTCACGAAAGTGAAACGAGA	chromosome01	24445174	24445281	minus	AC	CT	0	0	2	0	2	null	null	intergenic-intergenic	null	null	null	null	null	null	null	null
Os01circ15723	HWI-ST620_0167:5:1308:18475:111175#0/2_A_CTTGTCTAGTCGAACTTAAAGTTGCTGTCATGGGATAAATTGCATGAAAATGATGCAATGTAGGAATCGTTTGGAGATGTCTAGGGTGTATCTTTTTTTT	chromosome01	24628007	24628351	minus	AC	CT	1	1	0	0	2	null	null	intron-intron	null	null	null	null	null	null	null	null
Os01circ15992	HWI-ST620_0166:8:1201:19963:125508#0/2_A_TGGGAGACATATTCTCAGTCGTGATTACATGACACTGAAGAGGTGATAACATCTGCTGAGTTCCACCCTACTCACTGTAATACATTGGCTTATAGTAGCT	chromosome01	25205117	25205494	plus	AG	GT	0	0	2	0	2	Tc1/Mariner	null	cds-cds	chromosome01	25205117	+	Os01t0600200-01	chromosome01	25205494	+	Os01t0600200-01
Os01circ16024	HWI-ST620_0177:7:1306:2612:14297#0/1_A_CCTTCGCGGCGGCCTTGCCGGCCAGCGCCGGGGACGAGAGGGCCATGGTGGCGGCGGCCATGTCTACCTCGCTCTGCTCTTGCGCATGGTGATGCGCCCC	chromosome01	25238096	25238205	plus	AG	GT	0	0	2	0	2	null	null	cds-cds	null	null	null	null	null	null	null	null
Os01circ02263	HWI-ST620_0171:4:2104:5480:99445#0/2_A_GCCCGCAGTCCAAAATTGATCCCGAACAAATTAGGGCTCGTGCTAAGCAGGTTGTCCAAGACCAGCGCCGGCTAAAGATGAACAATTCATTGCTGAGTTT	chromosome01	2562324	2563677	plus	AG	GT	0	2	0	0	2	null	null	cds-cds	null	null	null	null	chromosome01	2563677	+	Os01t0147200-01
Os01circ16335	HWI-ST620_0171:6:1302:9418:71037#0/1_A_GCCAGCTCCAAAATCTGCTCGGGGAATACTTCTTTTTTTCGCTCAAAGTCGTTTTTACTCATCTCCTTTATGGAATAGCACATGATTAGTGTGCGCAAGT	chromosome01	25654967	25655068	plus	AG	GT	0	0	0	2	2	null	null	intergenic-intergenic	null	null	null	null	null	null	null	null
Os01circ02357	HWI-ST620_0167:7:1104:7247:135265#0/2_A_GGTAAAGTTGCTACACCAGATCAAGCACAAGAAAGGTGGTTGTCAGCCCACCTTATGTGTTCCTTCCCGTGGTCAAGAGTCAGCTGCGCCCGGAGATCCA	chromosome01	2589622	2591163	minus	AC	CT	1	0	0	1	2	null	null	cds-cds	chromosome01	2589622	-	Os01t0147900-01	chromosome01	2591163	-	Os01t0147900-01
Os01circ02362	HWI-ST620_0171:2:1101:10261:142045#0/1_A_GAATTTTCACAATTTTGTCCACCTGATCAGTGGTCCCGTTCTCATTTGATTCACCCAACAAACTCCTCCTTTCAGAGTGTCCAAGAATAACCCAGGGAAT	chromosome01	2590601	2591372	minus	AC	CT	0	0	1	1	2	null	null	cds-cds	chromosome01	2590601	-	Os01t0147900-01	chromosome01	2591372	-	Os01t0147900-01
Os01circ16576	HWI-ST620_0166:8:1302:6808:189678#0/2_A_GTGGCGGCGGACATGGACTCGAGCGACCCAGAGTTCAGGGGATTCAAGGGAGGACGCGTGTACCGCGGCAGCGGCGCTGCGCGCCGCCGTGGAGAGGCAG	chromosome01	25982397	25982499	plus	AG	GT	0	0	2	0	2	null	Mutator	intergenic-intergenic	null	null	null	null	null	null	null	null
Os01circ16817	HWI-ST620_0171:3:1206:2595:162957#0/1_A_GGGGGTGTTTCTGATGTATGGATCGGATTATCTGTCTCTCTTTTTCCTCTCTTCGATGGCTGCTTCTTATTTTTGCTCGTACCATTACTCGGTGATGGTG	chromosome01	26194501	26197713	plus	AG	GT	0	2	0	0	2	null	null	cds-cds	null	null	null	null	null	null	null	null
Os01circ16818	HWI-ST620_0173:6:2303:15406:145670#0/1_A_GGGGGTATTTCCGGTGTATGGATCAGGTTGTCTGTCTTTCTTTTTCCTCTCTTCGATGGCTGCTTCTTATTTTTGCTCGTACCATTACTCGGTGATGGTG	chromosome01	26195543	26197713	plus	AG	GT	2	0	0	0	2	null	null	cds-cds	null	null	null	null	null	null	null	null
Os01circ16898	HWI-ST620_0166:8:2208:15281:33259#0/2_A_CTTCCGTTCCTAAAGAGCGACAGACATTGCTATTTTCTGCTACTGTGCCAGAGGAGATTCTTGTTGCTACACCTGGAAGGCTTAAAGACCATGTTGAGAA	chromosome01	26230441	26230647	plus	AG	GT	0	0	2	0	2	null	null	cds-cds	chromosome01	26230441	+	Os01t0618400-01	chromosome01	26230647	+	Os01t0618400-01
Os01circ17164	HWI-ST620_0171:7:2104:10563:18168#0/1_A_CAACCAAATAGTAAATGAAAAGAACCAGTTGACGATATGACTGGAGAAGACATAGCAGCATCCCCTGTTTTGGGTACCTTCGAAAATGGGAAGGTATATG	chromosome01	26441701	26442454	minus	AC	CT	0	2	0	0	2	null	null	intergenic-intergenic	null	null	null	null	null	null	null	null
Os01circ17165	HWI-ST620_0171:3:2204:9737:185552#0/2_A_TTCGAAGGTACCCAAAACAGGGGATGCTGCTATGTCTTCTCCAGTCATATCGTCAACCTTGGCAACTGGTTCTTTTCATTTACTATTTGGTTGACGTTTG	chromosome01	26441696	26442458	plus	AG	GT	0	2	0	0	2	null	null	5utr-cds	null	null	null	null	null	null	null	null
Os01circ17178	HWI-ST620_0177:8:1102:6838:106208#0/1_A_GCCTGAATGACCTTCGGCGCTCCTGATACAGTTCTCCTTCTGACATCTTTTGCCACCTCCATGAGCAACACAGTATTGAGTTCCGCCATGCACGCTCTTC	chromosome01	26442826	26443134	plus	AG	GT	0	2	0	0	2	null	null	cds-cds	null	null	null	null	null	null	null	null
Os01circ17216	HWI-ST620_0167:6:1202:17858:102713#0/2_A_CAGTGGTCAAAACCATATATCAAGCAGACGCCATATCTGAATACATTATTTACCAAGTAAACTCTGGGGCTCAATGTATACAAATATTTGATTCATGGGG	chromosome01	26456846	26456973	minus	AC	CT	2	0	0	0	2	null	null	cds-cds	chromosome01	26456846	-	Os01t0622300-01	null	null	null	null
Os01circ17238	HWI-ST620_0167:5:2302:20531:117262#0/2_A_TTAAAAGAAATGTTCAGATCCTTGGATACTGATAACAGTGGGACAATAACTCTTGAGGACCTTGTTGGAAGTGCGTATTATGTTGCACCTGAGGTGCTGA	chromosome01	26471512	26472494	minus	AC	CT	2	0	0	0	2	null	null	intergenic-intergenic	null	null	null	null	null	null	null	null
Os01circ17450	HWI-ST620_0173:6:1306:16737:2467#0/2_A_CAGATCCTTGTACAGGAACAATAGTGTTGAATAAAACGGATCTGACAATTCTTGGAGTTGACCTGGCAAAAGTTGTAATAGTTGACAATACTCCACAGGT	chromosome01	26768042	26768787	plus	AG	GT	2	0	0	0	2	null	Tc1/Mariner	3utr-3utr OR cds-intergenic	null	null	null	null	null	null	null	null
Os01circ17625	HWI-ST620_0177:8:2301:4439:166159#0/1_A_CTGGAAATTCTCTTTCTCTGCAATCCTCTCTTTAGCTTGTTCCTTTTCTCTTTCCATTTTGTATATTTCTTTGTCTTCATCTAGTCTATGCAAGACCTCC	chromosome01	27051528	27051874	minus	AC	CT	1	1	0	0	2	null	null	intergenic-intergenic	null	null	null	null	null	null	null	null
Os01circ17788	HWI-ST620_0173:6:1107:19410:129256#0/1_A_GGGCCAAGGTGTGTTCACGAATCCCCAAATCAACCGCAGAGATCGGGGGTAAAAGGTTGGATATGCGCCTAAACTTTCGTTAAAGGCTGTTGAGTTGGAC	chromosome01	27430845	27432250	minus	AC	CT	1	1	0	0	2	null	null	intergenic-intergenic	null	null	null	null	null	null	null	null
Os01circ02545	HWI-ST620_0166:8:1208:7100:139657#0/2_A_CAACAATTGCTGCTCGGCAAAGTGGTGCTGGCATTTCTTGGCTCTTGCCTTTTGAGGGGTTACTGACAGAAGGATTTTTCTGGATTCCATCTTTGGGAGG	chromosome01	2771004	2771108	plus	AG	GT	0	0	2	0	2	null	null	cds-cds	chromosome01	2771004	+	Os01t0151200-01	chromosome01	2771108	+	Os01t0151200-01
Os01circ18129	HWI-ST620_0177:8:1103:14709:103591#0/1_A_GCGCAAAAATATTTTTAAATGTTCATCGTCGAATCACATGAATAAATATGCAATCTGGTATAGAAGCAAACTCGCCCTAGTGCTTTGTACAAAGCCCACA	chromosome01	27808370	27808764	minus	AC	CT	0	2	0	0	2	null	null	intron-intron	null	null	null	null	null	null	null	null
Os01circ18205	HWI-ST620_0177:7:1104:15493:88216#0/2_A_CCATGACGAGCATCTTCCAGGCCCCAGGAAAACTAGCGCAAGAGTTCGGGCTGGCCAACGTGACGGCCATTCAGGTGGGTGCCGGGCCGGCCGACTTCCC	chromosome01	28038144	28038887	plus	AG	GT	0	0	2	0	2	Tc1/Mariner	null	intergenic-intergenic	null	null	null	null	null	null	null	null
Os01circ18363	HWI-ST620_0171:5:2205:18089:57831#0/2_A_GAATTACGATGGAGATGTGCAGAGTGATTTCTTAGCTCAAGGCTTTGGTTCATTGGGTTTGATGACATCAGTATTGGTACAATGTGGCTATTAAGTGTGC	chromosome01	28263944	28265396	minus	AC	CT	0	0	1	1	2	null	null	cds-cds	chromosome01	28263944	-	Os01t0654500-01	chromosome01	28265396	-	Os01t0654500-01
Os01circ18369	HWI-ST620_0167:4:2108:20487:6875#0/2_A_CTTTGTCTATGTACAACACTGATGAGATGACCAGGATATTCTGGCAGTCTATCAAGGACAAGCTTATCTTTCCATTTTTGGATCTGGACATTAAGTACTA	chromosome01	28264676	28265921	minus	AC	CT	2	0	0	0	2	null	null	cds-cds	chromosome01	28264676	-	Os01t0654500-01	null	null	null	null
Os01circ18460	HWI-ST620_0166:8:1206:3681:17942#0/1_A_CAGGGTTATCATCAATTAAATTATCAGTCTCTCCTTCCATACCTTACTCTCCACCAAGGCTTCACAATCATCAGCGCCACTTGCAACATCCAGCTCAAGG	chromosome01	28332038	28332162	minus	AC	CT	0	0	2	0	2	null	null	cds-cds	null	null	null	null	null	null	null	null
Os01circ18618	HWI-ST620_0166:6:2208:16433:68118#0/2_A_GAGAGACTGATAATTTAATTGATGATAACCCTGGGGATGGTGTCCTGAAGTTCAAGAGATCGTCTCCGGCATGCATGCAGGCATTGAGAAAGGTATGGAA	chromosome01	28332115	28332215	minus	AC	CT	0	0	2	0	2	null	null	cds-cds	null	null	null	null	null	null	null	null
Os01circ18914	HWI-ST620_0167:6:2205:12418:62796#0/2_A_CTTTCCAGATATGATCATAGTAAAGTTAGGAGCTCTAAGGAGCAAAGGTATGATGATGGTGGTGCTAAGAAGAATGGCTCCAAGGCAAGTAGGGGAGAGG	chromosome01	28336172	28337076	minus	AC	CT	1	1	0	0	2	null	null	cds-cds	null	null	null	null	null	null	null	null
Os01circ18976	HWI-ST620_0171:3:1302:11213:151428#0/2_A_TCTCGCTCTTTCTGTCTCTCCCATTCTTTCTCCTTTTCCCTATCTCTCTCCTTCTCCCTATCTCTCTCCCTCTACTTGCCTTGGAGCCATTCTTCTTAGC	chromosome01	28337036	28337343	minus	AC	CT	0	2	0	0	2	null	null	cds-cds	null	null	null	null	null	null	null	null
Os01circ19024	HWI-ST620_0166:6:2205:10751:133711#0/2_A_CATCTTCAAGATCTTCTAGGAGTCACATTTGCACAAACTTCAGACTCCATTGATCCTGTGTTCTCTCTGACCTCAGACATTGGTTTCAAAATTATGGCAG	chromosome01	28346522	28346741	minus	AC	CT	0	0	2	0	2	null	null	intergenic-intergenic	null	null	null	null	null	null	null	null
Os01circ19040	HWI-ST620_0171:4:2301:19242:58613#0/1_A_GCCCTCCTCTTCCTCTTCTTCTTCTTCTTCGTATGCTTCTCCCTCTCGCTGCTTCGCTTTGCTTTGCTTGCTTCCCTTTGCAAGTCCACGGCTCCTAATA	chromosome01	28358633	28359822	plus	AG	GT	0	2	0	0	2	null	null	cds-cds	null	null	null	null	chromosome01	28359822	+	Os01t0655800-01
Os01circ19068	HWI-ST620_0166:7:2202:3518:87922#0/2_A_CGAGGACGAGGACCGCGCCCGCGTGCCGGGAGCGGATGCACGTGGTGCTCGCGGAGGAGGTGCGGGTGCGGAGGCTGCTGCAGGGCGGGGGCGGCGGCGC	chromosome01	28383134	28383239	plus	AG	GT	0	0	2	0	2	null	null	cds-cds	null	null	null	null	null	null	null	null
Os01circ19287	HWI-ST620_0166:7:2104:10665:75269#0/2_A_TCCAGACGTGCCAGTCGCTGGGCGTCAAGGTCATCCTGTCCATCGGCGGCGGCGCCGGCAGTGCGAACCAAGCTCCGGCGGCTGCACCGGCCAGAGCTCG	chromosome01	28615468	28615571	minus	AC	CT	0	0	2	0	2	null	null	intergenic-intergenic	null	null	null	null	null	null	null	null
Os01circ19454	HWI-ST620_0167:5:2204:8711:133467#0/1_A_TTGCTTCTGTGTAGAATTAGTTGCTAGCACGCCAGGTGTCTATCAGAAGGTATAGCTGAGCTGCTCTCTCCTACATGAGAATTATTATACGAGTTCGCAT	chromosome01	28837132	28837802	plus	AG	GT	1	1	0	0	2	null	null	intergenic-intergenic	null	null	null	null	null	null	null	null
Os01circ19456	HWI-ST620_0177:7:1302:19214:16466#0/1_A_CCTTTTTCTTGTCGCGCTTGCTCTTTACCTCTTGAAACGTATCTTCATCATCATCATCATCGTTATCATCATAGTGATTCCCTCGAGACTGGTATGCACT	chromosome01	28837020	28838305	minus	AC	CT	0	0	2	0	2	null	null	cds-cds	chromosome01	28837020	-	Os01t0663800-01	chromosome01	28838305	-	Os01t0663800-01
Os01circ19462	HWI-ST620_0177:6:1202:7663:82291#0/1_A_CATGGGCTCTGGAACGGGATCTGATTGAGGTTTGGACAATATCTTGCTCGGAGGGAGTCAGGAACCTTGTGTATGGGTCACCCAGGTTAGCCAGCATTTT	chromosome01	28845911	28846021	plus	AG	GT	0	0	2	0	2	null	null	cds-cds	null	null	null	null	chromosome01	28846021	+	Os01t0664000-00
Os01circ19586	HWI-ST620_0167:4:1101:18284:56619#0/2_A_GTAAATACTGGTCTGGCAAAAAGCTACATTGTAGAGAAATTGAAGACTAGCTTATTTTCATCAGCATGCTGGCATGCATGCTCATAATCTGCTTGATCAT	chromosome01	29034072	29035946	plus	AG	GT	2	0	0	0	2	null	null	intergenic-intergenic	null	null	null	null	null	null	null	null
Os01circ19663	HWI-ST620_0177:8:2303:12909:36966#0/1_A_CCATTTAAATGCTGCACCAGGTGCATGGTTGCCATCAGGTTGACGGAAGCCAGAACTTAGAAGTGCATTACAACAAACTTGACAAGCATCCTTCGTGTAT	chromosome01	29231453	29232343	minus	AC	CT	1	1	0	0	2	null	null	cds-3utr	null	null	null	null	null	null	null	null
Os01circ19841	HWI-ST620_0173:6:2208:5907:96335#0/1_A_CGCGGGGGACGCCATGGTCGGCGCGGGCGGGAGGTAGCTAGGGTTTTTGGCTTTGCATATAATAAACGGCAGCTTGACTCGGCTGCTGCTGATCTGGTTG	chromosome01	29361901	29363142	plus	AG	GT	2	0	0	0	2	null	null	intergenic-intergenic	null	null	null	null	null	null	null	null
Os01circ19845	HWI-ST620_0173:6:2106:16097:72202#0/2_A_CTTGAAGGAAGGCAAGAAGAAGTGCCTGAGGATGATGGATGGGTTAACTAAGACAGATGATCTCGTTTTTGTTCTAGCCGCCACAAATTTGCCATGGGAA	chromosome01	29390693	29391738	minus	AC	CT	1	0	1	0	2	null	null	cds-cds	chromosome01	29390693	-	Os01t0673500-01	chromosome01	29391738	-	Os01t0673500-01
Os01circ19848	HWI-ST620_0166:6:1206:11870:61712#0/2_A_CGGCCATCTGCTCATCTTCATGTACATAGATACGAAAAATTCAATCAAGACTATGGCAGTCATGTCCTCAGCTAAAGACAATGCTAGCAAAAGCTGTGGC	chromosome01	29390012	29393353	minus	AC	CT	0	0	1	1	2	null	null	cds-3utr	null	null	null	null	chromosome01	29393353	-	Os01t0673500-01
Os01circ02731	HWI-ST620_0167:7:2302:13942:74514#0/2_A_TGTGGTAGATGATGATTACACCGATGCTGTCCTCGTTCGGCGTCGTGCTCCTCGAGGCGCTGTGCGCGCGCCCCGTCGTCGACCCGAGGTTGCCCAAGCC	chromosome01	2984456	2984903	minus	AC	CT	2	0	0	0	2	null	null	intergenic-intergenic	null	null	null	null	null	null	null	null
Os01circ20521	HWI-ST620_0173:6:1201:20361:114165#0/2_A_GCGTGTACCAGTGGAGACTGCAGGCAGAGATAGCTATGAGAGCAGATGGGAAACCAGGAATGTCTGATGAGAAGGCCAGGATATACCACTTCTACATCCC	chromosome01	29857279	29859090	plus	AG	GT	1	1	0	0	2	null	null	cds-cds	null	null	null	null	chromosome01	29859090	+	Os01t0682500-01
Os01circ20754	HWI-ST620_0173:6:2308:3710:62519#0/2_A_CCATGATAAAATTAGTGATCATACGATGGAAAGGAAAGCGAGGAAATGATGCAGAATCTGTTCCTGGTACTAATGGAAGTGACTTGTCTCAGACTGATGA	chromosome01	30181365	30183660	minus	AC	CT	2	0	0	0	2	null	null	cds-cds	chromosome01	30181365	-	Os01t0689451-02	null	null	null	null
Os01circ20820	HWI-ST620_0166:8:1103:11311:136456#0/1_A_GATATCTCAAAGCATGGAAGACCATCATCACACATGTTTTCTAAATTGCTCAACCCGGCGCTTGATTTCTGCGATAGATAGTGGAGGTTTGTCGGCATTG	chromosome01	30272548	30272653	minus	AC	CT	0	0	2	0	2	null	null	cds-cds	chromosome01	30272548	-	Os01t0691500-01	chromosome01	30272653	-	Os01t0691500-01
Os01circ21048	HWI-ST620_0167:7:2203:6640:184013#0/2_A_GCCAGTTATTAGATCAAATTACAACAAATGAAGGAAGGAAAGATCTGAACAAGTATAATGTACATGTATATAGGCGCATTGTTGAAATTCAGACAACTTC	chromosome01	30483491	30483728	minus	AC	CT	2	0	0	0	2	null	null	cds-cds	null	null	null	null	chromosome01	30483728	-	Os01t0695300-01
Os01circ21049	HWI-ST620_0166:7:2202:9414:68545#0/1_A_GAAATTTGGCTGCGAAGGACGAGTCCATCATTTATAGCTATGAGGCCGACCGGCAAATAAAATGAATAGTAAGCTGTCTTATATTCCACAATGCGCCTAT	chromosome01	30483452	30483925	minus	AC	CT	0	0	2	0	2	null	null	cds-cds	chromosome01	30483452	-	Os01t0695300-01	chromosome01	30483925	-	Os01t0695300-01
Os01circ21253	HWI-ST620_0171:3:1302:5191:43639#0/2_A_GGTGGCGTTGGTAGTAAAATTGACTCAAAAGGTGTACATACTAGTCCCGCCTGAAGTGCATAAAGCCAAACATCAAGAAGAACTTTGTAAATACTTACAG	chromosome01	30802528	30802688	minus	AC	CT	1	1	0	0	2	null	null	3utr-3utr	null	null	null	null	null	null	null	null
Os01circ21523	HWI-ST620_0171:6:1107:20941:45042#0/1_A_CCAAGGACCAAAGAGAACAACAATAATGAGATGTGGATTGCAATACAGACAACCAAAGGGTTCTTCATTAAACTAAAGAGCAACACTACATAACACACAA	chromosome01	31190034	31190578	plus	AG	GT	0	1	0	1	2	null	null	intron-intron	null	null	null	null	null	null	null	null
Os01circ21579	HWI-ST620_0173:6:2207:15641:123965#0/1_A_GAGTATTAGGGACAGTCCCATCCGTCTGCTCTGAAAGGTAAAGACGCTGACGATTCTTGTAGGTAGCCTTCTCATGATCCCACACATTTAAGAAGCCGTC	chromosome01	31231848	31235089	plus	AG	GT	2	0	0	0	2	null	null	cds-cds	null	null	null	null	chromosome01	31235089	+	Os01t0710000-01
Os01circ21761	HWI-ST620_0177:6:1207:2832:22598#0/2_A_TTGTAAAACAGCACCAAGAAGTCATAATGCTTCCTGTAGGAGGGAAGCATGCTCTCTTCTCGTGCAGCTGCTACCGCATGATCTTCCAATAATCACCCAG	chromosome01	31296029	31296130	plus	AG	GT	0	0	2	0	2	null	null	cds-3utr	null	null	null	null	null	null	null	null
Os01circ21862	HWI-ST620_0167:7:2101:14186:70131#0/1_A_GTCATCATGGCTTTGCTTTGTCATAAGCAGCAAAGAATCTCTTGCTGTTGCATCTTTTTCAAGTTATAAAATTTAAAAACTAAGTGCTAGGAACCTCGGT	chromosome01	31384725	31387856	minus	AC	CT	1	0	0	1	2	null	null	intergenic-intergenic	null	null	null	null	null	null	null	null
Os01circ21897	HWI-ST620_0171:7:1105:17898:112538#0/1_A_CCGGTTTGTTAGCTCCTCCACACGTTCCTCCAATTTCTCTTTTGCCACCTTAAGAGCTTGTGTATCTCTTGCATTCGCTGTTCCATTTCATTAAGAGCGG	chromosome01	31394564	31394865	minus	AC	CT	0	2	0	0	2	Tc1/Mariner	null	intergenic-intergenic	null	null	null	null	null	null	null	null
Os01circ21907	HWI-ST620_0171:7:1202:6180:89621#0/1_A_TGTGTCTTTAGGATGTATATCTGATACATTTGCAATAACCGTCTTTCCTCCTGTTCCAGACCGCCCACCCAAATATGCAAGATATCTCATCAGCAGTTTC	chromosome01	31402469	31403089	minus	AC	CT	0	1	0	1	2	null	null	cds-cds	null	null	null	null	chromosome01	31403089	-	Os01t0713900-01
Os01circ21990	HWI-ST620_0177:8:1304:9288:70744#0/1_A_CTGCCCCTCGCTCGCGTCCGTCGCGACCACGCTGTCGTAGTGCTCCGCGATGTTTCAGTTCAGCACTTTGGGCTTCCCGGCGAGCATGAAGGCCTTGAAC	chromosome01	31550750	31551394	plus	AG	GT	0	2	0	0	2	null	PIF/Harbinger	cds-3utr	chromosome01	31550750	+	Os01t0716500-01	null	null	null	null
Os01circ22018	HWI-ST620_0167:4:2208:9340:40833#0/1_A_GTCCCATTCTAGGTTGTTTAGCATGTATTAGGGTTAGAAAAAAAATACTACAATACCTCTTATTAAATAGTAGTAATGAGGTGATTAATCGTGAGTTATG	chromosome01	31564938	31565146	plus	AG	GT	2	0	0	0	2	Tc1/Mariner	null	intron-intron	null	null	null	null	null	null	null	null
Os01circ22588	HWI-ST620_0166:6:2105:9335:150130#0/1_A_TCTGCTTTATTTTCAACTTAGTTGCTGCTGTGCCTAGCAACTGCTGCATCAGAACAGCCAATATACCACCAGTTGAGATATTTAGTACATTGACAACATC	chromosome01	32130209	32134930	plus	AG	GT	0	0	2	0	2	null	null	cds-cds	chromosome01	32130209	+	Os01t0729100-02	null	null	null	null
Os01circ22676	HWI-ST620_0166:7:2205:13715:197722#0/1_A_GTGTTGTTGTTATTGCTTGATTGTGCTTCCAAGGCTTGGGCTTTTTCAGCTTCTTGCTGTTATCTTTCTGCCCACCATAATGTGGAGCAGTGTCCCAGAA	chromosome01	32233286	32233408	minus	AC	CT	0	0	2	0	2	null	null	cds-cds	chromosome01	32233286	-	Os01t0731000-01	chromosome01	32233408	-	Os01t0731000-01
Os01circ22694	HWI-ST620_0167:7:1203:16089:80768#0/1_A_CCTGAGCTGAGACATGTGCAGAAGTATCTCGTCTCGGCCTTGATTGGTGACACTGCTCGTCATGATCCAAGGGGGTGCTGAATTGCCGAGGCATCAATGA	chromosome01	32270606	32270787	minus	AC	CT	2	0	0	0	2	null	null	intergenic-intergenic	null	null	null	null	null	null	null	null
Os01circ22919	HWI-ST620_0171:2:2303:6591:94184#0/2_A_CGTCGGCCACGGCGGAGGTCATGCCGACGTTCTACGCCTACGCCGCCTCCGGTTCGGTGTCCGCCGAGGCCGTTCGCCCTGTCGCAGGAGACGTACCCGA	chromosome01	32656589	32656700	minus	AC	CT	0	0	0	2	2	null	null	cds-cds	null	null	null	null	null	null	null	null
Os01circ22941	HWI-ST620_0166:6:2208:16796:71483#0/2_A_GCGGAACGCCCGTGCCGCGGGCGCCGCCGCCGCGATCGTGAGTACCTCGCCTCCCGCGGCGTGGACGTCGCCGGGAAGGTCGCGCTCGTGCGCTACGGAA	chromosome01	32666365	32666486	plus	AG	GT	0	0	2	0	2	null	null	intergenic-intergenic	null	null	null	null	null	null	null	null
Os01circ02956	HWI-ST620_0166:8:1203:15868:132060#0/2_A_CCTGAGTTCTTTGCCAACTTCTCTTTCTTATCAATTCTGGAGCTATCTGGCAATGTCCGTTCACTGACAATGATCAACGTCAGACTCAATGTCATCAGTG	chromosome01	3272563	3272670	minus	AC	CT	0	0	2	0	2	null	null	5utr-5utr	null	null	null	null	null	null	null	null
Os01circ23133	HWI-ST620_0167:6:1303:15042:51768#0/2_A_CTCAAGTGATGTTAAGGGACTGGATGATGATGGTGGAGCAGAGAAAGAAGAGGAGGGTCCATTGAAGCTTGCAACTGGGGATGCTGGTAGCAGGACGGCT	chromosome01	32861486	32861707	minus	AC	CT	2	0	0	0	2	null	null	cds-cds	null	null	null	null	chromosome01	32861707	-	Os01t0744400-01
Os01circ02967	HWI-ST620_0166:7:1204:6437:60401#0/2_A_TTCCTCCTCAAGGTCCTCCTTCCTATGGTGGGCCTGGTGGTGACTATGCAGCACCTCCAACCAAAGGGGAGACGAAAGTGGTTATGACGCTGGTAGCTAT	chromosome01	3323212	3323318	minus	AC	CT	0	0	2	0	2	null	null	intergenic-intergenic	null	null	null	null	null	null	null	null
Os01circ23425	HWI-ST620_0171:2:1201:3490:158417#0/2_A_GATAAAGCATTATATTCATTATTTTTGGCATATATATATATCCCTAGTATATTATGTTTGCTTATTCTCAGATGCTCTGCTCACTATGGCAGTATTTTGT	chromosome01	33306583	33307097	plus	AG	GT	0	0	0	2	2	null	null	intron-intron	null	null	null	null	null	null	null	null
Os01circ03012	HWI-ST620_0167:5:2302:1311:63421#0/1_A_GTCGCCTCACGCCGCCGCCTCGCTTGGTGGCATGGCGAGCGTGTCGGTGTCGGTGGTGGTGTGTGCCCTCCTTTCCCAGCCATGCACCCTTTCTTGGACC	chromosome01	3355613	3356599	plus	AG	GT	2	0	0	0	2	PIF/Harbinger	null	5utr-cds	null	null	null	null	null	null	null	null
Os01circ24001	HWI-ST620_0171:2:2201:2862:52496#0/2_A_TATCCAACACCTGCAAGGAACATGAATACGGCGATAAAGGGCCAGAGAACCGCCTGTCAGCTCTAGAAGAGAAATGCTCCAAGAATGAACATGATGAAGC	chromosome01	34058187	34058297	plus	AG	GT	0	0	0	2	2	null	null	intergenic-intergenic	null	null	null	null	null	null	null	null
Os01circ24125	HWI-ST620_0167:7:1201:13041:169852#0/2_A_TGAATCTGAGATGGCAAACAAACAAATGTCTTTTGATGCAGCAATGGAGGCAATAGTTTCAAGAGAGGAAGCTCTGATTCAGAAGGAATCCCTGCTTGAC	chromosome01	34059903	34060277	minus	AC	CT	1	1	0	0	2	null	null	intergenic-intergenic	null	null	null	null	null	null	null	null
Os01circ24154	HWI-ST620_0171:8:1301:20792:132327#0/1_A_CTAAGTTGCTCATGCTTGGATGTTAACTCCTTCCGTTCAGCTTCAAGAATATTCTTTTCTTCTTCCACTCTTTTCTCTGAGTGAGTAACATAAGCTAATC	chromosome01	34060320	34061293	minus	AC	CT	0	2	0	0	2	null	null	intergenic-intergenic	null	null	null	null	null	null	null	null
Os01circ24446	HWI-ST620_0166:8:1108:7453:167806#0/2_A_TTTCGAATCACAGAAAGCTGTACTCTGATGTTTTTGTGGTTGGGGGGCACAAATGCTCCTGCAGCAGGACCAGGATGAGGAGATGCTGGTGCCAGACCAG	chromosome01	34298091	34299030	minus	AC	CT	0	0	2	0	2	null	null	cds-cds	chromosome01	34298091	-	Os01t0771350-01	chromosome01	34299030	-	Os01t0771350-01
Os01circ24455	HWI-ST620_0177:8:2204:20087:140426#0/1_A_GGGGAAAAGGAAGGTAGCAAGAAAGCTCACAAACCACAATAGTCCAAGAGTTTCATATACGCAAAATGAAGCATAGAAGATCACTGATTCACAGGCTCAC	chromosome01	34317504	34318041	minus	AC	CT	0	2	0	0	2	null	null	intron-intron	null	null	null	null	null	null	null	null
Os01circ24998	HWI-ST620_0167:6:2203:2470:31296#0/2_A_TTGGTGGCTGATATAGATATTGAGTCTGAGAAGTACAGTTGGCGTCTTCTCTTGACCTTGCGCGCTACGATGGCATTGTCTGTGTCAGCGGCGATGGTGT	chromosome01	34879834	34881272	minus	AC	CT	2	0	0	0	2	null	null	cds-cds	null	null	null	null	null	null	null	null
Os01circ03242	HWI-ST620_0167:4:2206:17237:64862#0/1_A_GTGGGGTCGAAGGGTTAACCATTCCAGACTGAGGCGGTTGTGAATATTGAGGCAATTGGGGTGGGGTTTGGTACTGCTTGTGGTAGTATTTGGGCTGTGG	chromosome01	3591389	3591845	plus	AG	GT	1	1	0	0	2	null	null	intergenic-intergenic	null	null	null	null	null	null	null	null
Os01circ03250	HWI-ST620_0171:7:1202:15928:87762#0/1_A_GGCAGGAAGTGCTAGTGGTTGTGAAGAGGTGAGGGTGACGACTTCATCCCTGCATTGCCACGGTGTGAAGGGGATCCGCTGTAACCATATGATTCAGAGA	chromosome01	3591473	3592122	plus	AG	GT	0	2	0	0	2	null	null	intergenic-intergenic	null	null	null	null	null	null	null	null
Os01circ26305	HWI-ST620_0177:8:1304:3256:91922#0/1_A_GTTTTAACTCCTCGCTGTTGCACTGGAAATTTCGTAACCACACCTTTTTTTTTTGGTTAGCGTCTTCGTTCGGTTCAGACCAAAAATTTTACAATACAGA	chromosome01	36411615	36411769	minus	AC	CT	0	1	0	1	2	null	null	intergenic-intergenic	null	null	null	null	null	null	null	null
Os01circ26341	HWI-ST620_0167:5:2101:16392:129778#0/2_A_GTCAAAACTGTGTTGCATGAACTTGTAAAGCTTCGTGGTACAGCAATCAAAGGTCACCTTTCAAGATGGCCATCCCCTACACCACCAGAGTCCCTCGCAG	chromosome01	36437012	36437461	plus	AG	GT	2	0	0	0	2	null	null	intergenic-intergenic	null	null	null	null	null	null	null	null
Os01circ26382	HWI-ST620_0171:3:1304:13427:125358#0/1_A_TGTACAGCAGCAGCTAGCACCATGGATGGGTTCCTGAGCTTGGTTGGGGGTTCTGCTTTATTATGCGGGGAGATACTCATGTACATATATATTATAGACA	chromosome01	36478580	36479015	minus	AC	CT	0	2	0	0	2	null	null	intergenic-intergenic	null	null	null	null	null	null	null	null
Os01circ26436	HWI-ST620_0166:7:2303:21038:171133#0/1_A_CACCAGTCAATATTTTTAGTATCAGAGGAAAGAGAGTGGGAAGCCAGTGTGACCAACCATGTCACCATTCGGCAGGTTGACACGTACCTAAAAGAGTAAT	chromosome01	36536130	36536825	minus	AC	CT	0	1	1	0	2	null	null	intergenic-intergenic	null	null	null	null	null	null	null	null
Os01circ26444	HWI-ST620_0171:6:1301:12004:57790#0/2_A_CACTTCTCGACAAGAACGGTGGTATCCAGATTCTTACCTCACATACTCTTCAGCCGAATGACTGGGATGTGGTCAAACGTGGGTGGGATGCCCAGGTGCT	chromosome01	36535697	36537126	plus	AG	GT	1	0	0	1	2	null	null	cds-cds	chromosome01	36535697	+	Os01t0817700-01	chromosome01	36537126	+	Os01t0817700-01
Os01circ26445	HWI-ST620_0166:7:1107:10942:55276#0/2_A_CTGGCCAGCCACTTCTCGACAAGAACGGTGGTATCCAGATTCTTACCTCACATACTCTTCAGCCGATTATTTTGGACGCGATTGAACAAGTCGGTGGTAT	chromosome01	36536971	36537126	plus	AG	GT	0	0	2	0	2	null	null	cds-cds	chromosome01	36536971	+	Os01t0817700-01	chromosome01	36537126	+	Os01t0817700-01
Os01circ26469	HWI-ST620_0171:2:1301:9135:126970#0/2_A_TTCTCATGTTGCTTGATTATTTGTTTACCTCCAAAGAAGTGTATTTGTGTTGATTGCTACATTATTTTGTGATGTTCAGTTATTTTATATTATTTGCTAT	chromosome01	36583110	36583855	plus	AG	GT	0	0	0	2	2	null	null	intron-intron	null	null	null	null	null	null	null	null
Os01circ26764	HWI-ST620_0166:8:1106:6205:80443#0/1_A_CACCCTCCGCCGCGCGTCCTTCCCCACGGCCTGCGGCTCCCCGATGACCGTCGCGTCGTACACCCTCGACAGCACACCACCCGCGCGGCCATCAGCTTCT	chromosome01	37120819	37120922	minus	AC	CT	0	0	2	0	2	null	null	cds-cds	null	null	null	null	null	null	null	null
Os01circ03354	HWI-ST620_0173:6:2303:7290:191204#0/2_A_TACCTCACTTTCTTCTGCTTGGGTAACCGTGAGGAGGCTGCAAAAGCTGGGCTTGTAAGCGGAAAGGATCAAATCATTGACAGGAGCATCCAGGATGCAT	chromosome01	3725010	3725444	minus	AC	CT	2	0	0	0	2	null	null	cds-cds	null	null	null	null	null	null	null	null
Os01circ27018	HWI-ST620_0167:7:2201:18089:173385#0/2_A_GGTGAAGATGGAGGAGGAAAAACAGGCTCTTCAAAGGAAGCTACAATTAAAGCATCAGAGGGAACTTGAGAAAATGAAGATTCAGACTGCCTTCAGGGGT	chromosome01	37440778	37441526	minus	AC	CT	2	0	0	0	2	null	null	cds-cds OR 5utr-intergenic	chromosome01	37440778	-	Os01t0833800-02	null	null	null	null
Os01circ27053	HWI-ST620_0171:3:1105:17357:22826#0/1_A_CGGCGACCTTGAATAGATCATTGAGTTCCTTCTCGCGCGCCTTCTCAAGAGTCTCCTGGTCCCAGTCTTCCATGGTTTCTGCATCACGCTTGTCAGTGTA	chromosome01	37497776	37498578	plus	AG	GT	1	1	0	0	2	null	null	cds-cds	null	null	null	null	null	null	null	null
Os01circ27117	HWI-ST620_0177:6:1106:15296:58688#0/1_A_CACTTGTTTTTCATTTGAAAGTAAGACTTGTTGATAACATGAGGCTTCTCCAAGATCGCACTGCCCAAATACACTTGTTGACAAACTTTGACAGCACCTG	chromosome01	37559896	37562165	minus	AC	CT	0	0	1	1	2	null	null	intergenic-intergenic	null	null	null	null	null	null	null	null
Os01circ27407	HWI-ST620_0167:7:2308:16034:103532#0/1_A_CAACCATGAATCTTTTGAAGGTTTAGCATCGAGAGGCAATGCTTTGGCAGACTTGATTAACTGGACAAATTCTTCCATCTGGCTGCAAAATCACAGATAC	chromosome01	37872014	37873361	minus	AC	CT	2	0	0	0	2	null	null	cds-cds	chromosome01	37872014	-	Os01t0841800-01	null	null	null	null
Os01circ27482	HWI-ST620_0167:5:2205:8167:197143#0/2_A_CTTCATCATCGATGAGGACAACAGGTGGTTGACCTGGAGACCCTTCTCATCCATTGTGCTCAGTCTGTGGCCACTGATGACAGGCGCAGTGCAACTGAGC	chromosome01	37889647	37890713	plus	AG	GT	2	0	0	0	2	null	null	cds-cds	null	null	null	null	null	null	null	null
Os01circ27545	HWI-ST620_0177:6:2301:6767:113504#0/1_A_CCGCACTCGGACTTGCCAATGGTGTGATTCCTGTGTCACATTCCTTAGCATAGTGTAATCCATCTTCCATTGGTTATGTGGACATTAAGCACCGCTTTCA	chromosome01	38057605	38058310	minus	AC	CT	0	0	2	0	2	null	null	cds-3utr	chromosome01	38057605	-	Os01t0846000-01	chromosome01	38058310	-	Os01t0846000-01
Os01circ27817	HWI-ST620_0171:4:2303:3217:92301#0/1_A_CTGCGGTACTGATGTGCTGTGACAGTTCACTCGTTGCTGGGTTCTCCGCGCTCCAGCTTACAACGGAAGCAAGTGTTATTCACCGTGGATCGTTATCTAA	chromosome01	38400145	38401371	plus	AG	GT	1	1	0	0	2	null	null	intergenic-intergenic	null	null	null	null	null	null	null	null
Os01circ28196	HWI-ST620_0166:6:1206:1469:62796#0/2_A_CTTCATTGTTCCATTCCTATTATCGGAACGGATGAACAGCGATTTTTCTCATGGAAAAAAAAGTATGCGCGCGAGACTTTTCCTATCTTCTCTCACTTCA	chromosome01	38884348	38884471	minus	AC	CT	0	0	2	0	2	null	null	intergenic-intergenic	null	null	null	null	null	null	null	null
Os01circ28354	HWI-ST620_0167:6:1305:17175:191686#0/1_A_TGGTAGAATAGTGGTGGATGACAGAATTTCTCAGGTATATAAGAAGAGTAGCAGACAAACAATTGGATGAGCACCAAGTAACTTAATCTCCCCTAAAATT	chromosome01	39171704	39171958	minus	AC	CT	1	1	0	0	2	null	null	intron-intron OR 3utr-intergenic	null	null	null	null	null	null	null	null
Os01circ28961	HWI-ST620_0173:6:1204:6881:144930#0/1_A_CTTCACCTTTTTCATCAAACTCCCCAGCTTTTCTCTTAACCTTTCCCTCCATCCTGGTTCTCCAAGTTTTATCTTGTCCTCCTCTGGATTTTCAGAATTA	chromosome01	39577724	39580110	minus	AC	CT	2	0	0	0	2	null	null	cds-cds	null	null	null	null	null	null	null	null
Os01circ03563	HWI-ST620_0171:6:2101:2391:16298#0/2_A_CAACTCATCCTTTTATATCACGACGTTTTCTCATACCCAGAAGATGATAGCGTTGAAGATCCACTATTAGCGCAGCATTTGTCACATTTTGGTATTGATT	chromosome01	3988022	3988604	plus	AG	GT	0	0	0	2	2	null	null	cds-cds	chromosome01	3988022	+	Os01t0177200-01	chromosome01	3988604	+	Os01t0177200-01
Os01circ29348	HWI-ST620_0166:7:2306:10150:150186#0/2_A_CGCTGCAGCGCTACGGCGACGACACCTTCCGGTGGGCCCCGCCGCAGACCGAGCGCGACGGCTACTCGACGACACCATCGCCGTCAACAGCAACTACATC	chromosome01	39940707	39940819	plus	AG	GT	0	0	2	0	2	null	null	intergenic-intergenic	null	null	null	null	null	null	null	null
Os01circ29679	HWI-ST620_0167:5:1104:10990:176616#0/2_A_GGTGGGGGTGAACGCGGCGGTGAGCTCCCCGCCGGAGCAGAAGCCGGTGGTGGCGGGGCCGGCGTTCCCGGACGATCACCGGAGAAGGGGGAGAGAGATG	chromosome01	40129459	40131078	plus	AG	GT	1	1	0	0	2	null	null	intergenic-intergenic	null	null	null	null	null	null	null	null
Os01circ30051	HWI-ST620_0171:3:2206:5321:52689#0/1_A_CGGTCAGAGAAAATCGATAAAATGAAAAGAGTACTATAATTATTAAAAGTCAAATGATTTATCATAACTTGGAGCATCACTGGATGCTAAGAAGACAAGG	chromosome01	40641618	40642377	minus	AC	CT	0	1	0	1	2	null	null	intron-intron	null	null	null	null	null	null	null	null
Os01circ30246	HWI-ST620_0171:3:2204:19023:76758#0/1_A_CTCCTTTCATCAGCTGGTTCAACATAGTAGTCCTCCCCAGTGGCCTCAATATTGCCCTCGTACTCCTGGTCCAAACCACGGAGCTTGAGCACACGGCGAG	chromosome01	40699535	40704762	plus	AG	GT	0	2	0	0	2	null	null	intergenic-cds	null	null	null	null	chromosome01	40704762	+	Os01t0896800-01
Os01circ30247	HWI-ST620_0171:3:1106:11789:166199#0/2_A_GAAGGAACCGGCGACCCACAAGAGATACAACCTCAAGAAGCTGACCTACGAGCAGAGGAAGGCCAGTCTCGTCGAAAGATTGAATGCTCTCAACTCCTCC	chromosome01	40700393	40705638	plus	AG	GT	0	2	0	0	2	null	null	intergenic-cds	null	null	null	null	chromosome01	40705638	+	Os01t0896800-01
Os01circ30294	HWI-ST620_0167:6:2201:4863:144287#0/1_A_TGCGAGATCTGTATGTTGTTGGTAATCATATATACACTGAATAGCCAACACGGAGGGGGGTACAACAGAATCCTACCCAAGAAGCCTAGTAAACACAGAT	chromosome01	40755127	40755293	plus	AG	GT	1	1	0	0	2	null	null	intergenic-intergenic	null	null	null	null	null	null	null	null
Os01circ30917	HWI-ST620_0167:5:2104:14962:164339#0/2_A_GTCATATCCTCACTATGAAACTGCACAGAGTTCGAGCCCTGCTGTACCTTCTTCTACTTATGACAATCAGGTTACAAGGAGTGTAGACACTGCATCTGGG	chromosome01	41296342	41297223	minus	AC	CT	2	0	0	0	2	null	null	cds-cds	chromosome01	41296342	-	Os01t0908700-01	chromosome01	41297223	-	Os01t0908700-01
Os01circ30958	HWI-ST620_0177:6:1202:12345:39398#0/1_A_TCCCGAGCTTTTAGAGATTTGGCCTGGTGGAACCTCCTCATCAGATTCATCACCTTCAGAATCAGTGAATTTTCCCAAATTCTTTACTTGATAGCCACAA	chromosome01	41352252	41352999	minus	AC	CT	0	0	2	0	2	null	null	5utr-cds	chromosome01	41352252	-	Os01t0909500-03	chromosome01	41352999	-	Os01t0909500-03
Os01circ31127	HWI-ST620_0167:6:2304:6431:71070#0/1_A_CCTGGAACGTCTCCTTGACGACGTGCTGCTGCTGCACGCCGCCGCGGCCGAGGAAGCCGCCGGTGGGGGTCACGAATTTATTTTTCATACACCCCCCCTC	chromosome01	41412558	41412985	plus	AG	GT	1	1	0	0	2	null	null	intergenic-intergenic	null	null	null	null	null	null	null	null
Os01circ31131	HWI-ST620_0167:7:2102:6000:148854#0/2_A_CGTACGTATATGTGTGCCCGTACGTAGTCGTGGTGGTCGGTGACCCCCACCGGCGGCTTCCTCGGCCGCGGCGGCGTGCAGCAGCAGCACGTCGTCAAGG	chromosome01	41412698	41412994	minus	AC	CT	2	0	0	0	2	null	null	cds-cds	null	null	null	null	null	null	null	null
Os01circ31136	HWI-ST620_0177:7:2202:13673:140888#0/2_A_CGTACGTATATGTGTGCCCGTACGTAGTCGTGGTGGTCATGTGGTGGACTACTGCTCGGAGGAGGTGAGGTCGGTGACCCCCACCGGCGGCTTCCTCGGC	chromosome01	41412690	41413020	minus	AC	CT	1	0	1	0	2	null	null	cds-cds	null	null	null	null	null	null	null	null
Os01circ31137	HWI-ST620_0171:4:2201:19742:137743#0/2_A_CCACGGCAACGACTACCTGATGGTGCGCGAGACCAAGGTGGACTACTGCTCGGAGGAGGTGAGGTCGGTGACCCCCACCGGCGGCTTCCTCGGCCGCGGC	chromosome01	41412838	41413020	minus	AC	CT	1	1	0	0	2	null	null	cds-cds	null	null	null	null	null	null	null	null
Os01circ31145	HWI-ST620_0167:6:2201:14173:22645#0/2_A_GGTGCGCGAGACCAAGGTGGAGGAGGACTTCAACACCACCTCACCTCACTCCCCAACTAAAAAACAATGGCTCACTACCAGGAGGTGGACTACTGCTCGG	chromosome01	41412818	41413068	plus	AG	GT	2	0	0	0	2	null	null	intergenic-intergenic	null	null	null	null	null	null	null	null
Os01circ31198	HWI-ST620_0166:8:1302:15467:27637#0/2_A_CTCAAGAACTAGAAGCACTTGTATCTATGGTGGAGCACCTAAGGGACCACAAATACGTGACCTTAGGAGAGAACAAGGTGATGGCCCAATTGTTCTGATC	chromosome01	41420964	41421125	minus	AC	CT	0	0	2	0	2	null	null	cds-cds	chromosome01	41420964	-	Os01t0911100-01	chromosome01	41421125	-	Os01t0911100-01
Os01circ31209	HWI-ST620_0171:3:2201:7442:78210#0/1_A_GGCGTGGGCTCTACGAATCCACTCTTGGCTATTGCTTGCATACAGTAATCTGGGAAGTTGGCCTCAATAATTTGCTGTATGGAATGATTAGCTTTCAGAT	chromosome01	41420389	41421514	minus	AC	CT	1	1	0	0	2	null	null	cds-cds	null	null	null	null	null	null	null	null
Os01circ31421	HWI-ST620_0171:5:2104:5442:151329#0/1_A_TACGTTCATTTCAGTTGGGAAACGAAATGGGAGGGATTTAGTTTGGACAAAGCATCTCTCTGAGAAACAAATATGTGCTTCACTAACAGTTGGGAAACCC	chromosome01	41666512	41667012	minus	AC	CT	0	0	0	2	2	null	null	intron-intron	null	null	null	null	null	null	null	null
Os01circ03769	HWI-ST620_0166:8:1302:12762:165207#0/1_A_TGTCGTCGTCCTCGGGCTGCTCGCTCTCGGCCTTCTTGAATTCTCCATGGTTTGATTGGCGTTCCAGCCGACGAAGAGCATAGCGAAGTACATGGCGCCC	chromosome01	4167509	4167648	minus	AC	CT	0	0	2	0	2	Tc1/Mariner	null	cds-cds	chromosome01	4167509	-	Os01t0179800-01	chromosome01	4167648	-	Os01t0179800-01
Os01circ31749	HWI-ST620_0177:8:1204:8082:161258#0/1_A_GCCGGAGCGCCATCCTCGACGCCATCGATGAGGCCCCCGCCGCCGAGAGTGGAGGAGGTGTAGATGAATCCAAGATAAGGATTGTTCTCTGTCCTAGGGT	chromosome01	41877345	41880427	plus	AG	GT	1	1	0	0	2	null	Tc1/Mariner	intergenic-intergenic	null	null	null	null	null	null	null	null
Os01circ32080	HWI-ST620_0173:6:1108:8730:135595#0/1_A_TGCACCTCGCCGACCAGCTGCCGCAGCGCCGCCACCTGCAGATGCCACTGGAATTACTATCTTTGCAGGAGCCAGGGGAACTGATGGGTGGTGCCATTTT	chromosome01	42212831	42214938	minus	AC	CT	1	1	0	0	2	null	null	cds-cds	null	null	null	null	null	null	null	null
Os01circ32193	HWI-ST620_0167:4:1301:9256:80324#0/1_A_CCGGGTGAAGGATGGGATGGAGTTGGGGCTTTTGTCCAAGGTGTGGCATTACTTCAAAAAGTGGCCGGAAAGGAGAATCGTCTGGAGAATTAGCCAAACG	chromosome01	42255807	42256924	plus	AG	GT	2	0	0	0	2	null	null	intergenic-intergenic	null	null	null	null	null	null	null	null
Os01circ32356	HWI-ST620_0177:8:1105:8199:126959#0/1_A_TTGGGTTTGTTGGTCAGCTCGCTTATTACATGTCAGGTAAGAGGTGGAAGAAGTACCTCTCGCCGTCTCCCTCGCCTGGAAGGTCCCATGGATGGAGGCG	chromosome01	42341518	42341945	minus	AC	CT	0	2	0	0	2	PIF/Harbinger	null	intergenic-intergenic	null	null	null	null	null	null	null	null
Os01circ32427	HWI-ST620_0177:8:2308:15309:180145#0/1_A_GGGATCTTTATGTAGACATTGGGCCTGTCGACCACTTTGTGCAACCATTTTGCAGCTTCAGCATCCGAAACGTTTGCGTCGATTGTCCTCGAAACTGTGC	chromosome01	42379724	42380688	minus	AC	CT	0	2	0	0	2	null	null	cds-cds	null	null	null	null	null	null	null	null
Os01circ03854	HWI-ST620_0167:7:2305:15553:143716#0/2_A_GCTGTTCATTAGATCTGAATAAGGGGGATTGAAGCAGTGAGAAGAGAGAGAGAGAGCGCGAGGCCGGCGGTTCTAGAAGCTTCCAGACCCTTCGGCGCGA	chromosome01	4252922	4253472	plus	AG	GT	2	0	0	0	2	null	null	5utr-5utr	null	null	null	null	null	null	null	null
Os01circ03901	HWI-ST620_0166:6:2303:14592:105343#0/2_A_GACCAAAGGAGTGTATGTTGCTAAGCTTGAAGAACTTAAAAAGCTGTATGACAAGTACAATGATTTTGTGACTGCTGAAGACAAGGAAGCATTCATTGCT	chromosome01	4257097	4257243	plus	AG	GT	0	0	2	0	2	null	null	cds-cds	chromosome01	4257097	+	Os01t0180800-01	chromosome01	4257243	+	Os01t0180800-01
Os01circ32833	HWI-ST620_0173:6:1204:9153:163436#0/2_A_GGTTTTATTAACAGCAGATAGTAGGGAGATGTTCGGAGGGTCGCCGCCGGCGAGGGCGGACAACCCGCTCGTCCACGACCCGCACTTCCTGCTCAACCAG	chromosome01	42581964	42582403	plus	AG	GT	2	0	0	0	2	null	null	cds-3utr	null	null	null	null	null	null	null	null
Os01circ32950	HWI-ST620_0177:8:1205:14646:193332#0/1_A_GTTCTTGAGAGGTAGTTCCTTGTTTGGTCACTAGAAAGCCAGATATCCTCGTTAAATTGATAAGAAGTGCTTTCCCCAGAAGCAGCACCAGAATATCTAA	chromosome01	42686929	42687875	minus	AC	CT	0	2	0	0	2	null	null	intergenic-intergenic	null	null	null	null	null	null	null	null
Os01circ33027	HWI-ST620_0171:8:2201:15767:40724#0/1_A_GGGAAGAGAGCTCGTGGAGTCGGAGGTTGCGGGCGCCCGACTTGGTCCCCGCCGCGAAGCAGCCGTAGTCCTGGTTGAAGGAGATATGGAGGAGATCCTT	chromosome01	42739332	42739739	plus	AG	GT	0	2	0	0	2	null	Tc1/Mariner || PIF/Harbinger	intergenic-intergenic	null	null	null	null	null	null	null	null
Os01circ33221	HWI-ST620_0166:6:1303:15304:175611#0/2_A_GGCTTCTACATGATCGACGACGAGGGCGTGCAACGGCGTGGCCATCTTCACCTTCGACCAGCCGTCGGTGTTCGACTCGTCGGCAGAGCTCGGCGACATC	chromosome01	42956986	42957088	minus	AC	CT	0	0	2	0	2	null	Tc1/Mariner	intergenic-intergenic	null	null	null	null	null	null	null	null
Os01circ33405	HWI-ST620_0167:6:1102:20704:139989#0/2_A_CAATTCTTAGTCAGCCGCAGTTCAGGATATCATGGAGCAGCTATCTGCGAACAATTTTTGGTGTTTTTCGAGATCCCGGCGAGCGTGGATTCAGCACAAG	chromosome01	43285707	43286666	plus	AG	GT	1	1	0	0	2	null	null	5utr-cds	chromosome01	43285707	+	Os01t0944200-01	chromosome01	43286666	+	Os01t0944200-01
Os01circ04048	HWI-ST620_0166:6:2301:17939:19042#0/2_A_GTCTCATTGCTCTGGCAGAAGCTCATTGCATCTCCCGAAATGCAGATGTCTGCAGAAAAGGTTCTCAAACTCTCCTAAGATCTGTACTGTCAGAGAAGCA	chromosome01	4329954	4330072	minus	AC	CT	0	0	2	0	2	null	null	cds-cds	null	null	null	null	null	null	null	null
Os01circ04183	HWI-ST620_0167:7:1105:15149:127186#0/1_A_TCGGGACCATGAGCACATAGCATGGAAGCAATGCCTTGCGCAGTGGCATCAATAGTGGCTTCAGATGCAGGAACTTCCACGAGGTAAATACTCAAATACT	chromosome01	4331175	4331421	minus	AC	CT	2	0	0	0	2	null	null	cds-cds	null	null	null	null	chromosome01	4331421	-	Os01t0182600-02
Os01circ04194	HWI-ST620_0167:6:1206:12983:38383#0/1_A_GTGGAGGAAAAAGTAATGTCGGTTGGGAGAGTATTCGGAAAAGTAAAGCAGCAGACGTATCAGCAGCGATACCAGCTGCCTTTTGTACGATGATACATAG	chromosome01	4332220	4332365	minus	AC	CT	2	0	0	0	2	null	null	cds-cds	chromosome01	4332220	-	Os01t0182600-02	null	null	null	null
Os01circ04275	HWI-ST620_0167:4:2203:13975:63975#0/2_A_GGTGTGGTGGAGTCATGGGAAAATACGCACAAATTCTGGCCTATGTTGAGTACTTTGGCCAGTTTACAGCTGACAGTGAGCAATTCCCTGAAGATATAGC	chromosome01	4333928	4335254	plus	AG	GT	2	0	0	0	2	null	null	intergenic-intergenic	null	null	null	null	null	null	null	null
Os01circ04364	HWI-ST620_0171:7:2202:10270:200708#0/2_A_GGTAAAGGGATACCAGATTGGGAAGGCTGCTTACCTTGGGACTCTTCGCGACAAGAAATTGAAAGGGCAGCTCGCCGCAAGAGAGAAGCTCTATGGACAC	chromosome01	4397141	4400234	plus	AG	GT	0	2	0	0	2	null	null	cds-cds	null	null	null	null	null	null	null	null
Os01circ34056	HWI-ST620_0166:6:1204:17443:18332#0/2_A_TCTGAGCAACCAATGTTATGCCTCAACCTATACAAATGCCTGTCACCCGAGGCAAATCATTGAGGGGTGGGAGGAGCTTCGAGTAAATGGGCTTTATCAT	chromosome01	44155423	44156360	plus	AG	GT	0	0	2	0	2	null	null	5utr-cds	null	null	null	null	chromosome01	44156360	+	Os01t0961300-01
Os01circ34748	HWI-ST620_0167:5:1305:16660:59067#0/1_A_GGAGGAGACTATCGATCAAGATTGCAAGAAGCAGGAGCTTGGTGGTCAAGGGATTGGGGGTTGGGGAAGAAATGTTGTGCGATGAAATGAGCAGTCTCCG	chromosome01	44934700	44935120	plus	AG	GT	1	1	0	0	2	null	null	intergenic-intergenic	null	null	null	null	null	null	null	null
Os01circ04545	HWI-ST620_0167:5:1303:5552:62868#0/2_A_TGCAATTAATTCGTTTATTTGTGGAATTGGAATAACAAGAAGCTTGCAGAGATATTAGGTCCAAAGACAGATGCTGACAATGTAAAACCAGTGAAAAAGA	chromosome01	4515133	4517505	minus	AC	CT	2	0	0	0	2	null	null	cds-cds-acrossGene	chromosome01	4515133	-	Os01t0185200-03	null	null	null	null
Os01circ04768	HWI-ST620_0171:5:2102:12434:37882#0/1_A_CGGCTCCATTATTGACAATTACGTTAGACTTGGGTAGCATGTGAGCTGCACCCTGACGATAGCGAGCTTTTGCCCAGTTAGGCCGCATCATTCAGCATTT	chromosome01	4761028	4763508	minus	AC	CT	0	0	1	1	2	null	null	cds-3utr	chromosome01	4761028	-	Os01t0188900-01	chromosome01	4763508	-	Os01t0188900-01
Os01circ04830	HWI-ST620_0177:8:1306:8672:168495#0/1_A_TGGCGTTGGCGTCGGCGGCGGGGTCGCTCCACTGGTCGCCGATGTTGCCGATGATCACCATCCCCTTCTCCTCCTCCAGCTTCTTCCTCTCCCCCGACTT	chromosome01	4871478	4872220	plus	AG	GT	1	1	0	0	2	null	null	intergenic-intergenic	null	null	null	null	null	null	null	null
Os01circ04837	HWI-ST620_0167:7:1203:17681:132297#0/1_A_GGCGTAGGCGGCGGCCTCGTCGACGAAGACCTTAATATGAGCTCGTCCCAGGAGTCGAAGCCTTCCTTGATGAGATTGGTGGCGGTGGCGTTCCTCAGCT	chromosome01	4871916	4872274	minus	AC	CT	2	0	0	0	2	Tc1/Mariner	null	cds-cds	chromosome01	4871916	-	Os01t0191200-01	null	null	null	null
Os01circ05064	HWI-ST620_0171:5:1301:14131:45110#0/1_A_GTCCTGCCGCTTCAGCTGCTGGGCGCCGGTGGCCCGCCCAAGATGTACCAGCGACCCATCTACCGCCCCCAGGCGCCCGCCGCCAAGCGCCGCCGCGGCG	chromosome01	5131704	5131810	plus	AG	GT	0	0	0	2	2	null	Tc1/Mariner	intergenic-intergenic	null	null	null	null	null	null	null	null
Os01circ00904	HWI-ST620_0167:4:2208:8307:195071#0/2_A_CTATTTCAAACAGCAAGATACAAAGAACCGGACAGAATCGAGAAAGTACCAGCATATAAGGAAGCTCCTAGCCAAAAACCTGTGTTCTCTAGCAAAGAAA	chromosome01	516887	519034	plus	AG	GT	2	0	0	0	2	null	null	intergenic-intergenic	null	null	null	null	null	null	null	null
Os01circ05205	HWI-ST620_0167:7:1303:9655:174620#0/1_A_GTGATGAGTTAATCCCTTGTGTTGCTTATGCTTTCTTGTGACTTAACTTGCCGCACTTGAAGTCGGTGCAGGAGCAGCTGGTGCCGCACTTGCAGCCGCC	chromosome01	5477553	5478450	plus	AG	GT	2	0	0	0	2	Tc1/Mariner || PIF/Harbinger	null	5utr-3utr	null	null	null	null	null	null	null	null
Os01circ05259	HWI-ST620_0167:6:2305:19651:145588#0/1_A_GGTTGCTTCGTGACTTCACTTGCCGCACTTGCAGGCGGTGGGGTACATCACATGACACAAATTCATACGTTGATAAACGCATAGTCGCCGAAGCGACCAG	chromosome01	5478428	5478654	minus	AC	CT	2	0	0	0	2	PIF/Harbinger	null	intergenic-intergenic	null	null	null	null	null	null	null	null
Os01circ06328	HWI-ST620_0166:6:2106:6086:46530#0/2_A_CGCCGGGAGGCTGGAGGAGGCGTGGCGGGCGCAGCGGGTGTTCGACATGATGGCCTCCGGCGGCGCCGGCGGCGAGGCGGCGGTCAGGCCGAACCTGACG	chromosome01	7092682	7092813	plus	AG	GT	0	0	2	0	2	null	null	cds-cds	null	null	null	null	null	null	null	null
Os01circ06553	HWI-ST620_0167:6:2204:19772:29797#0/2_A_CTCACTTACGGTAATGGGAAATCAGCAGCAAGGGATGCTGGCATGGACTGGATCATTCATCTTGATACCGATGAGCTAATTCATCCAGCTGGTGCCCGGG	chromosome01	7352666	7353792	minus	AC	CT	1	1	0	0	2	null	null	cds-cds	null	null	null	null	chromosome01	7353792	-	Os01t0232800-01
Os01circ00133	HWI-ST620_0166:8:1106:16341:69609#0/1_A_CTACGGCGAGAAGAATGATGGTCACGAGTTGGCGACAATTTGCTTCCTTTATTTTTTGCTGTCCTTTTTATCACTGTTGCGATTCTTCTCTTGAGATCTG	chromosome01	75019	75133	minus	AC	CT	0	0	2	0	2	null	null	intergenic-intergenic	null	null	null	null	null	null	null	null
Os01circ06790	HWI-ST620_0166:7:2208:20254:124616#0/2_A_GTTTGATATCAAGTATCTCGACGATGATCATGAGTGGGTGATACATTGTCAGGTTCCGCTTCCCATGTTCCGGTAGCGTTACTGCATTGAAAGATGAAGT	chromosome01	7575281	7575410	plus	AG	GT	0	0	2	0	2	null	null	cds-cds	null	null	null	null	null	null	null	null
Os01circ06880	HWI-ST620_0171:7:1202:4508:127152#0/1_A_GGCGGCACCGCTCGCCGCCGGTGGCACAAGTCGACGGGTTGCATTGCCTCTTCTCATCGTGGAGACCGGCCGGAGCAGAGAGGAGAGGTTTTTTTTTTTT	chromosome01	7686183	7686329	minus	AC	CT	0	1	0	1	2	Tc1/Mariner	Tc1/Mariner	cds-3utr	null	null	null	null	null	null	null	null
Os01circ06988	HWI-ST620_0166:6:2204:18820:15120#0/2_A_CTTATTGTGTGCATTCCACCAGCAGTGATCATCGAATTTATTCCAAGAAAGCTATGACTGATATGGATAGCACCAATGTGTATGCTTATATCTCAATAAT	chromosome01	7718909	7719134	minus	AC	CT	0	0	2	0	2	null	null	cds-intron	null	null	null	null	null	null	null	null
Os01circ08048	HWI-ST620_0177:6:2307:3828:177925#0/2_A_CTATTTTGAGAGCCCTTGTGCTTTCCCTGAAATCAACTCATTCACTTATGAAACTGTCTCAACGTTCTGTTGCATTTACTTCGGGCTGGCTACTACCTCC	chromosome01	8705231	8705394	minus	AC	CT	0	0	2	0	2	null	null	5utr-5utr	chromosome01	8705231	-	Os01t0259600-01	chromosome01	8705394	-	Os01t0259600-01
Os01circ08528	HWI-ST620_0171:6:1303:9101:96740#0/2_A_CTCGATGGAGGCTCTTAGGGTTCTTGACATCACGCTCAGGCAGCACTCTGCTAAGCATTACAAGTTGAGCTGAGCTTGGATGGAGTCTCATGGTGACGAG	chromosome01	9626159	9627230	minus	AC	CT	0	0	0	2	2	Mutator	null	5utr-cds	null	null	null	null	null	null	null	null
Os01circ08575	HWI-ST620_0177:6:1103:14627:103814#0/1_A_CCCTGGTCTTGCATTTCCAGCATCAGATATATATGATACATCTCCTCCTGGTGGGTGGCCATGGTAAGTCCACCTGTATATTTTGGAAACTGATACTCGA	chromosome01	9646597	9648520	minus	AC	CT	1	0	1	0	2	null	null	cds-cds-acrossGene	chromosome01	9646597	-	Os01t0275900-00	chromosome01	9648520	-	Os01t0275950-00
Os01circ08668	HWI-ST620_0167:6:1105:14793:103645#0/2_A_TTATCAAGAGAGGAGTTAGGTCGTCTGGTAGCTTCCAGATGGACTGGAGAAAAGGTAGATTCTCAGGAAAATCATGAAACTGTGCAAGAAGATGAGAGCA	chromosome01	9704544	9707239	minus	AC	CT	1	1	0	0	2	null	null	cds-cds	null	null	null	null	null	null	null	null
Os01circ08810	HWI-ST620_0166:6:2103:16448:87376#0/1_A_GCCAAGTTGAAATCAGACAGCCCCTTGTTCAAGAACCTCAATTATCACATGCATGTCGAATTCTTTGGTGTCCAGACCAATCCCTTCATAGAATGTAGTA	chromosome01	9874226	9874754	plus	AG	GT	0	0	1	1	2	null	null	cds-cds	chromosome01	9874226	+	Os01t0279100-01	chromosome01	9874754	+	Os01t0279100-01
Os02circ10406	HWI-ST620_0167:4:2208:20182:166740#0/1_A_TTTCCAGCCTTTCCAGATTCCCGCGCTTGCGTTTCGCCTCTCGTCCAGCGCCTGAATCCCATTTTCTCTTCCCCACTTTAGATGCTGTTGGGCTCTGAAA	chromosome02	10013456	10014423	minus	AC	CT	1	1	0	0	2	null	null	ncRNA-ncRNA	null	null	null	null	null	null	null	null
Os02circ10422	HWI-ST620_0171:4:1301:20151:44162#0/1_A_GAGAGGAGGAAGGCGATGGGAGAGAGGAGGAAAGCCACCGCTCCCATCATCCAATTTTGGCCCCTGAGTTTTTCCTTTGGGGTCAGATCGTTTGACGGTT	chromosome02	10023042	10026767	plus	AG	GT	0	2	0	0	2	Tc1/Mariner || PIF/Harbinger	null	cds-3utr	null	null	null	null	null	null	null	null
Os02circ10653	HWI-ST620_0166:6:2302:7944:56802#0/2_A_CTCAGCAGCTTCATCCCAAGGCACTCCGTGTAGAACTGTAGGTGAGCTCGACGACGAAGTGGTTGTCCTCCGCGCCATAGCCGAGGAAGGCGTTGGTGTA	chromosome02	10408992	10409116	minus	AC	CT	0	0	2	0	2	null	null	intergenic-intergenic	null	null	null	null	null	null	null	null
Os02circ10761	HWI-ST620_0166:7:1108:7104:32878#0/2_A_GACAACTCTGGTGGATTCAATGTTAAGGCAAGCCAAGCTTGGAAGAGTGGTCAAGCAACTAGAAGAGATGTGAGGAATATAGCAATTGTTGCTCATGTCG	chromosome02	10769468	10769577	plus	AG	GT	0	0	2	0	2	null	null	cds-cds	chromosome02	10769468	+	Os02t0285800-01	chromosome02	10769577	+	Os02t0285800-01
Os02circ10778	HWI-ST620_0167:5:1103:21218:99853#0/1_A_CGATGATGTTGATTTTAGTACCCTTATAAGTTATCGAAGTGTTTTTGCTAAGTATAGTGATTCCCCTCTTTACCGACAAAAGGTGAAGTGTTGATGGAAA	chromosome02	10769856	10772185	plus	AG	GT	1	1	0	0	2	null	null	cds-cds	null	null	null	null	chromosome02	10772185	+	Os02t0285800-01
Os02circ02291	HWI-ST620_0167:6:1207:2911:32962#0/1_A_CAGGGGGAAATGATCTTAGATGTTGTCCATTCATCCATTTTAATTTTACAGCATCAAAGACTGCTTAATGTAGCATGGAGGGGATACGACAACAGGTTTG	chromosome02	1091538	1092961	minus	AC	CT	2	0	0	0	2	null	null	cds-cds	chromosome02	1091538	-	Os02t0121000-01	null	null	null	null
Os02circ02448	HWI-ST620_0173:6:1102:12875:154273#0/2_A_GACACATGATAAGGAGTGGCTCCTCCTCTTCCTCCTCTCCTACTGCTGCTGCTGCTGCTGCTGTGTAGGCCTATGGTAAGTGTGGAGGAGAGGAGAGAAA	chromosome02	1131176	1131373	minus	AC	CT	1	0	0	1	2	null	null	intron-cds	chromosome02	1131176	-	Os02t0121500-01	null	null	null	null
Os02circ11139	HWI-ST620_0171:8:2105:18394:67301#0/1_A_GGGCGATGTAGGTGAGCTCGATGGCCATGCCGGTGCCGTTGATGGTGATTAGATTAGCTAATTAATTTGAGACATGTAGTAATATCCCTTTGGGACGGCT	chromosome02	11621585	11624335	plus	AG	GT	0	2	0	0	2	null	null	intergenic-intergenic	null	null	null	null	null	null	null	null
Os02circ11383	HWI-ST620_0173:6:1103:9583:23610#0/1_A_TTGGTGAATTCCGGTGCAGAGGAGGAGGTCGCGTGACAAATGATCTGCCACAGCACGTCGCGCGGCGGGGAGGCCGACGCCGGCGGGGTAGCAGTTGAAG	chromosome02	12029250	12031517	plus	AG	GT	2	0	0	0	2	null	PIF/Harbinger	intergenic-intergenic	null	null	null	null	null	null	null	null
Os02circ00286	HWI-ST620_0167:5:2305:6526:62579#0/1_A_CCACCTGCTGCGGCAGCTGCTGGTACCCCATGCATCCGCACAGCAGGTAGAACACGCTCGTCACCACCACGCTGATCCCCGTCGCCTTCCGCATCGTCCT	chromosome02	119862	120997	plus	AG	GT	1	1	0	0	2	null	null	cds-cds	null	null	null	null	null	null	null	null
Os02circ11523	HWI-ST620_0166:6:1104:11829:137718#0/2_A_CGCCAGCACCGTCAGCCCGTCGCCGTTCCGGTCGTTCTCCGCCTGCGCCTGCGCGTCCATCTGGTTGAGCGTCCCCGGCCGGAGCCGCCCGAACGCGGCG	chromosome02	12157865	12157972	plus	AG	GT	0	0	2	0	2	null	null	intergenic-intergenic	null	null	null	null	null	null	null	null
Os02circ11584	HWI-ST620_0173:6:1304:5307:18803#0/2_A_GGTGGCCGGTTGGCTTTGGCAAGAAGGCTGTGCACATGGTGAAACATGCGGGGAACAAAACAGCTCATAATCTGAAGAACATGTTCAGCAGGAAAGGCAG	chromosome02	12427139	12427743	minus	AC	CT	2	0	0	0	2	null	null	cds-intergenic	null	null	null	null	null	null	null	null
Os02circ11620	HWI-ST620_0166:7:1202:14404:43234#0/1_A_GCACTGGCAAATCCTATAACTGATTTGTCTGTAGCATCATCTTCACTGCTACTGCTATCTGAACTGTCCATATATTCACTGCTGTTGTTGCTGATTAATT	chromosome02	12475982	12477307	plus	AG	GT	0	0	2	0	2	PIF/Harbinger	null	cds-3utr	chromosome02	12475982	+	Os02t0314300-00	null	null	null	null
Os02circ11657	HWI-ST620_0171:5:1105:7011:12243#0/2_A_GCCCACGTCAATTTCTGATGATCGAAGACAGAAAAGGATTATTCACATATTAAAGCTTGGCAAACGTCTTGGGGGAAAGTACAACAATTCGAAAGAGCTC	chromosome02	12604702	12605599	plus	AG	GT	0	0	0	2	2	self-complementation	self-complementation	cds-cds	chromosome02	12604702	+	Os02t0316900-02	chromosome02	12605599	+	Os02t0316900-02
Os02circ11861	HWI-ST620_0166:7:2207:11875:189776#0/1_A_CAAGCCCCTAGAGCCCGGGTCTGTAAACTCAAATTGCTTTGTCCAGCCATCTTGGAGGTCTCAATGAAGGCTTTATTCCGAGCTTAGTCAGGAATATTGT	chromosome02	13149192	13149644	minus	AC	CT	0	0	2	0	2	PIF/Harbinger	null	cds-3utr	null	null	null	null	chromosome02	13149644	-	Os02t0326000-02
Os02circ02759	HWI-ST620_0171:5:2201:2749:143510#0/2_A_CTACAGATGGCGAAATATCAGACTGCAGACTTCTCTTTATGTTCTCCACAGATTTTATGCCTGCAGGGTTCTCCAGATGGACCTGAACAGTACGCACATT	chromosome02	1347811	1350024	minus	AC	CT	0	0	0	2	2	null	null	cds-3utr	chromosome02	1347811	-	Os02t0125800-01	chromosome02	1350024	-	Os02t0125800-01
Os02circ00022	HWI-ST620_0166:6:1205:20968:72730#0/1_A_CGTATTCATCGTCGATGTCATCCATGGAGGACGGCTTTTGCGGAGGGTCCTGATGGTCAGATTCGACAATGTCTCCTTCAAGTTCAAGATCGGACTCGAC	chromosome02	14379	14549	plus	AG	GT	0	0	2	0	2	null	null	cds-cds	chromosome02	14379	+	Os02t0100300-01	chromosome02	14549	+	Os02t0100300-01
Os02circ12315	HWI-ST620_0167:4:2305:17847:129332#0/1_A_TCTTGTATAACGGATTTCTTCCGGACATGTCATTCAGGAACATCCCAATGCCTCATTGATGCAAACACTGTAGATATGCGAGTAGCCATTGTGTTCAAAC	chromosome02	15702405	15704204	minus	AC	CT	1	0	1	0	2	null	PIF/Harbinger || hAT	5utr-cds	chromosome02	15702405	-	Os02t0452500-01	chromosome02	15704204	-	Os02t0452500-01
Os02circ03041	HWI-ST620_0171:7:2101:3437:138666#0/2_A_GATATTCAGCATTCGCTGGAACAAGATTCAATTGAAGCAAAGGAAATTGAAGCCACTGAAACTGAAGAAATCACCCACCAACCCCCTGCTGCTGTTTCCA	chromosome02	1620454	1620603	plus	AG	GT	0	1	0	1	2	null	null	intergenic-intergenic	null	null	null	null	null	null	null	null
Os02circ12500	HWI-ST620_0171:5:1106:12957:2106#0/1_A_GGAACTCGAAGATACAAAATCGATGCATAGCTCTTTATATTCTCTCCCAGATTTTCTGTTAGCAGAATTGCCACCATAACCTATTCGATGGCAATTATCA	chromosome02	16618471	16620288	plus	AG	GT	0	0	0	2	2	null	null	cds-cds	chromosome02	16618471	+	Os02t0469300-02	chromosome02	16620288	+	Os02t0469300-02
Os02circ12602	HWI-ST620_0167:5:2307:12507:43952#0/1_A_CGTGCGGAGGCCGAGGTAGGCCCGGCGGAACTCGGCCGGGGTGAGGTGTGGATGGCAGACACGGGGGAGACCATAGAATCCACGCCACATTTGTTGCGGA	chromosome02	16639932	16642875	minus	AC	CT	2	0	0	0	2	null	null	intergenic-intergenic	null	null	null	null	null	null	null	null
Os02circ12997	HWI-ST620_0167:5:1305:19762:190222#0/2_A_CGGCCACTTGGTGATAAATCAGTGAGGAGGAGGAGGAATGCGCGTCATGTACCCAGGATTCCACCGTCTCTCCGCCGGTGAGCGAATGCGGCGACAGGAC	chromosome02	18194963	18195741	plus	AG	GT	1	1	0	0	2	null	null	cds-cds	null	null	null	null	null	null	null	null
Os02circ13055	HWI-ST620_0171:3:2103:10404:191489#0/1_A_CTCAGGAACTGATTGTTCCTCTTCCACAGCCCCACCCTCCACTATAATTGCCACGGCCTCTCATCCCGTCAGCTCTGAAGTTGTTATTACCTCTTCCTGG	chromosome02	18258986	18262616	minus	AC	CT	1	1	0	0	2	null	null	cds-cds	null	null	null	null	null	null	null	null
Os02circ00507	HWI-ST620_0166:6:1307:15818:97292#0/2_A_GTGCCACGTCTCACCGGGGGCGTCGTCGCCGGTGATCCTCGTGTTCAGGAGGCACCGCCCCGTGTACGCTGCCCCTCGCGGTAGGGGATCTCGCCGTCGG	chromosome02	184807	184919	minus	AC	CT	0	0	2	0	2	null	Mutator	cds-cds	null	null	null	null	null	null	null	null
Os02circ00517	HWI-ST620_0167:6:2204:5793:138331#0/2_A_CATCGGGGACTTCGCCGACTCCAAGACGGTATCGAAGAAGCAGGTGGATGGCGTGGTGACGAACAAGTACAGGCCCAAGGAGCCGTACACGGGGCGGTGC	chromosome02	184698	184973	minus	AC	CT	2	0	0	0	2	null	Mutator	cds-cds	chromosome02	184698	-	Os02t0103800-02	null	null	null	null
Os02circ00537	HWI-ST620_0166:8:2101:11452:52716#0/1_A_GGTAGAATACGGAGCAGGTCGACGGCCTCGGAGCTCCCCCGGCTACGGCGGCGCCAGCTTTCGCCATTACCGCTGCTTCGCTTGGACCAGCAACGAGGAG	chromosome02	185046	185145	minus	AC	CT	0	0	2	0	2	null	Mutator	cds-cds	null	null	null	null	null	null	null	null
Os02circ13620	HWI-ST620_0173:6:2107:15843:174625#0/2_A_CTTACTTCGAGAGGTTCAATGGATTTTGATAAAAGTGATCAGACTACTTCACCAAAGCCAATCAAAGAAAACAAGCAGGAAGAGGCGAAATCAAGGCCCT	chromosome02	19325535	19329628	minus	AC	CT	2	0	0	0	2	null	null	5utr-intron	null	null	null	null	null	null	null	null
Os02circ13853	HWI-ST620_0166:7:2208:9346:124679#0/2_A_CACATATCAACCACCATGTTGGGGCCACAGCCAGAGCACCCTCCTTTGATGCCCACTGGCAACCAGCCACAACGGAATCCTTGATTTCATTCAGATACTG	chromosome02	19747940	19748049	minus	AC	CT	0	0	2	0	2	null	null	intergenic-intergenic	null	null	null	null	null	null	null	null
Os02circ13957	HWI-ST620_0171:4:1206:8960:67262#0/1_A_GAGGCACCAAGCGCATAATGATAACTGACTCTTAATGCTGGGTACTGCAACATGCGCTTCCATCACTTTATTTTCTCTATCAGCTTCTCAAATGCCTGCA	chromosome02	19888027	19889022	plus	AG	GT	0	2	0	0	2	null	null	cds-3utr	null	null	null	null	null	null	null	null
Os02circ14311	HWI-ST620_0166:6:1106:19791:147783#0/2_A_TTTAAAAGTCTGGTTACAACCCTTCTTATCCCCATTATTTTAGGAAAGCTCTAATTGCTGGGATTGCTCTGGCCCTCATGGATCCTACACTCGGATGCCT	chromosome02	20377619	20379294	plus	AG	GT	0	0	1	1	2	null	null	cds-cds	chromosome02	20377619	+	Os02t0531200-01	chromosome02	20379294	+	Os02t0531200-01
Os02circ14543	HWI-ST620_0167:7:2205:12460:67325#0/1_A_CTTCAGTCTCCCATGCAGTCCCGTATATTCTTTGTAGAATTTGATTACTTTCGTCACCAGCATCTTCCTGTATGGAGAATAGATCAAGATCCAGACCTAA	chromosome02	20753451	20754177	minus	AC	CT	2	0	0	0	2	null	null	cds-cds	null	null	null	null	null	null	null	null
Os02circ14598	HWI-ST620_0167:5:2101:8612:115991#0/2_A_CTTGCAAGGATTCAAGTTGGATGTATATGGAAGTGGCGAGGACTCACAAGAAGTCCAATCTACCGCCAAGAAACTGAACCAGAGCATCTGAACTGGTATC	chromosome02	20802905	20803457	minus	AC	CT	1	1	0	0	2	null	null	intergenic-intergenic	null	null	null	null	null	null	null	null
Os02circ14671	HWI-ST620_0173:6:1205:15903:7651#0/2_A_TGCCCAGAGAATACAGAGGGAGAGGCTAAAGAAAATCCCTGGAAATGAGTCACGTGTAATGAAGATGTTAAATCGCCTTACTGAGCTTGGTCCAAAAATT	chromosome02	20837710	20839435	plus	AG	GT	2	0	0	0	2	null	null	intergenic-cds	null	null	null	null	chromosome02	20839435	+	Os02t0539600-01
Os02circ14782	HWI-ST620_0167:5:1105:6977:146689#0/2_A_GTCTTTCTAGCAATGTTGAATATCTGGCATCAAGAGATGCGACGATCATGGGAGCGTCGGGAACGGCCTGGTCGACCTGGGTGGCGCAGCCGTGGCCGTG	chromosome02	20936120	20938822	plus	AG	GT	2	0	0	0	2	null	null	cds-intergenic	null	null	null	null	null	null	null	null
Os02circ14837	HWI-ST620_0171:7:2104:20199:120713#0/1_A_GTGCTTCTTCTCCTTGTCGTAGTCCACCACGCCGGAGCTCTCGTGGAGAGCGTAGGCGCCGGCGGCGATGGCGCCGAGGCCGCCGAGCTGCTCGAGGTGC	chromosome02	20993244	20993348	minus	AC	CT	0	1	0	1	2	null	null	cds-cds OR intergenic-intron	chromosome02	20993244	-	Os02t0543000-01	null	null	null	null
Os02circ14858	HWI-ST620_0166:6:2207:5350:6044#0/2_A_GAATAAATTAGAGAAACAAGTTGAAGAGCTAACTTGGCGGCTTCAGCTGGAGAAACGCATGAGGGGAGTGCTAGAGGCAATAAGAATAAGCTGCCTAGGG	chromosome02	21207826	21210225	plus	AG	GT	0	0	2	0	2	null	null	cds-3utr	chromosome02	21207826	+	Os02t0544951-00	chromosome02	21210225	+	Os02t0544951-00
Os02circ14931	HWI-ST620_0171:3:2104:7603:106100#0/1_A_GTTGGTGTTGGTGGGGGAAAGAGAAGAGGTGCGCGTAGCCGTCGAAGAGGAAGGAGGGCTTGGCCTTGGGGTTGATCCCGGTGCTGATGATGACGGCGAT	chromosome02	21514369	21514776	plus	AG	GT	0	2	0	0	2	null	Tc1/Mariner || PIF/Harbinger	intergenic-intergenic	null	null	null	null	null	null	null	null
Os02circ15070	HWI-ST620_0177:7:1104:19245:105170#0/2_A_TCCCGAGCAGAGACGTCAAGAAGGCCAGCCCTCCGATCAAGAGCATGATAAACACGCAAATCTTAGCACAGGCAGAACAACTCAAAACACTCGTCAGAGG	chromosome02	21695543	21695667	plus	AG	GT	0	0	2	0	2	Mutator	null	intergenic-intergenic	null	null	null	null	null	null	null	null
Os02circ15106	HWI-ST620_0166:7:2304:16918:152613#0/1_A_TCAGCGTAGTCTTTAAAGAATGCCTCCTGATCCTCTGCATATTTTTCGGCATATACCTTTCCGTAGGAGTATTTCGCAGCGACGAAGGGCTCTGGTTGCG	chromosome02	21695846	21696677	minus	AC	CT	0	0	2	0	2	null	null	cds-cds	chromosome02	21695846	-	Os02t0553200-01	chromosome02	21696677	-	Os02t0553200-01
Os02circ15853	HWI-ST620_0166:7:1103:12748:3383#0/2_A_TGCTGCTAGTGCTTTTCTGACGACAGGTGGTGTAAGATTGTTCCCAACAGATCTGAGGGGTGTTGTTACCATGGAAAAAGATTGAAGCTTCTGCAATTAT	chromosome02	22321058	22325960	minus	AC	CT	0	0	2	0	2	null	null	intergenic-intergenic	null	null	null	null	null	null	null	null
Os02circ16170	HWI-ST620_0177:7:1307:7561:28143#0/2_A_GGAATGGCGTCCTACAAGGGAAAGCTGTATGTTCCTCAAAGTTTGTACTCATGGCCATTCAACAGCTTTCTTGGCTGATGTTCTGAAGCCTATCGCCACT	chromosome02	22889485	22889584	minus	AC	CT	0	0	2	0	2	null	null	intergenic-intergenic	null	null	null	null	null	null	null	null
Os02circ16521	HWI-ST620_0173:6:2308:19095:178001#0/2_A_GATTTCCCTGCGACGGTGCACAGATACAGAGATGCTGCACCTTCCTCCCTTGCAGATATCAAGAAGTTTGCTAATGCTGTTTCAGTCCGCACAACGTCCA	chromosome02	23518265	23518564	plus	AG	GT	2	0	0	0	2	null	null	cds-cds	null	null	null	null	chromosome02	23518564	+	Os02t0588500-02
Os02circ16605	HWI-ST620_0166:6:1304:12688:17577#0/1_A_CTCCGAAAGCTGGAGTAACAGGCACGCGCGACCGAGCCCGGCTCCCCCCTTCCAGGGCACGCCGGCGCGCGTCCGATTTAGGGAGGGAGAGTTTCGTTTC	chromosome02	23725269	23725436	plus	AG	GT	0	0	2	0	2	null	null	intergenic-intergenic	null	null	null	null	null	null	null	null
Os02circ16849	HWI-ST620_0171:1:2306:1796:110458#0/2_A_TTGATGTTCCCTCCAGTTCAACTGCTGCTGCTTTTGTGCCTGTCTTTGATGAGCCTGCGACTGAACCTGACCACCAGATTGACGAGCCCAAGAATCCTGA	chromosome02	23809647	23809808	plus	AG	GT	0	0	0	2	2	null	null	intergenic-intergenic	null	null	null	null	null	null	null	null
Os02circ16855	HWI-ST620_0177:8:2206:10872:171747#0/1_A_GTGATATTGCTTTCTGGGGGCAAATTCAAGTTTATAGCGGCAGTCCTCAAAGCCCATTTCCTGCAACTCCTCCAGGAGAGGGTCCCATTCGCTGACGCCA	chromosome02	23809387	23809963	minus	AC	CT	0	2	0	0	2	null	null	cds-cds OR 3utr-3utr	chromosome02	23809387	-	Os02t0593700-01	null	null	null	null
Os02circ16859	HWI-ST620_0167:6:2202:4389:127609#0/1_A_GGGCAAATTCAAGTTTATAGCGGCAGTCCTGTTGTTACTGACAAAAGAAGGATCCTCCACAGAGATCATCGACAGACTGCTCCAGGTTGTACTTGTTCTG	chromosome02	23809434	23809986	minus	AC	CT	1	1	0	0	2	null	null	cds-cds OR 3utr-3utr	null	null	null	null	chromosome02	23809986	-	Os02t0593700-01
Os02circ16929	HWI-ST620_0167:7:2105:16265:200135#0/1_A_TAGTGGGTCTTCAGTGGTGGTGGACCTGAGAGGTATATTATCTGAAACCTGCTGTTTGGCCTGAGGTGCTGCAGGAACCATCAGCATGCCCATTAGATGG	chromosome02	23811725	23812001	plus	AG	GT	1	1	0	0	2	null	null	intergenic-intergenic	null	null	null	null	null	null	null	null
Os02circ17539	HWI-ST620_0167:4:1302:5352:23568#0/1_A_TTTTCTTTTTCCTCCTCTCGAGTCGAGCCGTCTCCACCCTGGCTGAGAATCCCCTGTGCCTTAACAATCACATCAGCATAACGACTCCTAAGGAGGGCTG	chromosome02	24377488	24381223	minus	AC	CT	2	0	0	0	2	null	null	intron-intron OR 5utr-intergenic	null	null	null	null	null	null	null	null
Os02circ17568	HWI-ST620_0167:4:2308:8564:200348#0/2_A_CCCTGAGTGTACACGGTCCCCACGTAGGTGCTGGTGTATAACTCAGTGAGAAGCTCCTCAAGGTCATCTGACTCGGGGGTATTACAGGGTAGTGCAAACC	chromosome02	24390495	24390712	plus	AG	GT	2	0	0	0	2	null	null	cds-cds	null	null	null	null	null	null	null	null
Os02circ17587	HWI-ST620_0167:5:2104:4622:68778#0/1_A_CCCGAGTCAGATGACCTTGAGGAGCTTCTCACTGAGTTATACACCAGCACCTAAAAGTAATTCTGGAGCCCTGTACCACAAAGTCACAACCAACTGGGTG	chromosome02	24390495	24391458	plus	AG	GT	2	0	0	0	2	null	null	cds-cds	null	null	null	null	null	null	null	null
Os02circ17709	HWI-ST620_0171:5:2205:20046:185252#0/1_A_GGGAATTCTATGTGATGGATTACAGGGAAGTTCAAACCGTTGGTTTCTAAGTACTCAAATAACCTTGCCAACATAAAGGTCGATCTTCCCAGGAGCACCT	chromosome02	24480919	24481766	minus	AC	CT	0	0	1	1	2	null	null	cds-cds	chromosome02	24480919	-	Os02t0603800-02	chromosome02	24481766	-	Os02t0603800-02
Os02circ17933	HWI-ST620_0167:5:2203:2993:116430#0/2_A_GTCGGACAAGGCTGCTGAGGTTGATGAAGAAGAAAAGGCCAAACTCAAAGAACCAAAGGCTGCTGAAGAAGATTTGGCTTTGAAGGAAATGACTGGTCCT	chromosome02	24695311	24695931	minus	AC	CT	1	1	0	0	2	null	null	cds-cds	null	null	null	null	null	null	null	null
Os02circ18082	HWI-ST620_0166:6:2103:2359:100423#0/2_A_CCTGCTGTAGCTGCGCCTCTTTGGAGAACGATCCCGTGGGCTTCTACCATAGCTTGGGCTCCTCCGGAGGTGGAGGTGATCGGCTGTAGCTTCGTGCACG	chromosome02	24819892	24820658	plus	AG	GT	0	0	2	0	2	null	null	intergenic-intergenic	null	null	null	null	null	null	null	null
Os02circ18385	HWI-ST620_0166:8:2105:18370:50116#0/1_A_TTCGCTTCTTGAGCAGCTCCTTCAATCTTGTGAAGTTACAATAAGGCGGCAGTCTCGATTCCCGACCTGAAACTTTCTGCTTTTGATGCACAGACCCGTG	chromosome02	25013688	25013791	minus	AC	CT	0	0	2	0	2	null	null	intergenic-intergenic	null	null	null	null	null	null	null	null
Os02circ18447	HWI-ST620_0171:2:1301:4543:78887#0/1_A_TTTCTCTCTGCTTTGTTTGCTGGTGCCATACTTTCTTATCATGTAGAGTACAATCCGATCAGAAAAAAAAAGAATAAATCAGATCGTGGTCTTCTCAATG	chromosome02	25097387	25099880	minus	AC	CT	0	0	1	1	2	null	null	5utr-3utr OR 3utr-intergenic	null	null	null	null	chromosome02	25099880	-	Os02t0614500-01
Os02circ18448	HWI-ST620_0171:1:1303:1479:138892#0/1_A_TGGTGCCATACTTTCTTATCATGTAGAGTACAATCCGATCGTAACTATTGTTGGGTAATTGAAAGTATCAACTCTTCTATTGGTCAGCCAGAAGTCCACA	chromosome02	25098518	25099880	minus	AC	CT	0	0	0	2	2	null	null	5utr-cds OR 3utr-3utr	chromosome02	25098518	-	Os02t0614500-01	chromosome02	25099880	-	Os02t0614500-01
Os02circ18731	HWI-ST620_0166:7:2201:1631:4289#0/2_A_GTCGAGAGTAACTTTCCACACCAGATATTTCAAGTGATTGATGCTCGACTCGCAGAAAAGTCCATGGCAGGAAAAAGACCGACTGATCCTATGTTCAAAG	chromosome02	25180815	25180937	minus	AC	CT	0	0	2	0	2	null	null	intergenic-intergenic	null	null	null	null	null	null	null	null
Os02circ18793	HWI-ST620_0177:7:2307:16663:177529#0/2_A_TGATGGCGGGATTGCGCCGGTGAGCCTGTTGTTGGCGAGGGCCAGGTAGCTTAACTTGGAGAAACCGATGTTCACCGAGCTGGTTGTTCAGGAGGAGCAC	chromosome02	25200539	25200668	minus	AC	CT	0	0	2	0	2	null	null	intergenic-intergenic	null	null	null	null	null	null	null	null
Os02circ18880	HWI-ST620_0166:6:2204:6097:158721#0/2_A_GCCGGAGCTGCCAACGCTGCGGCGGCGCCGGCGGACAGGGTGGTCAAGGACTACTCCAGCTAGGCGTGCCCGGCGGCGAGCGCCACCCACGTGGCGTGCC	chromosome02	25201030	25201131	plus	AG	GT	0	0	2	0	2	null	PIF/Harbinger	cds-cds OR intron-intergenic	null	null	null	null	null	null	null	null
Os02circ18975	HWI-ST620_0166:6:2307:2844:107746#0/2_A_GTCGACCGCGGCATCGAGTTCGACCAGGTCGACCGCGAGCGAGGCTGGGATGACCAGATCCGCCTCTCCCGCTACCAGACCGCCCGCAGCAAGCACCGCA	chromosome02	25550357	25550559	minus	AC	CT	0	0	2	0	2	PIF/Harbinger	null	cds-cds	null	null	null	null	null	null	null	null
Os02circ19067	HWI-ST620_0171:6:1302:11673:90380#0/1_A_GGTTATAAATGGTCTTGCTTCAGCACCACCTGCTGCTCCCTGATCAATTGGGTCTGTGAGCTCAGAAAATGCATTACCAATCTCACGACCACATATGAAA	chromosome02	25705612	25710683	minus	AC	CT	0	0	1	1	2	null	null	cds-cds	chromosome02	25705612	-	Os02t0623500-01	chromosome02	25710683	-	Os02t0623500-01
Os02circ19128	HWI-ST620_0171:8:1204:20098:103057#0/1_A_CAAGTTCTTACATATACACCATCTGGGTCATACTTTTGACTTTAAATTATGATCCTTGCTGCTAGCATGGGGCACTCTTTGATCAATGGGCAAAGCACAT	chromosome02	25776344	25776725	plus	AG	GT	0	2	0	0	2	null	null	cds-cds	null	null	null	null	null	null	null	null
Os02circ19131	HWI-ST620_0171:6:2104:3198:31393#0/1_A_CTTGCTGCTAGCATGGGGCACTCTTTGATCAATGGGCAAAGCACATGGAGATCTGAAGATGAATAAGATGGGACATGAAATGCAGTCTCACAAAAGGATC	chromosome02	25776660	25776883	minus	AC	CT	0	0	0	2	2	null	null	intergenic-intergenic	null	null	null	null	null	null	null	null
Os02circ19493	HWI-ST620_0166:8:1208:8055:65255#0/2_A_CATCCTCGGCATCGCCTGGGCCTTCGGCGGCATGATCTTCATCCTCGTCTACTGCACCGCCGGCATAAGCACCAGTCGGACGCCACCGTCAACACCACCG	chromosome02	26019136	26019257	minus	AC	CT	0	0	2	0	2	null	null	intergenic-intergenic	null	null	null	null	null	null	null	null
Os02circ04366	HWI-ST620_0166:8:2301:2806:90391#0/2_A_GCAAACTGGCGTGTCATCAGAAATGTTTGGAGCCTCCTTTTGATAAAAACAATATGTTCAAGGTGCAAATCCCACGAGTCATTTCCTGACAATAACATTA	chromosome02	2622694	2622811	plus	AG	GT	0	0	2	0	2	null	null	cds-cds	chromosome02	2622694	+	Os02t0147800-01	chromosome02	2622811	+	Os02t0147800-01
Os02circ04389	HWI-ST620_0177:8:2107:1821:162675#0/1_A_GGGTTAGAGAGAGAAAGAGAGAGAGAGAGATGTGGGGAACTGGAGGAGGGAGGAGGAAGAAAGGGTTCAACTCCAAGAACACCTTGGAAAAGATGAGGGA	chromosome02	2638418	2638727	minus	AC	CT	0	2	0	0	2	null	null	intergenic-intergenic	null	null	null	null	null	null	null	null
Os02circ19797	HWI-ST620_0177:7:2106:9841:154280#0/1_A_GCAAGGTTTCGGTTGCAAGAGCAAGAACCATTTTCTGATAATTCATCCTCAACAACAGCACCTGGGTGTTCCCACGCAAGCATCATATCAAACATTAAAC	chromosome02	26428749	26428989	minus	AC	CT	0	0	2	0	2	null	null	5utr-cds OR cds-intergenic	chromosome02	26428749	-	Os02t0637800-02	chromosome02	26428989	-	Os02t0637800-02
Os02circ04511	HWI-ST620_0171:7:1202:13347:23247#0/2_A_CAGGCTCACTTTTTTTTCTTCTTCTAAAAGCCTACGGCGATTATTGCACGCACAAACAGTAGTAAAGGTCAGTTTATGACTGAGTATGTTGTCACCCGCT	chromosome02	2643236	2643881	plus	AG	GT	0	2	0	0	2	null	null	intergenic-intergenic	null	null	null	null	null	null	null	null
Os02circ19859	HWI-ST620_0171:2:2204:21113:34832#0/1_A_CTCTGACTTGAAGAAACATGCCGAGTTGCTAGCTCCTCTCCTTGGAGAACTGGACCGTTTCTGAGCAAGTGGACCAAGCATGGATCTCAACATTCCAAGA	chromosome02	26488475	26490602	plus	AG	GT	0	0	1	1	2	null	null	cds-cds	chromosome02	26488475	+	Os02t0639000-01	chromosome02	26490602	+	Os02t0639000-01
Os02circ19870	HWI-ST620_0166:8:2207:7460:113460#0/1_A_CTTCTTCGTCAGCTGTCCGTGCACGACGTATTCAGGTGCCATGTAGCCACTGCCGCACGAGAAACATGCCTGATCGAATGGTCTGCGACATCCTCCTTCC	chromosome02	26495656	26495800	minus	AC	CT	0	0	2	0	2	null	null	cds-cds	chromosome02	26495656	-	Os02t0639100-00	chromosome02	26495800	-	Os02t0639100-00
Os02circ19932	HWI-ST620_0177:7:2102:4988:34032#0/2_A_TAGAACCGTCCATTGATCCAACATGGACTCCTATTGACAAGAGAGCAAGACAGAAACTAAAGCACAGAATCGCAGAGCAAGGAAAGATTTCAATGTACAA	chromosome02	26662431	26662552	minus	AC	CT	0	0	2	0	2	null	null	cds-cds	chromosome02	26662431	-	Os02t0642600-01	null	null	null	null
Os02circ20101	HWI-ST620_0177:7:1201:20472:180269#0/2_A_GGTGGGCTAGATGAATCCGGAGGCTCTCCATGGGGAAGGGATCAGGGCATTGAGAAAAAGCATGCAAAGCTGAAGGGTAATGAAAAGGCTGTTGTTGCAC	chromosome02	27016802	27017335	plus	AG	GT	0	0	2	0	2	PIF/Harbinger	null	cds-cds OR intron-intron	chromosome02	27016802	+	Os02t0649700-01	chromosome02	27017335	+	Os02t0649700-01
Os02circ20172	HWI-ST620_0166:6:2307:10606:96426#0/2_A_GCTATGCATGCACCGATGTACTGCTTAAGTTTATGTGATGAACTTGTTAAGTTTAAAACGCCGTCGCATGTGATGTGTACTCTGTTGAACTCCAAAACAT	chromosome02	27118909	27119048	plus	AG	GT	0	0	2	0	2	Mutator	null	ncRNA-ncRNA	null	null	null	null	null	null	null	null
Os02circ20413	HWI-ST620_0171:4:1304:9381:195017#0/1_A_CTGCCTCCTCCCATTCCTTCTTTGAGTGCATCCTCCAAGACCTTCTTCTGCTGGACTACTTTGTTTCCCTTACAACTCGGGCATTTATCCTTGTCACTTA	chromosome02	27376315	27378209	plus	AG	GT	1	1	0	0	2	null	null	cds-cds	null	null	null	null	null	null	null	null
Os02circ20758	HWI-ST620_0171:4:1106:9412:177283#0/1_A_CCTTGTAGTCCTTGTCGTCCCCGGCGCCCTGCGCTTGAATGGGATCGCCCTGATGATCACCTGGTGGTAGATGGCAGCCAGGGCAGCGCCAACGAAGGGA	chromosome02	27900527	27903148	plus	AG	GT	0	2	0	0	2	PIF/Harbinger	null	cds-cds	null	null	null	null	null	null	null	null
Os02circ20876	HWI-ST620_0166:7:1102:20941:10070#0/1_A_CCGTCTTGGCGTGATCACCCTCGATCTTCTCCACGGGGACGGCGGTGTCGTGGTGGGGATCGCCGTAGCCCTTCTTCTCCTCCTCGGGTGCACGTGGCAG	chromosome02	28022086	28022193	plus	AG	GT	0	0	2	0	2	null	null	intergenic-intergenic	null	null	null	null	null	null	null	null
Os02circ21163	HWI-ST620_0166:6:1207:7372:122285#0/2_A_GGCGAGACTAGTGAAGAAGGAGGTGGAGCCCATCTTCAGCGACAGCGACGCCATGAAGAATGCCCCTCAGACCACCAGGTTTAGCGTCGGATCCAGTCTC	chromosome02	28225994	28226362	plus	AG	GT	0	0	2	0	2	null	null	5utr-cds	chromosome02	28225994	+	Os02t0672700-01	chromosome02	28226362	+	Os02t0672700-01
Os02circ21246	HWI-ST620_0177:6:2203:20928:22217#0/1_A_GGTGCACTGATGCCTCATCGTATTCCGTATGCTCAACCCATGTGACACTGGCCCTGAGGAGTGAAACCGAGTTCCCATCCCGCTGCCCCTTGGCGATCTG	chromosome02	28345943	28346722	minus	AC	CT	0	0	2	0	2	null	null	cds-cds	chromosome02	28345943	-	Os02t0674800-01	chromosome02	28346722	-	Os02t0674800-01
Os02circ04760	HWI-ST620_0171:7:2304:17046:92449#0/1_A_GGCGGAGACGCGTGGTGGCGAGGGTTTCTCTTGAATGGCGAGAAGATGCCAATGAATGGTTGCTTGGTAGCCCGAGGCAGTGGCAGCGGTGAGGGGCTCC	chromosome02	2838213	2838756	plus	AG	GT	0	1	0	1	2	null	null	cds-cds	null	null	null	null	null	null	null	null
Os02circ21571	HWI-ST620_0167:6:1105:18143:147393#0/1_A_CTTTGAGTTTTTCAATGCGTTCAAGTTCCCATTCTTCCTCTTCAACATTGACATTATCCTCTTATGCTTGTTAGAATGATGGTGTGCTGATTCATCGCTC	chromosome02	29153083	29154528	minus	AC	CT	1	1	0	0	2	null	null	cds-cds	null	null	null	null	null	null	null	null
Os02circ04833	HWI-ST620_0166:6:2305:4394:174499#0/2_A_TGCTACTGACATCTGCATTGAATAGATGGAGGAGGACAAGTCAGCAATTCCGGTTGCTGAAGGGGCCATCAAGAGCATCAAGCTTAGCCTATCCACTGAG	chromosome02	2912266	2917949	minus	AC	CT	0	0	2	0	2	null	null	5utr-intergenic	null	null	null	null	chromosome02	2917949	-	Os02t0152800-01
Os02circ00662	HWI-ST620_0177:8:2304:8866:51819#0/1_A_CTGTCAAGTAATAATGAGGAATAGTTTGTTTAGAGCTTAGCAGGCGGTTTGATATGGTGAATGTGCCTCCCTCATAATCTTCAGGTTTTAAGCTGTTATC	chromosome02	291865	292764	minus	AC	CT	0	2	0	0	2	null	null	intergenic-intergenic	null	null	null	null	null	null	null	null
Os02circ21795	HWI-ST620_0167:7:1107:17219:77036#0/2_A_CCAGAAACAAGAAAACACTTCTACAGTCACAGGCTTAATAGAAGGATCGAGGAAAACCCTGCTCATATCGGTGAAGAGGCACGAGATGATGATCTATATT	chromosome02	29483392	29483935	minus	AC	CT	2	0	0	0	2	null	null	intergenic-intergenic	null	null	null	null	null	null	null	null
Os02circ21929	HWI-ST620_0167:7:2102:11045:162908#0/1_A_GGGGAGTGCAGGGAGGTGGTGGCATGTAGGCTGGAGATCGCCATCTTTGCTTCTGGCCTTTCTCCTTCCTGCCAGTCCTGTCCAAGGAATGGTAGTCATC	chromosome02	29557999	29558378	plus	AG	GT	2	0	0	0	2	null	null	5utr-cds OR cds-intergenic	null	null	null	null	null	null	null	null
Os02circ21968	HWI-ST620_0166:7:2202:5967:72548#0/2_A_CCGGAGCTTATCCAGCCCCCCAAGATTTTTGTCATTGAGGGCTTACATCCCATGTTGGGCAAACGATTTTGATCTCATGTATGAGCAGGTGAAGGCAATC	chromosome02	29558401	29558560	plus	AG	GT	0	0	2	0	2	null	null	cds-intron	null	null	null	null	null	null	null	null
Os02circ22021	HWI-ST620_0177:8:1207:2256:183592#0/1_A_TTGGCTTCTCAATTGCCTTGCCTTCTTTGATTGCCTTCACCTTTCCTTCATTGTCATCAGGAATAAGCTGGGTTGGCAGAACTTCAATCACTGCATCAGC	chromosome02	29558432	29559355	plus	AG	GT	0	2	0	0	2	null	null	cds-cds	null	null	null	null	null	null	null	null
Os02circ22063	HWI-ST620_0167:5:2201:4975:199088#0/2_A_GGATGGCCAATTTGACAGACTAGATGACTACCATTTCTTGGAGAGGACTGGCAGGAAGGAGAAAGGTGTGACTGCCCTGGACCCTAGGGCAAACGATTTT	chromosome02	29558342	29559798	minus	AC	CT	2	0	0	0	2	null	null	5utr-intron	null	null	null	null	null	null	null	null
Os02circ22074	HWI-ST620_0173:6:1208:16275:152834#0/2_A_TATCTATGTTGAGAGCCATTTAAGCAACCTCCCTGCACTCCCCATGCACCACCAACACAAGCTTCAGGCAGAATCAGGTCATCTTCTTCACCACCAGAAG	chromosome02	29558041	29559828	minus	AC	CT	2	0	0	0	2	null	null	5utr-intron	null	null	null	null	null	null	null	null
Os02circ22100	HWI-ST620_0166:6:2107:8810:161878#0/2_A_CGGCAGCAACAATGGAACAGGTCTCTTCCAAACTATCGTTATCTATGTTGAGAGCCATTTAAGCAACCTCTCAACCAAATTTTATGGAGAGGTGACACAG	chromosome02	29559799	29559924	plus	AG	GT	0	0	2	0	2	null	null	cds-cds	null	null	null	null	null	null	null	null
Os02circ22147	HWI-ST620_0167:5:2305:11720:136246#0/2_A_GAACGATCGACATCTGAACCTCCAAGCTCTACTCCATTGAGTGATCCCATCAACAATAAGGTTTCAGAGAAATGGTGGTGTGCACCAGGACATGGTGACT	chromosome02	29621888	29622433	plus	AG	GT	2	0	0	0	2	null	null	cds-cds	chromosome02	29621888	+	Os02t0699400-00	chromosome02	29622433	+	Os02t0699400-00
Os02circ22437	HWI-ST620_0167:5:2202:6030:175747#0/1_A_CTGGAACTTCTATCAAGGGAACCAAATTGCATGTGTTCGTCCGAGGTGAAAAATACTTATCCTGTTCTCATCCAATCTGAAACGTGGGGATGATATTAGA	chromosome02	29855199	29855540	plus	AG	GT	2	0	0	0	2	null	null	intergenic-intergenic	null	null	null	null	null	null	null	null
Os02circ22446	HWI-ST620_0166:8:2203:1979:30074#0/2_A_GTCGCCGGACCTGGAGATCGTCGCGGAGGTGCAGCTGCCCGGACGCGTCCCCTACGGTTGGTGTGCTACGTCCACGACGAGGCCACCGGCGAGAACCGGT	chromosome02	29882292	29882410	plus	AG	GT	0	0	2	0	2	null	null	intergenic-intergenic	null	null	null	null	null	null	null	null
Os02circ22541	HWI-ST620_0167:5:2102:10843:139313#0/2_A_GACTGCACCGTGGCGCAGCGCGACTTCGGGCCCGGGTGCCCCGCCTCGGCGTGATCCCGCGCTACGCCACCGACGAGTCGGAGATGCGGTGGTTCGAGGT	chromosome02	29882481	29882905	minus	AC	CT	2	0	0	0	2	null	null	cds-cds	null	null	null	null	null	null	null	null
Os02circ23454	HWI-ST620_0167:5:2304:11930:99714#0/1_A_GGCATATACAGAACCATCGCTTGTTAACATTTGTCCGTTTACCTTTATCCCACCTTGCTTTTCAAGTTCAGCAATGTTTATAACCTTAGCTTTACGCCGA	chromosome02	30086343	30086780	minus	AC	CT	2	0	0	0	2	null	null	cds-cds	null	null	null	null	null	null	null	null
Os02circ23525	HWI-ST620_0166:6:2208:11868:8928#0/1_A_GTTTGCCATTTTCCTCTCCACTCGGTAAGAATTTCAACGGTCTCGGCATCATGAGCATTATTGCACTTTTGGCTCCACAAGTGAAAAGAATTTTGCAGCC	chromosome02	30154943	30156236	plus	AG	GT	0	0	2	0	2	null	null	cds-intergenic	chromosome02	30154943	+	Os02t0708500-01	null	null	null	null
Os02circ23655	HWI-ST620_0167:5:1203:5935:15077#0/2_A_CTTGCGGTAGTTGAAGATGCTAAAGAAATACTAGAGGAAGCATCGCAGAGCGATGATGATTATGAGCCAACTCCTGTCTATCAGGTAGCCTATAACTCAT	chromosome02	30239599	30240015	minus	AC	CT	2	0	0	0	2	null	null	intron-3utr	null	null	null	null	null	null	null	null
Os02circ23728	HWI-ST620_0177:8:1307:10027:195369#0/1_A_GCCACCTTTCTAGATTCTTCTTTTCATTGTTCAGTTTCTTGGCTTCCTCTTCAAGATATCTCTCTTTGCTCGCTTGTTTTTTCTCCATCTCCATCTCCAA	chromosome02	30240587	30240880	plus	AG	GT	0	2	0	0	2	null	null	intergenic-intergenic	null	null	null	null	null	null	null	null
Os02circ23791	HWI-ST620_0177:8:2104:15438:199480#0/1_A_TCAATCTGCAGCTTTTGTTCCGATAACTGTTTCTCATCATTTTGTAGTGATTCCTGTCCCTGTTATATGCTTCTCTACGCTCTTTCAGACTCTTGCTGAG	chromosome02	30240323	30241203	plus	AG	GT	1	1	0	0	2	null	null	intergenic-intergenic	null	null	null	null	null	null	null	null
Os02circ24064	HWI-ST620_0166:6:1204:10106:93614#0/2_A_CTGAACAGCGTTGTAGTGCTCATTGGGCAAAGCTTTTGCATTCTGGCTTGTGCGGTGCAGCACCAAGTTCGTGGACAAGAAACTTGCAATTGACTGGATG	chromosome02	30303594	30307292	plus	AG	GT	0	0	2	0	2	null	null	intergenic-3utr	null	null	null	null	null	null	null	null
Os02circ24102	HWI-ST620_0177:6:1208:2276:4566#0/1_A_GAAGGAAAGCTAACAATCTGCCGCTGCTTGTTCATGGAGAAGAGCAATATCTGGTTATTATGGAAGGATGCAACAAATTCTGCAGATGGAGAAAGATAGG	chromosome02	30314796	30315091	minus	AC	CT	0	0	2	0	2	null	null	cds-cds	chromosome02	30314796	-	Os02t0711000-01	chromosome02	30315091	-	Os02t0711000-01
Os02circ24272	HWI-ST620_0173:6:2205:4140:36508#0/1_A_GGGTAAAGGTAGCAGCTTTAATCACAAGATTAACGGGAATAGCTAAAAGGTTTGGTCTTGGGATGTAATGTGGTTTTGAAAAATACTAGTACTACAGTAG	chromosome02	30584170	30585814	plus	AG	GT	2	0	0	0	2	PIF/Harbinger	null	intergenic-intergenic	null	null	null	null	null	null	null	null
Os02circ24273	HWI-ST620_0171:7:1102:18960:3157#0/2_A_GATTGTTGTTGTAAGCAGCAAGATGGGTGCCTCCCACATTACCCTCCGCCACCGCTGTTGTTTCGTGATTCTTTTCGATTTCGGTACGGTGTGTGAAATC	chromosome02	30583035	30586195	minus	AC	CT	1	1	0	0	2	null	null	intron-cds	null	null	null	null	null	null	null	null
Os02circ24318	HWI-ST620_0166:6:1206:11552:117907#0/2_A_GTCATAGAAAGTAACATCAGTGGTACCTTGCTATGGTTTTGTACCATGCTGGCGATATACCAGGAGCAATTGTGCAGCAACATAGAGAACTTATCATAAA	chromosome02	30619871	30622152	minus	AC	CT	0	0	1	1	2	null	Tc1/Mariner	cds-3utr	null	null	null	null	chromosome02	30622152	-	Os02t0717400-01
Os02circ24865	HWI-ST620_0167:4:1107:11540:16605#0/2_A_CAAGAAAAGTCTGCGTATGGTTGATTACAGTAAATATTTCTCAGAGGTGTTCTTGAGAAAGTCGGGATAGAACCAGAAATTCAGCGAATTGGTCGTTACA	chromosome02	31158331	31161015	minus	AC	CT	2	0	0	0	2	null	null	cds-cds	chromosome02	31158331	-	Os02t0728100-01	null	null	null	null
Os02circ25803	HWI-ST620_0167:7:1302:13744:19382#0/2_A_GTTATGGAATCACTGGAGGAAGACCTGAAAACTGAGGATGGGAAGGAAGAGGGTCAGTTTACTGCAACCACTGAGGTTGAGGAAACAAGGGAGGATGACT	chromosome02	31866088	31866312	minus	AC	CT	2	0	0	0	2	null	null	cds-cds	null	null	null	null	null	null	null	null
Os02circ25858	HWI-ST620_0171:4:2105:15151:113272#0/1_A_GTGCGCTCTAGCTCTGCCGAATTCTCTCTCAAGGTTGCCTGATTCATATTTTGAATGGCGGTAGTAAATACTTTCTCATTCCTTCTGCGGAATGCTTTTT	chromosome02	31869101	31869884	minus	AC	CT	0	2	0	0	2	Mutator || hAT	PIF/Harbinger	intergenic-intergenic	null	null	null	null	null	null	null	null
Os02circ25890	HWI-ST620_0171:6:1301:15415:23568#0/1_A_CTAGTCTCTTGATGTACTCCTCTTGATTTCTCCTTTCAATAGACCTTGCATTCTCTTGAACCTCCTCAGTTGCTGATAAGATATCACGACCACCATCCCT	chromosome02	31878168	31879754	minus	AC	CT	1	0	0	1	2	null	Tc1/Mariner	intergenic-intergenic	null	null	null	null	null	null	null	null
Os02circ25909	HWI-ST620_0171:4:1106:15680:149125#0/2_A_CAAGTTCATTTGCTCTCTGCTGATCTTGATAAAAGGGACATGGAACTCAGGGAGAGCTTCCAAATTGAGTTGAAGATGAATACAAGGAAAAGCTTGAGAA	chromosome02	31883193	31886417	minus	AC	CT	0	1	0	1	2	null	null	cds-3utr	null	null	null	null	null	null	null	null
Os02circ25928	HWI-ST620_0173:6:1204:2182:13421#0/1_A_GTGGTCTTCACGGAGATCAGCACCCCGATCGCGAACTCCTCGCCGCCACCCTCCATGTCGAGCACGCAGCCGGCCGGGTCGAGCGGGTCGTCGGCCTTGC	chromosome02	31914770	31915153	plus	AG	GT	2	0	0	0	2	null	PIF/Harbinger	intergenic-intergenic	null	null	null	null	null	null	null	null
Os02circ26142	HWI-ST620_0166:6:1305:6440:15273#0/1_A_CGCGCGCCGCGGCGGCGGAGGACGACAGCGAGGTCATCGTTTCTGTGGCTTCACCAGCCTCGCCATCCTCCTGCCGCGGCTCATGCCCCCACGAACCGAC	chromosome02	32102285	32102403	plus	AG	GT	0	0	2	0	2	null	null	cds-cds	null	null	null	null	null	null	null	null
Os02circ26404	HWI-ST620_0167:6:1204:15090:65507#0/2_A_CGTCATCAGACTGTAAATTCTGTGCTATAAAAAGAAAGGATGGTCCAAGTGCGAGAACTTTTTCGTGACACAGAATCAACTGAATTTATAATTGTGACTA	chromosome02	32109303	32109599	minus	AC	CT	2	0	0	0	2	null	null	cds-cds	chromosome02	32109303	-	Os02t0745000-01	null	null	null	null
Os02circ26518	HWI-ST620_0167:5:2207:15693:52474#0/2_A_CTGTGAACATGAAAGATTGTGATATTGGTTTCCTCAAATGTCATAAAGCACCGATTCGCCTGATGGGTTCACAATGAATACAGAAGGCCTGGATTCTTGT	chromosome02	32300971	32302423	minus	AC	CT	1	0	1	0	2	null	null	5utr-3utr	null	null	null	null	chromosome02	32302423	-	Os02t0748300-01
Os02circ27234	HWI-ST620_0166:8:2104:19666:177128#0/1_A_GCGCCTTCTGTGCAAGTGCCCTTAGCTCTTGCTCCTTCCTCTCCTTCTCCAGTTGTTCATCTGCATCGCCCTACACATCAGAATCACCGTCCTTCTTAGG	chromosome02	32852016	32852567	minus	AC	CT	1	0	1	0	2	null	null	cds-cds	null	null	null	null	null	null	null	null
Os02circ27294	HWI-ST620_0166:8:2104:8836:71962#0/2_A_TGACCATGCAAGTGGGTGAAGTTGCTCGTATTCAGGGAAAGATAATGATCTCGCTAAGAAGTTTTGGAGCACAAAGGACGCAGGCCAGGAGCCATTCAGT	chromosome02	32874371	32875341	minus	AC	CT	0	0	2	0	2	null	null	cds-cds	chromosome02	32874371	-	Os02t0760300-01	chromosome02	32875341	-	Os02t0760300-01
Os02circ27312	HWI-ST620_0166:6:2103:7941:180660#0/1_A_GTACTTGTCGATGATTTCATTCATACCTAATTTCAGGGATACATCCGAGCCATCATCATTATCCTGCGACTGTGAACTTCCAGAATGCAATGCAGTCATC	chromosome02	32897558	32899847	plus	AG	GT	0	0	2	0	2	null	null	cds-cds	chromosome02	32897558	+	Os02t0761000-01	chromosome02	32899847	+	Os02t0761000-01
Os02circ27313	HWI-ST620_0177:6:2202:9151:170832#0/1_A_CATCACAGATTCAGAGGACTGTCCTTCGAAGGCAGCCCTAATTTCAGGGATACATCCGAGCCATCATCATTATCCTGCGACTGTGAACTTCCAGAATGCA	chromosome02	32899749	32899855	minus	AC	CT	0	0	2	0	2	null	null	intergenic-intergenic	null	null	null	null	null	null	null	null
Os02circ27321	HWI-ST620_0171:4:2106:20996:46492#0/1_A_GGCAACGTGGCGGCGTGGCTAGCTGGGGCGAGATTAGGATTTCCTCCGCTTCTGGGCCTTCTCAAACCCTAACTTTGCAGCATACTCATGGACGTCATCT	chromosome02	32918232	32919033	plus	AG	GT	1	1	0	0	2	PIF/Harbinger	null	intergenic-intergenic	null	null	null	null	null	null	null	null
Os02circ05036	HWI-ST620_0166:8:1106:15128:125383#0/2_A_GATCAACTTATTCATGACATGTTTGACCCTAGATACAGTTGATGCAATCACAGATGAGGACAATCTGGAGTACAGTGAGAATGGGAGATGGCCTTTTCAA	chromosome02	3308777	3308885	plus	AG	GT	0	0	2	0	2	null	null	intergenic-intergenic	null	null	null	null	null	null	null	null
Os02circ05043	HWI-ST620_0177:6:2205:14656:5720#0/1_A_GCCATCTCCCATTCTCACTGTACTCCAGATTGTCCTCATCTGTGATTGCATCAACTGTATCCAATGTTCGTACAGCAGAACGCCGGACTGATGTAATACT	chromosome02	3308777	3310891	plus	AG	GT	0	0	2	0	2	null	null	intergenic-intergenic	null	null	null	null	null	null	null	null
Os02circ05065	HWI-ST620_0167:7:2106:16643:2502#0/2_A_GCAACTCGTCATGTGTTTCATGCACTGGATAAACAGGTCATGCCGTTTCTACTTAGAAGAACAAAGGATGAAGTTTTATCTGATCTTCCTGAGAAGATTA	chromosome02	3315825	3316158	plus	AG	GT	2	0	0	0	2	PIF/Harbinger || hAT	null	intergenic-intergenic	null	null	null	null	null	null	null	null
Os02circ27889	HWI-ST620_0167:6:2202:6773:86791#0/1_A_GTCGATGAGAGTTCAATTTTAGCCTTCTCAGCAGCTTCACGTAACCTCTGCAGGAATCTTGTCCCTGTACTCTCCCAGACTTTTCTCAACGCTGTAAATG	chromosome02	33545200	33546443	minus	AC	CT	1	1	0	0	2	null	null	cds-cds	null	null	null	null	null	null	null	null
Os02circ28014	HWI-ST620_0171:2:1301:21087:162760#0/1_A_TGCTTCTGCTCGCCGTTTGGAAGCCCAATCGGTGTAGCGAATTTCTGAATGCAGACACTAAGAAGTGGTGATATTTCCTTTTTCAGATTATCCCTGAGTT	chromosome02	33765758	33767540	plus	AG	GT	0	0	0	2	2	null	null	cds-cds	chromosome02	33765758	+	Os02t0777700-00	chromosome02	33767540	+	Os02t0777700-00
Os02circ28194	HWI-ST620_0171:1:2202:1539:140509#0/1_A_GTTTTGTTGACCTCAATCAAGTTGGGGTTTCTAACCTATGCCCTCGCAGCCGCCACTATCTCAGACCTCCTTTGAAGCTTTGCAGTATGAGATAATCAAG	chromosome02	33986106	33986385	minus	AC	CT	0	0	0	2	2	null	null	cds-cds	chromosome02	33986106	-	Os02t0781800-01	chromosome02	33986385	-	Os02t0781800-02
Os02circ28250	HWI-ST620_0167:5:2202:7358:64696#0/2_A_CTTTGATGACATGCCCGTTAGCGATTTCTATTGAGGAATTCGAAGTCTTCTAGTCGGAGCAGGGAAGCAACTCATTTGGCTGCTCTGACTTTGGCTGGGA	chromosome02	34056293	34056644	minus	AC	CT	2	0	0	0	2	null	null	cds-3utr	null	null	null	null	null	null	null	null
Os02circ28357	HWI-ST620_0166:7:2107:12867:176259#0/2_A_CATGATACTAATGGATCTTCTGACTTGTCCCAACAACCTTCAAGCTTTCAACAGTCCGAGAACTTTCAATCATGAGTCCAAAGAGTCCACCTGTTTCGAT	chromosome02	34231439	34231578	plus	AG	GT	0	0	2	0	2	null	null	cds-cds	chromosome02	34231439	+	Os02t0786000-01	chromosome02	34231578	+	Os02t0786000-01
Os02circ28376	HWI-ST620_0167:5:1205:4899:199541#0/1_A_GCTGCATTTGGTAAAAGGGGTCTGCAGTCCTTTTGATAAAGCTTCTGCTTCAGCGGTTGTAGCCTCAATTCCAGAACTTTTCTGCTGCTCACCACTTCCA	chromosome02	34244942	34245970	plus	AG	GT	2	0	0	0	2	null	null	cds-cds	null	null	null	null	chromosome02	34245970	+	Os02t0786200-01
Os02circ28749	HWI-ST620_0171:1:1301:17265:18075#0/1_A_CCCGAGAAAGAGAATGTGACAATGTAACAGACAACTGAGACAACCAATAGAGCCATATTGATTCCGCAGTCATGTCCAGATGGAGTGAACCAGTGAAAGA	chromosome02	34548068	34548172	plus	AG	GT	0	0	0	2	2	null	null	intergenic-intergenic	null	null	null	null	null	null	null	null
Os02circ28932	HWI-ST620_0167:7:2202:16780:198818#0/1_A_TTGGTCTTAGGTGGATTATTATTTACCCTCATCGCTTGCTGGACCAGAAAAGCTCCTCTCTCCATGGAGACATGCTCGTAAATGACCTTGGTCTTGTCAC	chromosome02	34666365	34667018	minus	AC	CT	1	0	0	1	2	null	null	5utr-cds	chromosome02	34666365	-	Os02t0795300-01	chromosome02	34667018	-	Os02t0795300-01
Os02circ29023	HWI-ST620_0171:6:2102:12188:188818#0/2_A_CAATAAATGTTGTCTGCTCAACACCTGAAGTCGCAAACAGAATTTTGGACGTGTCATGATGGCCCTTGCAGTAGATGTCTCTCGTTTTGAAGGAGTGCCG	chromosome02	34799140	34800729	plus	AG	GT	0	0	0	2	2	null	null	cds-cds	chromosome02	34799140	+	Os02t0797500-02	chromosome02	34800729	+	Os02t0797500-02
Os02circ29232	HWI-ST620_0166:8:1301:17985:198115#0/1_A_TACCAGGTCTTTGAAGGTTACCTTCCCCTTGCCATCAATGTCATACACCTTGAATATCACTCTCTTTGTTCCTCTGTCATGAATGACCCTGTTTGGTCCC	chromosome02	35064293	35064402	minus	AC	CT	0	0	2	0	2	PIF/Harbinger	null	cds-cds	chromosome02	35064293	-	Os02t0802400-01	chromosome02	35064402	-	Os02t0802400-01
Os02circ29264	HWI-ST620_0171:3:2305:17885:15882#0/2_A_TGAAAATCAAGCATCTGTCAACTGTTCTACACAAAACGGATGATATTAAGAAGACAAGATCCATGCAGGGATTGTCATTTTTGGCGAACATTGGTGGGCC	chromosome02	35095854	35097317	plus	AG	GT	1	1	0	0	2	null	null	cds-cds	null	null	null	null	chromosome02	35097317	+	Os02t0803200-01
Os02circ29272	HWI-ST620_0166:7:2105:4875:97803#0/2_A_GTTTACACACCATCCACACTTTGCAGTCCGCCAGATAGAGCAGGTGGCTGAGCACAACAGAATAGCCCTAAACATCATCAGCCAAGTTGGAGCTGGTGAT	chromosome02	35106561	35106683	plus	AG	GT	0	0	2	0	2	null	Tc1/Mariner	cds-intron	null	null	null	null	null	null	null	null
Os02circ29519	HWI-ST620_0171:7:1303:1755:166755#0/1_A_CCTGCTTGCACCCATTGGGTTGGCTGGAGGTGCCATGGCACTCGCACCTGTACCCACCATATGGTTGCTGCCCTCCGTATCCGGTACCCATTGGATTATA	chromosome02	35285027	35285393	minus	AC	CT	1	1	0	0	2	null	null	cds-cds	null	null	null	null	null	null	null	null
Os02circ29953	HWI-ST620_0166:8:1102:18006:100054#0/2_A_GCTGAGTCCTCGGATAATTGTATAAAAGAGGTGCTGCCGACTATTCAGCCTTCCCTATGCTCCTAAAGCAGCTTGTGACCCCACTCATAACCCAGATTCT	chromosome02	35839412	35839985	plus	AG	GT	0	0	1	1	2	null	null	cds-cds	chromosome02	35839412	+	Os02t0816300-01	chromosome02	35839985	+	Os02t0816300-01
Os02circ29983	HWI-ST620_0166:6:1208:9649:9830#0/2_A_TGGCCAAGCACTAAGTATTCGACCAGATATTCTGTCCCCTGCAGCAATGACTGAATTGCAGAAACTTTGTGATAAGAATGAAGTAGCGCGTGCGATTGAG	chromosome02	35864261	35864404	minus	AC	CT	0	0	2	0	2	null	null	intergenic-intergenic	null	null	null	null	null	null	null	null
Os02circ30051	HWI-ST620_0171:7:2202:20456:55702#0/1_A_GAAGCAACCGTCCCAGGCGAGGGGGTGGCGGTGGGGCCCTCAGCCCTCTTCCCAGAGCTCACAAACATTTCCCAAGGAACATCTCCAACGAGCATCCAGT	chromosome02	35930012	35931412	minus	AC	CT	0	2	0	0	2	null	null	cds-cds	null	null	null	null	null	null	null	null
Os02circ30357	HWI-ST620_0171:6:1201:19597:196483#0/2_A_CCGAACGATCCCTCGCCGCCGCCGCTGCCGCTCGAATTCTCCGGTGGCTGGCTGCTCTCGACTCCTTCGCGCGTCGATTTCATGCGGCCGGGTGGTTGCC	chromosome02	36039905	36040013	plus	AG	GT	0	0	0	2	2	null	null	intergenic-intergenic	null	null	null	null	null	null	null	null
Os02circ30479	HWI-ST620_0177:7:2303:10965:89726#0/1_A_CCCTGCTTCCGCCTGATCTGCTGCTCCTTGATCGAGTTCCACAGCTTCGTGATGGCGTCCCTTTCTCCTGGAGGTACTCGAACGCGTTGACATCAAGCTT	chromosome02	36087133	36087248	minus	AC	CT	0	0	2	0	2	null	null	cds-cds	null	null	null	null	null	null	null	null
Os02circ31104	HWI-ST620_0166:6:1301:7584:191777#0/1_A_GCTTCTCAGATGGTCTTGAATATGGATCGAAGTAGAAATAAGCAACAGGGCTATTCGAAGAACGACTGCGAGAAAAAACCACATTCATCCAAGCCCCTCC	chromosome02	36541438	36541539	minus	AC	CT	0	0	2	0	2	null	null	cds-cds	null	null	null	null	null	null	null	null
Os02circ31268	HWI-ST620_0171:3:2203:16961:129539#0/1_A_GTCGGCGTGGAAGCCACTGACGGCTTTCTCGGACTCGAGGCCCGCGAGGACGAGCAGTCCTCCCAGATCTTCCTACTCCAAAGTGGAGGTAGAGATAACC	chromosome02	36628776	36630482	minus	AC	CT	0	2	0	0	2	null	null	intergenic-intergenic	null	null	null	null	null	null	null	null
Os02circ31312	HWI-ST620_0166:7:2303:6699:63547#0/2_A_CAAGAACATCATATATACTTTGGTGGTTGGTGCAAAAGAGAGAGAATCCCGATAGCGTTGGATATGGCTGCAGACAGTGAAGGAAAAGATCGTGATCTTA	chromosome02	36653153	36653313	plus	AG	GT	0	0	2	0	2	null	null	cds-intergenic	chromosome02	36653153	+	Os02t0832400-02	null	null	null	null
Os02circ05516	HWI-ST620_0171:8:2302:10401:184858#0/1_A_GCGCAAAGTTTGTTGTTCCATCTAAAGGATCAATGCACCAGAGATACTCCGACAAGGCATCTCCAATAAGTCCACCTTGTCTGTCTTACTGACATGAATC	chromosome02	3794384	3795353	minus	AC	CT	1	1	0	0	2	null	null	cds-cds	chromosome02	3794384	-	Os02t0169900-01	null	null	null	null
Os02circ05641	HWI-ST620_0171:8:2201:6896:69290#0/2_A_CACCAAGAAAAAGTAGGGGAGAAGTGGAATACAATGGCGAAACTCCAGGAAGAGTGGGTGGATGAAGTCATTCCTGATGCTCCATGGGTGGTAACGGAAG	chromosome02	4026482	4028060	plus	AG	GT	1	1	0	0	2	null	null	cds-cds	chromosome02	4026482	+	Os02t0173500-01	null	null	null	null
Os02circ05697	HWI-ST620_0171:2:2304:10021:108144#0/1_A_GGCAATAGAATTATCAGGCAGACTAGCAAATGCTTCAACAACAGCTTGTATGGTTACCACCTAAAGTTAGTATTCCACGATGAGCTTTCTTGAGCAGGCA	chromosome02	4096075	4099309	minus	AC	CT	0	0	1	1	2	null	null	5utr-3utr	null	null	null	null	null	null	null	null
Os02circ00880	HWI-ST620_0167:5:2305:5336:29039#0/2_A_CAAGTATGTCAGTGTTAGACAAGATGAGAAAATGGAGCTGGCTAAGCTTTTGGATCGTGTGCCTATTCCTACCTCTACATCCGGATGCTCCGGAATCCAA	chromosome02	413634	414756	minus	AC	CT	1	0	1	0	2	null	null	intergenic-intergenic	null	null	null	null	null	null	null	null
Os02circ06129	HWI-ST620_0166:7:1207:12408:38713#0/2_A_TTTGCTCGGTGGTGGTCCGAGAGCTATTGTTGGTGATATCACCCCTTCAGATGGCGTGCCGAAGGAAGAAAAGAGCCGCAGAGAGCAAGAAGCATTGGAC	chromosome02	4385248	4385358	plus	AG	GT	0	0	2	0	2	null	Tc1/Mariner	cds-cds	chromosome02	4385248	+	Os02t0179100-01	chromosome02	4385358	+	Os02t0179100-01
Os02circ06132	HWI-ST620_0177:6:2202:10633:120361#0/1_A_CTTGCTCTCTGCGGCTCTTTTCTTCCTTCGGCACGCCATCTGAAGGGGTGATATCACCAACAATAGCTGCTGTTGACTGGAAAAACTCTTCTAGGTCCAG	chromosome02	4385248	4387271	plus	AG	GT	0	0	1	1	2	null	null	cds-cds	chromosome02	4385248	+	Os02t0179100-01	chromosome02	4387271	+	Os02t0179100-01
Os02circ06287	HWI-ST620_0166:6:2105:16658:18022#0/2_A_CAGATCTGGCTCGCATCTTAGCCGTGCTGTCGCCGGAACTACTACCGAGGAGAGTGATACGGATGCTGGTGATAATGTGGTAGTACTACTCCTTGCGTTG	chromosome02	4512126	4512588	minus	AC	CT	0	0	2	0	2	null	null	ncRNA-ncRNA	chromosome02	4512126	-	Os02t0180800-01	null	null	null	null
Os02circ06411	HWI-ST620_0171:7:2301:14823:3050#0/2_A_GCAAACGAAACTGGCATAGCAACCCAGCATCCTCTGGTGAAAAGACCAAGAAGAAAAGAAACGTTACAGTGATGGGGTGCTGGGAACTTGAACAGTCTTT	chromosome02	4626900	4628374	plus	AG	GT	1	1	0	0	2	null	null	cds-cds	null	null	null	null	null	null	null	null
Os02circ06450	HWI-ST620_0167:7:1104:4952:155838#0/1_A_GACGGCCGCCTTGTGGGGATCGGAACTAGAACAAAAATGGGAAATCAAGTAGACAATGGAGTCATCAACTCAAGGAGCAAATCATGACAAAATAGTCTAC	chromosome02	4694020	4694316	minus	AC	CT	2	0	0	0	2	null	null	cds-3utr	null	null	null	null	null	null	null	null
Os02circ06715	HWI-ST620_0166:6:1108:18738:182601#0/2_A_CGCTCGCCGACGGCGGCGGTCGCGGCGACCAAGGGGTTCCCCTGGCCCCGTTCTCCGGGAGGAGGTCGCCGCCGCCGCCGTCGGTGGTCCACGTGGCGCC	chromosome02	4937533	4937636	minus	AC	CT	0	0	2	0	2	null	null	cds-cds	null	null	null	null	null	null	null	null
Os02circ08547	HWI-ST620_0171:4:1106:9949:33410#0/2_A_TCTGACAACCCACTCTATGGGTCTTCACTGATTGAATATGCCCACATCGAGCAGTGGAATGACTTTTCGGCCACAGAGGTTGATGCTAATATTGGAAAAT	chromosome02	6747702	6752684	plus	AG	GT	0	2	0	0	2	null	null	cds-cds-acrossGene	chromosome02	6747702	+	Os02t0220500-01	chromosome02	6752684	+	Os02t0220600-01
Os02circ08568	HWI-ST620_0171:1:1201:16256:107464#0/2_A_GTTGCTGACTATGAAATACCATGGGAAGATCTTCATATTGGAGAGCGCATTGGTCTAGGTTCATATGGGGAAGTTCATCTGAACAAAAATCTGCTTTAGC	chromosome02	6759888	6760555	plus	AG	GT	1	0	0	1	2	null	null	intergenic-intergenic	null	null	null	null	null	null	null	null
Os02circ08701	HWI-ST620_0171:8:1203:8790:10173#0/1_A_CTTGGAGGAGTAGTGGTCGTCGGCCATGGCGGACGCGGGGGGAGCTAGGGTTTGGGAGGTGTGCTGCCATGAGAAGATAAAGATGGGATAGCAGATCCGT	chromosome02	7008566	7009701	minus	AC	CT	1	1	0	0	2	null	null	intergenic-intergenic	null	null	null	null	null	null	null	null
Os02circ08755	HWI-ST620_0177:8:2105:10999:135683#0/1_A_GGACGAATCATACCCTTGGGAAGCATATGCAGGAGGCTGGCTGGAATTATAGCTAGTAGCATCACCAGGTGGAGGTGCGCCATAGCCTTGCTGGTTCTGA	chromosome02	7012937	7013533	minus	AC	CT	1	1	0	0	2	null	null	intergenic-intergenic	null	null	null	null	null	null	null	null
Os02circ08813	HWI-ST620_0177:8:1308:12532:65892#0/1_A_GGAAGCAACTTAATTACCTGATCAATCTCCCGAAGAACCTCCTCTCGTTTCACATATGAGGGTCCAATACATAGTGCATCAATGTCTGCTCCAGGCCCAT	chromosome02	7174324	7176132	plus	AG	GT	1	1	0	0	2	null	null	cds-cds	null	null	null	null	chromosome02	7176132	+	Os02t0227400-01
Os02circ08896	HWI-ST620_0167:5:2307:18070:36294#0/2_A_GGATGGGACAATGCCACCATCCCAGCAGCAGCTTGCCTGAGCTGAGCTGACAGATCAGTCGTGGGTGGCTCTTGGCGCGACGCCGCGCCCCGCGCACCGT	chromosome02	7302041	7302931	plus	AG	GT	2	0	0	0	2	PIF/Harbinger	null	5utr-cds	null	null	null	null	chromosome02	7302931	+	Os02t0229400-01
Os02circ08923	HWI-ST620_0166:7:2205:14105:43136#0/1_A_CTCCAGCACCATCAGACGCGTATTCCTCATCATCCCTATGAAGGATTTGAATTCCAACACCGACTAACAACGCACGCCTCACTCCAGGTTCAAACAAATC	chromosome02	7305422	7305976	minus	AC	CT	0	0	2	0	2	null	null	intergenic-intergenic	null	null	null	null	null	null	null	null
Os02circ08993	HWI-ST620_0171:7:1303:10975:124865#0/1_A_TAGAGCCGTAAGCTGGTGTTGGGGTTGGTGTTGGGGATTTCTTGTTCACAATGGAGTTGAGGTATGCAGCTGCTCCCTCGCGGAGCAGAGCACCAGTACC	chromosome02	7353166	7353637	plus	AG	GT	0	2	0	0	2	null	null	ncRNA-ncRNA	null	null	null	null	null	null	null	null
Os02circ01150	HWI-ST620_0167:5:1105:13848:125036#0/1_A_CAGGGGGAGCCTTTCTAGATGGCATGTTACGCTTTTGTTTTACTGTCCGATGAACTGTGTCTTGCTACCTGGTCCAGAATGCCGGGAGTCCTTCTCAGAT	chromosome02	749493	751593	minus	AC	CT	2	0	0	0	2	null	null	cds-cds	null	null	null	null	null	null	null	null
Os02circ09011	HWI-ST620_0177:8:1204:15828:160327#0/1_A_TGGGTTGCAGGTTGGGGTTTGTTTGGGTTTGGCTTCCGTACATCAGGAGGTAGGCCACCTCAACAAATGAGCTGCTTTCAGCCAACTCTTCAATTGGGTA	chromosome02	7520242	7521421	plus	AG	GT	0	2	0	0	2	Mutator	null	cds-intron	null	null	null	null	null	null	null	null
Os02circ09029	HWI-ST620_0171:8:2301:18553:133469#0/2_A_CCGAAAGCTAGCAGAGGAGGTCTTCTCTATTGTCGGACGGGATCCTCCTATCCTTCCTACAAATAGTCTCTCTTATTCAGAGAACTTCTTGTATATGCTA	chromosome02	7522350	7523483	minus	AC	CT	1	1	0	0	2	null	null	intergenic-intergenic	null	null	null	null	null	null	null	null
Os02circ09128	HWI-ST620_0173:6:2305:9099:166641#0/2_A_CCTGATGCTGCACCCTTTGATGCAAGCAATGTTACTTCCTTACAGCTCATGACGGTATTGAACTACGTGTTAAGGGTGACGGGAGGCGGTATAAACTTAT	chromosome02	7654267	7654577	plus	AG	GT	2	0	0	0	2	Mutator	null	cds-cds	null	null	null	null	chromosome02	7654577	+	Os02t0234500-02
Os02circ09152	HWI-ST620_0173:6:2101:16023:160760#0/2_A_GAAAATGGGGCGGATGAGAAGAAGCAAAATGAAGAAAGCACCCCAATTGAAGAGGCAAAGAAGGTGCCAGCCAAAACTTTTACTCCTGGACAGGTGGTGG	chromosome02	7660283	7660977	minus	AC	CT	2	0	0	0	2	PIF/Harbinger	null	cds-cds	chromosome02	7660283	-	Os02t0234800-01	null	null	null	null
Os02circ09401	HWI-ST620_0171:2:2103:17852:59712#0/2_A_CAAGTACGATCCGTCCATCCTCGCCACCCGCTCCGTCTACAAGTGGATCCGCGGGGCGCCCCCGCTGGTCATCCCGGCGCACGACCACGAGGTGCTCTCG	chromosome02	8234630	8234740	minus	AC	CT	0	0	0	2	2	null	null	cds-cds	null	null	null	null	null	null	null	null
Os02circ01656	HWI-ST620_0177:8:2302:17655:24583#0/1_A_GGCGGTAATCGGTGGGGATGCCGAGCTCGCCGGCGAAGCGGCGGATGAACCTCTCCTGTCTATCCGGCGCCCACGACCTGTACCTCTCCCCGGGCTGCTT	chromosome02	825838	826706	plus	AG	GT	1	1	0	0	2	Tc1/Mariner	null	cds-intergenic	null	null	null	null	null	null	null	null
Os02circ01808	HWI-ST620_0171:6:2301:13510:168825#0/1_A_TGAAGGCGTGGATGACGTCGGGGAACTTGATGCCGTCGCGGATGAAGAANACGGGGAAGTTGTTGCCGAGGAGGTCCTGGGTGGCGTGGCTGTGGTTCTT	chromosome02	826521	826880	plus	AG	GT	0	1	0	1	2	null	null	intergenic-intergenic	null	null	null	null	null	null	null	null
Os02circ01921	HWI-ST620_0177:8:1206:18044:149992#0/1_A_CGTTCGTCGTCGTCGTCTTCGTGTCGAACGAGCTCGACGGCCGGAACTGGGAGAGGTAGTTGACCCAGATGGCGCGGAGCTCAGGGGAGACCTTGGGGTG	chromosome02	825778	827267	minus	AC	CT	0	2	0	0	2	Tc1/Mariner	null	cds-cds	chromosome02	825778	-	Os02t0115700-02	chromosome02	827267	-	Os02t0115700-01
Os02circ09507	HWI-ST620_0166:6:1105:18048:35471#0/1_A_GCTAGATGGTAACATTTTTGGCTTGAATGTAAGCCTTCCTTATAAGATTGAACATTGTTTTGCCGGGGTGTAAACAGCTGGGAAATAGTCTATATGCTTT	chromosome02	8555801	8557057	plus	AG	GT	0	0	2	0	2	null	null	ncRNA-ncRNA	chromosome02	8555801	+	Os02t0250700-01	chromosome02	8557057	+	Os02t0250700-01
Os02circ09897	HWI-ST620_0167:7:1105:18971:37415#0/2_A_GGGGAGGATGGTGGTTTGAGATCTGGATAATTCGGGTAAGGCGAAAGAGGTCTCGGAGCTGCAGGTGGCGCCGCCTCTGGGGCGGCTTCTGCTACTGGTG	chromosome02	8904662	8904847	plus	AG	GT	2	0	0	0	2	null	null	cds-cds	chromosome02	8904662	+	Os02t0257300-00	chromosome02	8904847	+	Os02t0257300-00
Os03circ11687	HWI-ST620_0166:7:1201:6227:108688#0/2_A_CGAAAATATTGACACAATCACAGATTCAGCCAGTAAGATTGCAACACCTCCCGCAACCATTACGAGCTTTGGTGATGTTGGAGCAGTTCTTGGCTGGTTT	chromosome03	10044242	10044344	plus	AG	GT	0	0	2	0	2	null	null	cds-cds	null	null	null	null	null	null	null	null
Os03circ11821	HWI-ST620_0171:1:2301:15320:199217#0/2_A_CGCCGAGAAGTTCGGAGCTGAGCTCCATTCCTTCGTCGTTGGCCTGCCCTTCGGCGTCCTCCTCTCCGGCGGCCTCGACTCCTCCCTCGTCGCCGCGGTG	chromosome03	10170463	10170591	plus	AG	GT	0	0	0	2	2	null	null	intergenic-intergenic	null	null	null	null	null	null	null	null
Os03circ12050	HWI-ST620_0171:5:2103:20537:9807#0/2_A_CCTGGTCATGTCAAGGACAAATCCTGACACCCGCTTACTGCCTCTGCATCGAAGACCAGCCAATCTGGAAGATTGAAAAAATGGATTGCTTGAAGAACAG	chromosome03	10289519	10292709	minus	AC	CT	0	0	0	2	2	null	null	intron-3utr	null	null	null	null	null	null	null	null
Os03circ12208	HWI-ST620_0171:2:1205:14572:116211#0/1_A_GTTCGGTGGAATTTCTATGCGGCGATGAGGAGGTTGCACTTAACGATGGTGTCGACGAACACGCGGGTGTCCTCGGGCGTGTTGCCCGGGGGCACGTCGA	chromosome03	10467109	10467827	plus	AG	GT	1	0	0	1	2	null	PIF/Harbinger	intergenic-intergenic	null	null	null	null	null	null	null	null
Os03circ01072	HWI-ST620_0177:6:2305:14986:188576#0/2_A_GCTAACGTACGATTTCTTCCAGAAGGTTTATGCTATATATTTCATCATATGAAAAGAGTCATGCAAAAAGATGCAGAAAGAACAGAGGATGTTGTGGCTT	chromosome03	1051875	1054408	plus	AG	GT	0	0	1	1	2	Tc1/Mariner	null	intergenic-intergenic	null	null	null	null	null	null	null	null
Os03circ12337	HWI-ST620_0166:6:2106:1735:193186#0/1_A_CGGAGCTCGATGAGGTCCTGCTGCGGCGTGCCGAACTTGCCCGCCCCGACGGTGCCGCGGAGCACGACGCAGCGCGTCGTGGTGCTCCGCCAGCGCGCGG	chromosome03	10596791	10596914	plus	AG	GT	0	0	2	0	2	null	null	cds-cds	null	null	null	null	null	null	null	null
Os03circ12737	HWI-ST620_0167:5:1303:9732:75994#0/1_A_CGTGTCTGAATCAATAGTAGGCCATATCTCAGCCTCAAAAACTGGTGTCGGAGGATCAACCTCCACAGTACCAATTTCCTTCAGGTACTTCTCTTCCCAA	chromosome03	10700601	10702172	plus	AG	GT	2	0	0	0	2	null	null	cds-cds	null	null	null	null	null	null	null	null
Os03circ12922	HWI-ST620_0177:8:1204:16220:60564#0/1_A_CTGTACCAATAATGAATATTTGTCCAATTTCATCGGAGAGAATCAGTGATGTCCCATCCCTGTTAATGAAATCTGATTTCTCTGCAACACTGTTCAACTT	chromosome03	10915866	10921650	minus	AC	CT	1	1	0	0	2	Tc1/Mariner	Tc1/Mariner	intergenic-cds	chromosome03	10915866	-	Os03t0306200-01	null	null	null	null
Os03circ13422	HWI-ST620_0173:6:1103:2750:16191#0/1_A_GCTTTGGTAGAGGGGTACTATATATGCGCCGTTGCTGTGCTCTCTGGATAGATGGATGGATGGATGGATGTGTGCTGCGCGATCTTGGACCAGCGGTTTC	chromosome03	11375217	11376204	plus	AG	GT	2	0	0	0	2	null	null	intergenic-intergenic	null	null	null	null	null	null	null	null
Os03circ13516	HWI-ST620_0167:4:1106:20429:5632#0/2_A_CGCACCTATATACGCAATGTACAGGTCATGACAACAAAGATGGGATGGTGAAACTAAATTCCAAAATGTCACAGATAGAGGGTAATTGTGCAGCAAACAG	chromosome03	11519824	11520547	minus	AC	CT	1	1	0	0	2	null	null	cds-cds	chromosome03	11519824	-	Os03t0318500-01	null	null	null	null
Os03circ13682	HWI-ST620_0166:6:2304:8177:142892#0/2_A_CCTCCGGCATCGACGGGAAGACGAGCACGGCGTGGAAGAATGGGCTCTTGGACTGGCCGAGCTGGGACATGCTGAAGGAGCCGAGCTTGTTGAGGCGCAT	chromosome03	11760955	11761056	minus	AC	CT	0	0	2	0	2	null	null	intergenic-intergenic	null	null	null	null	null	null	null	null
Os03circ13969	HWI-ST620_0171:4:2103:11839:79271#0/1_A_TGACAGTGATGATACATAAGGTGGAGCATCATGAATCCTGTGTGTTGTTCGCCCAATATTACTAGCTTCAGGCATCCCAGAGGCTTCTGCTTCCGACACT	chromosome03	11951897	11954378	plus	AG	GT	0	2	0	0	2	null	null	3utr-3utr	null	null	null	null	null	null	null	null
Os03circ14628	HWI-ST620_0166:8:2206:10523:91985#0/2_A_GTGGCTTCAACATGCGAAAACTCGCAGTGCAAGACACAAAATTATGAAAGTGAATGGCAATCTAGTTTCACCAATCCATGTACTTGCAAATGCTGAAGTT	chromosome03	12751441	12752759	plus	AG	GT	0	0	2	0	2	Tc1/Mariner	null	cds-cds	chromosome03	12751441	+	Os03t0340900-01	chromosome03	12752759	+	Os03t0340900-01
Os03circ15209	HWI-ST620_0167:5:1303:6381:110905#0/2_A_GTGCTTCAAAAAACCACACACAATTAAGGTCCATCAGAACTATGGGATAATCAACCTCCCAGACAGGTCTTGAACTTGGCGGAACCCACTAGGAGGGATG	chromosome03	13044135	13044879	minus	AC	CT	2	0	0	0	2	null	null	cds-cds	null	null	null	null	null	null	null	null
Os03circ16122	HWI-ST620_0167:7:2103:5738:68289#0/2_A_GTGTGCGTTTGATCTTCGCCGATCTGTGAATGTACAGATGAGTTTAGGAAACAGGAAAAATGAGGTGCTAAGAAAGTGAAACATGGTTTAATTTCGATTG	chromosome03	14870131	14870238	plus	AG	GT	1	0	1	0	2	null	hAT	3utr-intergenic	null	null	null	null	null	null	null	null
Os03circ16158	HWI-ST620_0166:6:1103:20141:159126#0/2_A_GATGGAAGCATCTCAAATTTAAGAAAGATTGTGTGACTGCATATTTTCCTTGGTCAACTTTGTTTCATAACCGGATAGATGGGTTCTGAAGGACCTTCTG	chromosome03	14980071	14980946	plus	AG	GT	0	0	2	0	2	null	null	5utr-cds	chromosome03	14980071	+	Os03t0367900-01	chromosome03	14980946	+	Os03t0367900-01
Os03circ01650	HWI-ST620_0173:6:1206:4164:50246#0/2_A_GCCTTGATGATGTTGATGCTGCATTCGATTGTTCAGAGGAGTGTACCATAGAGATCTGAAGCCAGAGAATCTGCTTCTTGATTCACATGGAGCTCTTAAA	chromosome03	1515346	1516486	minus	AC	CT	1	0	0	1	2	null	null	cds-cds OR intergenic-3utr	chromosome03	1515346	-	Os03t0126800-00	null	null	null	null
Os03circ16358	HWI-ST620_0171:3:2204:17604:66454#0/2_A_CAGCACCAAGGCCCGCCGCAACGTCTCCTCCCTCCCGTCCCCGGCGTTCCTGGCCGCCGACCCGGCCGCCGCGCTCCCCTCCGCCACCATCCTCCGCTTC	chromosome03	15401359	15401481	plus	AG	GT	0	1	0	1	2	null	PIF/Harbinger	intergenic-intergenic	null	null	null	null	null	null	null	null
Os03circ16409	HWI-ST620_0166:7:2208:6469:168060#0/1_A_CAACTTTGATAAAGGCTCCAGACTCCTGCCTAATCTGTTTGATAATTCCACCACCCTTTCCAATTACACCCACTACGTGATGTCGACACCAACAAGCGTG	chromosome03	15421258	15421602	minus	AC	CT	0	1	1	0	2	null	null	cds-cds	null	null	null	null	null	null	null	null
Os03circ16565	HWI-ST620_0167:7:1304:19998:45673#0/2_A_CCATTTAGGTAGTGCCAGTTGAAATTTTTACTGTAAAAACTTGTCATTGACTTGCACGATCACATCTTGTAGTACCGATTTCCTCTGACCTGTCATTCAG	chromosome03	15878633	15879862	plus	AG	GT	2	0	0	0	2	null	null	5utr-5utr	null	null	null	null	null	null	null	null
Os03circ01710	HWI-ST620_0171:3:1207:6564:161283#0/1_A_GCGGCTATCTTCTCCTTGTCTGTGTGCTTCCTCTCAAAACGACTGTGCAAATAAGACTTTAGACCCTTTTCTCTGGGTCACCTTGTACAAGATCCTTGAT	chromosome03	1589100	1589743	minus	AC	CT	1	1	0	0	2	null	Mutator	intergenic-intergenic	null	null	null	null	null	null	null	null
Os03circ17044	HWI-ST620_0167:5:2208:12240:126612#0/2_A_CATTCTAATAAAGATTCAAGAGGATTACAGAGAAGCGTCTCACTGGAACCCCTGCGAAGCCTTTAATTGAGGATGGAGGTTTCGATAGTATTACAGCTGT	chromosome03	16505178	16508005	plus	AG	GT	2	0	0	0	2	null	null	intergenic-intergenic	null	null	null	null	null	null	null	null
Os03circ17120	HWI-ST620_0167:5:1103:1691:155242#0/1_A_CCTGCAGCTTTTCCAGTCCCAGAACCAGCAACTACCTTCACCATCTCCTGACATCACGAACCTTGTAAATTGCATTGCCATGAACTTGTCCACAAAACCA	chromosome03	16614523	16615890	plus	AG	GT	1	1	0	0	2	null	null	cds-3utr	null	null	null	null	null	null	null	null
Os03circ01819	HWI-ST620_0177:6:1306:12755:11607#0/2_A_CGCCGTGAGGGCGCCGGCTGAGGCGAAGCTCAAGGTTGCCATCAACGGCTTCGGCCGCATTGGCCGCAACTTCGCCGCGAGGGAGGCGTCCTTCTCCGAT	chromosome03	1661574	1662560	minus	AC	CT	0	0	2	0	2	null	null	intergenic-intergenic	null	null	null	null	null	null	null	null
Os03circ01824	HWI-ST620_0167:5:2206:3170:138512#0/1_A_GGCCATGGCTCGTCGCTGCCGCCTGTATGCTTCTTCCTGACGCCTCCGCTGTCGTTGACGACGACGACCTCGAGGGGGGAGTTCTCGCGTTCGTGCCAGC	chromosome03	1661332	1662635	plus	AG	GT	2	0	0	0	2	null	null	cds-cds	null	null	null	null	chromosome03	1662635	+	Os03t0129300-01
Os03circ01952	HWI-ST620_0171:7:1202:11716:141148#0/1_A_GGAGTGAGTTGTGGTCATGGTTCCCTTTACGATTCCGAACTCTTCGTCCAAGATCTTGACCATGTCGTCGCCCATGACCATGGTGAGCGAGGCGTCGATG	chromosome03	1663290	1663935	plus	AG	GT	1	1	0	0	2	null	null	cds-cds	null	null	null	null	null	null	null	null
Os03circ17268	HWI-ST620_0177:8:2102:17578:96166#0/1_A_CTCGATTCCTGCCGCAAGCTCAGGTCGGGAGCGGCAACCTGAGGTTTCTTGGGTTGTACTGATTACAGAATCTTCTGCTTTCTATCATAGCAATTTGATT	chromosome03	17039796	17040081	plus	AG	GT	1	1	0	0	2	null	null	intergenic-intergenic	null	null	null	null	null	null	null	null
Os03circ02272	HWI-ST620_0166:7:1108:20261:181813#0/2_A_CTGGAGGACTACCACCTGGTTGAGAAGCTGGCCAACTTCGACAGGGAGCGTATCCCGGAGCGCGTGGACCAACTCCGGCGCCCCCGTATGGAACAACAAC	chromosome03	1788826	1789447	minus	AC	CT	0	0	2	0	2	null	null	cds-cds	null	null	null	null	null	null	null	null
Os03circ17718	HWI-ST620_0171:6:2302:15567:89787#0/1_A_GCCACATATCCCACAAACCATTTCATTCTTTCACTATGCCCAAGGAAAGNAAGAGGTCATGCAGAAATGGAACCAAATGGCATAGACTTATGCCTCCTCT	chromosome03	18148176	18152721	minus	AC	CT	0	1	0	1	2	null	null	cds-3utr	chromosome03	18148176	-	Os03t0421000-01	chromosome03	18152721	-	Os03t0421000-01
Os03circ17742	HWI-ST620_0167:5:2102:15819:186681#0/2_A_CTATGTAGCTGCACTTACTGACAACATGAGCCTTCAGAAGGCACAGGTCTATGAGCAGTCATTGGTTCGGGTTGAGGTCAAGCACAGCGGCTAACAACGA	chromosome03	18249505	18252377	minus	AC	CT	2	0	0	0	2	Tc1/Mariner	Mutator	intergenic-intergenic	null	null	null	null	null	null	null	null
Os03circ17775	HWI-ST620_0166:6:2307:18690:59585#0/1_A_CTGTTATTTTTCGCCTGAATAAAAAAGATAAGAGACCAGGCATGGTTGAATTTGCTCTATGTAAGATAATCTTTCTCCGATCTTCTGAAGATCGATTGCA	chromosome03	18307294	18308330	plus	AG	GT	0	0	2	0	2	null	null	3utr-3utr	chromosome03	18307294	+	Os03t0423850-01	chromosome03	18308330	+	Os03t0423850-01
Os03circ18212	HWI-ST620_0166:6:2308:5349:186593#0/2_A_CATGAGTGCTCTGATGAAAACGTTCATACAGTCAGGAAACATCACTCAGAGGATCTTGCAAGATGGAGGCACTTATGCTCTTCTCACAGGAACAAGAAAG	chromosome03	18772582	18773786	plus	AG	GT	0	0	2	0	2	null	null	3utr-3utr	null	null	null	null	chromosome03	18773786	+	Os03t0431800-00
Os03circ18217	HWI-ST620_0167:5:1108:1428:58904#0/2_A_CTTTGAAGCTGCTATTTCTATGACTGAACAAGGTGTTAAAGTTTTCCCAGAGATAATGGTGCCTCTCATTGGAACACAGGCAGATAGCACTAGATCGCCT	chromosome03	18786769	18787457	plus	AG	GT	2	0	0	0	2	null	null	intergenic-intergenic	null	null	null	null	null	null	null	null
Os03circ18286	HWI-ST620_0167:5:2307:6864:103207#0/1_A_GTGGCGATCTGCGGTGGCGCTTGGTGGTGGGGTAGGGGCGCTGCGCGGCGGGGTGGTCGCGGTCGACGGCACCACCGCCTCCACCGGCGAACGCCGCCCC	chromosome03	19201150	19201736	minus	AC	CT	1	1	0	0	2	self-complementation	self-complementation	cds-intergenic	null	null	null	null	null	null	null	null
Os03circ18326	HWI-ST620_0167:5:1203:20169:87401#0/2_A_GTTAAGTCAAGTTTCCAATCAGCAGAATGTTAAGCAAGAGCCAGGAAACAGTTCTCAACAAAGTAATTCTGGTCAGAAGCAGCCTTTGCAACAGATGAGG	chromosome03	19275472	19276200	minus	AC	CT	2	0	0	0	2	null	null	cds-cds	null	null	null	null	null	null	null	null
Os03circ18626	HWI-ST620_0177:8:1108:5044:57330#0/1_A_CCTTCCTTATAACCCCATCATAGATTCTTAGATATGTCAATTGACCAAACCGACCTTTGCATCAACCTTGTACTCTCTCCTGATGCGTTCAACATAGATA	chromosome03	21219407	21223622	plus	AG	GT	0	2	0	0	2	null	null	cds-cds	null	null	null	null	null	null	null	null
Os03circ02680	HWI-ST620_0166:7:1205:11321:133665#0/2_A_TCTCGGCATCGGGCGCGGCGAGGACGAGGCGTGCGAGTCGCTCAGGACGAGGACGAGGACGAGGAGGAAGACGAGGACGAAGAGGAAGAGGCGGATGGGC	chromosome03	2123470	2123609	minus	AC	CT	0	0	2	0	2	null	null	intergenic-intergenic	null	null	null	null	null	null	null	null
Os03circ02698	HWI-ST620_0167:7:2306:7090:39954#0/1_A_CGGCGCCGGACCAGTTCGTGACGTTGTTGGACGCCTCCACCGTCCCCTGGTGGAGCTTGTCCTGGAGGTAGACGAGGACGGTGGAGGAGAAGAGGATGCC	chromosome03	2132418	2135254	minus	AC	CT	2	0	0	0	2	null	null	cds-cds	null	null	null	null	null	null	null	null
Os03circ18779	HWI-ST620_0167:5:2308:13292:186408#0/1_A_CCACCACCGAGAATGCCGCCGACTTGGGGTTCCCAGCACCGAGCTCATTGCTCAGGATGACAAGCGAGATTACCAGCGACAGAAAGAACGACAGCACCGT	chromosome03	21607293	21607397	minus	AC	CT	2	0	0	0	2	null	null	cds-cds	null	null	null	null	null	null	null	null
Os03circ19029	HWI-ST620_0166:6:1204:11022:36400#0/2_A_CTACAATGACTTCTCGACCCCGGTGGATATTCCAATGGACACTAGCAAGGATATGAAAACAAGGGAGAAGGAACTTTCGCCTCTTCCTCCTGAGCCAGCT	chromosome03	22229527	22229722	plus	AG	GT	0	0	2	0	2	null	null	intergenic-intergenic	null	null	null	null	null	null	null	null
Os03circ19077	HWI-ST620_0167:6:1308:17202:13862#0/1_A_CAGGCGAATCATTCATATCTTCAACGAAAAAAAACAATCAGCTGCTGACACACTCCGATGACAACATGCTATTACATACATACAGTACTAGTAACGAATC	chromosome03	22447076	22447288	plus	AG	GT	2	0	0	0	2	Tc1/Mariner	null	cds-intron	null	null	null	null	null	null	null	null
Os03circ19142	HWI-ST620_0167:7:1201:13169:141210#0/1_A_CTCAGGTTCTGGTGGCTCATCCTCATACCCCATGTCCATGTCGTTGTAGCCGTCGTCCGCCATGGCTTCCGTCAGGGAAGTACCGCCTAATTGTGAATGG	chromosome03	22448906	22452101	minus	AC	CT	2	0	0	0	2	null	null	5utr-cds	chromosome03	22448906	-	Os03t0586600-01	null	null	null	null
Os03circ19181	HWI-ST620_0167:6:2206:4902:108683#0/1_A_TTGCAAGAGAGGGTTTCGAACTTGAATAACCAAGAGCGCCCATTGGATCTCTCCTCAACAGCCTTGAAAACTTGTGGTGCACCACAGAAGTTAATAGTGC	chromosome03	22463011	22465167	minus	AC	CT	1	0	1	0	2	Mutator	null	cds-cds	chromosome03	22463011	-	Os03t0586700-01	chromosome03	22465167	-	Os03t0586700-01
Os03circ19227	HWI-ST620_0167:7:2105:18411:142102#0/2_A_CGAGCAGATAACAGCAGCTTAGCAGGAGATATTCGCAAAGAAATGAAGGATGCACTAGTTCAACTTAGTAAGGGCATTCAAACAGGCCCTTCAGCAAACC	chromosome03	22486183	22487893	plus	AG	GT	2	0	0	0	2	null	null	cds-cds	null	null	null	null	chromosome03	22487893	+	Os03t0586900-01
Os03circ19587	HWI-ST620_0167:6:1202:17765:115808#0/1_A_GTCATCATCATCAAATTTCTTGCTAGAACTCTTGGGTGTGCTTCCTGTCTTGTGGCTGCTCCCTGTTGCAGCCTTCTTTTTACTAGCGGTATCTTTTGCA	chromosome03	23032962	23033445	minus	AC	CT	2	0	0	0	2	null	null	3utr-3utr OR cds-intergenic	null	null	null	null	null	null	null	null
Os03circ19615	HWI-ST620_0167:4:1106:16907:87134#0/2_A_GCAACAGGGAGCAGCCACAAGACAGGAAACACCGAAGAACAAGAAGGCAAGAAGTGCAAGGGATAGAAGCCAAGGTAAGGATAAGAAACAGGATGGGTCC	chromosome03	23032962	23036555	minus	AC	CT	2	0	0	0	2	null	null	cds-intergenic OR intergenic-cds OR intergenic-3utr	null	null	null	null	null	null	null	null
Os03circ19657	HWI-ST620_0167:4:1208:17926:40447#0/1_A_TCCTTCCTCGTTGTCATTATCAGCAGAGCCCTTTTCCTCTGCTTCCTTTCTGATGTTTGCTTTTGGAGTCGGAATAGCAAGGATCCAACAGAGTTCCAAC	chromosome03	23033815	23036723	minus	AC	CT	2	0	0	0	2	null	null	cds-cds OR intergenic-3utr	chromosome03	23033815	-	Os03t0596900-02	null	null	null	null
Os03circ19706	HWI-ST620_0167:5:1208:14895:37129#0/2_A_TGATGAACATCTGAAAAAAGATGGTGGAATTGAAGGAGCAAGATAAAAGTGGTTCTGAAAAGCAGGAGGAATTGAAGGAGCAAGATAAAAGTGGTTTAGC	chromosome03	23036636	23036858	minus	AC	CT	2	0	0	0	2	null	null	cds-cds	null	null	null	null	null	null	null	null
Os03circ19738	HWI-ST620_0167:5:2208:1815:155551#0/2_A_CTTGCTATTCCGACTCCAAAAGCAAACATCAGAAAGGAAGATAAAGATGAGAACACCAATACGGAGAAGCAGGAATTGAAAGATGCAAAAGAAAGTGGTT	chromosome03	23033815	23036933	minus	AC	CT	2	0	0	0	2	null	null	cds-cds OR intergenic-3utr	chromosome03	23033815	-	Os03t0596900-02	null	null	null	null
Os03circ19808	HWI-ST620_0167:5:1208:5004:192313#0/1_A_CCTTCTGTGTCCTTGGTATTCTTTTCTTCATTTGCACTTCTTGCCTTCTTGTTCTTAGGTGTTTCCTCCTTATTCTCTTCTACCTTCTTGTCTGCTTCAC	chromosome03	23036528	23037040	minus	AC	CT	2	0	0	0	2	null	null	cds-cds	null	null	null	null	null	null	null	null
Os03circ19884	HWI-ST620_0167:7:2304:9905:4714#0/2_A_GGAAGATAAAGATGAGAACACCAATACGGAGAAGCAGGAATTGAAAGATGCAAAAGAAAGTGGCTGAGACTGCAAAGGAGAGTGATGTGAAGCAGTTGGA	chromosome03	23036873	23037116	minus	AC	CT	2	0	0	0	2	null	null	cds-cds	null	null	null	null	null	null	null	null
Os03circ19962	HWI-ST620_0167:4:1203:15948:49569#0/1_A_CCATTGCCGATGCTGGGTCTTCCTCAGGCATCCCGAGAAACCCTTATTGCACTACCTTCTTGTCTGCTTCACTGACCTCCTCTTCTTCTGCTTCATCTTT	chromosome03	23036574	23037362	minus	AC	CT	1	1	0	0	2	null	null	5utr-cds	null	null	null	null	chromosome03	23037362	-	Os03t0596900-02
Os03circ20451	HWI-ST620_0171:3:1204:16069:129757#0/1_A_CTCAAAAGCGGCAGTCTTTAGTTTGAGTGTTAGTGTCCTTCCTTCTGGAACAAATAAGTTCTTTTCATGCAAAAACAATGCCTGATCATCCATGGAATCA	chromosome03	24149925	24150853	minus	AC	CT	0	2	0	0	2	null	null	intergenic-intergenic	null	null	null	null	null	null	null	null
Os03circ20675	HWI-ST620_0166:7:1302:19535:27575#0/1_A_TGCTAATTTGCACAGCTGTGGGCACTCATTTATGTCCTGAAACCCCATCTGCCTAGCTTGTAGCTTCCAACACGAGGTTCCTTAGCTTCTTCTTGCTGGC	chromosome03	24801474	24802633	plus	AG	GT	1	0	1	0	2	null	null	cds-cds	chromosome03	24801474	+	Os03t0628800-01	chromosome03	24802633	+	Os03t0628800-01
Os03circ20834	HWI-ST620_0167:5:1305:14726:52663#0/2_A_TGCAAAGAAAGGCTCATGGTATAGCTACAAAGAAATGAGATACGGCCCATTGGCAAGATAAAATCTGCCAAGGGAGATGAAGATGTGGGTGTGAAGGTTC	chromosome03	25405037	25405488	plus	AG	GT	2	0	0	0	2	null	null	cds-cds	null	null	null	null	chromosome03	25405488	+	Os03t0639700-01
Os03circ20876	HWI-ST620_0167:7:2202:10555:7621#0/2_A_GAGGGATTGGAAGATTTGGCAAGTGGTCATAACCCCAAGAAAGGCTGAAAAAGGTACGCCAACTATATCGGGTAAATCAAAGATCAAGTCCAAAGACAAA	chromosome03	25540351	25540746	plus	AG	GT	2	0	0	0	2	null	null	cds-cds-acrossGene	chromosome03	25540351	+	Os03t0641700-01	chromosome03	25540746	+	Os03t0641700-02
Os03circ20877	HWI-ST620_0167:7:1107:13801:83882#0/1_A_CTCCGATCTTTATGGCGATGTTTGTGCTTATTCTGATCCTTGTACTTGTCCTTGTCTTTCTTGGAGTTATGACCACTTGCCAAATCTTCCAATCCCTCTT	chromosome03	25540439	25540746	plus	AG	GT	1	1	0	0	2	null	null	cds-cds-acrossGene	null	null	null	null	chromosome03	25540746	+	Os03t0641700-02
Os03circ20883	HWI-ST620_0171:3:1204:10814:166450#0/2_A_TAGCTTTGAAGTTCTTGCTTGGCAATATCACTTCCCGAAGGGGGACCGTGGACATGCACACTACAAATGTCAGGGTTTAATCGGATGGGTTCTGATGGCA	chromosome03	25539271	25540999	plus	AG	GT	0	2	0	0	2	null	null	cds-3utr-acrossGene	chromosome03	25539271	+	Os03t0641700-01	chromosome03	25540999	+	Os03t0641700-02
Os03circ03115	HWI-ST620_0177:6:2204:11208:127123#0/1_A_GCCATGCCCGGAATGCCAAAACAAAACGGTCAGCCTGCGTGGGTGTAAACGTGATCTTTGTGTCTTCTTGGCTAGGATTTCCAAACCAGTCAGGTTGGCT	chromosome03	2578168	2578284	plus	AG	GT	0	0	2	0	2	null	null	cds-cds	null	null	null	null	null	null	null	null
Os03circ00191	HWI-ST620_0177:7:2101:13709:78095#0/1_A_GGTAGGTGGTAACAAATTTATTTAGTGGGCGCCATCATCAAGAAAATCCAACTACTGTGATCTTAACAAAACTAACTCTAAACTTGAGGAATAGCTAAGC	chromosome03	263000	263348	minus	AC	CT	1	0	1	0	2	null	null	intergenic-intergenic	null	null	null	null	null	null	null	null
Os03circ03229	HWI-ST620_0171:3:1101:14000:58958#0/1_A_GGAGTGGTGGTGGTGGCGAGAATAAAGCGGAGGTGGATGGCGGCATAGGCGTCCTCCGGCGAGATGACACGGAAGAGGACCATGAGCATGGCGCCAAGGA	chromosome03	2653097	2654312	plus	AG	GT	0	2	0	0	2	null	null	intergenic-intergenic	null	null	null	null	null	null	null	null
Os03circ21775	HWI-ST620_0177:8:1301:14970:125854#0/1_A_CAGAGGGAGGGCGAGAGGAAGGAAAACATACAGGAGAACACCATAGCAAGTAAACAAGATGCAATGCAGCATAAAGCAGTATCATTCTCATGCCACAAGT	chromosome03	27047623	27050906	plus	AG	GT	1	1	0	0	2	null	null	intron-intron	null	null	null	null	null	null	null	null
Os03circ21860	HWI-ST620_0167:4:1205:4454:110472#0/2_A_GTGTACAGGAAGTTGGGACAAGAATTTGAAGATTATTTGACGTGAGAACAGGGCACCAACTTCAAGTATACAGTCGGGAACCTGATAGAAATGATAATGA	chromosome03	27210511	27211403	minus	AC	CT	2	0	0	0	2	null	null	cds-cds	chromosome03	27210511	-	Os03t0669200-01	null	null	null	null
Os03circ21995	HWI-ST620_0173:6:1102:19689:15711#0/1_A_GAAAAGGTAAAGAGGGGGAGGAGAAGCCAACCCACCTCCTCCGTAGCCGCCGCCTCCACGACCGCCGCCGTAGCCGCCACCGCCGCCGCCGTAGCCCCCG	chromosome03	27271050	27271720	plus	AG	GT	2	0	0	0	2	Tc1/Mariner	null	5utr-cds OR intergenic-intron	null	null	null	null	null	null	null	null
Os03circ00236	HWI-ST620_0177:8:2305:18818:97437#0/1_A_CGCCTGGGAGCGCAACAACACCGCTGAAACCACATTGAGATTTTCTTGGAGCCATTTGGAGTTCTTGGGGCTGCTATGACTAACCCACCACCACGAATAC	chromosome03	270169	273549	plus	AG	GT	0	1	0	1	2	null	null	cds-cds-acrossGene	chromosome03	270169	+	Os03t0103800-01	null	null	null	null
Os03circ22426	HWI-ST620_0171:3:1203:1544:93012#0/1_A_GCTGTTGACTGGTCAGTCACTGAAGCTGCTCTAGGCCTTGAACAAGTGAAGTTAGCGCTCCTGTCCTGCACATCTTTTGCCCAAGCTCGGCGTGTGAGTT	chromosome03	27764347	27766209	plus	AG	GT	1	1	0	0	2	Mutator	null	cds-cds	null	null	null	null	chromosome03	27766209	+	Os03t0679700-03
Os03circ22610	HWI-ST620_0167:4:1201:13366:68266#0/2_A_TGCTAGCGAGACAAACTGGCTTAACAAGAAGTCAGATCAATGTTATCCGGAAGAAACTTGGAGAGGAGGAGAGTTCATCTGGCAAAGAGGGAAAATTAAC	chromosome03	27870054	27870411	minus	AC	CT	2	0	0	0	2	Tc1/Mariner	null	cds-cds OR intron-intron	chromosome03	27870054	-	Os03t0680800-01	null	null	null	null
Os03circ22710	HWI-ST620_0167:5:1304:16622:124732#0/1_A_GGGGATTTGGAGGAGGGGGAGATGGTGTGGGGCCCGCGGGGCAGGGAGGGGGGAGGAGGATTGAAGAAAAGAAGAGTTTCTCAGTACCGTAGCAGGACGT	chromosome03	27935668	27941663	plus	AG	GT	2	0	0	0	2	null	Tc1/Mariner	intergenic-intergenic	null	null	null	null	null	null	null	null
Os03circ22915	HWI-ST620_0171:6:1106:15040:94240#0/2_A_CTCGGCATCCCCACCGCGCTCATGCTCCTCGCCTGCGTCCTCTTTACTTCACCTTCACCTCCGCCATGCTCGTCTCCGCCACCGTCATCATCTACGTCCA	chromosome03	28225826	28225950	plus	AG	GT	0	0	0	2	2	null	PIF/Harbinger	intergenic-intergenic	null	null	null	null	null	null	null	null
Os03circ22993	HWI-ST620_0177:6:2106:15468:139974#0/1_A_CTAGCAAGTCTTGTAGTTGCACGGCACTTTTCAGTTTTGTCTCCTCCAGTACTGCTTTGACTTGACGAAGCTTTTCAATATGCTCCAAATCCTCAGCATC	chromosome03	28305778	28306054	plus	AG	GT	0	0	2	0	2	null	null	cds-cds	chromosome03	28305778	+	Os03t0689100-01	chromosome03	28306054	+	Os03t0689100-01
Os03circ23047	HWI-ST620_0177:6:1105:13694:18778#0/2_A_GCTGGGAGCCTCAAATCCGTTCCTGCTATCCTGGGCATATAGTGCACGCACTCAGTGAAAGCTTGGGCCTTCCACTTCATTTCAAGATGGATTTCTATGG	chromosome03	28395029	28399691	minus	AC	CT	0	0	2	0	2	null	null	3utr-intergenic	null	null	null	null	chromosome03	28399691	-	Os03t0690600-01
Os03circ03505	HWI-ST620_0171:3:2303:4927:180452#0/1_A_TAGAAGTCGGCGGAGAGCTGGGCGGTGGCGAGCAGTGGCGCTTGGTTTTCATCCTCGGAGGCCGCAGCAGCCGTCTTCCCCTCACCGGCCGCCAACCTTT	chromosome03	2877912	2879169	minus	AC	CT	0	2	0	0	2	Mutator	null	intergenic-intergenic	null	null	null	null	null	null	null	null
Os03circ23510	HWI-ST620_0171:1:1204:17910:123877#0/1_A_GCCGATCTGCTCAGGTATGCCACCAGTAATCTTATTACCAGGCAAGGACAGAATTTGGAGCTTTGAAAGCTGGCCAAGAGAAGCCGGTATTGGTCCAACC	chromosome03	29068453	29068596	minus	AC	CT	0	0	1	1	2	null	null	cds-cds	chromosome03	29068453	-	Os03t0703200-01	chromosome03	29068596	-	Os03t0703200-01
Os03circ23614	HWI-ST620_0166:7:2101:5794:166234#0/2_A_CCTACCTTATTGATCGCGCTTATGAATGGGGGAAAAGGAAGGAAGTGCTAGTGAATCTGATGATTATAATGAACCACAAGATCCAGCTGAAGACGAAACT	chromosome03	29144845	29145284	plus	AG	GT	0	0	2	0	2	hAT	null	5utr-cds	chromosome03	29144845	+	Os03t0704700-01	chromosome03	29145284	+	Os03t0704700-01
Os03circ03571	HWI-ST620_0171:3:1302:3083:9913#0/2_A_CAGTGGAGTAACTACTGGAGATTTGGATGATGATGAAGGTGGAGCAAGAAAGTTGTATGTTGGAAATCTTCACTCAAATATTACTGAAGATCAATTGAGA	chromosome03	2925841	2926479	minus	AC	CT	0	2	0	0	2	Tc1/Mariner	null	intergenic-intergenic	null	null	null	null	null	null	null	null
Os03circ03574	HWI-ST620_0167:5:2105:16945:166249#0/1_A_GGGGGTGAACAAAAACGGTTTTACTAAACCATTTGACCCAGTGTTGCACATGCATGCATGCAGCTGCTCCCCCAAAAAGATCTTGTATTCCATCTTAGTC	chromosome03	2926885	2928931	minus	AC	CT	2	0	0	0	2	null	null	intergenic-intergenic	null	null	null	null	null	null	null	null
Os03circ23709	HWI-ST620_0171:6:2201:20709:107930#0/1_A_GCGTGTACCGCTTCCGCCCCGCGGACAGCACCCTCCTCGACGCCGCCTTCGCCGACCTTCTGCACGCCCCGCTGGCCGCGTCCCAGGGCGGCGCCATGCG	chromosome03	29324653	29324790	minus	AC	CT	0	0	0	2	2	null	null	intergenic-intergenic	null	null	null	null	null	null	null	null
Os03circ23761	HWI-ST620_0167:5:1101:1710:37569#0/1_A_CAGCGACTCGGTGAACCGGTCGAGGAATGAGCCGGAGTTGTGGTTGGCCTCCTGCTCTACCACGGTCGGCCTGGCCGGAGCTGCCGCCCTCGAGGGAATC	chromosome03	29325271	29325391	minus	AC	CT	2	0	0	0	2	null	null	intergenic-intergenic	null	null	null	null	null	null	null	null
Os03circ24305	HWI-ST620_0171:6:2305:18531:86727#0/1_A_CGGCGCGGCGTCCCCTCCTTCTCCTCCTCCTACGACACGCAGCTCGCCGNGGACCTCTCCGCGTCGGAGCTCTCGCGCTCCACCACGGACACGGACACCA	chromosome03	29770352	29770477	plus	AG	GT	0	0	0	2	2	null	null	cds-cds	null	null	null	null	null	null	null	null
Os03circ24571	HWI-ST620_0171:8:1304:5987:19201#0/1_A_TGCATTCTTCTGCTGTCATCCTTGTCTGATGGATCATGGTTTGCACCTCAAATTTCACTTCCTTCTCTTCTTTGCCTTGCAAAGCTAAATACAGCATCCT	chromosome03	29981895	29982596	minus	AC	CT	0	2	0	0	2	null	null	cds-cds	null	null	null	null	null	null	null	null
Os03circ24629	HWI-ST620_0177:7:1103:9296:123479#0/1_A_CTTGCAGATAACTGAAATGTTCGGAGAGATCAATTCAATAAAGAATATCTTCTGTTGTTTCAACCTTCTCTGCAACCTCTTCTCAAACTCAAGGAATGCA	chromosome03	30065246	30065763	plus	AG	GT	0	0	2	0	2	null	null	intergenic-intergenic	null	null	null	null	null	null	null	null
Os03circ25064	HWI-ST620_0177:8:1304:10600:143364#0/1_A_CATTCTCTTCATCCTCAATCCGTTCATCCAGCGTTGATGAGTCAGCCTCCAGCTTAGTAGGCAGGTCCTACAGACTTACAGGTTACACCAGAAGCTAACC	chromosome03	30369230	30370300	minus	AC	CT	0	2	0	0	2	null	null	intergenic-intergenic	null	null	null	null	null	null	null	null
Os03circ25078	HWI-ST620_0171:2:1202:2788:179776#0/1_A_CCATGCTCATGCTCGGGATCACAATCGGAGTCGAGCTCAGCGTCATCTTCCCCTAAACCTGCAGGTGTCGCATCCGACCAAGGAGGCGCCGGTCATCGAC	chromosome03	30375982	30376106	plus	AG	GT	0	0	0	2	2	null	null	intergenic-intergenic	null	null	null	null	null	null	null	null
Os03circ25256	HWI-ST620_0166:8:1208:1877:53252#0/2_A_GCCCTATAGTAAGCTATAGTGGGGACCTGCCCAAATGGGCTCAATATTTCCATCAAGCTAATAAAGATTATTTTGATTCTGTTCTTGACTCAAGGAGCCT	chromosome03	30749018	30753374	plus	AG	GT	0	0	2	0	2	null	null	cds-cds	chromosome03	30749018	+	Os03t0731500-02	chromosome03	30753374	+	Os03t0731500-02
Os03circ25278	HWI-ST620_0166:6:2108:20933:67525#0/1_A_CTTCAGTTTCTCCTTTAAGCATTATAGTGTTGAAGGCAATGAAGTGGTCATTGACATTCTCAACTCCAAACCTACGCATCATTGTCTTCTCAACAAGCTT	chromosome03	30762843	30763069	plus	AG	GT	0	0	2	0	2	null	null	intergenic-intergenic	null	null	null	null	null	null	null	null
Os03circ25339	HWI-ST620_0171:3:1304:11439:79506#0/1_A_CGCCGGATGCCGGTGGTGGTGGTGGTACATTGCATCTTGTCTTTCCTGTGTGGCATCACAGATAGTGTTGAAGGCAATGAAGTGGTCATTGACATTCTCA	chromosome03	30762638	30764801	plus	AG	GT	0	2	0	0	2	null	Tc1/Mariner || PIF/Harbinger	intergenic-intergenic	null	null	null	null	null	null	null	null
Os03circ03633	HWI-ST620_0167:5:2101:3463:194893#0/2_A_CTTAGCATGTTGACCGTCTTCCTCAGCATCATTGCTGCTCAGGATTGGATTTGTGACTCAAGATGATGTTCTTTTTACTCATCTTACTGTAAAGGAGACA	chromosome03	3080238	3081870	minus	AC	CT	1	0	1	0	2	PIF/Harbinger	null	cds-cds OR 5utr-intergenic	chromosome03	3080238	-	Os03t0157400-01	chromosome03	3081870	-	Os03t0157400-02
Os03circ25503	HWI-ST620_0166:7:2205:19327:49890#0/2_A_CGGGGAGAATACAAAGATTCAGAACTGCATAAACCTCAAGGATACAGTAATGCTTGGTGCTGATTTCTATGAGACTGATCTGGAAAGAGGAGAACTGCTG	chromosome03	30911500	30914742	minus	AC	CT	1	0	1	0	2	Tc1/Mariner	null	cds-cds	chromosome03	30911500	-	Os03t0735000-02	null	null	null	null
Os03circ25525	HWI-ST620_0171:8:2203:4303:179554#0/1_A_CATAGTACCCACCACCTTGGTTGTACCCACCTTGATTGTTTCCATATCCACCATAACCACCATAACCTCGCGCTCAGGGCAAACAACAAACCAAACATGA	chromosome03	30930814	30931929	minus	AC	CT	0	2	0	0	2	null	null	cds-3utr	null	null	null	null	null	null	null	null
Os03circ25574	HWI-ST620_0171:4:2206:18281:78122#0/1_A_CACAAACTCATCCCAGTAACTGGTGGAATTGTAGAAAATTGCTTGATCAGAGCCATTGGGGCTGTATCATTCCTCCTTTGGTAAAGTTGAATGAATTGTA	chromosome03	30993749	30994352	minus	AC	CT	0	1	0	1	2	null	null	cds-cds	chromosome03	30993749	-	Os03t0736300-01	null	null	null	null
Os03circ25770	HWI-ST620_0167:7:2302:16845:94167#0/2_A_CTTTTCCAGACATAATACTTACACCCCAAATGTAACTGCGATTTGTTTGAGGAAAGGTGTGTCAAGGTGGAGATCCGATGAGTCTAGTGAAGACGAAGAT	chromosome03	31026546	31026779	minus	AC	CT	2	0	0	0	2	Tc1/Mariner	null	intergenic-ncRNA	null	null	null	null	null	null	null	null
Os03circ25796	HWI-ST620_0177:6:2306:2894:50191#0/1_A_GGGGGAGAAGAAGAAGTAGTAGGCGTGGGGGAGTCGGGTCGCAGGCATGGACTCGCCGGAGCTGCCGGTCGGGCGCGTGCGCCGAGGCCGCGTCGTCGGA	chromosome03	31057620	31058104	plus	AG	GT	1	0	1	0	2	null	PIF/Harbinger	intergenic-intergenic	null	null	null	null	null	null	null	null
Os03circ25810	HWI-ST620_0171:7:2301:5596:189563#0/1_A_CGGAGGAGATTGCGTGTACGATGTAGTTTCTCTATGTTTTCCAAGTAACTCTGTATTGCCATCTATAAGATGATGAAATTCCTGCAGGAGATCTATACAT	chromosome03	31061337	31066261	plus	AG	GT	0	2	0	0	2	null	null	cds-cds	null	null	null	null	null	null	null	null
Os03circ25819	HWI-ST620_0177:8:1208:3239:166925#0/1_A_CGCCTTCCGCTGCTCGTCCTCCTCCCCTCCTCCAATTGATCAGGTCCTCCATAAATATAGAAGCATCTGTCAAATGACACTTCTTCAAACTGCTCCTCTT	chromosome03	31071564	31072774	minus	AC	CT	1	1	0	0	2	null	null	cds-cds	chromosome03	31071564	-	Os03t0737900-01	null	null	null	null
Os03circ25831	HWI-ST620_0166:8:2202:1401:29974#0/2_A_CTTTATTGCATCTTTGCATTTGAAGAAACCACTGAACTGGCATGCCCAAATAGAACTAATCAATCGCCAGCGGAGAGGAGCTAAATAAGGCTAAACTGAT	chromosome03	31081486	31081652	minus	AC	CT	0	0	2	0	2	null	null	intergenic-intergenic	null	null	null	null	null	null	null	null
Os03circ25990	HWI-ST620_0167:5:2107:11459:139847#0/2_A_CCATTTAGTGTTGGTAAATCTCAAGAGCAAGGGCATAGATGGTTCAAGAGTGGAGAAAAGTGCCGTTCTTTTTAGGCCAAAGTTGATCGTTGCGGGTGCA	chromosome03	31112702	31114023	plus	AG	GT	2	0	0	0	2	null	null	cds-cds	chromosome03	31112702	+	Os03t0738400-01	null	null	null	null
Os03circ25994	HWI-ST620_0173:6:1304:20395:126852#0/1_A_TGCCATATCTGCTAGAAGTATTGCCTTCTGCTTGTCACAAACCTTCCCCACTCTTGAACCATCTATGCCCTTGCTCTTGAGATTTACCAACACTAAATGG	chromosome03	31112878	31114032	plus	AG	GT	2	0	0	0	2	null	null	cds-cds	chromosome03	31112878	+	Os03t0738400-01	null	null	null	null
Os03circ26019	HWI-ST620_0166:6:1104:9544:175196#0/2_A_GCTAAGGTTGCTGATTTCTTCGATGCAGCAGTGAACTTGGCTTTGAAGGTTAAGGCTGCAGCAGACTGATACTAAGAAGATTTCAGCAGTTTCGATATTC	chromosome03	31112359	31114310	plus	AG	GT	0	0	2	0	2	null	null	cds-cds	chromosome03	31112359	+	Os03t0738400-01	chromosome03	31114310	+	Os03t0738400-01
Os03circ26245	HWI-ST620_0166:8:1203:17831:37537#0/2_A_GCACTGTGTCTCTATCAGTCATTGGTTTTCGATAACCCGATGAGGAGCGATTTTCTACTCGAAAACGGAAAGGAAACGATTTGGAGCGCTTTTGGGTTGG	chromosome03	31356849	31357459	plus	AG	GT	0	0	1	1	2	null	PIF/Harbinger	intergenic-intergenic	null	null	null	null	null	null	null	null
Os03circ26421	HWI-ST620_0173:6:2307:11305:87694#0/2_A_CGAAAGAAATGGTGAATGAAAACGAGGCCCCAGGCCGGGCGGCAGGGAGACGGTGGTGTGGTCCGAGAAGATGAACGAGTATCTCATCGACGCGTTGCTG	chromosome03	31543307	31544008	minus	AC	CT	2	0	0	0	2	PIF/Harbinger	null	intergenic-intergenic	null	null	null	null	null	null	null	null
Os03circ26429	HWI-ST620_0171:8:2203:19004:111380#0/1_A_GGTTGGTGCGATCTTACCAGCGAAGAAGCGTAGCGAGAGGTTCTCGCATTCATGGAAGTTCTCCTTGATGGGCTTGAGACGGTTCTTGATGTTTGACCTG	chromosome03	31543773	31544369	plus	AG	GT	0	2	0	0	2	null	null	intergenic-intergenic	null	null	null	null	null	null	null	null
Os03circ26579	HWI-ST620_0177:7:2108:4428:9502#0/1_A_GCATCTATATCACTGAATTCATATTTCTCAACCAAAACCTTGTTGAGCGGCCAAAACCGCAAGCGCCGAATTTGAGCGGCTGAAGGACGCTTTTCAGGAA	chromosome03	31617701	31617841	minus	AC	CT	0	0	2	0	2	null	null	intergenic-intergenic	null	null	null	null	null	null	null	null
Os03circ26976	HWI-ST620_0171:1:2306:10401:112015#0/2_A_GCCTGATTGTGTTCATGTATCACTCAAGGTGGAGAGACAGGTTACCTGCAAAACCAGCATATTATAATGGTGAGAAGTGGGGCCTATGGTTTCTACACAA	chromosome03	32119959	32120171	plus	AG	GT	0	0	0	2	2	null	Tc1/Mariner	intergenic-intergenic	null	null	null	null	null	null	null	null
Os03circ27096	HWI-ST620_0171:3:2305:6080:50007#0/2_A_TGTTATTTCTGAGGACAAAGCGGTTTCTCTTCTGCTAGTTAGACATGGTGCTAATGTTGATTTGACAACCGATGCTGGCCGGACTGCTCTTCATTATGCT	chromosome03	32254521	32255686	plus	AG	GT	1	1	0	0	2	null	null	cds-cds OR intergenic-3utr	chromosome03	32254521	+	Os03t0758400-02	null	null	null	null
Os03circ27111	HWI-ST620_0171:8:1102:9333:95919#0/2_A_GCTGGTTCCATTCCACGGCAACGGGGGATCGTATATAAGCAATGCAGGCGTCTTGTTTTCATTAGCTAGAAAGGGACCAAACAACACCCATCCAAGAACC	chromosome03	32273379	32275116	plus	AG	GT	0	2	0	0	2	null	null	intergenic-intergenic	null	null	null	null	null	null	null	null
Os03circ27183	HWI-ST620_0166:8:2301:14046:70165#0/2_A_CATGGATTCTTTTCATTTGGAGTTCTGCTGGATGGAATCACCAGGAAAGAGGCAGCGGCTTGTGCGGAATGGGATATCCGACAGACATCGGTAAGATTGT	chromosome03	32292055	32292160	minus	AC	CT	0	0	2	0	2	null	null	intergenic-intergenic	null	null	null	null	null	null	null	null
Os03circ27364	HWI-ST620_0166:7:1206:5863:155132#0/2_A_CATTTCCCCAACGCTTCAAGAGTTTGTTGGTGCCTCTGAGTTAGCTAGGACAGAGATCAGATGGAGCCAATACTGATGGCAAGAGAAAAGGTGGTGGCTT	chromosome03	32524156	32524270	plus	AG	GT	0	0	2	0	2	Tc1/Mariner	null	intron-cds	null	null	null	null	chromosome03	32524270	+	Os03t0764450-00
Os03circ27628	HWI-ST620_0167:6:1303:8233:59354#0/1_A_GATTTTTTTCTCATTGACGCTAATCAATTCTGGCACATTGTTCTGTTGTAAATTTGTTATGTAGTTACATTGTCAGTTCAGTTTCTTCTCGGTATATTGT	chromosome03	32759158	32759484	minus	AC	CT	2	0	0	0	2	null	null	cds-3utr	null	null	null	null	null	null	null	null
Os03circ27925	HWI-ST620_0173:6:2105:4344:160887#0/2_A_CAGGAGCAGGCTCTGCAACTTTGTCAATGGCTTTTGCTGCAGCAAAATTTGGTGATGCATGCTTGCGAGCAATGCGTGGTGAGGCCGGCGCCATGCAGGG	chromosome03	32985162	32987793	minus	AC	CT	2	0	0	0	2	null	null	cds-cds	null	null	null	null	null	null	null	null
Os03circ28130	HWI-ST620_0171:4:2102:16543:133850#0/2_A_GGAAATGGAAGAGGAGGTACAAGTGGAGGTGCAGGATGGTGCTGCAGGCAAGAGGAAGAGGGGCGCCAATAATAAGAGGAATCCCAACCCTGTGAAAAAT	chromosome03	33155431	33155760	minus	AC	CT	1	1	0	0	2	null	null	intergenic-intergenic	null	null	null	null	null	null	null	null
Os03circ28403	HWI-ST620_0167:7:2201:3911:37349#0/1_A_CACCCCAGAAGCAACTAAATTCTGTGCCTGCGCAATCGTCACCACATTACCTCCAATCAAGTCCACTTCCGCAATGACTGGCACATTGTGATCTTTGGCA	chromosome03	33265207	33266928	plus	AG	GT	1	1	0	0	2	null	null	cds-cds	null	null	null	null	null	null	null	null
Os03circ28490	HWI-ST620_0166:8:1104:6753:36991#0/2_A_CTCTACACGCAGCTCTGGCGCAGCGTCACCGGCGACGCGTTCCCGGCGGCCGCGGCGGCGGGGCCGAGCTCTCCGCGCGGTTCCCGGACACCCTCGACGA	chromosome03	33331953	33332068	minus	AC	CT	0	0	2	0	2	null	null	intergenic-intergenic	null	null	null	null	null	null	null	null
Os03circ28553	HWI-ST620_0171:7:1103:13532:147247#0/1_A_GCGCAAATAACGTAACCATTATAATTAGTCCGAAAATCGTGCCCATCAAAAATCTTCTCAGCAACAAAAATGTTCAAACCATGAACCGAGATATGGAAGT	chromosome03	33453866	33457327	plus	AG	GT	0	2	0	0	2	null	null	cds-cds	chromosome03	33453866	+	Os03t0784400-01	null	null	null	null
Os03circ28733	HWI-ST620_0167:6:2303:17955:158732#0/1_A_CTGACAAGCTGCTCAACCACATTCCTGTCCTTGTACACGTATAGCTGGAAGAAACGGATTCCTGGTCCATCTCTGCGAGGTCCAGGCCTTCGAAATTCTT	chromosome03	33529251	33529664	plus	AG	GT	2	0	0	0	2	null	null	cds-cds	null	null	null	null	chromosome03	33529664	+	Os03t0786100-02
Os03circ28923	HWI-ST620_0167:7:2101:9081:50327#0/2_A_CGTCCCGGCGACCATCAGCGCCCTGGAGGAGGGCGCCTCAACTGGACCAGGAATCCGTTTCTTCCAGCTATACGTGTACAAGGACAGGAATGTGGTTGAG	chromosome03	33529232	33530218	plus	AG	GT	2	0	0	0	2	null	null	cds-cds	null	null	null	null	null	null	null	null
Os03circ28928	HWI-ST620_0166:6:1207:1924:66701#0/1_A_CGCGCGCCGTGGTTCGACACGATGATCCCCGCCGCGCCGGAGTGCACGGCCAGCCTCCCACCTCCTCCAGGGCGCTGATGGTCGCCGGGACGTAGTCCAG	chromosome03	33530118	33530221	plus	AG	GT	0	0	2	0	2	null	null	cds-cds	chromosome03	33530118	+	Os03t0786100-02	null	null	null	null
Os03circ29691	HWI-ST620_0167:7:1303:2511:35202#0/2_A_CGTCCAGATCAAGAAGCTCGTCGCCGCCGGCAAGCTGACCAAGGTCAAGAACTCCTACAGGCTGCGGCCGCCGCGCCTTAGACCACGGCCACCGCCGGGG	chromosome03	34203167	34203557	plus	AG	GT	2	0	0	0	2	null	null	cds-cds	null	null	null	null	null	null	null	null
Os03circ30443	HWI-ST620_0167:5:1201:11022:167679#0/1_A_GGCTTGAGAGGGTGTGGATTAGGGTTCTTGGTGGATCCACGGGACGAGGTGAAGACATCCTCAATGCCGGCGAACTGCAGCACCTTCTTGGGCACGCGGG	chromosome03	34667580	34668251	minus	AC	CT	2	0	0	0	2	null	null	intergenic-intergenic	null	null	null	null	null	null	null	null
Os03circ30497	HWI-ST620_0173:6:1206:11407:9072#0/2_A_TTAGAAAGCATATCTGATTACTGAATAGTGCTTAGCAGCAACTGCTATGTACTCCAAAATGTAACTCAATAACTGATTATGAATTTATTTATGACTCTCA	chromosome03	34690070	34690518	minus	AC	CT	1	1	0	0	2	null	null	intron-intron	null	null	null	null	null	null	null	null
Os03circ30651	HWI-ST620_0166:6:2201:7423:80393#0/2_A_GATGTCTTATTTGTCCACTGCGATGTTTCGGGCATGGTGCAAAGGTATGTATTGCAGATATCCAAGATGAAGCAGGTCAGAAGCTCCGGGACTCCCTTGG	chromosome03	34838942	34839051	plus	AG	GT	0	0	2	0	2	null	null	cds-cds	null	null	null	null	null	null	null	null
Os03circ30787	HWI-ST620_0171:3:1204:17891:111128#0/2_A_CTGATGATAATGCACCACACTCTTCTGAGAGCTGAAGATAGTGCTAACCAACCTGGTAGTCCTATATTCTCTGCTTTGAGTGCACTTTTCTCAAATCCAT	chromosome03	34931841	34931961	plus	AG	GT	0	2	0	0	2	null	null	cds-3utr	null	null	null	null	chromosome03	34931961	+	Os03t0812200-01
Os03circ30915	HWI-ST620_0167:4:1206:12122:17517#0/1_A_CTCTTCTCATCCACATTTTCAGCTCCATTGTTCAAATTGGTCTCTTGTTCAGATACTTCATCATTCTCTCTACCTATGGATATTTCTATCTTATTCTCCA	chromosome03	35119197	35119797	plus	AG	GT	1	1	0	0	2	null	null	intergenic-intergenic	null	null	null	null	null	null	null	null
[truncated: 975 more rows]
