# Supplementary material for: Transcriptome-wide investigation of circular RNAs in rice
Source: RNA. 2015 Dec;21(12):2076–87. doi: 10.1261/rna.052282.115 (PMC4647462; doi:10.1261/rna.052282.115)
Supplement: Supplemental Material [file supp_052282.115_TableS3.xlsx]

## Sheet: otherPlant-circRNAs
Arabidopsis thaliana								Sorghum bicolor								Setaria italica								Zea mays								Brachypodium distachyon
chr.	exon-start	exon-end	depth	ori.	AG/AC	GT/CT		chr.	exon-start	exon-end	depth	ori.	AG/AC	GT/CT		chr.	exon-start	exon-end	depth	ori.	AG/AC	GT/CT		chr.	exon-start	exon-end	depth	ori.	AG/AC	GT/CT		chr.	exon-start	exon-end	depth	ori.	AG/AC	GT/CT
1	30059886	30064646	76	minus	AC	CT		3	55730983	55731498	10	plus	AG	GT		2	28371413	28371519	62	minus	AC	CT		3	12422622	12423240	274	plus	AG	GT		2	45264685	45264929	5	plus	AG	GT
2	17827012	17827158	31	plus	AG	GT		1	26434164	26434335	8	minus	AC	CT		3	5960971	5961084	24	minus	AC	CT		6	29352629	29355461	175	minus	AC	CT		4	35019627	35019749	4	plus	AG	GT
4	14088854	14089379	19	plus	AG	GT		5	18474761	18475015	7	minus	AC	CT		3	7446908	7447003	22	minus	AC	CT		5	42481714	42483709	158	minus	AC	CT		1	51801217	51801330	3	plus	AG	GT
5	5577415	5582816	17	minus	AC	CT		1	1178755	1178886	5	minus	AC	CT		9	6152595	6152748	18	plus	AG	GT		5	164768701	164768802	69	minus	AC	CT		3	16087696	16090156	3	plus	AG	GT
5	6753029	6757597	12	plus	AG	GT		1	2626831	2627012	5	minus	AC	CT		2	4104370	4104462	15	minus	AC	CT		5	164768690	164768802	60	minus	AC	CT		4	46761024	46761151	3	minus	AC	CT
4	14088753	14088909	10	plus	AG	GT		6	60416715	60422086	4	minus	AC	CT		4	2366295	2369332	14	minus	AC	CT		9	109326540	109332173	49	minus	AC	CT		5	25735926	25736027	3	minus	AC	CT
2	17826994	17827158	9	plus	AG	GT		10	2528713	2528844	3	plus	AG	GT		3	5960971	5961150	13	minus	AC	CT		scaffold_135	2974	3168	49	plus	AG	GT		1	13511548	13511651	2	plus	AG	GT
2	8687774	8690699	8	minus	AC	CT		1	69230476	69230568	3	plus	AG	GT		6	34713015	34714935	12	plus	AG	GT		10	19523537	19523650	35	minus	AC	CT		1	20665324	20665452	2	plus	AG	GT
2	6399779	6399907	7	minus	AC	CT		1	69230476	69230571	3	plus	AG	GT		1	154731	154848	10	minus	AC	CT		2	56736815	56736915	34	plus	AG	GT		1	25584909	25585032	2	minus	AC	CT
4	13607528	13611997	7	minus	AC	CT		3	68191524	68191620	3	plus	AG	GT		3	5960965	5961114	10	minus	AC	CT		7	8308314	8308891	32	plus	AG	GT		1	33694816	33694976	2	plus	AG	GT
5	17756603	17757327	6	minus	AC	CT		3	69975234	69975326	3	plus	AG	GT		6	35840988	35841122	8	plus	AG	GT		9	7310063	7310205	27	plus	AG	GT		1	41903683	41903790	2	minus	AC	CT
2	17138307	17138573	5	plus	AG	GT		3	8539875	8539997	3	plus	AG	GT		6	4704429	4704539	7	plus	AG	GT		scaffold_135	1037	3168	26	plus	AG	GT		1	52718034	52718134	2	plus	AG	GT
4	13607528	13609557	5	minus	AC	CT		5	4827578	4827664	3	minus	AC	CT		3	5961013	5961204	6	minus	AC	CT		5	40978307	40978429	21	plus	AG	GT		1	60115408	60115510	2	minus	AC	CT
4	16356636	16356818	5	plus	AG	GT		7	61363994	61368859	3	minus	AC	CT		9	42894836	42894997	6	plus	AG	GT		6	30249469	30254877	21	minus	AC	CT		1	60838678	60838807	2	minus	AC	CT
5	25182042	25184894	5	plus	AG	GT		8	41695194	41695993	3	minus	AC	CT		9	50187484	50188167	6	plus	AG	GT		7	4800425	4800538	21	minus	AC	CT		1	73307815	73307948	2	minus	AC	CT
2	16721875	16722027	4	plus	AG	GT		9	58618885	58619001	3	minus	AC	CT		1	26938431	26938526	5	plus	AG	GT		3	218346700	218346888	20	plus	AG	GT		1	8550523	8550728	2	plus	AG	GT
3	8173668	8173829	4	plus	AG	GT		10	1852958	1853075	2	plus	AG	GT		3	5960971	5961114	5	minus	AC	CT		9	136151722	136154127	20	minus	AC	CT		2	10439318	10439430	2	plus	AG	GT
3	9355539	9355880	4	minus	AC	CT		10	55871656	55871731	2	minus	AC	CT		3	8781158	8781386	5	minus	AC	CT		9	34143392	34143504	19	plus	AG	GT		2	34339076	34339264	2	minus	AC	CT
4	13609365	13609557	4	minus	AC	CT		10	58334032	58334142	2	plus	AG	GT		3	8781158	8781393	5	minus	AC	CT		2	203908295	203912599	17	plus	AG	GT		2	35944606	35944809	2	plus	AG	GT
4	14088761	14089290	4	plus	AG	GT		1	12385965	12386176	2	minus	AC	CT		8	26962460	26962598	5	plus	AG	GT		4	83200012	83200119	17	plus	AG	GT		2	37567278	37568243	2	minus	AC	CT
4	14088819	14089290	4	plus	AG	GT		1	14998902	14999066	2	minus	AC	CT		2	43005625	43005730	4	plus	AG	GT		6	25543917	25544024	17	minus	AC	CT		3	14311659	14311801	2	minus	AC	CT
4	16157076	16157243	4	minus	AC	CT		1	21743154	21743287	2	minus	AC	CT		5	46769486	46769610	4	minus	AC	CT		3	32241648	32241800	16	plus	AG	GT		3	39586027	39586177	2	minus	AC	CT
4	7760447	7760593	4	minus	AC	CT		1	48630188	48630305	2	plus	AG	GT		6	35210903	35211041	4	minus	AC	CT		7	157608619	157608735	16	minus	AC	CT		3	41693574	41695569	2	plus	AG	GT
4	7760495	7760680	4	minus	AC	CT		1	5598861	5598946	2	minus	AC	CT		6	4704024	4704182	4	minus	AC	CT		7	160296459	160296596	16	minus	AC	CT		3	48520820	48520931	2	minus	AC	CT
4	7760567	7760719	4	minus	AC	CT		1	56967268	56968111	2	minus	AC	CT		6	4704240	4704539	4	plus	AG	GT		9	103447044	103447151	16	plus	AG	GT		4	36397130	36397237	2	minus	AC	CT
5	17756348	17756596	4	plus	AG	GT		1	60543259	60543369	2	minus	AC	CT		7	35188729	35188869	4	minus	AC	CT		9	103447083	103447234	16	plus	AG	GT		4	42681154	42681255	2	plus	AG	GT
1	1301000	1301113	3	minus	AC	CT		1	61490955	61491052	2	minus	AC	CT		2	27990081	27990214	3	minus	AC	CT		10	36787318	36787449	13	plus	AG	GT
1	201172	201327	3	plus	AG	GT		1	62039674	62039773	2	minus	AC	CT		2	29321824	29321936	3	minus	AC	CT		1	203627212	203627368	13	minus	AC	CT
1	29346651	29346773	3	minus	AC	CT		1	63050376	63050484	2	plus	AG	GT		2	44864110	44864238	3	minus	AC	CT		10	36787318	36787461	12	plus	AG	GT
1	5448781	5448936	3	plus	AG	GT		1	63415302	63415385	2	minus	AC	CT		3	21273064	21273228	3	plus	AG	GT		6	89070611	89073405	12	minus	AC	CT
1	9670143	9670533	3	minus	AC	CT		1	65377	65460	2	minus	AC	CT		3	5960965	5961186	3	minus	AC	CT		7	157315434	157315589	12	plus	AG	GT
1	986854	987282	3	plus	AG	GT		1	66503567	66503670	2	plus	AG	GT		3	7621952	7622246	3	plus	AG	GT		1	187417639	187417752	11	plus	AG	GT
2	11714399	11714599	3	minus	AC	CT		1	8313923	8314026	2	minus	AC	CT		5	35398892	35399056	3	plus	AG	GT		1	222600393	222602866	11	minus	AC	CT
2	11817306	11818783	3	plus	AG	GT		2	3161964	3162086	2	plus	AG	GT		5	8711767	8711887	3	minus	AC	CT		3	222835713	222836259	11	plus	AG	GT
2	2216745	2216976	3	plus	AG	GT		2	37842963	37843043	2	plus	AG	GT		6	30499055	30499446	3	plus	AG	GT		10	10199106	10199217	10	minus	AC	CT
2	9569394	9569623	3	plus	AG	GT		2	4146216	4146296	2	plus	AG	GT		6	35840795	35841337	3	plus	AG	GT		10	21735412	21735516	10	plus	AG	GT
4	11457225	11460345	3	plus	AG	GT		2	4146297	4146485	2	plus	AG	GT		6	35841236	35841475	3	plus	AG	GT		1	178504262	178504375	10	minus	AC	CT
4	12593045	12593168	3	plus	AG	GT		2	4146501	4146683	2	plus	AG	GT		6	35841332	35841475	3	plus	AG	GT		3	221719730	221719846	10	plus	AG	GT
4	14089271	14089485	3	plus	AG	GT		2	59048106	59048222	2	minus	AC	CT		6	4704356	4704508	3	minus	AC	CT		6	146189837	146189948	10	plus	AG	GT
4	17999487	18000107	3	minus	AC	CT		2	60452788	60452874	2	plus	AG	GT		6	4704114	4704539	3	plus	AG	GT		4	177672900	177673101	9	minus	AC	CT
4	7760495	7760716	3	minus	AC	CT		2	63280603	63280683	2	plus	AG	GT		6	4704366	4704539	3	plus	AG	GT		4	237245277	237245435	9	minus	AC	CT
5	19399055	19399168	3	plus	AG	GT		2	66733016	66733114	2	plus	AG	GT		6	7507139	7511656	3	plus	AG	GT		5	178133182	178133291	9	minus	AC	CT
5	23882205	23882327	3	minus	AC	CT		2	73659223	73663885	2	minus	AC	CT		7	22844038	22844172	3	plus	AG	GT		6	146182728	146182937	9	plus	AG	GT
5	6761330	6763611	3	plus	AG	GT		3	15605286	15605388	2	plus	AG	GT		7	30401610	30401756	3	plus	AG	GT		6	157073442	157073545	9	minus	AC	CT
1	117738	118315	2	plus	AG	GT		3	66680411	66680747	2	plus	AG	GT		7	32384772	32390314	3	plus	AG	GT		7	157639415	157639528	9	plus	AG	GT
1	16129029	16129353	2	plus	AG	GT		3	67056373	67056453	2	minus	AC	CT		9	21324313	21324644	3	minus	AC	CT		7	167863601	167863735	9	plus	AG	GT
1	17617578	17623316	2	minus	AC	CT		3	71695055	71695881	2	plus	AG	GT		9	44317294	44317439	3	minus	AC	CT		9	103447560	103447733	9	plus	AG	GT
1	20968713	20969195	2	minus	AC	CT		3	72282326	72282408	2	plus	AG	GT		9	51169050	51169154	3	minus	AC	CT		10	36787330	36787461	8	plus	AG	GT
1	21129095	21129929	2	plus	AG	GT		3	72308714	72308847	2	plus	AG	GT		1	14077170	14077277	2	minus	AC	CT		3	182335708	182335835	8	plus	AG	GT
1	21237892	21239024	2	plus	AG	GT		4	187143	187235	2	plus	AG	GT		1	17210844	17211014	2	minus	AC	CT		5	14084787	14084900	8	minus	AC	CT
1	21239203	21239328	2	plus	AG	GT		4	54971193	54971612	2	minus	AC	CT		1	22073375	22076771	2	plus	AG	GT		5	199643821	199643926	8	plus	AG	GT
1	2258120	2258230	2	minus	AC	CT		4	56378666	56378828	2	minus	AC	CT		1	2348778	2348964	2	minus	AC	CT		9	7310063	7310187	8	plus	AG	GT
1	25391899	25392094	2	plus	AG	GT		4	60315773	60317187	2	plus	AG	GT		1	2348886	2349036	2	minus	AC	CT		10	4740916	4741026	7	plus	AG	GT
1	25392045	25392297	2	plus	AG	GT		4	8491594	8491790	2	plus	AG	GT		1	25524610	25524785	2	plus	AG	GT		10	90214881	90214985	7	minus	AC	CT
1	25648371	25648589	2	plus	AG	GT		6	53808006	53808091	2	minus	AC	CT		1	30483301	30483422	2	plus	AG	GT		1	38853316	38853559	7	minus	AC	CT
1	25789286	25789519	2	minus	AC	CT		6	58172698	58175939	2	plus	AG	GT		2	16388290	16389138	2	plus	AG	GT		2	199222272	199225401	7	plus	AG	GT
1	27243403	27243803	2	minus	AC	CT		6	6958944	6959025	2	minus	AC	CT		2	16498807	16499597	2	plus	AG	GT		2	2810023	2810127	7	plus	AG	GT
1	3121335	3121564	2	minus	AC	CT		7	63008191	63008311	2	plus	AG	GT		2	2130826	2131493	2	plus	AG	GT		4	180463700	180468115	7	plus	AG	GT
1	31273	31420	2	plus	AG	GT		7	7621452	7621563	2	minus	AC	CT		2	28371370	28371967	2	minus	AC	CT		5	9482673	9482813	7	minus	AC	CT
1	3492696	3492799	2	minus	AC	CT		7	7674960	7675061	2	minus	AC	CT		2	32383272	32383397	2	plus	AG	GT		6	164174250	164174512	7	plus	AG	GT
1	4908292	4908519	2	plus	AG	GT		8	15288545	15288643	2	plus	AG	GT		2	35580604	35580752	2	plus	AG	GT		6	29352295	29355461	7	minus	AC	CT
1	5448781	5448981	2	plus	AG	GT		8	3061330	3061435	2	minus	AC	CT		2	43636816	43636956	2	plus	AG	GT		scaffold_5	90	217	7	plus	AG	GT
1	5449648	5449839	2	plus	AG	GT		8	49002643	49002736	2	plus	AG	GT		2	43767090	43767256	2	minus	AC	CT		10	36787270	36787371	6	plus	AG	GT
1	5818149	5820512	2	plus	AG	GT		8	52136179	52136981	2	plus	AG	GT		2	44864116	44864238	2	minus	AC	CT		1	218721747	218721856	6	plus	AG	GT
1	6268357	6268671	2	minus	AC	CT		8	52740207	52740327	2	plus	AG	GT		2	47094438	47094542	2	plus	AG	GT		3	41263083	41263184	6	plus	AG	GT
1	7453729	7454018	2	plus	AG	GT		9	2085543	2088629	2	minus	AC	CT		3	1663621	1663855	2	plus	AG	GT		5	157562114	157562229	6	minus	AC	CT
1	753994	754098	2	plus	AG	GT		9	2152921	2153039	2	plus	AG	GT		3	20579693	20579812	2	minus	AC	CT		7	145215919	145216122	6	plus	AG	GT
1	7735613	7735713	2	plus	AG	GT		9	2152995	2153115	2	plus	AG	GT		3	21271883	21272017	2	plus	AG	GT		8	140002162	140002265	6	plus	AG	GT
1	985942	986356	2	plus	AG	GT		9	5282758	5282851	2	minus	AC	CT		3	24070700	24070853	2	minus	AC	CT		9	62309067	62309401	6	plus	AG	GT
1	986407	986947	2	minus	AC	CT		9	56174558	56174666	2	plus	AG	GT		3	44019859	44022586	2	plus	AG	GT		10	16377658	16377916	5	plus	AG	GT
1	986351	987030	2	plus	AG	GT		9	57375229	57375327	2	minus	AC	CT		3	50516001	50516126	2	minus	AC	CT		10	36787234	36787419	5	plus	AG	GT
1	987590	987785	2	plus	AG	GT		9	58136099	58136274	2	plus	AG	GT		3	5450509	5450643	2	minus	AC	CT		10	76416646	76417746	5	plus	AG	GT
2	11576046	11576402	2	plus	AG	GT		GL002605.1	4349244	4349321	2	minus	AC	CT		3	5960971	5961096	2	minus	AC	CT		10	9228444	9228593	5	plus	AG	GT
2	11713541	11713780	2	minus	AC	CT										3	5960977	5961120	2	minus	AC	CT		1	203627266	203627368	5	minus	AC	CT
2	11713766	11714002	2	minus	AC	CT										3	5961013	5961222	2	minus	AC	CT		1	295349207	295349332	5	plus	AG	GT
2	11713916	11714134	2	minus	AC	CT										3	5961283	5961801	2	minus	AC	CT		2	54473485	54473622	5	plus	AG	GT
2	11713820	11714341	2	minus	AC	CT										4	39980824	39981051	2	plus	AG	GT		4	32278924	32279052	5	plus	AG	GT
2	11714135	11714389	2	minus	AC	CT										4	4443375	4443485	2	minus	AC	CT		5	181447876	181447984	5	minus	AC	CT
2	11713537	11715076	2	minus	AC	CT										4	582984	583089	2	minus	AC	CT		7	167863779	167863984	5	plus	AG	GT
2	12861383	12861568	2	minus	AC	CT										4	8478992	8479216	2	minus	AC	CT		7	167863779	167863992	5	plus	AG	GT
2	17609702	17610040	2	plus	AG	GT										5	10224172	10224304	2	plus	AG	GT		7	33248622	33248824	5	plus	AG	GT
2	17706630	17706872	2	plus	AG	GT										5	42858798	42858934	2	plus	AG	GT		7	59705027	59705592	5	minus	AC	CT
2	17826793	17827011	2	plus	AG	GT										5	43651915	43652030	2	minus	AC	CT		7	71345345	71345455	5	plus	AG	GT
2	18009933	18010495	2	plus	AG	GT										5	43834975	43835133	2	plus	AG	GT		8	120302546	120302668	5	minus	AC	CT
2	18821545	18821769	2	minus	AC	CT										5	4658310	4658423	2	plus	AG	GT		9	124034850	124035901	5	plus	AG	GT
2	19289878	19290345	2	minus	AC	CT										6	18374904	18375037	2	plus	AG	GT		10	142347824	142351280	4	plus	AG	GT
2	19686480	19686766	2	plus	AG	GT										6	25897994	25898150	2	minus	AC	CT		10	96775090	96775221	4	minus	AC	CT
2	7757180	7757323	2	minus	AC	CT										6	35840819	35841206	2	plus	AG	GT		1	280772358	280772474	4	plus	AG	GT
2	8692717	8693003	2	minus	AC	CT										6	35840988	35841350	2	plus	AG	GT		1	38132763	38132867	4	minus	AC	CT
2	9698655	9698894	2	minus	AC	CT										6	35841164	35841475	2	plus	AG	GT		1	7964341	7964517	4	plus	AG	GT
3	15664623	15664992	2	minus	AC	CT										6	4703831	4703968	2	minus	AC	CT		2	139700267	139700392	4	minus	AC	CT
3	16757809	16758135	2	minus	AC	CT										7	1016915	1017053	2	minus	AC	CT		2	175113618	175113719	4	minus	AC	CT
3	17137350	17137736	2	plus	AG	GT										7	24621072	24621180	2	minus	AC	CT		2	223396438	223396596	4	minus	AC	CT
3	20065801	20066045	2	minus	AC	CT										7	27244655	27246523	2	plus	AG	GT		3	12422622	12423245	4	plus	AG	GT
3	2244277	2244505	2	minus	AC	CT										7	27253971	27254164	2	minus	AC	CT		3	221719182	221719285	4	plus	AG	GT
3	23059447	23059560	2	minus	AC	CT										7	35235002	35235112	2	plus	AG	GT		3	8542607	8542735	4	minus	AC	CT
3	2587888	2588301	2	minus	AC	CT										8	40380408	40380620	2	plus	AG	GT		4	204238994	204239096	4	plus	AG	GT
3	3860621	3860825	2	minus	AC	CT										8	8836691	8836985	2	plus	AG	GT		4	214314557	214314661	4	plus	AG	GT
3	4023734	4024118	2	minus	AC	CT										9	12019479	12019589	2	plus	AG	GT		4	237245277	237245429	4	minus	AC	CT
3	490938	491147	2	plus	AG	GT										9	12116965	12117100	2	plus	AG	GT		5	130699377	130699565	4	plus	AG	GT
3	5468548	5468745	2	plus	AG	GT										9	12256175	12256307	2	plus	AG	GT		5	178133185	178133291	4	minus	AC	CT
3	8113948	8114182	2	plus	AG	GT										9	12678010	12678182	2	minus	AC	CT		5	85426311	85426480	4	minus	AC	CT
3	9672749	9672874	2	plus	AG	GT										9	14588558	14588717	2	minus	AC	CT		6	108931714	108936811	4	plus	AG	GT
3	9752852	9753037	2	minus	AC	CT										9	33617095	33617594	2	plus	AG	GT		6	146182728	146182970	4	plus	AG	GT
4	10043523	10043745	2	minus	AC	CT										9	4066777	4067185	2	minus	AC	CT		6	159576809	159576919	4	plus	AG	GT
4	11228404	11228638	2	plus	AG	GT										9	42229888	42230013	2	plus	AG	GT		6	2451338	2451458	4	minus	AC	CT
4	13190100	13191206	2	plus	AG	GT										9	4665366	4665455	2	minus	AC	CT		6	29353558	29355461	4	minus	AC	CT
4	13473897	13474205	2	minus	AC	CT										9	47985196	47985289	2	minus	AC	CT		6	83127166	83127286	4	minus	AC	CT
4	13593965	13594121	2	minus	AC	CT										9	48751048	48751272	2	plus	AG	GT		7	71173682	71173786	4	minus	AC	CT
4	13611848	13612046	2	plus	AG	GT										9	54060989	54066276	2	minus	AC	CT		8	172673317	172673480	4	plus	AG	GT
4	13750925	13751059	2	plus	AG	GT										9	6230909	6231168	2	plus	AG	GT		9	109326566	109332173	4	minus	AC	CT
4	13937857	13938290	2	minus	AC	CT										9	6762531	6762670	2	minus	AC	CT		9	11085939	11088749	4	minus	AC	CT
4	14088244	14088650	2	plus	AG	GT										9	6763556	6763684	2	minus	AC	CT		9	139008295	139008413	4	plus	AG	GT
4	14088250	14088744	2	minus	AC	CT																		9	139449326	139449435	4	minus	AC	CT
4	14088268	14088744	2	minus	AC	CT																		9	57435082	57435327	4	plus	AG	GT
4	14088277	14088744	2	minus	AC	CT																		10	148254934	148255041	3	plus	AG	GT
4	14088349	14088752	2	plus	AG	GT																		10	36787162	36787317	3	plus	AG	GT
4	14088651	14088752	2	plus	AG	GT																		10	36787330	36787449	3	plus	AG	GT
4	14088300	14088765	2	minus	AC	CT																		10	36787270	36787461	3	plus	AG	GT
4	14088619	14088778	2	minus	AC	CT																		10	36787348	36787461	3	plus	AG	GT
4	14088819	14089326	2	plus	AG	GT																		10	60031057	60031168	3	plus	AG	GT
4	14088900	14089344	2	plus	AG	GT																		10	79766622	79766732	3	plus	AG	GT
4	14088910	14089347	2	plus	AG	GT																		10	86431106	86431246	3	minus	AC	CT
4	15780342	15780782	2	minus	AC	CT																		10	87105641	87105899	3	minus	AC	CT
4	15853403	15853561	2	plus	AG	GT																		10	8853720	8853827	3	minus	AC	CT
4	16356618	16356765	2	minus	AC	CT																		10	90214854	90214985	3	minus	AC	CT
4	16797605	16797844	2	minus	AC	CT																		1	120201224	120201392	3	minus	AC	CT
4	17298460	17298587	2	minus	AC	CT																		1	14624817	14624921	3	plus	AG	GT
4	17298460	17298595	2	minus	AC	CT																		1	15169783	15169889	3	plus	AG	GT
4	17298460	17298610	2	minus	AC	CT																		1	193637977	193640048	3	plus	AG	GT
4	17298968	17299237	2	minus	AC	CT																		1	233781463	233781776	3	minus	AC	CT
4	7760105	7760332	2	minus	AC	CT																		1	267394797	267394966	3	plus	AG	GT
4	7760333	7760494	2	minus	AC	CT																		1	271179995	271180117	3	plus	AG	GT
4	7760225	7760782	2	minus	AC	CT																		1	273514284	273514411	3	minus	AC	CT
4	7760690	7760869	2	minus	AC	CT																		1	27979704	27980078	3	minus	AC	CT
5	1498784	1499002	2	minus	AC	CT																		1	288926064	288926216	3	minus	AC	CT
5	16085999	16086374	2	plus	AG	GT																		1	292210532	292210639	3	plus	AG	GT
5	1622845	1622958	2	minus	AC	CT																		1	35746357	35746476	3	plus	AG	GT
5	17622974	17623250	2	minus	AC	CT																		1	48549692	48549797	3	minus	AC	CT
5	17756714	17757395	2	minus	AC	CT																		2	107917381	107917491	3	plus	AG	GT
5	17757153	17757395	2	minus	AC	CT																		2	10881003	10881444	3	minus	AC	CT
5	18535760	18536189	2	minus	AC	CT																		2	190096093	190096194	3	plus	AG	GT
5	18536008	18536207	2	minus	AC	CT																		2	220705624	220705947	3	plus	AG	GT
5	20820245	20820475	2	plus	AG	GT																		2	232657167	232657274	3	plus	AG	GT
5	21981975	21983990	2	minus	AC	CT																		2	232657118	232657294	3	plus	AG	GT
5	22893197	22893375	2	minus	AC	CT																		2	70542383	70542500	3	minus	AC	CT
5	23485563	23485718	2	plus	AG	GT																		3	175753683	175753927	3	minus	AC	CT
5	23882433	23882729	2	minus	AC	CT																		3	180798711	180798848	3	minus	AC	CT
5	23882568	23882729	2	minus	AC	CT																		3	186293349	186293580	3	plus	AG	GT
5	23882643	23882792	2	minus	AC	CT																		3	187769564	187769683	3	plus	AG	GT
5	24935591	24935746	2	plus	AG	GT																		3	54177848	54177959	3	plus	AG	GT
5	25400525	25400707	2	minus	AC	CT																		3	7277760	7277984	3	plus	AG	GT
5	25433387	25435473	2	plus	AG	GT																		3	8542629	8542745	3	minus	AC	CT
5	25646506	25646705	2	plus	AG	GT																		3	8543349	8543468	3	plus	AG	GT
5	25716405	25716595	2	plus	AG	GT																		4	221614085	221614195	3	minus	AC	CT
5	2759998	2760210	2	minus	AC	CT																		4	225418977	225419080	3	plus	AG	GT
5	2960788	2961042	2	minus	AC	CT																		4	229167053	229167178	3	plus	AG	GT
5	3404241	3404453	2	minus	AC	CT																		5	130697017	130697139	3	plus	AG	GT
5	4863677	4863896	2	minus	AC	CT																		5	2812589	2812694	3	minus	AC	CT
5	506601	506764	2	plus	AG	GT																		5	38593405	38593506	3	plus	AG	GT
5	5582460	5585361	2	minus	AC	CT																		5	819316	819525	3	plus	AG	GT
5	6498933	6499286	2	plus	AG	GT																		5	82480756	82480878	3	minus	AC	CT
5	8064496	8065018	2	minus	AC	CT																		5	98681471	98681617	3	minus	AC	CT
5	8736290	8736497	2	minus	AC	CT																		6	146179775	146179980	3	minus	AC	CT
5	885736	885838	2	plus	AG	GT																		6	152401412	152401575	3	minus	AC	CT
																								6	156451863	156451985	3	minus	AC	CT
																								6	164174324	164174553	3	minus	AC	CT
																								6	30255476	30255595	3	plus	AG	GT
																								6	54373146	54373268	3	minus	AC	CT
																								6	83129886	83130013	3	plus	AG	GT
																								7	107954421	107954532	3	minus	AC	CT
																								7	108415300	108415419	3	plus	AG	GT
																								7	147094856	147095011	3	plus	AG	GT
																								7	152869863	152869997	3	minus	AC	CT
																								7	157608610	157608765	3	minus	AC	CT
																								7	34009578	34009682	3	minus	AC	CT
																								7	34889295	34889424	3	minus	AC	CT
																								7	46494289	46494390	3	plus	AG	GT
																								7	4800788	4800905	3	minus	AC	CT
																								7	54645974	54646230	3	plus	AG	GT
																								7	89459378	89459569	3	minus	AC	CT
																								8	10092284	10092617	3	minus	AC	CT
																								8	167003588	167003710	3	plus	AG	GT
																								8	98108469	98108574	3	minus	AC	CT
																								9	110680011	110680135	3	minus	AC	CT
																								9	138810029	138810209	3	minus	AC	CT
																								9	139449326	139449432	3	minus	AC	CT
																								9	15620155	15620268	3	plus	AG	GT
																								9	62310284	62310399	3	plus	AG	GT
																								9	62311212	62311337	3	minus	AC	CT
																								9	96449137	96451785	3	plus	AG	GT
																								10	10199284	10199394	2	minus	AC	CT
																								10	10199744	10199931	2	minus	AC	CT
																								10	10200541	10200655	2	minus	AC	CT
																								10	119843123	119843231	2	minus	AC	CT
																								10	121870952	121871101	2	plus	AG	GT
																								10	125944860	125946049	2	minus	AC	CT
																								10	126159521	126159638	2	minus	AC	CT
																								10	128323348	128323473	2	plus	AG	GT
																								10	13793881	13794002	2	minus	AC	CT
																								10	141367137	141367282	2	plus	AG	GT
																								10	142499110	142499225	2	minus	AC	CT
																								10	147395012	147395179	2	minus	AC	CT
																								10	147860876	147861010	2	plus	AG	GT
																								10	149033577	149033712	2	plus	AG	GT
																								10	20707982	20708178	2	minus	AC	CT
																								10	21735380	21735516	2	plus	AG	GT
																								10	22140162	22140277	2	minus	AC	CT
																								10	34240816	34240964	2	minus	AC	CT
																								10	35592709	35592817	2	plus	AG	GT
																								10	36787090	36787233	2	plus	AG	GT
																								10	36787108	36787281	2	plus	AG	GT
																								10	36787150	36787293	2	plus	AG	GT
																								10	36787150	36787329	2	plus	AG	GT
																								10	36787234	36787395	2	plus	AG	GT
																								10	36787270	36787395	2	plus	AG	GT
																								10	36787294	36787455	2	plus	AG	GT
																								10	36787234	36787461	2	plus	AG	GT
																								10	36787294	36787461	2	plus	AG	GT
																								10	36787306	36787461	2	plus	AG	GT
																								10	36787294	36787509	2	plus	AG	GT
																								10	5746404	5746506	2	minus	AC	CT
																								10	76419809	76420045	2	minus	AC	CT
																								10	83432329	83432602	2	plus	AG	GT
																								10	8610293	8611321	2	minus	AC	CT
																								10	90214515	90214625	2	minus	AC	CT
																								1	105238357	105238599	2	plus	AG	GT
																								1	10543257	10543383	2	plus	AG	GT
																								1	110644989	110645152	2	plus	AG	GT
																								1	120200987	120201146	2	minus	AC	CT
																								1	120201122	120201230	2	minus	AC	CT
																								1	120201204	120201392	2	minus	AC	CT
																								1	129274325	129274526	2	minus	AC	CT
																								1	15069280	15069404	2	minus	AC	CT
																								1	151516499	151516674	2	minus	AC	CT
																								1	16825374	16825504	2	plus	AG	GT
																								1	170322303	170322423	2	minus	AC	CT
																								1	170981617	170981719	2	minus	AC	CT
																								1	177077598	177077704	2	minus	AC	CT
																								1	178035818	178036044	2	minus	AC	CT
																								1	178504194	178504338	2	minus	AC	CT
																								1	1785946	1786064	2	minus	AC	CT
																								1	180425984	180426121	2	minus	AC	CT
																								1	181907455	181907563	2	plus	AG	GT
																								1	181907451	181907570	2	plus	AG	GT
																								1	182129333	182129461	2	minus	AC	CT
																								1	182130216	182130329	2	minus	AC	CT
																								1	187417187	187417313	2	plus	AG	GT
																								1	191482585	191482792	2	plus	AG	GT
																								1	195364768	195364870	2	plus	AG	GT
																								1	195590741	195590872	2	minus	AC	CT
																								1	197691290	197691406	2	plus	AG	GT
																								1	221542847	221542949	2	minus	AC	CT
																								1	22251918	22252050	2	plus	AG	GT
																								1	225987211	225987422	2	minus	AC	CT
																								1	233392269	233392415	2	minus	AC	CT
																								1	240333077	240333202	2	plus	AG	GT
																								1	241039142	241039250	2	plus	AG	GT
																								1	241559719	241559850	2	plus	AG	GT
																								1	248180761	248180962	2	plus	AG	GT
																								1	24930772	24930875	2	plus	AG	GT
																								1	251447231	251447375	2	plus	AG	GT
																								1	256629450	256629594	2	minus	AC	CT
																								1	269571537	269571824	2	minus	AC	CT
																								1	27122921	27123043	2	plus	AG	GT
																								1	275290888	275291000	2	minus	AC	CT
																								1	281175313	281175430	2	minus	AC	CT
																								1	290879041	290879142	2	minus	AC	CT
																								1	290879143	290879292	2	minus	AC	CT
																								1	33837973	33838088	2	plus	AG	GT
																								1	3444696	3444824	2	plus	AG	GT
																								1	38133963	38134064	2	minus	AC	CT
																								1	38853767	38853923	2	minus	AC	CT
																								1	38854165	38854272	2	minus	AC	CT
																								1	55391105	55391234	2	plus	AG	GT
																								1	57298562	57298716	2	minus	AC	CT
																								1	7308476	7308580	2	minus	AC	CT
																								1	79851412	79851546	2	minus	AC	CT
																								1	91884932	91885071	2	minus	AC	CT
																								2	143429504	143429629	2	plus	AG	GT
																								2	154576744	154576848	2	plus	AG	GT
																								2	166064392	166065442	2	minus	AC	CT
																								2	166251448	166251586	2	minus	AC	CT
																								2	170192759	170192913	2	plus	AG	GT
																								2	186764897	186765003	2	plus	AG	GT
																								2	188701718	188701828	2	minus	AC	CT
																								2	193518187	193518312	2	minus	AC	CT
																								2	197181672	197181779	2	plus	AG	GT
																								2	210305664	210305775	2	plus	AG	GT
																								2	212437927	212438030	2	plus	AG	GT
																								2	225576017	225576153	2	minus	AC	CT
																								2	232657163	232657294	2	plus	AG	GT
																								2	233263736	233263862	2	minus	AC	CT
																								2	23618964	23619095	2	minus	AC	CT
																								2	237621156	237621269	2	minus	AC	CT
																								2	24500469	24500595	2	plus	AG	GT
																								2	34353280	34353381	2	minus	AC	CT
																								2	38920900	38921329	2	plus	AG	GT
																								2	41932110	41932245	2	plus	AG	GT
																								2	42886896	42887006	2	minus	AC	CT
																								2	42886896	42887030	2	minus	AC	CT
																								2	44891636	44891753	2	minus	AC	CT
																								2	51733188	51733322	2	minus	AC	CT
																								2	54473485	54473673	2	plus	AG	GT
																								2	725836	725938	2	minus	AC	CT
																								2	8924301	8924411	2	minus	AC	CT
																								3	120012280	120012402	2	plus	AG	GT
																								3	122127556	122127657	2	plus	AG	GT
																								3	150208185	150208287	2	plus	AG	GT
																								3	161772176	161772292	2	minus	AC	CT
																								3	166493251	166493369	2	plus	AG	GT
																								3	169622507	169622830	2	minus	AC	CT
																								3	169660935	169661048	2	minus	AC	CT
																								3	177544990	177545220	2	plus	AG	GT
																								3	178188179	178188331	2	plus	AG	GT
																								3	178864613	178864717	2	minus	AC	CT
																								3	178865459	178865683	2	minus	AC	CT
																								3	179690531	179693413	2	minus	AC	CT
																								3	187088049	187088149	2	minus	AC	CT
																								3	188359631	188359732	2	minus	AC	CT
																								3	192097020	192097215	2	plus	AG	GT
																								3	192845875	192846000	2	plus	AG	GT
																								3	194117305	194117445	2	minus	AC	CT
																								3	204534498	204534901	2	plus	AG	GT
																								3	20754190	20754291	2	plus	AG	GT
																								3	213708156	213708287	2	plus	AG	GT
																								3	217647122	217647223	2	plus	AG	GT
																								3	218112689	218112799	2	minus	AC	CT
																								3	218918194	218918295	2	plus	AG	GT
																								3	224095636	224095770	2	minus	AC	CT
																								3	230695386	230695551	2	plus	AG	GT
																								3	32125841	32126017	2	plus	AG	GT
																								3	35027928	35028263	2	plus	AG	GT
																								3	7279298	7279725	2	plus	AG	GT
																								3	7280526	7280848	2	plus	AG	GT
																								3	8542602	8542712	2	plus	AG	GT
																								3	8542607	8542726	2	minus	AC	CT
																								3	85675994	85676134	2	minus	AC	CT
																								4	13964951	13965056	2	minus	AC	CT
																								4	15320821	15320958	2	plus	AG	GT
																								4	159937854	159937984	2	minus	AC	CT
																								4	169513335	169513701	2	minus	AC	CT
																								4	174931370	174931481	2	minus	AC	CT
																								4	181461116	181461232	2	minus	AC	CT
																								4	183872262	183873789	2	minus	AC	CT
																								4	187531562	187531854	2	minus	AC	CT
																								4	195395338	195395451	2	minus	AC	CT
																								4	198548687	198548788	2	minus	AC	CT
																								4	204450737	204450879	2	minus	AC	CT
																								4	22549159	22549263	2	minus	AC	CT
																								4	237403384	237403494	2	minus	AC	CT
																								4	237403517	237403639	2	plus	AG	GT
																								4	237452962	237453153	2	minus	AC	CT
																								4	237585482	237585584	2	minus	AC	CT
																								4	238065438	238065552	2	minus	AC	CT
																								4	26527407	26527508	2	minus	AC	CT
																								4	2841079	2841210	2	minus	AC	CT
																								4	32280687	32280807	2	plus	AG	GT
																								4	33150329	33150439	2	minus	AC	CT
																								4	35251121	35251273	2	minus	AC	CT
																								4	3897307	3897411	2	minus	AC	CT
																								4	68272155	68272270	2	plus	AG	GT
																								4	80668805	80668998	2	plus	AG	GT
																								4	83199841	83200122	2	plus	AG	GT
																								4	83200631	83200778	2	plus	AG	GT
																								5	112448839	112448984	2	plus	AG	GT
																								5	11616049	11616172	2	plus	AG	GT
																								5	124591891	124592008	2	plus	AG	GT
																								5	137973426	137973541	2	plus	AG	GT
																								5	158905108	158905212	2	minus	AC	CT
																								5	158905350	158905571	2	plus	AG	GT
																								5	161706120	161706247	2	minus	AC	CT
																								5	166437632	166437799	2	minus	AC	CT
																								5	172436966	172437067	2	minus	AC	CT
																								5	178133188	178133291	2	minus	AC	CT
																								5	178133317	178133523	2	plus	AG	GT
																								5	179982391	179982492	2	plus	AG	GT
																								5	180683913	180684044	2	plus	AG	GT
																								5	186728093	186728239	2	minus	AC	CT
																								5	206940596	206940715	2	plus	AG	GT
																								5	206942503	206942643	2	plus	AG	GT
																								5	213329224	213329349	2	minus	AC	CT
																								5	213330007	213330120	2	plus	AG	GT
																								5	2522467	2522577	2	plus	AG	GT
																								5	2812531	2812676	2	minus	AC	CT
																								5	2812589	2812712	2	minus	AC	CT
																								5	32113038	32113178	2	minus	AC	CT
																								5	37731062	37731208	2	plus	AG	GT
																								5	42894175	42894319	2	minus	AC	CT
																								5	54201603	54201727	2	plus	AG	GT
																								5	5434668	5434814	2	minus	AC	CT
																								5	59457469	59457640	2	plus	AG	GT
																								5	65240896	65241278	2	minus	AC	CT
																								5	65449953	65450065	2	plus	AG	GT
																								5	65969118	65969427	2	plus	AG	GT
																								5	78859040	78859144	2	plus	AG	GT
																								5	84858480	84858766	2	minus	AC	CT
																								5	84878046	84878416	2	plus	AG	GT
																								5	89486541	89486645	2	minus	AC	CT
																								6	107907611	107907711	2	minus	AC	CT
																								6	124720894	124722007	2	plus	AG	GT
																								6	130064791	130064910	2	plus	AG	GT
																								6	146180135	146180272	2	minus	AC	CT
																								6	146180217	146180461	2	plus	AG	GT
																								6	146181846	146181993	2	minus	AC	CT
																								6	146182656	146182941	2	minus	AC	CT
																								6	14771036	14771165	2	plus	AG	GT
																								6	14771067	14771192	2	minus	AC	CT
																								6	147922466	147922608	2	plus	AG	GT
																								6	148116445	148116550	2	plus	AG	GT
																								6	148166685	148166794	2	minus	AC	CT
																								6	164174228	164174504	2	plus	AG	GT
																								6	165101761	165101871	2	plus	AG	GT
																								6	2450518	2450635	2	minus	AC	CT
																								6	3575211	3575324	2	plus	AG	GT
																								6	366581	366718	2	minus	AC	CT
																								6	40030542	40030655	2	minus	AC	CT
																								6	54372975	54373104	2	plus	AG	GT
																								6	64110227	64110368	2	minus	AC	CT
																								6	81892347	81892452	2	plus	AG	GT
																								7	13587191	13587346	2	minus	AC	CT
																								7	136212677	136212798	2	plus	AG	GT
																								7	137861298	137861411	2	plus	AG	GT
																								7	138413485	138413592	2	minus	AC	CT
																								7	147094187	147094304	2	minus	AC	CT
																								7	147094337	147094492	2	minus	AC	CT
																								7	147094865	147095011	2	plus	AG	GT
																								7	153331320	153331433	2	plus	AG	GT
																								7	157315216	157315450	2	minus	AC	CT
																								7	157608625	157608735	2	minus	AC	CT
																								7	157639593	157639754	2	plus	AG	GT
																								7	158973159	158973299	2	minus	AC	CT
																								7	164989261	164989401	2	plus	AG	GT
																								7	164994641	164995357	2	plus	AG	GT
																								7	167265705	167265825	2	plus	AG	GT
																								7	168634189	168634293	2	minus	AC	CT
																								7	171006777	171007149	2	plus	AG	GT
																								7	171673469	171673792	2	plus	AG	GT
																								7	176193063	176193163	2	plus	AG	GT
																								7	35555391	35555525	2	minus	AC	CT
																								7	41068796	41068906	2	minus	AC	CT
																								7	46494373	46494498	2	plus	AG	GT
																								7	5134333	5134478	2	plus	AG	GT
																								7	59657766	59660199	2	plus	AG	GT
																								8	107479179	107479286	2	plus	AG	GT
																								8	126125935	126126042	2	plus	AG	GT
																								8	126229667	126229798	2	plus	AG	GT
																								8	133997032	133997206	2	plus	AG	GT
																								8	137678263	137678364	2	plus	AG	GT
																								8	137678290	137678409	2	plus	AG	GT
																								8	150405171	150405282	2	minus	AC	CT
																								8	152263409	152263617	2	plus	AG	GT
																								8	154567327	154567427	2	minus	AC	CT
																								8	156915270	156915410	2	plus	AG	GT
																								8	161470778	161470919	2	plus	AG	GT
																								8	162552012	162552125	2	minus	AC	CT
																								8	167016071	167016199	2	plus	AG	GT
																								8	16920173	16920346	2	minus	AC	CT
																								8	16996759	16996900	2	plus	AG	GT
																								8	170198513	170198684	2	plus	AG	GT
																								8	170318207	170318428	2	plus	AG	GT
																								8	18784194	18784355	2	plus	AG	GT
																								8	26351261	26351378	2	minus	AC	CT
																								8	26768025	26768135	2	plus	AG	GT
																								8	58056079	58056210	2	plus	AG	GT
																								8	65487806	65487958	2	plus	AG	GT
																								8	67809953	67810109	2	plus	AG	GT
																								8	70313249	70313355	2	minus	AC	CT
																								8	70313993	70314149	2	plus	AG	GT
																								8	74457313	74457504	2	minus	AC	CT
																								8	7751217	7751382	2	plus	AG	GT
																								8	88397324	88397581	2	minus	AC	CT
																								8	90476014	90476160	2	minus	AC	CT
																								8	90476604	90476715	2	minus	AC	CT
																								9	108448009	108448112	2	minus	AC	CT
																								9	108448190	108448306	2	plus	AG	GT
																								9	109338763	109338911	2	minus	AC	CT
																								9	11718977	11719151	2	minus	AC	CT
																								9	122480164	122480268	2	minus	AC	CT
																								9	139449330	139449432	2	minus	AC	CT
																								9	149544103	149544218	2	minus	AC	CT
																								9	18904801	18904903	2	plus	AG	GT
																								9	19045328	19045438	2	plus	AG	GT
																								9	23540425	23540529	2	plus	AG	GT
																								9	25938791	25939221	2	plus	AG	GT
																								9	28618018	28618128	2	minus	AC	CT
																								9	62308138	62308255	2	minus	AC	CT
																								9	62309591	62309691	2	plus	AG	GT
																								9	62310026	62310223	2	minus	AC	CT
																								9	62310290	62310427	2	plus	AG	GT
																								9	62310314	62310427	2	plus	AG	GT
																								9	62310290	62310454	2	plus	AG	GT
																								9	91371544	91371647	2	minus	AC	CT
																								9	96457154	96457341	2	plus	AG	GT
																								scaffold_26	1603	1837	2	plus	AG	GT
																								scaffold_44	2160	2291	2	plus	AG	GT
