# Supplementary material for: Transcriptome-wide investigation of circular RNAs in rice
Source: RNA. 2015 Dec;21(12):2076–87. doi: 10.1261/rna.052282.115 (PMC4647462; doi:10.1261/rna.052282.115)
Supplement: Supplemental Material [file supp_052282.115_TableS6.xlsx]

## Sheet: panicle
gene	non-transgenic lines	transgenic lines	log2(fold_change)	test_stat	p_value	q_value
Os01t0104500-01	3.96465	0.00923796	-8.74541	5.98884	2.11342e-09	3.73958e-07	No apical meristem (NAM) protein domain containing protein.
Os06t0156700-01	26.3569	0.00964348	-11.4163	7.96062	1.77636e-15	1.06015e-12	Lipase, GDSL domain containing protein.
Os02t0202400-01	92.5532	0.0405496	-11.1564	12.9	0	0	Similar to Plastidial ADP-glucose transporter.
Os02t0249800-01	35.2829	0.0163709	-11.0736	10.6899	0	0	Glutelin precursor.
Os04t0348600-01	16.6269	0.0128559	-10.3369	7.17442	7.26086e-13	2.66322e-10	Hypothetical conserved gene.
Os03t0427300-01	9.67395	0.00815624	-10.212	7.08165	1.42442e-12	4.91359e-10	Glutelin type-A III precursor.
Os12t0628600-01	146.072	0.156615	-9.86524	11.9325	0	0	Similar to Thaumatin-like pathogenesis-related protein 3 precursor.
Os08t0374600-00	9.75069	0.017372	-9.13259	6.28018	3.38183e-10	7.30558e-08	Similar to Receptor kinase-like protein.
Os08t0127900-01	3.99336	0.00741023	-9.07387	6.23439	4.53537e-10	9.4965e-08	Similar to Globulin 1 (Fragment).
Os01t0156000-01	50.0786	0.0986292	-8.98796	11.0242	0	0	Similar to Myb family DNA-binding protein.
Os04t0173800-01	16.5387	0.04077	-8.66413	9.08981	0	0	Lectin precursor (Agglutinin).
Os04t0301500-01	17.9897	0.0445108	-8.6588	9.57148	0	0	Helix-loop-helix DNA-binding domain containing protein.
Os11t0641500-01	2.42272	0.00630928	-8.58494	5.8681	4.40822e-09	7.12028e-07	Cupredoxin domain containing protein.
Os04t0419100-01	5.33553	0.0158973	-8.3907	5.72469	1.03624e-08	1.52033e-06	Conserved hypothetical protein.
Os01t0963600-01	5.46293	0.0163759	-8.38196	5.71824	1.07631e-08	1.57257e-06	ABA/WDS induced protein family protein.
Os12t0427600-01	15.7327	0.0475586	-8.36985	10.2229	0	0	Similar to Subtilase family protein, expressed.
Os10t0569400-01	46.8586	0.151665	-8.27128	9.44544	0	0	RIR1a protein precursor.
Os02t0268100-01	2.29374	0.00809842	-8.14585	5.54015	3.02213e-08	3.85563e-06	Similar to Glutelin (Fragment).
Os02t0249000-01	2.33257	0.00903341	-8.01243	5.44082	5.30346e-08	6.20417e-06	Glutelin., Seed strage protein.
Os02t0214500-01	13.2856	0.0533447	-7.9603	8.7074	0	0	No apical meristem (NAM) protein domain containing protein.
Os09t0520400-01	1.68637	0.00709277	-7.89336	5.35172	8.71227e-08	9.44103e-06	Hypothetical conserved gene.
Os01t0356800-00	0.321078	0.00147785	-7.76329	7.22478	5.01821e-13	1.97811e-10	Hypothetical conserved gene.
Os09t0427551-01	0.895506	0.00416522	-7.74817	3.92077	8.82655e-05	0.00327503	Hypothetical gene.
Os12t0151000-01	1.95946	0.00911996	-7.74721	5.24342	1.57626e-07	1.57233e-05	Similar to Purple acid phosphatase.
Os02t0576400-01	16.8527	0.0803652	-7.71219	8.40046	0	0	Conserved hypothetical protein.
Os05t0202800-00	384.274	2.00734	-7.5807	11.6925	0	0	Similar to Metallothionein-like protein 3B.
Os03t0821350-01	3.6826	0.019508	-7.56051	3.82129	0.000132753	0.00463741	Hypothetical protein.
Os09t0482640-01	2.05034	0.0121674	-7.3967	7.57626	3.55271e-14	1.78712e-11	Serine/threonine protein kinase-related domain containing protein.
Os03t0289800-02	9.34346	0.0562531	-7.37588	8.47579	0	0	Similar to Leucoanthocyanidin dioxygenase-like protein.
Os05t0211100-01	1.32328	0.00837142	-7.30443	3.65787	0.000254321	0.00792492	Similar to Cytochrome P450-like protein.
Os09t0296500-01	10.8446	0.0702051	-7.27118	8.15107	4.44089e-16	3.00717e-13	Conserved hypothetical protein.
Os01t0527900-00	0.530002	0.00373174	-7.15	3.47306	0.000514564	0.0137769	Hypothetical conserved gene.
Os03t0266600-00	1.99728	0.0143587	-7.11996	4.78029	1.7504e-06	0.000120147	null
Os04t0380800-01	4.51677	0.0336688	-7.06773	6.48898	8.64191e-11	2.02866e-08	Hypothetical conserved gene.
Os09t0272250-00	13.1187	0.0981444	-7.0625	7.58781	3.26406e-14	1.66571e-11	Hypothetical conserved gene.
Os01t0186600-01	2.20949	0.016785	-7.0404	4.72221	2.33291e-06	0.000154168	Conserved hypothetical protein.
Os11t0690332-00	5.19578	0.0404949	-7.00346	8.0311	8.88178e-16	5.68628e-13	Serine/threonine protein kinase domain containing protein.
Os03t0336150-00	1.63566	0.0135578	-6.91461	3.42099	0.000623946	0.015876	Hypothetical gene.
Os12t0516200-00	483.719	4.02326	-6.90966	10.4638	0	0	Hypothetical protein.
Os07t0162700-01	1.21444	0.010286	-6.88346	4.60566	4.11168e-06	0.000254001	Alpha/beta hydrolase fold-3 domain containing protein.
Os02t0453600-01	6.13255	0.0527267	-6.86181	8.02912	8.88178e-16	5.68628e-13	Similar to Glutelin.
Os02t0570400-01	5.18101	0.0447726	-6.85447	8.53407	0	0	Similar to Ent-kaurene synthase 1A.
Os07t0677200-01	39.9064	0.345754	-6.85073	7.89281	2.88658e-15	1.69404e-12	Peroxidase.
Os02t0792500-00	5.98849	0.0524517	-6.83506	6.24684	4.18849e-10	8.88463e-08
Os05t0545300-01	4.42494	0.0403094	-6.7784	7.22379	5.05596e-13	1.97811e-10	Serine/threonine protein kinase domain containing protein.
Os10t0123100-00	1.10599	0.0100952	-6.77553	4.52654	5.9957e-06	0.000346099	Similar to immediate-early fungal elicitor protein CMPG1.
Os09t0297300-00	3.41638	0.0317853	-6.74797	7.1845	6.74572e-13	2.50032e-10	Similar to sugar carrier protein C.
Os08t0168000-01	1.36336	0.0127128	-6.74474	4.50453	6.65202e-06	0.00037495	Terpenoid synthase domain containing protein.
Os10t0142600-00	2.80048	0.0269012	-6.70186	5.78482	7.25906e-09	1.11133e-06	Serine/threonine protein kinase domain containing protein.
Os10t0505500-01	3.58133	0.0349712	-6.67819	4.46008	8.19288e-06	0.000448659	Similar to Nonspecific lipid-transfer protein 2G (LTP2G) (Lipid transfer protein 2 isoform 1) (LTP2-1) (7 kDa lipid transfer protein 1).
Os01t0580400-01	1.59032	0.015536	-6.67755	6.07314	1.25429e-09	2.40033e-07	Histone-fold domain containing protein.
Os11t0168500-00	3.22264	0.0327774	-6.6194	7.30076	2.86215e-13	1.24422e-10	Hypothetical conserved gene.
Os07t0215500-01	5.77066	0.0590978	-6.60949	6.01096	1.84429e-09	3.38234e-07	Allergenic protein.
Os01t0865700-00	1.13541	0.0117819	-6.5905	4.3917	1.12465e-05	0.000585818	Zinc finger, RING/FYVE/PHD-type domain containing protein.
Os06t0115000-01	21.4846	0.230317	-6.54354	8.76933	0	0	Conserved hypothetical protein.
Os03t0197175-00	2.27271	0.0244724	-6.53711	3.94816	7.87541e-05	0.00297861	Hypothetical gene.
Os05t0574900-01	2.13824	0.023304	-6.5197	6.53758	6.25218e-11	1.53952e-08	GRAS transcription factor domain containing protein.
Os02t0644200-01	5.65686	0.0640659	-6.4643	5.86005	4.6274e-09	7.3431e-07	Protein of unknown function DUF125, transmembrane family protein.
Os09t0275400-01	71.0556	0.812291	-6.45081	10.4151	0	0	Cytochrome P450 family protein.
Os08t0140300-01	1.22126	0.0141767	-6.42871	5.81251	6.15423e-09	9.58862e-07	Tryptophan decarboxylase1., Senescence-induced serotonin biosynthesis., Aromatic L-amino acid decarboxylases (AADCs) family.
Os04t0422500-01	2.72134	0.0316779	-6.4247	4.27471	1.91385e-05	0.000928244	Conserved hypothetical protein.
Os04t0429300-01	1.73787	0.0205167	-6.40438	5.78852	7.1008e-09	1.09185e-06	Basic helix-loop-helix dimerisation region bHLH domain containing protein.
Os05t0499100-01	10.6103	0.128696	-6.36535	7.1914	6.41265e-13	2.40215e-10	26 kDa globulin (Alpha-globulin).
Os01t0596700-01	1.11667	0.0139346	-6.32438	5.70392	1.17085e-08	1.68751e-06	FBD domain containing protein.
Os07t0141200-00	0.630276	0.00788054	-6.32155	4.19542	2.72362e-05	0.00123588	Serine/threonine protein kinase domain containing protein.
Os01t0834300-00	1.69675	0.0214898	-6.30298	4.18451	2.85783e-05	0.00128191
Os12t0582700-01	7.48191	0.0950912	-6.29795	7.83704	4.66294e-15	2.60621e-12	Cytochrome P450 family protein.
Os07t0677200-02	35.2071	0.463603	-6.24683	5.06345	4.11743e-07	3.57983e-05	Similar to Peroxidase.
Os11t0626700-01	1.83307	0.0246895	-6.21422	6.76683	1.31632e-11	3.79922e-09	Hypothetical protein.
Os11t0678301-00	1.72917	0.0236228	-6.19375	4.10583	4.02868e-05	0.00170662	Hypothetical conserved gene.
Os04t0370900-01	2.902	0.0398624	-6.18588	7.2546	4.02789e-13	1.64919e-10	Similar to H0607F01.5 protein.
Os06t0579100-01	0.902668	0.0128384	-6.13566	5.50827	3.62374e-08	4.44596e-06	Hypothetical protein.
Os12t0550900-00	0.337212	0.00499587	-6.07677	4.018	5.86948e-05	0.0023222
Os12t0240900-00	0.869876	0.0129433	-6.07053	4.01496	5.9456e-05	0.00234179
Os11t0697600-00	12.2196	0.183076	-6.06061	4.16426	3.12369e-05	0.00138703	Hypothetical gene.
Os10t0463200-01	37.439	0.561185	-6.05992	9.04883	0	0	Esterase, SGNH hydrolase-type domain containing protein.
Os03t0180900-01	267.826	4.05893	-6.04405	11.0202	0	0	Tify domain containing protein.
Os12t0123800-01	0.541505	0.00829242	-6.02904	3.98423	6.76997e-05	0.00261673	No apical meristem (NAM) protein domain containing protein.
Os02t0710300-01	2.56774	0.0399919	-6.00465	6.26494	3.72962e-10	7.95924e-08	Similar to INDEHISCENT protein.
Os06t0173200-00	1.00398	0.0160537	-5.96668	3.94078	8.12164e-05	0.0030586
Os09t0344500-01	216.12	3.46315	-5.96361	11.0892	0	0	Similar to O-methyltransferase ZRP4 (EC 2.1.1.-) (OMT).
Os03t0197200-01	4.26646	0.0696062	-5.93768	5.53671	3.0821e-08	3.8968e-06	Similar to Sorbitol transporter.
Os07t0216700-01	1.46319	0.0241216	-5.92265	3.91056	9.20822e-05	0.00340109	Bifunctional trypsin/alpha-amylase inhibitor domain containing protein.
Os10t0570200-01	85.5215	1.4112	-5.92129	8.24223	2.22045e-16	1.56373e-13	Similar to RIR1b protein precursor.
Os04t0188500-01	8.04719	0.133362	-5.91507	6.16803	6.91449e-10	1.39927e-07	Hypothetical protein.
Os01t0727700-00	3.30519	0.0555961	-5.8936	3.89473	9.83083e-05	0.00360963	Hypothetical conserved gene.
Os01t0628900-01	2.22065	0.0381398	-5.86355	6.33067	2.44093e-10	5.34296e-08	Cytochrome P450 family protein.
Os01t0155800-01	10.6687	0.184854	-5.85085	6.67409	2.48779e-11	6.68702e-09	Conserved hypothetical protein.
Os02t0252400-01	6.15239	0.10688	-5.84709	7.19201	6.38378e-13	2.40215e-10	Rice prolamin box binding factor., Grain filling., Dof zinc finger transcriptional activator.
Os02t0676800-01	1.32646	0.0238556	-5.79712	5.69964	1.20062e-08	1.71855e-06	Similar to Dehydration responsive element binding protein 1E (DREB1E protein).
Os01t0932650-01	3.97277	0.0720606	-5.78479	5.39566	6.82724e-08	7.68053e-06	Conserved hypothetical protein.
Os06t0582600-01	24.0769	0.442699	-5.76518	8.32279	0	0	Similar to Cysteine proteinase.
Os08t0137250-01	2.07953	0.0382419	-5.76496	6.20579	5.44227e-10	1.12066e-07	Similar to Fertilization independent endosperm.
Os01t0300000-01	1.14044	0.0209768	-5.76466	3.79679	0.00014658	0.0050159	3'-5' exonuclease domain containing protein.
Os11t0659600-01	1.11676	0.0208919	-5.74023	5.10467	3.31369e-07	2.98419e-05	Pectinesterase, catalytic domain containing protein.
Os04t0127500-01	0.301982	0.00582657	-5.69567	3.74491	0.000180459	0.0059665	Serine/threonine protein kinase-related domain containing protein.
Os09t0472700-00	25.1169	0.497189	-5.65872	7.26151	3.82805e-13	1.60468e-10	Similar to blight-associated protein p12.
Os07t0283300-00	0.894714	0.017861	-5.64655	3.71194	0.000205675	0.00663817
Os08t0136700-01	3.16351	0.0634229	-5.64038	6.02497	1.69141e-09	3.11821e-07	Protein of unknown function DUF26 domain containing protein.
Os12t0515800-01	11.3521	0.228517	-5.63452	6.06199	1.34445e-09	2.54521e-07	Hypothetical conserved gene.
Os07t0200801-00	2.0012	0.0423365	-5.56282	3.65624	0.000255944	0.0079511	Hypothetical conserved gene.
Os11t0490900-01	2.92002	0.0621125	-5.55495	5.91131	3.39405e-09	5.69102e-07	Similar to WRKY transcription factor 72.
Os06t0671300-01	0.525674	0.0114055	-5.52637	3.62536	0.000288558	0.00873664	Cytochrome P450 family protein.
Os11t0699532-00	20.5259	0.448317	-5.51679	5.73687	9.64432e-09	1.4209e-06	Hypothetical gene.
Os06t0640500-00	1.19689	0.0263096	-5.50755	5.37067	7.84427e-08	8.65332e-06	Cytochrome P450 family protein.
Os03t0153100-00	0.767904	0.0174213	-5.462	4.27056	1.94982e-05	0.00094309	Similar to FAD binding domain containing protein, expressed.
Os05t0278500-01	10.7339	0.246693	-5.44332	7.37551	1.63647e-13	7.58202e-11	Transferase family protein.
Os09t0358400-00	1.52659	0.0350923	-5.44301	3.00396	0.00266488	0.0491802	Similar to OsD305.
Os03t0307300-01	0.874744	0.0201369	-5.44095	4.80192	1.57154e-06	0.000109578	Nicotianamine synthase 1 (EC 2.5.1.43) (S-adenosyl-L-methionine:S- adenosyl-L-methionine:S-adenosyl-methionine 3-amino-3- carboxypropyltransferase 1) (OsNAS1).
Os01t0699600-01	11.1929	0.25826	-5.43762	7.24107	4.45199e-13	1.80188e-10	Serine/threonine protein kinase domain containing protein.
Os03t0570100-01	0.309476	0.00718647	-5.4284	3.55519	0.000377708	0.0108305	Similar to Cytochrome P450 79A1 (EC 1.14.13.41) (Tyrosine N-monooxygenase) (Cytochrome P450Tyr).
Os03t0734100-01	38.2408	0.890171	-5.42489	5.29838	1.16836e-07	1.22441e-05	Conserved hypothetical protein.
Os10t0340600-01	49.6215	1.15844	-5.42071	9.76613	0	0	Similar to Beta-galactosidase.
Os03t0437200-01	0.564419	0.0135578	-5.37958	3.52168	0.000428821	0.0119176	Zinc finger, C2H2-type domain containing protein.
Os03t0746900-01	4.30865	0.10471	-5.36277	5.8776	4.16249e-09	6.75436e-07	Protein of unknown function DUF1677, plant family protein.
Os11t0592000-01	69.904	1.7302	-5.33636	8.21904	2.22045e-16	1.56373e-13	Similar to Barwin.
Os01t0773800-00	1.37276	0.034275	-5.32378	4.68708	2.77127e-06	0.000178069	Hypothetical conserved gene.
Os03t0183500-01	13.3477	0.334134	-5.32002	6.85526	7.11808e-12	2.14224e-09	Protein of unknown function DUF581 family protein.
Os09t0447100-01	0.452363	0.0114397	-5.30536	3.46891	0.000522576	0.0139173	Conserved hypothetical protein.
Os06t0493100-01	39.2067	0.997676	-5.29639	7.04385	1.87006e-12	6.27129e-10	Conserved hypothetical protein.
Os06t0199700-00	2.22259	0.0569569	-5.28623	3.46208	0.000536027	0.0141383	Hypothetical conserved gene.
Os05t0559800-00	1.84315	0.0473964	-5.28125	3.45731	0.000545591	0.0143266	Conserved hypothetical protein.
Os12t0538600-00	6.25977	0.162443	-5.26811	3.4573	0.00054561	0.0143266	Thioredoxin fold domain containing protein.
Os01t0270700-00	1.68389	0.0439482	-5.25985	5.73996	9.47013e-09	1.40701e-06	Hypothetical conserved gene.
Os06t0144900-01	10.8321	0.283359	-5.25654	7.44654	9.59233e-14	4.62692e-11	Similar to Pectate lyase homolog (EC 4.2.2.2).
Os09t0271100-01	144.922	3.79167	-5.25629	9.58128	0	0	Hypothetical protein.
Os11t0701400-01	0.531202	0.0139043	-5.25566	3.43425	0.000594187	0.0152719	Chitinase (EC 3.2.1.14) III C10150-rice (EC 3.2.1.14).
Os09t0518000-00	1.96678	0.0516673	-5.25044	4.2993	1.71342e-05	0.000844998	Similar to indole-3-acetate beta-glucosyltransferase.
Os04t0366800-00	6.72752	0.17739	-5.24508	6.08923	1.13455e-09	2.18304e-07
Os10t0379100-01	0.310185	0.0082031	-5.24082	3.4229	0.000619565	0.0157973	Transferase family protein.
Os03t0235000-01	3.06702	0.0829497	-5.20846	5.5151	3.4859e-08	4.2918e-06	Similar to Peroxidase.
Os07t0655600-01	1.09821	0.0301579	-5.18647	4.54942	5.37935e-06	0.000317282	Pectin lyase fold/virulence factor domain containing protein.
Os05t0352500-00	1.36854	0.0376141	-5.18522	3.38822	0.000703467	0.0174809
Os02t0186200-00	0.301835	0.00836529	-5.1732	3.37536	0.000737185	0.0181143	Similar to Cytochrome P450 CYP71K14.
Os11t0224200-00	2.578	0.0719298	-5.16352	3.37721	0.000732259	0.018031
Os02t0517900-01	0.168505	0.00474676	-5.1497	3.35829	0.000784256	0.019045	Conserved hypothetical protein.
Os04t0528000-00	2.24638	0.0638869	-5.13594	4.5051	6.6343e-06	0.00037495	Similar to OSIGBa0115K01-H0319F09.15 protein.
Os01t0855400-00	1.09923	0.0313153	-5.13348	4.49701	6.8915e-06	0.000386407	Similar to Myb-like transcription factor.
Os01t0595600-01	9.5004	0.273047	-5.12077	6.644	3.05274e-11	8.08218e-09	Alpha/beta hydrolase fold-1 domain containing protein.
Os03t0198600-01	3.47476	0.100142	-5.11679	5.80978	6.25554e-09	9.70353e-07	Similar to HAHB-7 (Fragment).
Os03t0368300-01	0.390829	0.0113039	-5.11165	3.3326	0.000860391	0.0205397	Similar to Peroxidase 1.
Os07t0531400-02	2.75279	0.0798199	-5.108	5.3589	8.37297e-08	9.1847e-06	Similar to peroxidase 27.
Os11t0512000-01	4.26935	0.123991	-5.10571	6.13923	8.29232e-10	1.64966e-07	No apical meristem (NAM) protein domain containing protein.
Os11t0443700-01	7.22841	0.211894	-5.09226	6.36695	1.92824e-10	4.27027e-08	Similar to Short chain alcohol dehydrogenase-like.
Os11t0145200-01	5.15402	0.155471	-5.05098	6.4043	1.51059e-10	3.40967e-08	UDP-glucuronosyl/UDP-glucosyltransferase family protein.
Os03t0693900-00	1.52562	0.0460885	-5.04885	4.8605	1.17091e-06	8.57176e-05	Similar to Oxalate oxidase 1 (EC 1.2.3.4) (Germin).
Os01t0176800-01	0.112567	0.00341143	-5.04426	3.28418	0.00102281	0.0235239	Conserved hypothetical protein.
Os04t0128700-01	0.288877	0.00885829	-5.02728	3.27313	0.00106365	0.0243204	Thioredoxin-like fold domain containing protein.
Os06t0285200-01	1.10786	0.0341214	-5.02095	4.38619	1.15354e-05	0.000599093	Similar to Leafy cotyledon 1-like L1L protein.
Os08t0139700-01	0.594353	0.01836	-5.01668	4.82083	1.42961e-06	0.000101491	Similar to terpene synthase 6.
Os06t0652300-00	2.78488	0.0868069	-5.00366	5.41861	6.00647e-08	6.84466e-06	Similar to GDP-4-keto-6-deoxy-D-mannose-3, 5-epimerase-4-reductase (GER1); 21556- 22494.
Os05t0545400-01	1.30894	0.0410702	-4.99416	5.05376	4.33191e-07	3.72359e-05	Serine/threonine protein kinase domain containing protein.
Os07t0539900-01	5.01697	0.157994	-4.98888	6.59366	4.29119e-11	1.10293e-08	Similar to Beta-1,3-glucanase-like protein.
Os07t0127100-00	1.36864	0.0431315	-4.98785	3.25044	0.00115226	0.025909	Allergen V5/Tpx-1 related family protein.
Os07t0561800-01	1.45795	0.0466532	-4.96582	4.53015	5.8942e-06	0.000343052	Conserved hypothetical protein.
Os03t0277700-01	1.19412	0.0382662	-4.96373	4.69959	2.60684e-06	0.000169985	Protein of unknown function DUF26 domain containing protein.
Os08t0174300-00	2.14107	0.0687861	-4.96007	5.59984	2.14545e-08	2.85077e-06	Similar to transferase.
Os01t0613800-01	1.55934	0.05061	-4.94537	5.18885	2.11601e-07	2.03576e-05	Peptidase C1A, papain family protein.
Os12t0231000-01	5.3852	0.174828	-4.945	6.71692	1.85605e-11	5.18692e-09	TGF-beta receptor, type I/II extracellular region family protein.
Os07t0585700-01	0.448259	0.0146911	-4.93132	3.20694	0.00134156	0.0290881	Seed dormancy 4., Pre-harvest sprouting resistance., Zinc finger protein.
Os05t0546400-01	0.522472	0.017215	-4.92362	3.20193	0.00136511	0.0295431	Conserved hypothetical protein.
Os07t0688200-01	1.47855	0.0490455	-4.91392	5.15038	2.59963e-07	2.41526e-05	Similar to Typical P-type R2R3 Myb protein (Fragment).
Os05t0491400-01	74.6204	2.49271	-4.90378	8.27289	2.22045e-16	1.56373e-13	Similar to LRR protein.
Os07t0124900-01	1.35218	0.0455502	-4.89169	4.26094	2.0357e-05	0.000975255	Allergen V5/Tpx-1 related family protein.
Os02t0205500-01	8.49567	0.286682	-4.8892	6.91119	4.80616e-12	1.48451e-09	Similar to Fatty acid elongase 1.
Os03t0142600-00	0.48743	0.0164941	-4.88517	3.17501	0.00149829	0.0317054	Myb transcription factor domain containing protein.
Os11t0492100-01	2.14104	0.0726118	-4.88197	5.49726	3.85747e-08	4.68377e-06	Hypothetical protein.
Os01t0972800-01	3.14782	0.108015	-4.86505	5.6556	1.553e-08	2.18737e-06	WRKY1 (WRKY transcription factor 17).
Os04t0208450-01	3.08454	0.10611	-4.86143	4.24056	2.22965e-05	0.00104681	Hypothetical gene.
Os05t0253200-01	0.825887	0.028724	-4.84562	5.42822	5.69194e-08	6.61468e-06	Protein kinase, core domain containing protein.
Os11t0676050-00	1.11001	0.0387595	-4.83988	3.14653	0.00165221	0.0340818
Os06t0494400-01	1.22564	0.0429029	-4.83632	5.20425	1.94787e-07	1.8947e-05	Multi antimicrobial extrusion protein MatE family protein.
Os09t0542600-01	0.578264	0.0203056	-4.83178	3.13837	0.0016989	0.0348486	Similar to RING-H2 finger protein ATL1I.
Os01t0117300-00	0.909012	0.0321074	-4.82332	4.19177	2.76788e-05	0.00125273	Similar to cDNA clone:J013025P07, full insert sequence.
Os01t0734000-01	0.737293	0.0262736	-4.81055	4.17833	2.93658e-05	0.00131222	Similar to WRKY DNA binding protein.
Os04t0122200-00	0.118241	0.00426315	-4.79366	3.10958	0.00187353	0.037462
Os09t0447300-01	0.20118	0.0073013	-4.78419	3.10343	0.00191289	0.0380976	Cytochrome P450 family protein.
Os11t0565300-00	0.204003	0.00740543	-4.78386	3.10322	0.00191424	0.0381031	Similar to Protein kinase domain containing protein.
Os11t0677101-00	0.551986	0.0200793	-4.78085	4.98604	6.16299e-07	4.97732e-05	NB-ARC domain containing protein.
Os10t0542900-01	34.7039	1.27148	-4.77052	7.49495	6.63913e-14	3.24691e-11	Similar to chitinase.
Os10t0491000-01	115.679	4.31054	-4.74612	8.43409	0	0	Plant Basic Secretory Protein family protein.
Os12t0255866-01	0.554631	0.0207105	-4.74309	3.07678	0.00209252	0.0406857	Conserved hypothetical protein.
Os01t0955100-01	12.3353	0.461737	-4.73958	5.91333	3.35258e-09	5.64837e-07	Similar to Avr9/Cf-9 rapidly elicited protein 57 (Fragment).
Os08t0130250-01	0.191165	0.00715944	-4.73882	3.07192	0.00212685	0.0412167	Non-protein coding transcript.
Os03t0120666-01	0.979975	0.0367086	-4.73855	4.51841	6.2307e-06	0.000357321	Hypothetical gene.
Os09t0546800-00	15.775	0.593383	-4.73253	5.42273	5.86946e-08	6.7321e-06	Similar to Auxin induced protein.
Os03t0661600-01	9.09945	0.343532	-4.72726	6.23425	4.53952e-10	9.4965e-08	Similar to Alpha-amylase/trypsin inhibitor (Antifungal protein).
Os12t0218300-01	1.47171	0.0557805	-4.72159	4.09636	4.19702e-05	0.00176777	Hypothetical protein.
Os10t0490900-00	0.771041	0.0293444	-4.71565	4.08636	4.38192e-05	0.0018325	Similar to NtPRp27.
Os01t0137800-01	0.826499	0.0317008	-4.70442	5.63629	1.73754e-08	2.40875e-06	Non-protein coding transcript.
Os08t0189100-01	485.831	18.6741	-4.70134	9.67012	0	0	Similar to Germin-like protein precursor.
Os12t0153200-01	5.53657	0.214734	-4.68837	5.62254	1.88169e-08	2.54919e-06	Conserved hypothetical protein.
Os11t0644000-00	0.943833	0.0366848	-4.68528	4.45164	8.52156e-06	0.000465211	Similar to Protein kinase domain containing protein, expressed.
Os09t0522000-01	2.27538	0.0888878	-4.67798	4.869	1.12167e-06	8.24556e-05	Dehydration-responsive element-binding protein 1B.
Os03t0400700-01	35.6192	1.41304	-4.65578	6.57577	4.84024e-11	1.20876e-08	Similar to retrotransposon protein.
Os11t0463100-00	4.83244	0.19185	-4.6547	4.85079	1.2297e-06	8.94636e-05
Os02t0185500-00	1.11498	0.0444985	-4.64712	4.82754	1.38232e-06	9.83319e-05	Similar to Cytochrome P450 CYP71K14.
Os10t0351414-00	0.343284	0.0138266	-4.63388	4.40158	1.07466e-05	0.00056395	Hypothetical conserved gene.
Os01t0127600-01	4.99224	0.201512	-4.63075	5.41585	6.0999e-08	6.9287e-06	Similar to Bowman-Birk type proteinase inhibitor D-II precursor (IV).
Os02t0678800-01	2.64655	0.107166	-4.6262	4.94832	7.4855e-07	5.84132e-05	Similar to Transcription activator.
Os12t0415601-00	2.70467	0.109619	-4.62489	3.46477	0.000530692	0.0140425	Hypothetical gene.
Os11t0695201-00	2.23705	0.0919755	-4.6042	4.3799	1.18731e-05	0.000613015	Leucine-rich repeat, N-terminal domain containing protein.
Os10t0456000-01	2.68286	0.110719	-4.5988	5.16587	2.3932e-07	2.23526e-05	Conserved hypothetical protein.
Os12t0130200-00	0.500448	0.0209453	-4.57852	4.56991	4.87928e-06	0.00029071	Similar to D-mannose binding lectin family protein, expressed.
Os10t0392400-01	78.6577	3.29272	-4.57824	7.95588	1.77636e-15	1.06015e-12	Tify domain containing protein.
Os04t0171701-00	8.53568	0.35784	-4.57612	4.59866	4.2521e-06	0.0002613
Os01t0637800-00	28.9376	1.21475	-4.57421	6.50406	7.81808e-11	1.86007e-08	Similar to MYB8 protein.
Os11t0265300-00	0.719029	0.030366	-4.56552	4.32995	1.4914e-05	0.000750218
Os11t0514500-01	9.47543	0.402138	-4.55843	5.97983	2.23371e-09	3.91311e-07	Sorghum bicolor leucine-rich repeat-containing extracellular glycoprotein precursor.
Os11t0492300-00	0.192485	0.00822251	-4.54903	3.92173	8.79141e-05	0.00326543
Os03t0195100-00	2.9654	0.127045	-4.54481	5.6199	1.91065e-08	2.5777e-06	Similar to AGD2 (ABERRANT GROWTH AND DEATH 2); transaminase.
Os09t0482800-01	35.6595	1.53137	-4.54139	6.62562	3.4579e-11	9.01923e-09	EF hand domain containing protein.
Os01t0393100-01	4.05571	0.174521	-4.53848	5.77492	7.69913e-09	1.1736e-06	Similar to CUC2.
Os01t0620300-00	5.776	0.249677	-4.53194	5.93617	2.91752e-09	5.00167e-07	UDP-glucuronosyl/UDP-glucosyltransferase family protein.
Os06t0591200-01	5.39491	0.235302	-4.51902	5.32914	9.86783e-08	1.05613e-05	Conserved hypothetical protein.
Os03t0782200-01	25.5586	1.11636	-4.51694	7.12846	1.01497e-12	3.5739e-10	Conserved hypothetical protein.
Os12t0555300-00	9.85569	0.431531	-4.51342	4.5307	5.8788e-06	0.000342722	Similar to Pathogenesis-related protein PR-10a.
Os09t0472900-01	75.4321	3.33376	-4.49996	7.49476	6.63913e-14	3.24691e-11	Similar to Blight-associated protein p12 precursor.
Os09t0267400-01	16.3742	0.730193	-4.487	6.41569	1.40188e-10	3.20136e-08	Harpin-induced 1 domain containing protein.
Os08t0508000-01	0.532592	0.0238224	-4.48264	4.23987	2.2365e-05	0.00104863	Cytochrome P450 family protein.
Os09t0535500-01	0.799378	0.035834	-4.47948	3.85909	0.000113809	0.00406435	Similar to RING-H2 finger protein ATL1R (RING-H2 finger protein ATL8).
Os03t0604566-01	1.47996	0.0664481	-4.47718	4.60771	4.07122e-06	0.000252387	Conserved hypothetical protein.
Os10t0492600-01	0.535411	0.0241619	-4.46984	2.99927	0.0027063	0.049762	Similar to Tonoplast membrane integral protein ZmTIP3-1.
Os07t0178800-01	46.5544	2.10126	-4.46959	7.16904	7.55174e-13	2.74136e-10	Similar to Low molecular mass early light-inducible protein HV90, chloroplast precursor (ELIP).
Os04t0659300-01	4.16737	0.188927	-4.46323	5.25053	1.51664e-07	1.52602e-05	Protein of unknown function DUF26 domain containing protein.
Os12t0258700-01	0.285275	0.0129696	-4.45915	3.83609	0.000125008	0.00441059	Cupredoxin domain containing protein.
Os09t0341500-01	0.93878	0.042702	-4.45841	4.60215	4.18156e-06	0.000257415	Conserved hypothetical protein.
Os02t0686800-01	10.3096	0.469511	-4.45668	5.99478	2.03766e-09	3.66073e-07	Protein of unknown function DUF581 family protein.
Os01t0615100-01	4.32134	0.196867	-4.45619	4.44874	8.63747e-06	0.000468983	Similar to Substilin /chymotrypsin-like inhibitor (Proteinase inhibitor).
Os05t0112800-01	9.30571	0.424451	-4.45445	5.88216	4.04946e-09	6.60137e-07	Protein of unknown function DUF26 domain containing protein.
Os02t0677300-02	3.43154	0.157166	-4.4485	5.32658	1.00078e-07	1.06786e-05	Similar to CRT/DRE binding factor 1.
Os02t0632800-01	3.30356	0.152233	-4.43967	6.15191	7.65538e-10	1.54035e-07	Serine/threonine protein kinase domain containing protein.
Os01t0713200-01	68.662	3.18566	-4.42985	7.98992	1.33227e-15	8.37711e-13	Similar to Beta-glucanase.
Os08t0559800-01	2.98461	0.140386	-4.41007	5.33577	9.5141e-08	1.02137e-05	Hypothetical conserved gene.
Os02t0764700-01	4.06142	0.191383	-4.40744	5.11296	3.17157e-07	2.89319e-05	Similar to Ethylene-responsive transcription factor 4 (Ethylene-responsive element binding factor 4) (Related to APETALA-2 protein 5) (EREBP-4) (AtERF4).
Os09t0322400-01	1.38955	0.0657053	-4.40246	4.15933	3.19189e-05	0.0014102	Hypothetical protein.
Os04t0546500-02	1.35638	0.0649568	-4.38413	4.08426	4.42166e-05	0.00184456	Oleosin.
Os03t0149300-01	28.0062	1.34273	-4.38251	7.27711	3.41061e-13	1.46456e-10	Protein of unknown function DUF6, transmembrane domain containing protein.
Os08t0502600-01	2.22015	0.106541	-4.38117	4.14157	3.44937e-05	0.0014995	EF hand domain containing protein.
Os07t0603700-01	2.94169	0.1419	-4.3737	5.53161	3.17304e-08	3.99032e-06	Similar to Cytochrome P-450.
Os03t0313100-01	1.50468	0.0729375	-4.36666	4.91136	9.04474e-07	6.82496e-05	Similar to ANT-like protein.
Os11t0284600-00	0.776468	0.0379119	-4.3562	4.48072	7.43914e-06	0.000412515	Hypothetical conserved gene.
Os06t0241100-01	1.7797	0.0872275	-4.35071	5.03136	4.8702e-07	4.08308e-05	Protein kinase, core domain containing protein.
Os01t0973100-01	2.70885	0.134081	-4.33651	5.13128	2.87783e-07	2.63891e-05	Hypothetical conserved gene.
Os11t0656000-00	13.4282	0.671346	-4.32207	4.4808	7.43645e-06	0.000412515	Similar to Glutaredoxin-C13.
Os10t0439800-00	0.861518	0.0432517	-4.31605	4.43389	9.2546e-06	0.000498277	Similar to H0813E03.1 protein.
Os07t0465400-00	2.14601	0.107974	-4.3129	5.04203	4.60618e-07	3.92718e-05
Os03t0820400-01	1.04602	0.0526936	-4.31114	3.70042	0.000215241	0.00689632	Similar to ZPT2-13.
Os02t0217400-01	0.299951	0.0151547	-4.30689	3.69096	0.000223413	0.00712082	Cytochrome P450 family protein.
Os02t0569900-01	2.25409	0.114025	-4.30513	5.1391	2.76052e-07	2.53795e-05	Cytochrome P450 family protein.
Os07t0691100-01	28.7515	1.4589	-4.30068	7.67019	1.70974e-14	8.9856e-12	Similar to Pectin methylesterase 6 (Fragment).
Os04t0367000-01	0.466254	0.0238179	-4.291	4.97885	6.3962e-07	5.1071e-05	Hypothetical conserved gene.
Os05t0317900-01	0.320352	0.0164214	-4.28601	4.2372	2.26328e-05	0.00105836	Similar to Resistance protein candidate (Fragment).
Os05t0402900-01	1.46021	0.0748724	-4.2856	4.72562	2.29418e-06	0.000152708	Similar to EDGP.
Os08t0438100-01	2.44316	0.125667	-4.28107	4.24303	2.20522e-05	0.00103672	Similar to ZF-HD homeobox protein.
Os04t0462400-01	3.30323	0.170317	-4.27758	5.4261	5.75982e-08	6.65019e-06	Similar to lysine/histidine transporter.
Os09t0379600-00	5.38105	0.279828	-4.26527	5.37022	7.86398e-08	8.65332e-06	Similar to Homeobox-leucine zipper protein HOX25.
Os06t0173800-00	1.36224	0.0711103	-4.25978	4.21344	2.5151e-05	0.00115318
Os02t0759400-01	5.88875	0.309039	-4.2521	5.85872	4.6646e-09	7.3431e-07	Zinc finger, RING/FYVE/PHD-type domain containing protein.
Os10t0566800-01	0.286723	0.0151447	-4.24278	3.63004	0.000283374	0.00862417	Haem peroxidase, plant/fungal/bacterial family protein.
Os01t0786601-01	0.52531	0.027849	-4.23747	3.91632	8.99109e-05	0.00332907	Hypothetical gene.
Os01t0186900-01	5.05521	0.268993	-4.23213	3.98649	6.70566e-05	0.00259757	Conserved hypothetical protein.
Os11t0244600-01	2.64609	0.14176	-4.22234	4.97542	6.51077e-07	5.18681e-05	Epsin-like, N-terminal domain containing protein.
Os02t0571900-01	2.6053	0.140056	-4.21738	4.29965	1.71068e-05	0.000844831	Cytochrome P450 family protein.
Os02t0632900-00	1.86309	0.10037	-4.2143	4.96264	6.95431e-07	5.50282e-05	Similar to WAK111 - OsWAK receptor-like protein kinase.
Os04t0420400-00	0.409652	0.0223051	-4.19895	4.14003	3.47265e-05	0.00150776	Similar to H0525E10.1 protein.
Os06t0531000-00	2.54276	0.138569	-4.19772	5.0389	4.6822e-07	3.97276e-05	Similar to predicted protein.
Os04t0631100-01	2.90209	0.158401	-4.19543	5.30538	1.12438e-07	1.18893e-05	Major facilitator superfamily protein.
Os07t0667100-00	1.55648	0.085086	-4.19322	4.75745	1.96057e-06	0.000133017	Glycoside hydrolase, family 14 protein.
Os01t0584900-01	1.24109	0.0682749	-4.18411	4.28139	1.85726e-05	0.000904532	WRKY transcription factor 28-like (WRKY5) (WRKY transcription factor 77).
Os02t0572000-01	1.80421	0.099289	-4.18359	3.41227	0.000644242	0.01625	Conserved hypothetical protein.
Os08t0114300-01	1.03235	0.0569724	-4.17953	4.62267	3.78836e-06	0.000237359	D-arabinono-1,4-lactone oxidase domain containing protein.
Os07t0564150-00	7.50624	0.41555	-4.17499	3.12539	0.00177571	0.0360174	Hypothetical gene.
Os12t0488700-00	0.327251	0.0181674	-4.17097	3.5625	0.000367345	0.0106024	Hypothetical conserved gene.
Os12t0563700-01	20.0627	1.12156	-4.16094	6.86314	6.73639e-12	2.04484e-09	Pectin lyase fold domain containing protein.
Os08t0482600-01	12.2559	0.692238	-4.14606	5.59136	2.25295e-08	2.9601e-06	Cupredoxin domain containing protein.
Os04t0654400-01	1.47997	0.0837532	-4.14328	4.08401	4.42648e-05	0.00184456	Eggshell protein family protein.
Os01t0297200-01	7.02655	0.398859	-4.13887	5.93569	2.92611e-09	5.00167e-07	ATPase, AAA-type, core domain containing protein.
Os07t0677300-01	43.8958	2.49345	-4.13787	7.27223	3.53495e-13	1.49967e-10	Peroxidase.
Os04t0339000-00	0.627182	0.0356543	-4.13674	4.07182	4.66477e-05	0.00192337	Cytochrome P450 family protein.
Os01t0246400-01	50.8381	2.89085	-4.13634	7.05351	1.7446e-12	5.90683e-10	Similar to Low molecular mass early light-inducible protein HV90, chloroplast precursor (ELIP).
Os04t0581000-01	0.724176	0.0412929	-4.13237	4.06753	4.75149e-05	0.00195	Similar to Flavanone 3-hydroxylase-like protein.
Os01t0959750-00	122.826	7.0167	-4.12968	6.87038	6.4031e-12	1.96057e-09	Conserved hypothetical protein.
Os01t0374000-01	65.2455	3.73951	-4.12496	7.13727	9.51905e-13	3.38571e-10	Similar to Glutathione S-transferase I (EC 2.5.1.18) (GST-I) (GST-29) (GST class- phi).
Os03t0694000-01	1.54339	0.0886023	-4.12262	4.33202	1.47749e-05	0.000744282	Similar to Oxalate oxidase 1 (EC 1.2.3.4) (Germin).
Os11t0570400-01	5.80472	0.334715	-4.11622	5.12797	2.92888e-07	2.67875e-05	Conserved hypothetical protein.
Os06t0299300-01	0.612732	0.0359387	-4.09164	3.82607	0.000130208	0.00455753	Short-chain dehydrogenase/reductase SDR domain containing protein.
Os01t0237300-00	3.97339	0.23325	-4.09042	3.50824	0.000451088	0.0124188
Os01t0823600-01	152.003	8.93204	-4.08897	5.28161	1.28056e-07	1.33802e-05	Conserved hypothetical protein.
Os01t0678100-01	3.18634	0.188035	-4.08283	5.70613	1.15572e-08	1.6747e-06	Conserved hypothetical protein.
Os01t0699400-01	2.79424	0.165921	-4.07389	4.91121	9.05162e-07	6.82496e-05	Serine/threonine protein kinase domain containing protein.
Os02t0833500-02	0.310313	0.0184952	-4.0685	3.58536	0.000336613	0.00986913	Hypothetical conserved gene.
Os01t0257300-01	7.19494	0.430605	-4.06255	5.0536	4.33565e-07	3.72359e-05	Conserved hypothetical protein.
Os06t0150300-01	9.36232	0.561091	-4.06056	5.45727	4.83506e-08	5.71316e-06	Conserved hypothetical protein.
Os02t0114800-00	0.571824	0.034797	-4.03854	3.44001	0.000581698	0.0150498	Similar to MYB1.
Os06t0649000-01	8.73894	0.532434	-4.03678	5.77172	7.84653e-09	1.19091e-06	Similar to WRKY transcription factor 28.
Os11t0182100-01	7.06136	0.430426	-4.03611	5.22459	1.74542e-07	1.72156e-05	Conserved hypothetical protein.
Os02t0615500-01	3.5877	0.219192	-4.03279	5.62421	1.86357e-08	2.54341e-06	Protein kinase, core domain containing protein.
Os07t0178700-01	77.8536	4.75718	-4.03259	7.36714	1.74305e-13	7.97095e-11	Similar to Low molecular mass early light-inducible protein HV90, chloroplast precursor (ELIP).
Os02t0571800-00	1.51919	0.0929753	-4.03031	4.9262	8.38437e-07	6.43204e-05	Terpene synthase-like domain containing protein.
Os11t0695000-01	3.68985	0.225842	-4.03018	5.25048	1.517e-07	1.52602e-05	Similar to Leucine Rich Repeat family protein.
Os01t0382200-01	0.324413	0.0199436	-4.02384	3.42423	0.000616542	0.0157545	Transferase family protein.
Os05t0127500-01	8.66824	0.533325	-4.02265	5.85386	4.80299e-09	7.51657e-07	Similar to Leucoanthocyanidin dioxygenase-like protein.
Os07t0429700-01	5.45974	0.337197	-4.01717	4.62814	3.68961e-06	0.000232413	Conserved hypothetical protein.
Os02t0504000-01	8.56698	0.52938	-4.01641	6.05116	1.43811e-09	2.70794e-07	Cytochrome P450 domain containing protein.
Os01t0699100-01	2.04787	0.126865	-4.01277	4.6907	2.72268e-06	0.00017591	Serine/threonine protein kinase domain containing protein.
Os03t0588800-01	1.39644	0.0865576	-4.01195	4.86217	1.16107e-06	8.51739e-05	Hypothetical conserved gene.
Os01t0597600-01	0.583013	0.0362483	-4.00754	3.92817	8.55961e-05	0.00319619	Amino acid transporter, transmembrane domain containing protein.
Os01t0859100-01	0.614848	0.038422	-4.00023	4.06512	4.8008e-05	0.00196794	Similar to WIP1 protein (Fragment).
Os02t0636600-00	0.887848	0.0555816	-3.99763	3.72983	0.000191612	0.0062415	GRAM domain containing protein.
Os04t0639000-01	5.37238	0.336346	-3.99754	4.51531	6.32233e-06	0.000360813	Conserved hypothetical protein.
Os01t0915200-01	4.45285	0.279367	-3.9945	4.67246	2.97615e-06	0.000189848	Similar to Cystatin.
Os12t0510750-00	4.87627	0.306585	-3.99142	4.50591	6.60892e-06	0.00037474	Conserved hypothetical protein.
Os02t0529500-01	59.2415	3.73558	-3.9872	7.3313	2.2804e-13	1.01642e-10	Similar to SNAP25-like protein C (Fragment).
Os10t0198900-00	0.770228	0.0488476	-3.97893	3.70952	0.000207653	0.00668363	Hypothetical conserved gene.
Os04t0489800-01	17.6382	1.11891	-3.97854	6.75003	1.47817e-11	4.23166e-09	Zinc finger, RING/FYVE/PHD-type domain containing protein.
Os12t0555000-01	215.071	13.7603	-3.96623	7.95415	1.77636e-15	1.06015e-12	Similar to Probenazole-inducible protein PBZ1.
Os07t0601100-01	3.12623	0.200662	-3.96159	4.90238	9.46814e-07	7.07839e-05	Similar to NADPH HC toxin reductase (Fragment).
Os04t0322100-01	2.7268	0.175139	-3.96064	4.61938	3.84887e-06	0.000240019	Protein of unknown function DUF26 domain containing protein.
Os08t0374000-01	84.1562	5.40866	-3.95973	5.8822	4.0486e-09	6.60137e-07	Bet v I allergen family protein.
Os06t0526200-00	3.03601	0.195799	-3.95473	3.3778	0.000730695	0.018005
Os12t0577700-00	9.82707	0.633815	-3.95463	5.93934	2.86173e-09	4.93957e-07	Similar to Protein kinase domain containing protein, expressed.
Os04t0483900-00	0.222685	0.0143639	-3.95448	3.35858	0.000783445	0.0190384
Os02t0767800-00	0.338895	0.0220407	-3.9426	3.34848	0.000812553	0.0195974	Similar to DNA binding protein.
Os06t0147250-00	3.31151	0.215766	-3.93995	3.36518	0.000764945	0.0186791	Hypothetical conserved gene.
Os11t0474800-01	2.91692	0.191176	-3.93147	4.92272	8.53517e-07	6.51931e-05	Similar to Isoform 2 of Stemar-13-ene synthase.
Os07t0154100-01	1.72249	0.114865	-3.90649	4.32055	1.55642e-05	0.000774075	Similar to Viviparous-14.
Os07t0663900-00	1.07248	0.0717805	-3.90122	3.81412	0.000136668	0.00474407	Similar to Oxidoreductase, short chain dehydrogenase/reductase family protein, expressed.
Os01t0795200-01	3.56422	0.23863	-3.90074	5.34575	9.00429e-08	9.696e-06	Similar to Subtilase.
Os04t0654500-01	0.889025	0.0595855	-3.89919	3.95055	7.79711e-05	0.00295535	Conserved hypothetical protein.
Os01t0276900-01	60.7533	4.08739	-3.89371	6.52526	6.78848e-11	1.64852e-08	Conserved hypothetical protein.
Os03t0375200-00	0.452585	0.0304914	-3.89171	3.79973	0.000144856	0.00496174	Hypothetical conserved gene.
Os02t0833000-01	0.491832	0.0332213	-3.88798	3.6131	0.000302558	0.00905154	Similar to Serine/threonine-protein kinase PBS1 (EC 2.7.1.37) (AvrPphB susceptible protein 1).
Os01t0364400-00	0.553152	0.0374056	-3.88635	3.79449	0.000147945	0.00504303	Similar to WAK111 - OsWAK receptor-like protein kinase.
Os07t0274300-00	0.985851	0.0667475	-3.88458	3.79533	0.000147448	0.00503094	Hypothetical conserved gene.
Os01t0561600-01	0.900745	0.061067	-3.88265	4.28929	1.79246e-05	0.000875395	Cytochrome P450 family protein.
Os04t0316200-01	6.64338	0.450779	-3.88143	5.17762	2.24731e-07	2.11019e-05	Protein of unknown function DUF26 domain containing protein.
Os06t0636100-00	3.70818	0.252365	-3.87713	4.79164	1.65426e-06	0.00011444	Hypothetical conserved gene.
Os04t0178400-01	6.71356	0.457065	-3.87661	5.61385	1.97873e-08	2.65935e-06	Similar to Cytochrome P450 CYP99A1 (EC 1.14.-.-) (Fragment).
Os05t0465400-01	6.2619	0.434364	-3.84963	5.06669	4.04792e-07	3.5281e-05	Protein of unknown function DUF1218 family protein.
Os12t0555200-01	117.183	8.13924	-3.84773	7.31947	2.48912e-13	1.09559e-10	Similar to Probenazole-inducible protein PBZ1.
Os01t0558100-01	0.455721	0.0317064	-3.84531	3.25907	0.0011178	0.0252844	Similar to Glutathione S-transferase TSI-1 (EC 2.5.1.18) (Glutathione S- transferase 1).
Os12t0265900-00	1.82582	0.127239	-3.84294	4.36244	1.28618e-05	0.000658269	Similar to Wall-associated kinase-like 1.
Os05t0161500-01	5.79678	0.404464	-3.84117	5.5959	2.19482e-08	2.90542e-06	RelA/SpoT domain containing protein.
Os08t0106300-00	0.365103	0.0255068	-3.83935	3.56185	0.000368244	0.0106051	Cytochrome P450 family protein.
Os08t0387050-01	0.124986	0.00874162	-3.83772	3.24911	0.00115768	0.025981	Hypothetical conserved gene.
Os01t0796000-01	2.582	0.180938	-3.83492	3.88653	0.000101687	0.00370662	Conserved hypothetical protein.
Os01t0179600-01	17.138	1.20732	-3.82731	5.04276	4.58873e-07	3.9218e-05	UDP-glucuronosyl/UDP-glucosyltransferase family protein.
Os03t0348200-00	1.81752	0.128121	-3.82639	4.56783	4.92803e-06	0.000293118	Hypothetical conserved gene.
Os01t0615050-00	2.02897	0.143298	-3.82365	3.87071	0.000108517	0.00389908	Proteinase inhibitor I13, potato inhibitor I family protein.
Os04t0344100-01	13.8951	0.981449	-3.82352	6.41489	1.40921e-10	3.20136e-08	Similar to OSIGBa0106G08.3 protein.
Os06t0681200-01	1.1599	0.0819299	-3.82346	3.97503	7.03693e-05	0.00270802	Cupredoxin domain containing protein.
Os01t0201500-00	0.501483	0.0355551	-3.81807	3.23424	0.00121967	0.0269938	Similar to early nodulin 20.
Os02t0198800-01	18.5561	1.32018	-3.81308	6.17414	6.65239e-10	1.35401e-07	Protein of unknown function DUF868, plant family protein.
Os03t0191800-00	1.13565	0.0809346	-3.81062	3.71542	0.000202866	0.00656554	Hypothetical conserved gene.
Os05t0500200-01	1.97749	0.141264	-3.80721	5.0192	5.18861e-07	4.3397e-05	Conserved hypothetical protein.
Os01t0705200-01	8.70556	0.623172	-3.80423	5.1822	2.19282e-07	2.08702e-05	Late embryogenesis abundant protein repeat containing protein.
Os08t0113000-01	6.28239	0.449909	-3.80361	5.24998	1.52116e-07	1.52602e-05	Similar to Peroxidase 47 precursor (EC 1.11.1.7) (Atperox P47) (ATP32).
Os03t0723400-01	7.10255	0.511318	-3.79605	4.96507	6.86754e-07	5.45111e-05	Conserved hypothetical protein.
Os03t0664800-01	0.522156	0.0376653	-3.79317	3.21139	0.00132094	0.0288006	Acyl-CoA N-acyltransferase domain containing protein.
Os01t0868000-00	4.35854	0.315104	-3.78995	4.83199	1.35178e-06	9.65492e-05	Hypothetical conserved gene.
Os08t0205800-01	5.67054	0.410026	-3.7897	4.79444	1.6313e-06	0.000113521	Hypothetical conserved gene.
Os01t0196300-01	3.69269	0.267514	-3.78698	5.03316	4.82451e-07	4.06016e-05	Helix-loop-helix DNA-binding domain containing protein.
Os05t0439000-01	0.843566	0.0611156	-3.78689	3.82218	0.000132279	0.00462542	Similar to RING-H2 finger protein ATL1O (RING-H2 finger protein ATL11).
Os07t0619400-01	1.65368	0.119849	-3.78639	3.82628	0.000130095	0.00455753	EF-Hand type domain containing protein.
Os07t0569800-01	0.185109	0.013419	-3.78603	3.20176	0.0013659	0.0295431	Concanavalin A-like lectin/glucanase domain containing protein.
Os06t0323100-01	10.0537	0.736233	-3.77142	5.5226	3.34017e-08	4.15209e-06	SAM dependent carboxyl methyltransferase family protein.
Os07t0497500-00	0.319925	0.0234429	-3.77051	3.18864	0.00142944	0.0306165	Similar to MYB transcription factor.
Os03t0365900-01	6.33385	0.465872	-3.76508	4.84834	1.24497e-06	9.02013e-05	Lipase, GDSL domain containing protein.
Os09t0268100-00	0.413835	0.0307317	-3.75126	3.77916	0.000157358	0.00529722	Similar to lectin-like receptor kinase 7.
Os05t0442200-00	1.55367	0.115497	-3.74976	3.47873	0.000503788	0.0135415	Similar to DNA binding protein.
Os08t0142500-01	1.73489	0.129348	-3.74552	3.78042	0.000156563	0.00527798	Pectinesterase inhibitor domain containing protein.
Os04t0653700-01	1.23163	0.0919755	-3.74318	3.4696	0.000521226	0.0138936	Conserved hypothetical protein.
Os09t0471200-00	0.161304	0.0120527	-3.74235	3.16118	0.00157133	0.0327465	Similar to WAK80 - OsWAK receptor-like protein kinase.
Os01t0915900-01	0.245563	0.0184759	-3.73238	3.15275	0.00161741	0.0335013	Conserved hypothetical protein.
Os01t0958200-01	2.12091	0.160113	-3.72752	4.53791	5.68154e-06	0.000332876	Curculin-like (mannose-binding) lectin domain containing protein.
Os01t0385000-01	1.42872	0.108263	-3.7221	3.54864	0.000387223	0.0110315	Conserved hypothetical protein.
Os03t0795600-01	1.71755	0.13021	-3.72144	4.09007	4.31245e-05	0.00180774	Uncharacterised protein family UPF0005 domain containing protein.
Os01t0746400-00	0.310486	0.0235442	-3.72109	3.43974	0.00058227	0.0150535	Similar to Carotenoid cleavage dioxygenase.
Os06t0569601-01	0.290155	0.0220311	-3.71921	3.72734	0.000193513	0.00628596	Hypothetical gene.
Os03t0840800-01	2.30596	0.175349	-3.71706	4.98218	6.28724e-07	5.03151e-05	Similar to Phospholipase D.
Os01t0137700-01	0.767726	0.0584745	-3.71471	4.13829	3.49898e-05	0.00151545	Conserved hypothetical protein.
Os08t0196900-01	0.410899	0.0313276	-3.71328	3.60461	0.000312618	0.00930508	Hypothetical conserved gene.
Os04t0405300-01	2.60252	0.199766	-3.70353	4.32393	1.53275e-05	0.000764465	Similar to Stem secoisolariciresinol dehydrogenase (Fragment).
Os07t0541700-01	0.486657	0.0373574	-3.70344	3.12831	0.00175816	0.0357851	Similar to Receptor-like protein kinase 5.
Os03t0650200-00	1.17273	0.0904289	-3.69694	4.1717	3.02332e-05	0.00134756	Cytochrome P450 family protein.
Os06t0198900-01	2.09746	0.161791	-3.69644	4.76423	1.89572e-06	0.000129114	Tyrosine protein kinase domain containing protein.
Os05t0510600-01	0.173842	0.0134427	-3.69288	3.11567	0.00183525	0.0369063	Similar to Tyrosine/dopa decarboxylase (EC 4.1.1.28).
Os04t0587100-01	3.2649	0.252864	-3.69061	4.05775	4.95472e-05	0.00201461	Pectinesterase inhibitor domain containing protein.
Os09t0471550-01	0.942193	0.0730531	-3.689	4.34024	1.42327e-05	0.000719029	Serine/threonine protein kinase domain containing protein.
Os09t0425200-00	5.9583	0.462338	-3.68788	4.58059	4.6367e-06	0.000281776	Similar to Glycine-rich protein.
Os03t0371300-00	31.5198	2.45268	-3.68383	5.53827	3.05482e-08	3.88326e-06	Similar to Cytochrome P450 CYP709E4.
Os09t0425300-00	1.0841	0.0845459	-3.68062	3.70325	0.000212858	0.00682618	Hypothetical conserved gene.
Os10t0193500-01	2.24114	0.175138	-3.67767	3.87174	0.00010806	0.00388664	Plant lipid transfer protein/seed storage/trypsin-alpha amylase inhibitor domain containing protein.
Os02t0181300-01	146.699	11.4732	-3.67651	6.68225	2.35303e-11	6.42286e-09	Similar to WRKY transcription factor.
Os07t0671000-00	21.9979	1.72613	-3.67176	4.39681	1.09853e-05	0.000573909	Similar to Shoot protein RAA2.
Os02t0306401-00	1.64756	0.129962	-3.66417	4.26885	1.96486e-05	0.000947761	Similar to Nicotianamine aminotransferase A.
Os06t0146800-01	19.0824	1.50801	-3.66153	5.08825	3.6138e-07	3.17329e-05	Conserved hypothetical protein.
Os01t0179650-00	18.265	1.44391	-3.66102	4.51898	6.21394e-06	0.000356941	Hypothetical gene.
Os10t0515900-01	0.267859	0.0211993	-3.65939	3.37625	0.000734816	0.0180687	Cytochrome P450 family protein.
Os10t0544200-01	3.67034	0.291085	-3.6564	4.75219	2.01221e-06	0.000135735	Basic helix-loop-helix dimerisation region bHLH domain containing protein.
Os02t0725900-01	0.472443	0.0374799	-3.65595	3.08451	0.00203885	0.0398844	Histone-fold domain containing protein.
Os05t0140300-00	0.476195	0.0377899	-3.65548	3.08412	0.00204157	0.0398933	Hypothetical conserved gene.
Os04t0283600-00	0.493437	0.039217	-3.65332	3.08229	0.00205413	0.0400719	Similar to OSIGBa0097I11.4 protein.
Os01t0864200-01	1.0472	0.0834473	-3.64953	3.53999	0.000400146	0.0113081	Conserved hypothetical protein.
Os03t0654700-01	6.71734	0.535802	-3.64812	5.2018	1.97373e-07	1.91457e-05	Protein of unknown function DUF1637 family protein.
Os03t0188100-01	0.528987	0.0423463	-3.64293	3.64008	0.000272555	0.00835733	Similar to transparent testa 12 protein.
Os07t0541500-01	1.74065	0.139475	-3.64155	4.58663	4.50461e-06	0.000274898	Similar to KI domain interacting kinase 1.
Os02t0605900-01	7.10776	0.569924	-3.64055	4.83552	1.32796e-06	9.52345e-05	Similar to Chitinase (EC 3.2.1.14) A.
Os04t0273900-00	2.12856	0.170829	-3.63925	4.10105	4.11275e-05	0.00173643	Similar to OSIGBa0138E08-OSIGBa0161L23.6 protein.
Os02t0270200-01	0.267071	0.021487	-3.63569	3.51955	0.000432282	0.0119942	Similar to Subtilase.
Os04t0332700-01	16.202	1.305	-3.63405	5.5561	2.75864e-08	3.54515e-06	Conserved hypothetical protein.
Os05t0503650-01	8.56609	0.690232	-3.63348	4.16187	3.15655e-05	0.00139809	Non-protein coding transcript.
Os02t0531600-01	0.275857	0.0222771	-3.63029	3.05909	0.0022201	0.0427181	PEBP family protein.
Os05t0375400-01	14.4013	1.16431	-3.62865	4.79375	1.63692e-06	0.000113687	Beta-glucanase precursor.
Os01t0336300-00	0.962206	0.0780133	-3.62455	3.74148	0.000182941	0.00603719	Hypothetical conserved gene.
Os03t0734500-01	3.44527	0.280439	-3.61886	3.96948	7.20285e-05	0.00276282	Conserved hypothetical protein.
Os11t0534300-01	0.337942	0.0275168	-3.61839	3.50137	0.000462868	0.01264	Zinc finger, DHHC-type domain containing protein.
Os02t0570700-01	43.8536	3.58154	-3.61404	7.0804	1.43729e-12	4.91359e-10	Cytochrome P450 family protein.
Os07t0482900-00	1.67622	0.1371	-3.61191	3.88898	0.000100665	0.00367699
Os12t0491800-01	0.983633	0.0804601	-3.61178	4.29543	1.74357e-05	0.000853886	Similar to Ent-kaurene synthase 1A.
Os12t0169600-01	37.3964	3.06022	-3.61119	6.73852	1.60014e-11	4.54389e-09	Similar to Fructose-bisphosphate aldolase.
Os12t0484600-01	6.43159	0.52716	-3.60886	3.53003	0.000415515	0.011649	Nodule-specific protein-like.
Os11t0539350-00	17.1468	1.40894	-3.60525	3.99895	6.36236e-05	0.00248372	Hypothetical gene.
Os05t0444200-01	0.458542	0.0380635	-3.59057	3.598	0.000320676	0.00947287	Similar to T6J4.5 protein (WIP6 protein).
Os07t0240200-01	5.11519	0.42543	-3.58779	4.98966	6.0485e-07	4.89608e-05	Similar to Beta-1,3 glucanase precursor (EC 3.2.1.39).
Os11t0644100-00	3.16852	0.264661	-3.58159	4.4131	1.01902e-05	0.000537737	Leucine-rich repeat, N-terminal domain containing protein.
Os03t0561400-01	0.21592	0.0181283	-3.57418	3.45283	0.000554744	0.0144694	Conserved hypothetical protein.
Os02t0745100-01	55.7425	4.68394	-3.57298	6.95118	3.62244e-12	1.14913e-09	Nodulin 26-like intrinsic membrane protein 2;1., Low silicon rice 1., Silicon influx transporter., Arsenic species (As) uptake., Arsenite efflux., Aquaporin NIP III subfamily.
Os03t0371350-00	26.5828	2.24099	-3.56829	4.78611	1.70042e-06	0.000117173	Similar to Cytochrome P450 family protein, expressed.
Os04t0581100-01	2.06262	0.174392	-3.56408	4.24702	2.16637e-05	0.00102118	2OG-Fe(II) oxygenase domain containing protein.
Os08t0505700-01	5.1816	0.43863	-3.56232	4.14446	3.40622e-05	0.0014844	Hypothetical conserved gene.
Os01t0138800-01	0.411845	0.034892	-3.56113	3.44022	0.000581235	0.0150489	Peptidase C26 domain containing protein.
Os02t0282000-01	0.20822	0.0177448	-3.55264	3.65384	0.000258352	0.00800095	NB-ARC domain containing protein.
Os09t0410500-00	0.359231	0.0307198	-3.54767	3.2633	0.00110125	0.0249531	Similar to teosinte-branched one.
Os02t0102200-01	4.77154	0.410184	-3.54011	4.99947	5.74886e-07	4.70765e-05	Similar to Transmembrane amino acid transporter protein.
Os04t0180400-01	5.66563	0.489169	-3.53383	5.0935	3.51519e-07	3.12568e-05	Similar to Cytochrome P450 CYP99A1 (EC 1.14.-.-) (Fragment).
Os06t0661200-00	1.74477	0.150712	-3.53318	3.72255	0.000197218	0.00638864	Similar to B-box zinc finger family protein.
Os02t0209400-01	4.9825	0.430605	-3.53243	4.30402	1.67724e-05	0.000830645	Conserved hypothetical protein.
Os05t0583000-01	1.09633	0.094755	-3.53233	3.51166	0.000445313	0.0122791	WRKY transcription factor 34.
Os06t0587900-00	0.581416	0.0504575	-3.52643	3.84335	0.000121367	0.00429073	Hypothetical conserved gene.
Os05t0411100-00	0.238853	0.0207878	-3.52231	3.23656	0.00120981	0.026855	Similar to peptide transporter PTR2.
Os07t0526600-01	0.287255	0.0250775	-3.51787	3.23248	0.00122723	0.0271439	Alpha/beta hydrolase fold-3 domain containing protein.
Os10t0558700-02	18.7455	1.64296	-3.51217	5.2634	1.41416e-07	1.44754e-05	2OG-Fe(II) oxygenase domain containing protein.
Os01t0699500-01	7.58684	0.665498	-3.51099	5.0579	4.23899e-07	3.65842e-05	Serine/threonine protein kinase domain containing protein.
Os01t0936700-01	19.1593	1.68081	-3.51082	6.10009	1.0601e-09	2.06234e-07	Conserved hypothetical protein.
Os08t0173600-01	1.5738	0.138195	-3.50948	3.39318	0.000690875	0.0172532	Hypothetical protein.
Os05t0571200-01	1.66025	0.146159	-3.50579	3.8785	0.000105101	0.00380353	Similar to WRKY transcription factor 19.
Os03t0226901-00	4.54187	0.404346	-3.48962	4.77414	1.80475e-06	0.000123396	Serine/threonine protein kinase domain containing protein.
Os01t0910900-01	79.7898	7.17271	-3.47561	6.03867	1.55386e-09	2.90539e-07	Conserved hypothetical protein.
Os01t0179000-01	3.86888	0.34956	-3.4683	4.72466	2.30499e-06	0.000153138	Transferase family protein.
Os10t0528300-01	0.68324	0.0621197	-3.45927	3.18997	0.0014229	0.0305134	Tau class GST protein 4.
Os05t0415800-01	0.303269	0.0275999	-3.45786	3.32872	0.000872457	0.0207574	Similar to Cytochrome P450 CYP51H10.
Os06t0495500-01	0.341696	0.0311568	-3.4551	3.32606	0.000880829	0.020886	Multi antimicrobial extrusion protein MatE family protein.
Os01t0385400-01	0.4454	0.040946	-3.44331	3.04811	0.00230288	0.043927	C4-dicarboxylate transporter/malic acid transport protein family protein.
Os04t0395800-01	5.60842	0.515672	-3.44307	4.42013	9.86429e-06	0.000524685	Tify domain containing protein.
Os02t0823100-01	19.5164	1.79706	-3.44098	5.75044	8.90106e-09	1.32807e-06	Similar to Plasma membrane intrinsic protein (Plasma membrane integral protein ZmPIP1-5).
Os08t0540400-01	8.59128	0.793126	-3.43725	5.47189	4.45261e-08	5.31476e-06	Similar to Calcium-dependent protein kinase.
Os12t0630200-01	70.9411	6.5777	-3.43097	6.4516	1.10679e-10	2.58095e-08	Thaumatin, pathogenesis-related family protein.
Os05t0588550-01	57.5106	5.33454	-3.43039	3.22139	0.00127572	0.0279532	Hypothetical gene.
Os06t0591400-01	8.51471	0.791499	-3.4273	4.51696	6.27338e-06	0.000358601	Conserved hypothetical protein.
Os11t0704500-01	178.094	16.597	-3.42364	6.58262	4.62244e-11	1.16995e-08	Metallothionein-like protein type 1.
Os08t0470700-00	9.16577	0.854353	-3.42335	4.61418	3.94645e-06	0.000245516	Similar to carbonic anhydrase.
Os11t0649700-01	0.800629	0.0747147	-3.42167	3.29388	0.000988139	0.022876	Uncharacterised protein family UPF0497, trans-membrane plant subgroup domain containing protein.
Os03t0800000-01	20.985	1.96275	-3.41842	3.19769	0.00138532	0.0298347	Similar to Nitrate and chloride transporter.
Os01t0783700-01	3.31438	0.310076	-3.41805	3.66246	0.000249801	0.00779787	Similar to EF-hand Ca2+-binding protein CCD1.
Os01t0274100-00	1.49269	0.140155	-3.41282	3.87782	0.000105395	0.00381024	FAD-dependent pyridine nucleotide-disulphide oxidoreductase domain containing protein.
Os08t0142900-00	3.05391	0.28678	-3.41264	3.6548	0.000257381	0.00798493	Pectinesterase inhibitor domain containing protein.
Os03t0741100-01	17.9583	1.68903	-3.41039	5.52102	3.37039e-08	4.16415e-06	Basic helix-loop-helix dimerisation region bHLH domain containing protein.
Os01t0124000-01	7.59147	0.714427	-3.40952	4.57484	4.76581e-06	0.000285398	Similar to Bowman Birk trypsin inhibitor.
Os10t0490100-01	2.94521	0.277857	-3.40595	3.93283	8.39531e-05	0.00313817	Virulence factor, pectin lyase fold family protein.
Os11t0126900-01	25.0179	2.36052	-3.40578	6.17831	6.47913e-10	1.32641e-07	Similar to NAC domain transcription factor.
Os06t0220900-00	15.4401	1.46205	-3.40062	3.67139	0.000241236	0.0075843	Conserved hypothetical protein.
Os03t0410000-01	10.2858	0.981276	-3.38985	5.18219	2.19299e-07	2.08702e-05	Similar to OSMYB3.
Os04t0494100-03	172.899	16.5151	-3.38807	7.1548	8.37996e-13	3.01097e-10	Similar to Chitinase.
Os12t0113600-01	2.59619	0.248097	-3.38742	3.08195	0.00205651	0.0400963	Hypothetical protein.
Os05t0584000-00	0.8844	0.0845459	-3.38689	3.37364	0.000741826	0.0182029	Similar to WRKY transcription factor 12.
Os12t0217800-01	9.91926	0.948672	-3.38625	4.49259	7.03633e-06	0.000393275	Hypothetical gene.
Os07t0684800-01	18.3138	1.75229	-3.38562	5.86569	4.4726e-09	7.19129e-07	Similar to NAM / CUC2-like protein.
Os03t0571700-01	2.70932	0.260403	-3.37911	4.23645	2.27086e-05	0.0010605	Similar to TRANSPARENT TESTA 12 protein.
Os02t0137700-01	18.894	1.82191	-3.37441	6.23058	4.64712e-10	9.62556e-08	NAD(P)-binding domain containing protein.
Os04t0531750-00	8.21127	0.793233	-3.37179	4.1911	2.77606e-05	0.00125482	Similar to OSIGBa0125M19.13 protein.
Os04t0206600-01	1.11619	0.108001	-3.36946	3.91545	9.02343e-05	0.00333753	UDP-glucuronosyl/UDP-glucosyltransferase family protein.
Os02t0785200-00	0.69996	0.067737	-3.36926	3.2374	0.00120623	0.0267974	Hypothetical conserved gene.
Os01t0137950-01	0.713213	0.069068	-3.36824	3.23643	0.00121035	0.026855	Similar to predicted protein.
Os04t0314100-00	1.47568	0.143014	-3.36715	3.68692	0.000226983	0.00721347	Similar to H0107B07.2 protein.
Os01t0959100-01	2.61903	0.254116	-3.36547	3.5298	0.000415866	0.0116495	Similar to Abscisic stress ripening protein 1.
Os03t0798500-00	0.625252	0.0606903	-3.3649	3.51845	0.000434074	0.0120158	Similar to WRKY DNA binding domain containing protein, expressed.
Os04t0204100-00	0.289997	0.0281927	-3.36265	3.07606	0.00209752	0.040738	Similar to H0825G02.3 protein.
Os12t0431100-01	6.27385	0.610666	-3.3609	4.91355	8.94439e-07	6.77312e-05	ATPase, AAA-type, core domain containing protein.
Os11t0539200-01	11.7147	1.14143	-3.35941	3.93774	8.22521e-05	0.0030943	Similar to Xyloglucan endotransglycosylase XET2 (Fragment).
Os01t0121500-01	6.20581	0.605056	-3.35848	4.06773	4.74741e-05	0.00195	Conserved hypothetical protein.
Os11t0274700-01	1.59663	0.156434	-3.35141	4.14865	3.34443e-05	0.00146109	Hypothetical conserved gene.
Os03t0640000-00	1.07874	0.105721	-3.35102	3.73166	0.000190224	0.00621611	Patatin family protein.
Os09t0365900-01	0.806876	0.0799454	-3.33526	3.79564	0.000147265	0.00503058	L-ascorbate oxidase precursor (EC 1.10.3.3) (Ascorbase) (ASO).
Os07t0170000-00	0.7895	0.078434	-3.33139	3.19796	0.00138406	0.0298347	Similar to Brn1-like protein.
Os07t0438600-01	14.6263	1.4531	-3.33136	4.81816	1.44886e-06	0.00010245	Proteinase inhibitor I9, subtilisin propeptide domain containing protein.
Os05t0142500-00	24.2799	2.42008	-3.32664	3.08351	0.00204576	0.039953	Hypothetical conserved gene.
Os10t0560400-01	16.75	1.67326	-3.32343	5.42609	5.76027e-08	6.65019e-06	Similar to CONSTANS-like protein CO9 (Fragment).
Os11t0540600-01	9.03678	0.902817	-3.3233	5.14083	2.73528e-07	2.52133e-05	Protein of unknown function DUF247, plant family protein.
Os07t0524900-01	3.30862	0.330695	-3.32266	4.35324	1.34138e-05	0.000681569	Protein of unknown function DUF6, transmembrane domain containing protein.
Os09t0314500-01	3.67951	0.368073	-3.32145	4.48286	7.36501e-06	0.000409694	Hypothetical conserved gene.
Os09t0272600-01	3.06595	0.307072	-3.31969	3.40311	0.000666246	0.016757	Conserved hypothetical protein.
Os04t0412100-01	12.8972	1.2925	-3.31883	4.94799	7.49824e-07	5.84132e-05	Conserved hypothetical protein.
Os06t0150000-00	0.996061	0.100079	-3.3151	3.18232	0.00146103	0.0311038
Os02t0269600-00	0.230475	0.0231998	-3.31242	3.17349	0.00150618	0.031815	Hypothetical conserved gene.
Os04t0571600-01	0.590394	0.0594483	-3.31197	3.63309	0.00028005	0.00854518	Multi antimicrobial extrusion protein MatE family protein.
Os02t0639100-00	1.83674	0.184979	-3.31172	3.80661	0.000140883	0.00484922	Similar to H0801D08.12 protein.
Os11t0451700-00	0.884646	0.0891085	-3.31147	3.52331	0.000426191	0.0118633	Similar to Dehydrin DHN1 (M3) (RAB-17 protein).
Os01t0975300-01	2.80209	0.28237	-3.31084	4.25793	2.06331e-05	0.00098446	Similar to Myb factor protein.
Os11t0557500-00	0.251397	0.0253351	-3.31076	3.1719	0.00151447	0.0319327	Protein kinase, core domain containing protein.
Os06t0127100-01	1.5516	0.156923	-3.30563	3.45429	0.000551746	0.0144232	Dehydration-responsive element-binding protein 1C.
Os12t0150200-01	32.0001	3.24432	-3.30209	6.33055	2.44296e-10	5.34296e-08	Cytochrome P450 family protein.
Os04t0556600-00	0.379108	0.0384765	-3.30056	3.16213	0.00156622	0.0327104	Similar to Cis-zeatin O-glucosyltransferase 1 (EC 2.4.1.215) (cisZOG1).
Os09t0546900-01	9.06874	0.921213	-3.2993	4.1979	2.69401e-05	0.00122557	Similar to Auxin induced protein.
Os06t0486000-01	1.02326	0.103997	-3.29856	4.0249	5.7e-05	0.00226785	Protein kinase, core domain containing protein.
Os05t0570900-00	2.83484	0.288242	-3.29791	3.71507	0.000203144	0.0065685	Cupredoxin domain containing protein.
Os04t0681500-01	3.38904	0.345032	-3.29607	4.26007	2.04367e-05	0.00097774	EF-Hand type domain containing protein.
Os06t0210400-01	0.15888	0.0162144	-3.29259	3.00472	0.00265823	0.0491346	Concanavalin A-like lectin/glucanase, subgroup domain containing protein.
Os05t0588500-01	29.2856	2.99103	-3.29148	5.37567	7.62999e-08	8.47531e-06	MtN3 and saliva related transmembrane protein family protein.
Os03t0639400-01	4.99175	0.510361	-3.28996	4.09252	4.26715e-05	0.00179088	Pectinesterase inhibitor domain containing protein.
Os05t0157000-01	7.59105	0.779139	-3.28435	3.55491	0.000378116	0.0108334	Conserved hypothetical protein.
Os07t0448100-01	121.069	12.4285	-3.28411	6.97021	3.16458e-12	1.01301e-09	Similar to Plasma membrane integral protein ZmPIP2-6.
Os04t0687800-01	11.4107	1.17179	-3.2836	5.26841	1.37613e-07	1.41685e-05	Protein of unknown function DUF6, transmembrane domain containing protein.
Os06t0611500-01	20.8102	2.14262	-3.27984	5.75153	8.84407e-09	1.32518e-06	Similar to Polygalacturonase (Fragment).
Os04t0171600-01	20.7212	2.13435	-3.27924	5.23328	1.66531e-07	1.65647e-05	Similar to Cytochrome P450 79A1 (EC 1.14.13.41) (Tyrosine N-monooxygenase) (Cytochrome P450Tyr).
Os03t0228200-01	8.45998	0.872449	-3.27751	4.85733	1.18979e-06	8.69187e-05	Conserved hypothetical protein.
Os04t0531900-01	376.458	38.838	-3.27695	7.20758	5.69544e-13	2.17987e-10	Short-chain dehydrogenase/reductase SDR domain containing protein.
Os02t0178100-01	73.9578	7.6902	-3.26561	6.70968	1.95046e-11	5.40785e-09	CCT domain containing protein.
Os01t0778400-00	16.6822	1.73512	-3.2652	3.90734	9.33191e-05	0.00344079	Conserved hypothetical protein.
Os04t0655300-01	10.0824	1.04903	-3.2647	5.63449	1.75576e-08	2.42447e-06	Protein kinase, core domain containing protein.
Os01t0124700-01	75.7939	7.89374	-3.2633	5.25734	1.46156e-07	1.48709e-05	Conserved hypothetical protein.
Os01t0627900-01	0.324156	0.0338595	-3.25906	3.27556	0.00105452	0.0241429	Similar to Cytochrome P450.
Os07t0217600-01	1.40274	0.146776	-3.25656	3.85267	0.000116835	0.00415137	Cytochrome P450 family protein.
Os03t0371400-01	22.9427	2.40747	-3.25245	4.69726	2.63672e-06	0.000171299	Cytochrome P450 family protein.
Os09t0561600-01	0.341607	0.0358973	-3.25039	3.38313	0.000716634	0.0177206	Serine/threonine protein kinase-related domain containing protein.
Os09t0262000-00	0.620642	0.0653163	-3.24824	3.10884	0.0018782	0.0375129	Similar to Cinnamoyl CoA reductase.
Os04t0188433-01	9.10938	0.959065	-3.24765	4.06307	4.84324e-05	0.00197842	Conserved hypothetical protein.
Os04t0178300-02	11.6247	1.23461	-3.23507	5.19902	2.00346e-07	1.93276e-05	Similar to Syn-copalyl diphosphate synthase.
Os06t0106800-01	15.6949	1.67097	-3.23154	4.38065	1.18327e-05	0.000611824	Conserved hypothetical protein.
Os11t0625900-01	1.6187	0.172364	-3.2313	4.08363	4.43377e-05	0.00184541	Protein kinase, core domain containing protein.
Os04t0112100-01	1.48123	0.158188	-3.22709	4.01153	6.03267e-05	0.00237344	NB-ARC domain containing protein.
Os02t0121700-01	0.834826	0.0897174	-3.21802	3.68194	0.000231467	0.0073361	Terpenoid synthase domain containing protein.
Os01t0115600-01	0.85035	0.0914097	-3.21764	3.68151	0.000231858	0.00734189	Similar to LRK14.
Os07t0624600-01	20.0284	2.15336	-3.21738	5.64859	1.61772e-08	2.25151e-06	Similar to Trehalose-6-phosphate phosphatase.
Os09t0358500-00	0.511405	0.0550451	-3.21578	3.22542	0.00125787	0.0276616	Hypothetical conserved gene.
Os07t0131400-00	0.250627	0.0270445	-3.21213	3.06785	0.00215607	0.0416911	Similar to lectin-like receptor kinase 7.
Os06t0299200-00	0.830797	0.0897256	-3.2109	3.17955	0.00147503	0.0313262	Similar to H0207B04.1 protein.
Os02t0454500-01	1.01931	0.110201	-3.20938	3.63517	0.000277797	0.00848377	Membrane bound O-acyl transferase, MBOAT family protein.
Os03t0210200-01	2.41824	0.26158	-3.20863	3.34642	0.000818627	0.0197105	Proteinase inhibitor I25, cystatin domain containing protein.
Os06t0568600-01	1.83538	0.199172	-3.20399	4.00757	6.13461e-05	0.00241085	Similar to Ent-kaurene oxidase 1 (Fragment).
Os04t0513400-01	9.22782	1.00364	-3.20075	4.25654	2.07617e-05	0.000989258	Similar to Beta-glucosidase.
Os01t0862800-01	0.422295	0.0460355	-3.19743	3.05381	0.00225958	0.0433003	No apical meristem (NAM) protein domain containing protein.
Os03t0249600-00	39.8533	4.3504	-3.19548	4.9156	8.85101e-07	6.73135e-05
Os01t0124650-02	35.9959	3.93262	-3.19427	3.74945	0.00017722	0.00588149	Hypothetical conserved gene.
Os01t0864500-01	3.23342	0.353679	-3.19255	3.88414	0.000102693	0.00373172	Harpin-induced 1 domain containing protein.
Os07t0115500-01	9.29453	1.0176	-3.19121	4.20073	2.66055e-05	0.00121458	Conserved hypothetical protein.
Os01t0881100-01	0.66307	0.0726416	-3.19029	3.48373	0.000494486	0.0133834	Epsin-like, N-terminal domain containing protein.
Os01t0195900-00	1.03975	0.11401	-3.18901	3.3787	0.000728295	0.0179711	Hypothetical conserved gene.
Os10t0505900-01	0.384481	0.0422285	-3.18663	3.14979	0.00163389	0.0337831	Conserved hypothetical protein.
Os07t0519600-00	0.892289	0.0984236	-3.18044	3.42307	0.000619188	0.0157973	Similar to taxane 10-beta-hydroxylase.
Os11t0669100-01	0.768511	0.0849715	-3.17701	3.66259	0.000249679	0.00779787	Calmodulin binding protein-like family protein.
Os06t0685100-00	10.7909	1.19315	-3.17696	5.46288	4.68479e-08	5.55424e-06	Similar to COBRA-like protein 10 precursor.
Os01t0633100-01	50.0453	5.55976	-3.17014	6.72781	1.72233e-11	4.85174e-09	Similar to ADP-glucose pyrophosphorylase subunit SH2.
Os07t0561500-01	21.9022	2.44466	-3.16337	5.14737	2.64163e-07	2.44782e-05	Short-chain dehydrogenase/reductase SDR domain containing protein.
Os01t0384450-01	2.59325	0.289815	-3.16156	3.50165	0.000462384	0.01264	Hypothetical protein.
Os04t0172400-01	0.595247	0.0666047	-3.15979	3.27959	0.00103959	0.0238632	Transferase family protein.
Os05t0149400-01	11.4946	1.28835	-3.15737	4.95914	7.08046e-07	5.57756e-05	Similar to 1-aminocyclopropane-1-carboxylic acid oxidase.
Os04t0604300-01	11.4964	1.28861	-3.1573	4.47596	7.60701e-06	0.000419183	Similar to Xyloglucan endotransglucosylase/hydrolase protein 24 precursor (EC 2.4.1.207) (At-XTH24) (XTH-24) (Meristem protein 5) (MERI-5 protein) (MERI5 protein) (Endo-xyloglucan transferase) (Xyloglucan endo-1,4-beta-D-glucanase).
Os05t0339300-01	0.408352	0.0457825	-3.15694	3.11754	0.00182367	0.0367364	Conserved hypothetical protein.
Os08t0490400-00	19.7928	2.22086	-3.15579	4.52867	5.93569e-06	0.000343762	Hypothetical gene.
Os05t0526700-01	8.36851	0.94056	-3.15338	4.42597	9.60086e-06	0.000513777	Harpin-induced 1 domain containing protein.
Os11t0129000-00	14.9156	1.67711	-3.15277	5.18768	2.12925e-07	2.04292e-05	Similar to MATE efflux family protein, expressed.
Os03t0407900-01	1.93788	0.220698	-3.13434	3.98049	6.87744e-05	0.00265245	Similar to Serine/threonine protein kinase-like.
Os03t0284700-01	10.3637	1.18118	-3.13325	4.32473	1.5272e-05	0.000762775	Hypothetical protein.
Os11t0582000-00	1.1575	0.132038	-3.13199	3.09578	0.00196297	0.038897	Hypothetical conserved gene.
Os07t0530400-01	2.7183	0.312432	-3.12109	4.00383	6.23252e-05	0.00244115	Ribosomal protein S14, conserved site domain containing protein.
Os01t0175700-00	17.0264	1.96479	-3.11533	5.6535	1.57211e-08	2.19672e-06	Similar to cDNA clone:J023086K01, full insert sequence.
Os08t0398500-01	74.7113	8.65283	-3.11008	5.86343	4.53397e-09	7.25683e-07	Similar to KED-like protein.
Os04t0481700-01	0.480563	0.0556765	-3.10959	3.33589	0.000850269	0.0203764	Similar to Multidrug resistance p-glycoprotein; ABC transporter-like protein.
Os04t0500900-00	1.40509	0.162859	-3.10897	3.43161	0.000600019	0.0153769	Similar to H0311C03.1 protein.
Os09t0546000-00	2.92693	0.339945	-3.10601	3.29077	0.000999143	0.0230897	Similar to Auxin induced protein.
Os02t0569000-01	0.416516	0.0484531	-3.10371	3.14343	0.00166983	0.0343848	Cytochrome P450 family protein.
Os02t0498650-01	0.528889	0.0617612	-3.09819	3.41445	0.000639106	0.0161784	Non-protein coding transcript.
Os03t0699000-01	0.992938	0.115961	-3.09806	3.21081	0.00132363	0.0288413	Oleosin 18 kDa (OSE721).
Os02t0571100-01	47.9878	5.62108	-3.09375	5.9567	2.57377e-09	4.46441e-07	Terpenoid synthase domain containing protein.
Os11t0210201-00	9.94627	1.16537	-3.09337	3.95959	7.50776e-05	0.00286418	Conserved hypothetical protein.
Os01t0920500-01	3.9007	0.457346	-3.09238	3.67632	0.000236623	0.00747934	Conserved hypothetical protein.
Os02t0751900-01	4.79976	0.564697	-3.08741	4.53985	5.62942e-06	0.000330372	Similar to Type I inositol-1,4,5-trisphosphate 5-phosphatase CVP2 (EC 3.1.3.56) (Cotyledon vascular pattern 2 protein).
Os01t0128000-01	1.24586	0.146833	-3.08489	3.60463	0.000312594	0.00930508	Myb transcription factor domain containing protein.
Os02t0461500-01	5.99663	0.709549	-3.07918	4.2717	1.93985e-05	0.000939558	FAS1 domain domain containing protein.
Os05t0114100-00	0.89697	0.106366	-3.07602	3.29785	0.000974282	0.0226146	Similar to endonuclease/exonuclease/phosphatase family protein.
Os04t0600300-01	0.610447	0.0723934	-3.07593	3.18307	0.0014572	0.0310766	Alternative oxidase 1b.
Os02t0519100-01	0.416788	0.0494604	-3.07497	3.3853	0.000711011	0.0176187	Similar to Potassium transporter 1 (OsHAK1). Splice isoform 2.
Os03t0153900-01	1.15401	0.136954	-3.0749	3.56227	0.000367666	0.010603	Aromatic-ring hydroxylase family protein.
Os09t0323500-01	27.3664	3.24814	-3.07472	5.39167	6.98065e-08	7.80326e-06	Protein of unknown function DUF833 family protein.
Os12t0434400-00	0.63015	0.0750129	-3.07048	3.28986	0.00100236	0.0231443	Similar to predicted protein.
Os12t0560100-00	0.875665	0.104255	-3.07026	3.23799	0.00120373	0.0267588	Similar to Lipoxygenase (EC 1.13.11.12).
Os05t0130300-01	2.74958	0.328692	-3.0644	3.60974	0.000306507	0.0091619	Conserved hypothetical protein.
Os04t0447700-01	5.06586	0.608089	-3.05845	4.15552	3.24543e-05	0.00142669	Similar to Polyketide reductase.
Os07t0684000-01	141.954	17.067	-3.05614	6.51948	7.05513e-11	1.70154e-08	Ricin B-related lectin domain containing protein.
Os02t0620600-01	1.00945	0.121482	-3.05476	3.56432	0.000364798	0.0105495	Ammonium transporter family protein.
Os04t0562650-00	0.814855	0.0981148	-3.054	3.01948	0.00253208	0.0472674	Hypothetical gene.
Os01t0211800-01	2.00096	0.241751	-3.0491	3.77011	0.000163173	0.00547203	Similar to VirE2-interacting protein VIP1.
Os01t0368900-01	6.46262	0.781546	-3.04772	3.93748	8.23419e-05	0.00309437	Similar to GLUTAREDOXIN.
Os08t0335500-01	1.41495	0.171442	-3.04496	3.70327	0.000212837	0.00682618	Hypothetical conserved gene.
Os05t0370700-01	0.799871	0.096976	-3.04407	3.14767	0.00164576	0.0339885	Alpha/beta hydrolase family protein.
Os04t0622600-00	0.820562	0.0995262	-3.04346	3.52769	0.000419201	0.0117243	Similar to XA1.
Os01t0339851-01	7.64694	0.928225	-3.04234	3.29951	0.000968537	0.022531	Hypothetical protein.
Os04t0526600-01	2.01034	0.244101	-3.04189	3.39063	0.000697311	0.0173647	Similar to Alpha-amylase/subtilisin inhibitor (RASI).
Os02t0624100-00	1.17886	0.143325	-3.04003	3.73533	0.00018747	0.00615211	Similar to OSIGBa0145M07.8 protein.
Os03t0188500-01	67.6093	8.23363	-3.03762	5.42325	5.85249e-08	6.7321e-06	Glutelin family protein.
Os12t0226700-01	47.5057	5.78904	-3.0367	5.92808	3.06491e-09	5.2136e-07	Similar to Allyl alcohol dehydrogenase.
Os10t0403400-01	5.71588	0.697358	-3.035	4.39985	1.08326e-05	0.000566771	Hypothetical protein.
Os04t0657300-00	88.846	10.8549	-3.03296	4.94854	7.47709e-07	5.84132e-05	Non-protein coding transcript.
Os01t0113900-01	0.529569	0.0648531	-3.02957	3.32994	0.000868652	0.0207089	Serine/threonine protein kinase-related domain containing protein.
Os04t0147200-01	0.276135	0.0338318	-3.02892	3.12709	0.00176548	0.0358586	Protein of unknown function DUF594 domain containing protein.
Os03t0287100-01	11.8734	1.46124	-3.02248	4.67589	2.92686e-06	0.000187383	Phosphatidylinositol transfer protein family protein.
Os12t0123700-00	23.8634	2.94337	-3.01926	5.27939	1.29617e-07	1.35032e-05	NAC-domain containing protein 18 (ANAC018) (NO APICAL MERISTEM protein) (AtNAM).
Os02t0580600-01	2.05813	0.254718	-3.01436	3.77879	0.000157595	0.00530013	Similar to Dimethylaniline monooxygenase-like protein.
Os04t0632901-00	0.405039	0.0503329	-3.00849	3.26121	0.00110936	0.0251208	Similar to H0613A10.1 protein.
Os08t0535200-01	152.326	18.9294	-3.00847	6.67562	2.46192e-11	6.66839e-09	Similar to MtN3-like protein.
Os11t0592100-01	79.7847	9.92034	-3.00765	5.714	1.10353e-08	1.60569e-06	Similar to Barwin.
Os02t0181700-00	0.740178	0.0920532	-3.00733	3.03786	0.00238267	0.0451797	Hypothetical conserved gene.
Os09t0502500-01	2.63729	0.328393	-3.00556	3.7803	0.000156637	0.00527798	Alcohol dehydrogenase superfamily, zinc-containing protein.
Os12t0242100-01	6.02896	0.756651	-2.99421	4.03001	5.57737e-05	0.00222665	Similar to Glycine-rich cell wall structural protein 1 precursor.
Os02t0770800-01	0.584605	0.0735526	-2.99061	3.50573	0.000455348	0.0125263	Similar to Nitrate reductase [NAD(P)H] (EC 1.7.1.2).
Os12t0117500-01	19.6201	2.47231	-2.9884	5.42206	5.89154e-08	6.73549e-06	Similar to RPT2-like protein.
Os06t0726100-01	18.9854	2.39816	-2.98489	5.03488	4.78156e-07	4.03761e-05	Similar to Seed chitinase-c.
Os04t0513400-02	3.37136	0.426689	-2.98208	3.17062	0.00152115	0.0320447	Similar to Beta-glucosidase.
Os08t0521200-01	6.74521	0.854472	-2.98076	4.94847	7.47989e-07	5.84132e-05	Similar to Receptor-like protein kinase 1.
Os02t0185300-01	15.5898	1.9937	-2.96708	5.27326	1.34018e-07	1.38796e-05	Cytochrome P450 family protein.
Os06t0602900-01	1.13629	0.145368	-2.96655	3.31171	0.000927287	0.0217305	Similar to NADP-dependent oxidoreductase P2.
Os01t0890200-00	0.673666	0.0862726	-2.96506	3.4182	0.000630377	0.016015	Hypothetical conserved gene.
Os06t0281300-01	0.315642	0.0405342	-2.96108	3.10722	0.00188855	0.0376555	Similar to O-methyltransferase ZRP4.
Os06t0569900-01	1.47219	0.189286	-2.95932	3.61461	0.000300805	0.00902211	Similar to Ent-kaurene oxidase 1 (Fragment).
Os01t0555100-01	20.9674	2.70147	-2.95633	4.83874	1.30663e-06	9.42809e-05	Similar to TATA-binding protein associated factor 2N (RNA-binding protein 56) (TAFII68) (TAF(II)68).
Os07t0620600-01	5.94049	0.766426	-2.95436	4.36467	1.27315e-05	0.000653501	Conserved hypothetical protein.
Os01t0200700-01	8997.93	1162.04	-2.95293	5.03566	4.76209e-07	4.03083e-05	Similar to Metallothionein-like protein type 3 (MT-3) (MWMT3).
Os11t0665950-01	3.99593	0.51609	-2.95284	3.32277	0.000891279	0.0210786	Protein kinase-like domain containing protein.
Os01t0389700-01	2.38427	0.308475	-2.95033	3.45851	0.000543177	0.014284	Protein of unknown function DUF679 family protein.
Os04t0175600-01	5.78306	0.749558	-2.94772	4.20211	2.64433e-05	0.00121082	Similar to 0-methyltransferase (EC 2.1.1.6) (Fragment).
Os03t0203451-00	3.30605	0.428827	-2.94664	3.27798	0.00104554	0.0239685	Non-protein coding transcript.
Os03t0742300-01	14.1387	1.83951	-2.94225	4.11173	3.92707e-05	0.00167207	Signal transduction response regulator, receiver region domain containing protein.
Os03t0678800-00	0.70849	0.0922569	-2.94102	3.08618	0.00202749	0.0397949	Glycosyl transferase, family 8 protein.
Os05t0156900-01	5.16816	0.67404	-2.93875	3.97416	7.06272e-05	0.00271498	Similar to Inorganic pyrophosphatase (EC 3.6.1.1) (Fragment).
Os05t0372900-01	45.9365	6.00942	-2.93434	5.55628	2.75579e-08	3.54515e-06	Conserved hypothetical protein.
Os07t0130100-01	0.699212	0.0922744	-2.92173	3.38968	0.000699748	0.0174131	Similar to Resistance protein candidate (Fragment).
Os04t0324100-01	1.54306	0.204351	-2.91668	3.55277	0.000381202	0.0108952	UDP-glucuronosyl/UDP-glucosyltransferase family protein.
Os07t0564100-01	15.2172	2.01603	-2.91611	4.74018	2.13533e-06	0.000143491	UDP-glucuronosyl/UDP-glucosyltransferase family protein.
Os04t0587500-01	2.0179	0.267423	-2.91566	3.6027	0.000314928	0.00935803	HAT dimerisation domain containing protein.
Os03t0184550-01	6.75805	0.895884	-2.91522	4.19761	2.69742e-05	0.00122557	Similar to Dihydroflavonol-4-reductase.
Os07t0581700-01	2.16145	0.286701	-2.91438	3.50334	0.000459467	0.0126101	Similar to HAHB-7 (Fragment).
Os05t0342000-00	4.16716	0.554993	-2.90852	3.5615	0.000368744	0.0106051	Hypothetical conserved gene.
Os02t0528900-01	1.48634	0.198025	-2.90801	4.06437	4.8163e-05	0.0019697	Similar to PDR9 ABC transporter.
Os03t0718800-01	26.9674	3.60195	-2.90437	4.72373	2.31554e-06	0.00015355	Similar to Physical impedance induced protein.
Os02t0738300-01	2.80783	0.375355	-2.90313	3.62406	0.000290011	0.00877309	Conserved hypothetical protein.
Os04t0179700-01	5.1955	0.694663	-2.90288	4.6964	2.64791e-06	0.00017171	Syn-pimara-7,15-diene synthase.
Os03t0663400-02	21.7351	2.91129	-2.9003	4.68916	2.74326e-06	0.000176592	Similar to Thaumatin-like protein.
Os01t0954000-01	5.50442	0.73833	-2.89825	3.68893	0.000225201	0.00716978	NADPH-dependent FMN reductase family protein.
Os02t0615300-00	1.55076	0.208489	-2.89493	3.91039	9.21459e-05	0.00340109	Protein kinase, core domain containing protein.
Os07t0167500-01	1.24335	0.167363	-2.89318	3.26935	0.00107795	0.024504	Conserved hypothetical protein.
Os12t0170800-01	5.20368	0.700752	-2.89256	3.85018	0.000118032	0.00418544	Similar to Citrate binding protein precursor.
Os10t0532300-01	90.6903	12.3255	-2.87931	5.88792	3.91075e-09	6.44207e-07	Heavy metal transport/detoxification protein domain containing protein.
Os01t0700500-01	0.690357	0.0940527	-2.8758	3.1131	0.0018513	0.0371667	Cytochrome P450 family protein.
Os02t0156600-00	0.446236	0.060809	-2.87545	3.10132	0.00192663	0.0382947	Hypothetical conserved gene.
Os01t0124100-01	5.56316	0.760913	-2.8701	3.81722	0.000134965	0.00470532	Proteinase inhibitor I12, Bowman-Birk family protein.
Os06t0145000-00	7.89311	1.08027	-2.86921	4.36336	1.28079e-05	0.000656464	Similar to Pectate lyase homolog (EC 4.2.2.2).
Os06t0213300-00	4.18519	0.574105	-2.86591	3.0648	0.00217813	0.0420253	Similar to EF hand family protein.
Os01t0198900-03	17.1715	2.36252	-2.86161	4.59729	4.2803e-06	0.000262574	Conserved hypothetical protein.
Os07t0120500-00	3.4986	0.48168	-2.86063	3.13725	0.00170541	0.0349335	Similar to predicted protein.
Os03t0297000-01	13.8576	1.91763	-2.85328	4.32822	1.50318e-05	0.000753987	Protein of unknown function DUF538 family protein.
Os07t0526400-01	4.51165	0.624652	-2.85253	4.10323	4.07424e-05	0.00172223	Polyketide synthase, type III domain containing protein.
Os06t0674000-01	1.79725	0.249219	-2.8503	3.00675	0.00264055	0.0488817	Hypothetical conserved gene.
Os11t0130200-01	1.17447	0.16307	-2.84845	3.11197	0.00185843	0.0372236	Protein of unknown function DUF309 family protein.
Os12t0615700-01	3.66131	0.508959	-2.84674	4.05723	4.96586e-05	0.00201682	Similar to TRANSPARENT TESTA 12 protein.
Os07t0663500-00	1.5461	0.215693	-2.84158	3.10541	0.00190015	0.0378653	Similar to Short-chain dehydrogenase/reductase (Fragment).
Os06t0259901-00	50.0538	6.98351	-2.84146	4.26186	2.02733e-05	0.000973893	Non-protein coding transcript.
Os01t0309800-01	51.398	7.23936	-2.82778	5.62767	1.82664e-08	2.50271e-06	Similar to Hydrogenase expression/formation protein hypB.
Os11t0496400-01	4.40285	0.620284	-2.82744	3.61623	0.000298923	0.00897329	Octicosapeptide/Phox/Bem1p domain containing protein.
Os01t0665900-00	2.49354	0.352411	-2.82287	3.00661	0.00264177	0.0488817	Conserved hypothetical protein.
Os03t0794200-00	3.93963	0.557834	-2.82015	3.24366	0.00118004	0.0263484	Acyl-CoA N-acyltransferase domain containing protein.
Os12t0123300-00	1.72768	0.245144	-2.81713	3.3507	0.000806069	0.0194806
Os06t0590500-01	1.28579	0.182446	-2.81711	3.17398	0.00150362	0.031799	Similar to Syntaxin 121 (AtSYP121) (Syntaxin-related protein At-Syr1).
Os05t0142000-01	27.4273	3.8964	-2.8154	4.4803	7.45387e-06	0.000412682	Conserved hypothetical protein.
Os06t0133400-01	11.2322	1.5969	-2.81429	3.58054	0.000342879	0.0100195	Conserved hypothetical protein.
Os04t0179100-01	11.4068	1.62415	-2.81214	3.57781	0.000346492	0.0101166	Similar to OSIGBa0109M01.2 protein.
Os11t0592200-01	282.122	40.3225	-2.80666	6.11795	9.47861e-10	1.85423e-07	Similar to Chitin-binding allergen Bra r 2 (Fragments).
Os01t0965900-01	7.67082	1.09642	-2.80658	4.01516	5.94053e-05	0.00234179	Conserved hypothetical protein.
Os06t0140900-01	5.84981	0.838204	-2.80302	3.47458	0.000511652	0.0137319	Sigma factor, regions 3 and 4 domain containing protein.
Os01t0804400-01	3.12259	0.44885	-2.79844	3.86439	0.000111366	0.00398519	Cytochrome P450 family protein.
Os05t0515200-01	3.3018	0.475181	-2.7967	4.12511	3.70561e-05	0.00159318	Cytochrome P450 family protein.
Os04t0398000-01	12.5707	1.80974	-2.79622	4.42294	9.7367e-06	0.000519468	Pathogenesis-related transcriptional factor and ERF domain containing protein.
Os04t0126900-01	3.66316	0.527558	-2.79569	3.27287	0.0010646	0.0243263	Conserved hypothetical protein.
Os04t0457400-00	51.7979	7.46336	-2.795	4.34059	1.42103e-05	0.000718927	Hypothetical conserved gene.
Os02t0602000-01	2.39824	0.347014	-2.78891	3.48035	0.000500757	0.0135013	Remorin, C-terminal region domain containing protein.
Os08t0249000-01	30.1343	4.37324	-2.78463	5.00356	5.62825e-07	4.64127e-05	Zinc finger, B-box domain containing protein.
Os04t0511200-01	100.123	14.5322	-2.78445	5.88774	3.91515e-09	6.44207e-07	EFA27 for EF hand, abscisic acid, 27kD.
Os11t0549000-00	1.19322	0.173423	-2.78249	3.03236	0.00242651	0.0458382	Similar to Protein kinase domain containing protein, expressed.
Os04t0191400-01	24.7454	3.60121	-2.78061	4.41286	1.02013e-05	0.000537737	Conserved hypothetical protein.
Os07t0211500-00	2.57848	0.375386	-2.78007	3.81458	0.000136414	0.00474177	Similar to BHLH protein.
Os03t0319000-01	16.448	2.39467	-2.78001	4.02841	5.61545e-05	0.00223678	Conserved hypothetical protein.
Os12t0542200-00	7.51533	1.09678	-2.77656	4.19855	2.68627e-05	0.00122366	Similar to Extensin-like protein.
Os02t0629000-01	3.72092	0.544296	-2.77319	3.52285	0.000426929	0.0118744	Protein of unknown function DUF584 family protein.
Os02t0170300-01	21.7505	3.19044	-2.76922	4.98273	6.26929e-07	5.02857e-05	Similar to MADS box protein ZMM17.
Os07t0663700-01	21.8046	3.21199	-2.7631	5.14421	2.68656e-07	2.48291e-05	Glucose/ribitol dehydrogenase family protein.
Os05t0572000-00	4.74295	0.703459	-2.75325	3.8165	0.000135357	0.00471432	Pathogenesis-related transcriptional factor and ERF domain containing protein.
Os08t0465700-01	4.38664	0.651598	-2.75106	3.99729	6.40705e-05	0.0024984	Cytochrome P450 family protein.
Os04t0198733-00	3.06713	0.456499	-2.74821	3.32216	0.00089323	0.0210948	Hypothetical conserved gene.
Os03t0399000-01	13.5388	2.01527	-2.74805	4.59568	4.31331e-06	0.000264139	Pectin lyase fold domain containing protein.
Os02t0756850-01	16.0477	2.39267	-2.74567	3.26776	0.00108402	0.0246261	Conserved hypothetical protein.
Os01t0756700-01	5.69371	0.850076	-2.74371	4.24353	2.20026e-05	0.00103577	Similar to Potassium channel (Fragment).
Os08t0527900-00	0.459282	0.0685895	-2.74332	3.01623	0.00255937	0.0476073	Peptidase C19, ubiquitin carboxyl-terminal hydrolase 2 family protein.
Os12t0538700-01	27.9418	4.17337	-2.74314	4.84885	1.2418e-06	9.01574e-05	Similar to AT.I.24-1 protein (Fragment).
Os09t0558800-01	83.3649	12.4655	-2.7415	4.43499	9.2076e-06	0.000497123	Hypothetical conserved gene.
Os08t0395700-01	7.26201	1.08668	-2.74044	4.16911	3.05787e-05	0.00136123	Conserved hypothetical protein.
Os06t0673700-01	13.4351	2.01239	-2.73903	3.73858	0.000185063	0.00608444	Conserved hypothetical protein.
Os10t0579400-01	7.92621	1.18778	-2.73836	3.74744	0.000178652	0.00591787	Similar to WRKY transcription factor 66.
Os03t0820300-01	7.15447	1.07231	-2.73813	3.74604	0.000179648	0.00594526	Similar to ZPT2-14.
Os02t0800300-01	338.127	50.7181	-2.73699	6.06853	1.29089e-09	2.45702e-07	Conserved hypothetical protein.
Os02t0580000-01	28.0734	4.21174	-2.73671	4.87871	1.0678e-06	7.88247e-05	Protein of unknown function Cys-rich domain containing protein.
Os11t0625801-01	0.966545	0.145272	-2.73408	3.45584	0.000548586	0.0143726	Non-protein coding transcript.
Os07t0616800-01	75.9233	11.4799	-2.72544	6.03809	1.55946e-09	2.90539e-07	Sucrose synthase 3 (EC 2.4.1.13) (Sucrose-UDP glucosyltransferase 3).
Os01t0899700-01	58.7165	8.87975	-2.72517	5.79969	6.64385e-09	1.02607e-06	Pollen Ole e 1 allergen and extensin domain containing protein.
Os11t0114300-01	3.62211	0.549764	-2.71995	3.08945	0.00200529	0.0395133	Hypothetical protein.
Os05t0366600-01	30.703	4.66256	-2.71918	5.57792	2.43412e-08	3.16274e-06	Similar to Hydroxyisourate hydrolase.
Os07t0694200-01	1.40695	0.213716	-2.7188	3.17701	0.00148802	0.0315449	Conserved hypothetical protein.
Os07t0539700-01	6.52703	0.992823	-2.71682	4.48618	7.25104e-06	0.000403993	Hypothetical conserved gene.
Os07t0119800-00	7.78845	1.18537	-2.716	3.62707	0.000286655	0.00870897	Protein of unknown function DUF538 family protein.
Os05t0590201-01	0.837384	0.127451	-2.71595	3.49467	0.000474644	0.0129359	Hypothetical gene.
Os05t0322900-01	14.6548	2.23518	-2.71291	3.72843	0.00019268	0.00626468	Similar to WRKY transcription factor 45.
Os04t0630800-01	8.05748	1.22985	-2.71184	4.10561	4.03245e-05	0.00170662	Similar to Anthocyanidin reductase.
Os01t0123900-02	45.6611	6.97127	-2.71147	3.14709	0.00164905	0.0340365	Similar to Bowman-Birk type proteinase inhibitor (EBI).
Os01t0111700-01	2.37414	0.363922	-2.7057	3.22528	0.00125849	0.0276616	Conserved hypothetical protein.
Os06t0726300-00	3.80009	0.583081	-2.70427	3.62585	0.000288017	0.00873434	Similar to NAM-like protein.
Os08t0249900-00	1.78677	0.274194	-2.70409	3.15916	0.00158223	0.0328887	Conserved hypothetical protein.
Os08t0402500-01	8.98631	1.38021	-2.70284	3.89225	9.93207e-05	0.00363921	Conserved hypothetical protein.
Os04t0500300-01	58.2637	8.95726	-2.70147	4.93228	8.1277e-07	6.26242e-05	Conserved hypothetical protein.
Os09t0455500-01	1.65992	0.25544	-2.70006	3.23498	0.00121651	0.0269578	Alpha/beta hydrolase fold-3 domain containing protein.
Os02t0829850-00	10.3759	1.59792	-2.69897	4.28525	1.82533e-05	0.000890213	Similar to predicted protein.
Os10t0104800-02	2.46849	0.380809	-2.69649	3.24982	0.00115476	0.0259486	Protein kinase, core domain containing protein.
Os08t0518600-01	1.36558	0.210963	-2.69445	3.2453	0.00117327	0.0262536	Hypothetical protein.
Os10t0524300-01	6.20941	0.959427	-2.69421	3.25793	0.00112226	0.0253153	Peptidoglycan-binding lysin domain domain containing protein.
Os09t0400600-01	6.53001	1.00937	-2.69363	3.20732	0.00133976	0.029067	Conserved hypothetical protein.
Os02t0615800-02	91.5447	14.1691	-2.69173	3.97802	6.94903e-05	0.00267712	Hypothetical conserved gene.
Os08t0403300-00	4.11072	0.6371	-2.6898	2.99793	0.00271821	0.0499289	Heavy metal transport/detoxification protein domain containing protein.
Os01t0850900-01	23.6997	3.71114	-2.67494	4.56438	5.00982e-06	0.00029698	SOUL haem-binding protein domain containing protein.
Os04t0338100-01	234.399	36.7694	-2.67239	6.0031	1.93581e-09	3.50825e-07	Similar to IN2-2 protein.
Os08t0331000-01	10.2192	1.60461	-2.67099	3.31827	0.000905777	0.0213339	Conserved hypothetical protein.
Os01t0743200-01	3.23818	0.51035	-2.66563	3.3389	0.000841119	0.0202029	Pectin lyase fold/virulence factor domain containing protein.
Os09t0439200-01	77.2913	12.1832	-2.66542	5.62903	1.81225e-08	2.49269e-06	Tify domain containing protein.
Os12t0635400-01	27.5101	4.34052	-2.66402	4.52658	5.99473e-06	0.000346099	VQ domain containing protein.
Os01t0116400-01	1.18227	0.186567	-2.66379	3.34855	0.000812357	0.0195974	Protein kinase, core domain containing protein.
Os02t0267200-00	7.13524	1.12739	-2.66197	3.42584	0.000612901	0.0156728	Alpha-expansin OsEXPA13.
Os04t0593400-00	196.037	31.2237	-2.65041	5.44108	5.29573e-08	6.20417e-06	Bet v I allergen family protein.
Os04t0441800-01	13.1406	2.09426	-2.64952	3.53121	0.00041367	0.0116158	TGF-beta receptor, type I/II extracellular region family protein.
Os11t0637600-00	1.27327	0.203111	-2.64819	3.16484	0.00155171	0.0324651
Os09t0471400-01	14.3473	2.28913	-2.64791	4.42898	9.4681e-06	0.000508994	Serine/threonine protein kinase domain containing protein.
Os02t0720100-01	1.65401	0.2641	-2.64681	3.06266	0.00219378	0.0422578	Cupredoxin domain containing protein.
Os01t0197700-01	4.08061	0.651879	-2.64611	4.00445	6.21623e-05	0.00243748	Hypothetical protein.
Os04t0644000-01	4.10896	0.660966	-2.63613	3.94365	8.02497e-05	0.00302867	Conserved hypothetical protein.
Os11t0118300-01	20.0054	3.21981	-2.63534	5.10194	3.36194e-07	3.01992e-05	NPH3 domain containing protein.
Os09t0467200-01	46.0924	7.42067	-2.63491	4.90491	9.34685e-07	7.01751e-05	Similar to Glutathione S-transferase GST 23 (EC 2.5.1.18) (Fragment).
Os01t0206700-01	38.4802	6.19954	-2.63388	5.01056	5.42724e-07	4.48601e-05	Similar to Serine/threonine protein kinase (CBL-interacting protein kinase 20).
Os01t0237366-00	8.92522	1.43955	-2.63227	3.32073	0.000897809	0.0211746	NAD(P)-binding domain containing protein.
Os03t0624300-01	222.484	36.1408	-2.622	5.47315	4.42102e-08	5.295e-06	Hypothetical protein.
Os02t0262800-01	0.478595	0.077846	-2.62011	3.22639	0.00125363	0.0276065	Similar to NBS-LRR protein (Fragment).
Os06t0144200-01	17.9126	2.91441	-2.61969	4.82912	1.37137e-06	9.77504e-05	Similar to Pectate lyase homolog (EC 4.2.2.2).
Os09t0341600-01	1.79274	0.292121	-2.61753	3.29913	0.000969844	0.0225413	Cyclin-like F-box domain containing protein.
Os03t0102500-01	19.3631	3.16079	-2.61495	4.42618	9.59164e-06	0.000513777	Similar to Beta-expansin precursor (Fragment).
Os04t0657500-01	26.6116	4.34626	-2.61421	5.17966	2.22296e-07	2.10416e-05	Lipase, class 3 family protein.
Os01t0940700-02	101.106	16.5577	-2.6103	4.50864	6.52449e-06	0.000370549	Similar to Beta 1,3-glucanase.
Os03t0132900-01	26.25	4.29971	-2.61001	4.71104	2.46457e-06	0.000161606	Similar to Chitinase (EC 3.2.1.14) (Fragment).
Os06t0147200-01	3.47295	0.570203	-2.60661	3.01752	0.00254852	0.0474555	Conserved hypothetical protein.
Os02t0815100-01	1.7698	0.291484	-2.6021	3.12301	0.00179012	0.0362055	C2 membrane targeting protein domain containing protein.
Os06t0267900-01	1.55324	0.255874	-2.60177	3.7379	0.000185567	0.00609532	NB-ARC domain containing protein.
Os03t0593600-00	8.70407	1.43509	-2.60055	4.20178	2.64829e-05	0.00121106	Similar to Cytochrome P450 family protein, expressed.
Os04t0461000-01	8.32947	1.38026	-2.59329	4.07218	4.65746e-05	0.00192261	Similar to Myb-related transcription factor LBM1.
Os08t0529000-01	18.6708	3.09446	-2.59303	4.80389	1.5561e-06	0.000108933	Similar to Auxin efflux carrier component 1 (PIN-FORMED protein) (AtPIN1).
Os01t0888900-01	12.329	2.04438	-2.59232	3.60491	0.000312259	0.00930508	Conserved hypothetical protein.
Os10t0418100-01	3.57027	0.594696	-2.58581	3.59252	0.000327498	0.00965046	Similar to Calcium-transporting ATPase 8, plasma membrane-type (EC 3.6.3.8) (Ca(2+)-ATPase isoform 8).
Os01t0681700-00	3.2231	0.538103	-2.58249	3.02718	0.00246847	0.0463819	Hypothetical conserved gene.
Os03t0655400-01	2094.03	350.596	-2.5784	5.40905	6.33615e-08	7.1739e-06	Similar to LIP5.
Os01t0848900-01	3.86391	0.647702	-2.57666	3.52452	0.000424255	0.0118469	Conserved hypothetical protein.
Os08t0425700-01	3.56375	0.598168	-2.57477	3.40027	0.0006732	0.0168957	Similar to Annexin-like protein.
Os04t0191500-01	30.9613	5.2009	-2.57364	4.18634	2.83484e-05	0.00127975	Conserved hypothetical protein.
Os03t0663500-00	43.0454	7.25091	-2.56963	4.8024	1.56772e-06	0.000109529	Similar to Osmotin precursor.
Os02t0710500-01	9.65408	1.6288	-2.56733	4.23141	2.32234e-05	0.00108024	Similar to Receptor protein kinase.
Os02t0272300-01	28.7333	4.84909	-2.56694	5.39405	6.88866e-08	7.72495e-06	Similar to Pollen-specific kinase partner protein.
Os05t0586600-01	9.40695	1.59369	-2.56136	4.26343	2.01315e-05	0.000968404	Similar to SIGE (RNA polymerase sigma subunit E); DNA binding / DNA-directed RNA polymerase/ sigma factor/ transcription factor.
Os03t0574900-01	11.0346	1.86948	-2.56132	4.83458	1.33427e-06	9.54923e-05	Similar to Potassium transporter 1 (OsHAK1). Splice isoform 2.
Os08t0441200-01	20.5786	3.49433	-2.55805	3.05689	0.00223647	0.0429861	null
Os04t0282200-01	49.2889	8.38362	-2.55562	5.29861	1.16686e-07	1.22441e-05	Protein of unknown function DUF1685 family protein.
Os10t0524700-00	1.51874	0.258659	-2.55375	3.20795	0.00133684	0.0290214	Cytochrome P450 family protein.
Os01t0588900-01	86.9749	14.8506	-2.55008	5.43863	5.36914e-08	6.2602e-06	Conserved hypothetical protein CHP00730 domain containing protein.
Os07t0664000-00	3.31584	0.566238	-2.54989	3.18053	0.00147006	0.031266	Similar to Oxidoreductase, short chain dehydrogenase/reductase family protein, expressed.
Os01t0907200-00	5.18561	0.885904	-2.54929	3.30992	0.000933234	0.0218491	Ubiquitin domain containing protein.
Os03t0760300-01	4.35456	0.744018	-2.54912	3.5015	0.000462648	0.01264	Cytochrome P450 family protein.
Os02t0805300-01	2.93305	0.504502	-2.53947	3.16525	0.00154952	0.0324386	Similar to predicted protein.
Os07t0539100-02	5.07314	0.87842	-2.5299	3.88726	0.000101384	0.00369941	Glycoside hydrolase, family 17 protein.
Os11t0677400-01	72.0122	12.4795	-2.52869	5.50352	3.72276e-08	4.55159e-06	Pectinesterase inhibitor domain containing protein.
Os01t0944900-01	7.03264	1.21952	-2.52775	3.66834	0.000244133	0.00765487	Similar to Beta-1,3-glucanase precursor.
Os04t0652400-01	21.5773	3.75739	-2.52171	5.07521	3.87058e-07	3.39032e-05	Similar to Sulphate transporter protein.
Os09t0547500-01	1.93982	0.338649	-2.51806	3.01197	0.00259562	0.0482052	Similar to Lysine decarboxylase-like protein.
Os01t0757200-01	64.9404	11.354	-2.51591	5.49507	3.90565e-08	4.72597e-06	Similar to GA 2-oxidase 4.
Os09t0396900-01	48.708	8.52116	-2.51504	4.87947	1.06371e-06	7.8688e-05	Protein of unknown function DUF125, transmembrane family protein.
Os04t0445900-00	4.33948	0.760549	-2.51241	3.08894	0.00200875	0.0395373	Similar to OSIGBa0140O07.10 protein.
Os12t0114000-01	3.01551	0.528885	-2.51137	3.03871	0.00237591	0.0450758	Hypothetical protein.
Os03t0800000-02	23.6396	4.1481	-2.51068	4.35789	1.31322e-05	0.000668805	Similar to nitrate and chloride transporter.
Os04t0286300-01	1.29545	0.227326	-2.51062	3.33576	0.000850658	0.0203764	Serine/threonine protein kinase-related domain containing protein.
Os05t0390300-00	23.4588	4.12751	-2.50678	4.24835	2.15353e-05	0.00101649	Conserved hypothetical protein.
Os02t0787250-01	2.98227	0.525011	-2.50599	3.18689	0.0014381	0.030759	Conserved hypothetical protein.
Os07t0689600-01	5.52123	0.973504	-2.50373	3.76124	0.000169071	0.00564296	Nicotianamine synthase 3 (EC 2.5.1.43) (S-adenosyl-L-methionine:S- adenosyl-L-methionine:S-adenosyl-methionine 3-amino-3- carboxypropyltransferase 3) (OsNAS3).
Os12t0147800-01	50.8823	8.97183	-2.50369	4.93989	7.81676e-07	6.04932e-05	Similar to Phytosulfokines 5 precursor (Secretory protein SH27A).
Os02t0756800-01	22.5124	3.99051	-2.49607	3.85692	0.000114824	0.00408815	Phosphate-induced protein 1 conserved region family protein.
Os03t0760402-00	12.3268	2.18525	-2.49593	3.23439	0.00121904	0.0269938	Similar to Cytochrome P450 CYP81A17.
Os06t0356800-01	2.50528	0.444242	-2.49555	3.11713	0.00182619	0.0367661	Similar to Xylanase inhibitor protein I precursor.
Os05t0142100-01	27.4985	4.8784	-2.49487	3.99506	6.46771e-05	0.00251926	Conserved hypothetical protein.
Os04t0354200-00	2.88037	0.511126	-2.4945	3.67575	0.000237148	0.00748921	Similar to OSIGBa0092G14.5 protein.
Os10t0530400-01	21.4892	3.82011	-2.49192	4.32283	1.54042e-05	0.000767205	Similar to Glutathione-S-transferase Cla47.
Os01t0332800-02	5.40051	0.960237	-2.49163	3.56479	0.00036415	0.0105495	Similar to SCPL33.
Os03t0688300-01	2.08501	0.371479	-2.4887	3.40231	0.000668178	0.0167936	Similar to Calcium-dependent protein kinase.
Os10t0579800-01	12.9311	2.30769	-2.48632	3.92712	8.59686e-05	0.00320601	TGF-beta receptor, type I/II extracellular region family protein.
Os05t0356700-01	29.9407	5.36971	-2.47919	4.92902	8.26441e-07	6.35385e-05	Protein of unknown function DUF231, plant domain containing protein.
Os09t0425400-00	30.678	5.51582	-2.47556	3.43599	0.000590382	0.0152074
Os02t0122600-00	8.92726	1.607	-2.47385	3.53472	0.00040821	0.0114899	EF-Hand type domain containing protein.
Os07t0685600-01	1.49558	0.269347	-2.47317	3.21587	0.00130051	0.028408	Similar to predicted protein.
Os05t0537100-00	4.3809	0.789953	-2.47139	3.39165	0.000694727	0.0173126	WRKY transcription factor 10.
Os02t0240300-01	4.63183	0.837073	-2.46816	3.46851	0.000523351	0.0139186	Similar to Class III peroxidase GvPx2b (Fragment).
Os07t0122100-01	1.53829	0.278194	-2.46716	3.17373	0.00150496	0.0318083	Protein of unknown function DUF1719, Oryza sativa family protein.
Os12t0555500-01	1993.4	360.531	-2.46704	4.93998	7.81286e-07	6.04932e-05	Probenazole-inducible protein PBZ1.
Os02t0798200-01	21.1338	3.83523	-2.46217	4.30224	1.69083e-05	0.000836201	Zinc finger, RING/FYVE/PHD-type domain containing protein.
Os03t0388900-01	30.9579	5.62267	-2.46098	4.90122	9.52434e-07	7.10532e-05	Peptidase C14, caspase catalytic domain containing protein.
Os11t0184800-01	436.623	79.4581	-2.45812	5.35753	8.43682e-08	9.226e-06	Similar to Aspartic proteinase Asp1 precursor (EC 3.4.23.-) (OsAsp1) (Nucellin- like protein).
Os05t0555600-01	31.9033	5.81088	-2.45688	4.81815	1.44893e-06	0.00010245	Similar to NADH dependent Glutamate Synthase precursor (EC 1.4.1.14).
Os07t0539300-01	3.16952	0.577295	-2.45688	3.38184	0.00072001	0.0177916	Glycoside hydrolase, family 17 protein.
Os08t0138900-01	49.7196	9.06103	-2.45607	4.48898	7.15635e-06	0.00039935	Conserved hypothetical protein.
Os09t0572550-01	11.9384	2.17664	-2.45544	3.8085	0.000139811	0.0048265	Hypothetical gene.
Os02t0209300-01	73.6298	13.4509	-2.45259	4.52933	5.91706e-06	0.000343762	Hypothetical conserved gene.
Os02t0738200-01	1.54895	0.283796	-2.44836	3.06268	0.00219366	0.0422578	Zinc finger, RING/FYVE/PHD-type domain containing protein.
Os06t0216300-01	4.06843	0.749773	-2.43995	3.49265	0.000478255	0.0130142	Similar to 12-oxophytodienoic acid reductase.
Os01t0383700-01	19.9111	3.67159	-2.4391	5.25685	1.46547e-07	1.48709e-05	Conserved hypothetical protein.
Os03t0741050-01	3.7939	0.699679	-2.43892	3.92481	8.67972e-05	0.00323069	Non-protein coding transcript.
Os07t0510900-01	8.4991	1.56792	-2.43846	4.07729	4.55633e-05	0.00188972	Similar to L-ascorbate oxidase.
Os09t0455300-01	3.73929	0.690203	-2.43767	3.29945	0.000968759	0.022531	Similar to INDEHISCENT protein.
Os11t0444700-01	6.54414	1.21035	-2.43477	3.44495	0.000571173	0.0148429	Octicosapeptide/Phox/Bem1p domain containing protein.
Os10t0393800-01	4.46359	0.825626	-2.43464	3.52927	0.000416709	0.0116639	Lipase, GDSL domain containing protein.
Os01t0635600-00	5.58177	1.03579	-2.43	4.3606	1.29704e-05	0.000661905
Os09t0412700-01	42.652	7.93012	-2.4272	4.15745	3.21813e-05	0.00141823	Conserved hypothetical protein.
Os03t0183900-01	5.23858	0.974248	-2.42682	3.74891	0.000177605	0.00588873	Similar to Plasma membrane H+-ATPase.
Os02t0777800-01	5.49946	1.0229	-2.42662	3.98935	6.62558e-05	0.00256938	Similar to Avr9/Cf-9 induced kinase 1.
Os03t0663700-01	13.1686	2.45922	-2.42083	4.77176	1.82622e-06	0.000124622	Similar to Type I inositol-1,4,5-trisphosphate 5-phosphatase CVP2 (EC 3.1.3.56) (Cotyledon vascular pattern 2 protein).
Os04t0458950-00	21.5312	4.02846	-2.41813	4.67538	2.93404e-06	0.000187502	Hypothetical conserved gene.
Os04t0480700-01	2.22656	0.417203	-2.416	3.137	0.00170686	0.034943	Cytochrome P450 family protein.
Os01t0532300-01	10.543	1.97777	-2.41434	3.89709	9.73548e-05	0.00357835	Conserved hypothetical protein.
Os02t0532800-00	3.97888	0.747751	-2.41173	3.18274	0.00145887	0.0310766	7TM GPCR, rhodopsin-like domain containing protein.
Os04t0541700-01	12.297	2.32462	-2.40324	3.7329	0.000189285	0.00620011	Homeodomain-related domain containing protein.
Os01t0816100-01	25.9525	4.91366	-2.401	4.54958	5.37539e-06	0.000317282	Similar to NAC domain protein.
Os02t0166200-01	1.93574	0.366728	-2.4001	3.29628	0.000979731	0.0227262	Non-protein coding transcript.
Os05t0343400-01	35.28	6.70716	-2.39507	5.05813	4.23391e-07	3.65842e-05	WRKY transcription factor 53 (Transcription factor WRKY12).
Os08t0167800-01	0.971432	0.185301	-2.39024	3.22924	0.00124118	0.0273946	Similar to Terpene synthase 10.
Os05t0520600-01	2.57498	0.491416	-2.38954	3.08691	0.00202246	0.0397183	Conserved hypothetical protein.
Os10t0136500-01	8.07961	1.54341	-2.38816	4.15581	3.2414e-05	0.00142669	Similar to SRK5 protein (Fragment).
Os05t0106200-01	2.08712	0.399716	-2.38447	3.03486	0.0024065	0.0455333	Protein of unknown function DUF6, transmembrane domain containing protein.
Os08t0445700-01	14.5425	2.79316	-2.38031	4.70365	2.55553e-06	0.000166948	HAD-superfamily hydrolase subfamily IIB protein.
Os07t0646800-01	7.85757	1.5097	-2.37982	3.98936	6.62511e-05	0.00256938	Similar to Avr9/Cf-9 rapidly elicited protein 231.
Os01t0144300-01	14.163	2.73056	-2.37486	4.17848	2.93468e-05	0.00131222	Conserved hypothetical protein.
Os01t0548000-01	1.79881	0.348508	-2.36777	3.24892	0.00115846	0.025982	Conserved hypothetical protein.
Os06t0260000-01	2.83188	0.549469	-2.36565	3.50158	0.000462506	0.01264	Conserved hypothetical protein.
Os03t0726500-01	35.125	6.82334	-2.36395	5.01828	5.21359e-07	4.35026e-05	Protein of unknown function DUF81 domain containing protein.
Os04t0182200-01	59.2308	11.5388	-2.35986	5.05161	4.38113e-07	3.75349e-05	2OG-Fe(II) oxygenase domain containing protein.
Os08t0504800-01	9.83095	1.9153	-2.35976	3.94397	8.01427e-05	0.00302788	Conserved hypothetical protein.
Os07t0564500-01	7.66429	1.49941	-2.35376	3.98166	6.84369e-05	0.00264233	Pyridine nucleotide-disulphide oxidoreductase, NAD-binding region domain containing protein.
Os07t0418600-01	34.6693	6.79173	-2.35181	4.50443	6.65522e-06	0.00037495	Conserved hypothetical protein.
Os02t0228300-01	22.3281	4.3771	-2.35081	5.07195	3.93764e-07	3.4405e-05	Protein kinase, core domain containing protein.
Os01t0956300-01	7.06186	1.38604	-2.34908	3.29071	0.000999338	0.0230897	Conserved hypothetical protein.
Os06t0604300-01	3.21887	0.634742	-2.34231	3.65612	0.000256065	0.0079511	Phospholipase D.
Os06t0126100-01	12.6437	2.49842	-2.33933	4.70688	2.51542e-06	0.000164634	ABC transporter, conserved site domain containing protein.
Os10t0497700-01	4.47609	0.886362	-2.33627	3.4544	0.000551513	0.0144232	Similar to Phytochelatin synthetase.
Os03t0772600-01	15.3388	3.04124	-2.33446	4.49557	6.93828e-06	0.000388411	Similar to Lectin-like receptor kinase 7;2.
Os03t0734300-01	32.0542	6.36658	-2.33192	3.56424	0.000364911	0.0105495	Similar to Proteinase inhibitor type II CEVI57 precursor.
Os10t0528100-01	5.98474	1.19643	-2.32256	3.32625	0.000880229	0.0208859	Similar to Glutathione S-transferase GST 42 (EC 2.5.1.18) (Fragment).
Os11t0523700-01	2.5336	0.508727	-2.31623	3.25823	0.00112108	0.0253049	Similar to Transcription factor ICE1 (Inducer of CBF expression 1) (Basic helix- loop-helix protein 116) (bHLH116) (AtbHLH116).
Os11t0226933-01	3.99943	0.803754	-2.31497	3.53873	0.000402054	0.0113529	NB-ARC domain containing protein.
Os07t0538200-01	3.67691	0.740953	-2.31104	3.59166	0.000328574	0.00967369	Serine/threonine protein kinase-related domain containing protein.
Os01t0382400-01	102.587	20.6996	-2.30917	4.81511	1.47121e-06	0.000103609	Similar to Pathogenesis-related protein PRB1-2 precursor.
Os08t0384500-01	5.57172	1.12653	-2.30623	3.61838	0.000296451	0.00893607	Similar to PDR-like ABC transporter (PDR3 ABC transporter).
Os02t0536500-01	341.101	69.0504	-2.30448	5.2223	1.76715e-07	1.73812e-05	Conserved hypothetical protein.
Os06t0219500-00	8.59204	1.73934	-2.30446	3.24058	0.00119286	0.0265674	Similar to Heat shock 22 kDa protein, mitochondrial precursor.
Os05t0347400-01	3.79254	0.768098	-2.3038	3.16804	0.0015347	0.0322308	Protein of unknown function DUF640 domain containing protein.
Os03t0102700-01	7.43638	1.50819	-2.30178	3.40155	0.000670049	0.0168286	Similar to Expansin-B7.
Os12t0629700-01	19.0652	3.86715	-2.3016	3.76031	0.0001697	0.00565859	Similar to Thaumatin-like protein precursor.
Os11t0700500-01	14.5019	2.95087	-2.29703	3.93642	8.27074e-05	0.00310195	Similar to Snapdragon myb protein 305 homolog.
Os04t0607500-01	6.23643	1.27125	-2.29448	3.01982	0.00252926	0.0472469	Oryza sativa high-affinity K+ transporter (HKT) 1;1., Sodium ion transport., Ion transporter.
Os04t0149400-01	67.3842	13.7521	-2.29276	3.73493	0.000187768	0.00615614	Hypothetical protein.
Os11t0512800-01	151.66	30.9524	-2.29272	4.98305	6.25904e-07	5.02857e-05	Conserved hypothetical protein.
Os07t0283125-00	2.45462	0.500978	-2.29268	3.23511	0.00121596	0.0269578	Similar to lectin-like receptor kinase 7.
Os02t0801600-00	188.547	38.5462	-2.29026	4.99854	5.77664e-07	4.71942e-05	Hypothetical conserved gene.
Os10t0450800-02	129.103	26.4174	-2.28896	4.91512	8.87277e-07	6.73336e-05	Glycine-rich cell wall structural protein 2 precursor.
Os07t0129200-01	69.6341	14.2646	-2.28736	4.38165	1.17783e-05	0.000609907	Similar to Pathogenesis-related protein PR1a.
Os05t0530400-01	2.28676	0.468839	-2.28614	3.16872	0.00153112	0.0322065	Heat stress transcription factor Spl7 (Heat shock transcription factor) (Heat shock factor RHSF10).
Os04t0399300-01	2.38614	0.491952	-2.27809	3.05573	0.00224511	0.0431287	Similar to Nudix hydrolase 13, mitochondrial precursor (EC 3.6.1.-) (AtNUDT13).
Os02t0584700-01	10.6575	2.21045	-2.26946	3.18892	0.00142806	0.0306056	Heavy metal transport/detoxification protein domain containing protein.
Os05t0208550-00	6.57346	1.366	-2.2667	3.10816	0.00188254	0.0375782	Similar to gibberellin 2-beta-dioxygenase.
Os04t0103900-01	2.92609	0.609323	-2.26369	3.18378	0.00145364	0.0310215	Similar to Chalcone synthase.
Os05t0405000-02	96.2093	20.0465	-2.26283	3.95247	7.73482e-05	0.00293806	Similar to Isoform 2 of Pyruvate, phosphate dikinase 1, chloroplastic.
Os01t0628700-01	13.5689	2.83103	-2.2609	4.26931	1.96076e-05	0.000947081	Cytochrome P450.
Os08t0247600-01	1.35429	0.283453	-2.25636	3.15682	0.001595	0.0330956	Leucine-rich repeat, N-terminal domain containing protein.
Os02t0651900-01	31.2085	6.54291	-2.25393	4.19277	2.75569e-05	0.00124882	Conserved hypothetical protein.
Os07t0586100-01	5.20105	1.09063	-2.25364	3.3784	0.000729086	0.017978	Similar to Esterase precursor (EC 3.1.1.-) (Early nodule-specific protein homolog) (Latex allergen Hev b 13).
Os05t0200400-01	3.84624	0.809011	-2.24922	3.06274	0.00219318	0.0422578	Similar to Cytochrome P450 CYP90D10.b.
Os03t0830800-01	6.83138	1.43892	-2.24719	3.00892	0.00262178	0.0486141	Pectinesterase inhibitor domain containing protein.
Os02t0569400-02	7.07158	1.49063	-2.24611	3.24964	0.0011555	0.0259486	Similar to Cyt-P450 monooxygenase.
Os03t0388800-01	85.2816	18.0091	-2.24351	4.9649	6.87348e-07	5.45111e-05	Similar to Hydrolase.
Os02t0188500-01	9.89471	2.09221	-2.24163	3.61372	0.000301836	0.00904531	Ubiquitin domain containing protein.
Os07t0142900-01	174.715	36.9782	-2.24026	5.08839	3.61114e-07	3.17329e-05	Aldo/keto reductase family protein.
Os10t0568900-01	16.9925	3.6016	-2.23819	4.21832	2.46131e-05	0.00113291	Haloacid dehalogenase-like hydrolase domain containing protein.
Os07t0525400-01	31.4857	6.67861	-2.23708	4.75564	1.97818e-06	0.000133953	RabGAP/TBC domain containing protein.
Os05t0198000-01	13.0312	2.77043	-2.23379	3.25258	0.00114363	0.0257314	Hypothetical protein.
Os01t0716500-01	37.1795	7.90833	-2.23306	4.32629	1.51643e-05	0.000758475	Methyltransferase type 12 domain containing protein.
Os04t0422600-01	32.7448	6.99129	-2.22763	4.65714	3.20635e-06	0.000203427	Protein of unknown function DUF6, transmembrane domain containing protein.
Os03t0299600-01	94.8093	20.3033	-2.22331	4.91634	8.81764e-07	6.72049e-05	Wound-induced protein, Wun1 domain containing protein.
Os06t0593800-01	13.3285	2.85469	-2.22311	4.03895	5.36916e-05	0.00215575	UDP-glucuronosyl/UDP-glucosyltransferase family protein.
Os10t0535800-01	4.53536	0.972106	-2.22203	3.01541	0.00256628	0.0477106	Protein of unknown function Cys-rich domain containing protein.
Os05t0576600-01	12.1927	2.61811	-2.21943	3.5021	0.000461599	0.01264	Conserved hypothetical protein.
Os01t0808400-01	79.7715	17.1647	-2.21643	5.00052	5.71763e-07	4.69299e-05	Similar to Calcium-dependent protein kinase (Fragment).
Os02t0214400-01	28.4341	6.14267	-2.21068	4.56695	4.94865e-06	0.000293848	Similar to Pectate lyase homolog (EC 4.2.2.2) (Fragment).
Os11t0136600-00	11.4728	2.48	-2.20981	4.03746	5.40324e-05	0.00216264	Similar to Calcium-dependent protein kinase (Fragment).
Os04t0532400-01	3.72641	0.807331	-2.20656	3.00602	0.0026469	0.0489509	Similar to OSIGBa0125M19.13 protein.
Os04t0115700-02	4.73334	1.02978	-2.20052	3.21028	0.00132608	0.028859	Hypothetical protein.
Os03t0687700-01	9.24157	2.0233	-2.19143	3.29863	0.000971589	0.022567	Ribosome-inactivating protein domain containing protein.
Os07t0418700-01	28.5715	6.25845	-2.1907	4.14951	3.33181e-05	0.00145739	Conserved hypothetical protein.
Os10t0330400-01	7.46794	1.63833	-2.18848	3.3291	0.000871282	0.0207435	Protein of unknown function DUF179 family protein.
Os04t0496950-01	17.039	3.75778	-2.18089	4.47637	7.59212e-06	0.000419018	Non-protein coding transcript.
Os03t0594900-01	13.7358	3.03094	-2.1801	4.03896	5.3689e-05	0.00215575	Cytochrome P450 family protein.
Os06t0181500-02	6.97497	1.54656	-2.17313	3.43815	0.000585702	0.0151091	Similar to Plasma membrane H+-ATPase.
Os01t0638000-01	4.836	1.07231	-2.17309	3.42082	0.000624326	0.015876	UDP-glucuronosyl/UDP-glucosyltransferase family protein.
Os02t0321600-01	15.8331	3.51763	-2.17027	3.47427	0.00051224	0.0137372	Conserved hypothetical protein.
Os07t0578300-01	251.435	56.565	-2.1522	4.67091	2.99872e-06	0.000190597	Peptidase S8, subtilisin-related domain containing protein.
Os02t0559800-01	5.19251	1.16893	-2.15125	3.16019	0.00157668	0.032812	E3 ubiquitin ligase EL5 (EC 6.3.2.-).
Os02t0579000-01	22.5226	5.07431	-2.15009	4.08249	4.45549e-05	0.00185226	No apical meristem (NAM) protein domain containing protein.
Os11t0454300-01	14.3037	3.22371	-2.1496	3.28288	0.00102752	0.0236015	Similar to Water-stress inducible protein RAB21.
Os02t0686100-00	21.1527	4.77544	-2.14713	3.85735	0.000114623	0.00408514	Similar to RING-H2 finger protein ATL1B.
Os06t0472900-01	8.39886	1.89633	-2.14698	3.50518	0.000456301	0.012533	Haem peroxidase family protein.
Os01t0217500-01	3.46878	0.786805	-2.14035	3.03635	0.00239457	0.0453565	ThiJ/PfpI domain containing protein.
Os07t0190000-01	24.5523	5.57065	-2.13994	4.62307	3.78104e-06	0.000237323	Similar to 1-deoxy-D-xylulose 5-phosphate synthase 2 precursor.
Os04t0540900-01	12.6346	2.87301	-2.13675	3.79109	0.000149986	0.00510273	Serine/threonine protein kinase domain containing protein.
Os01t0759200-02	13.1946	3.01795	-2.12831	3.87738	0.000105588	0.0038133	Similar to PnC401 homologue.
Os02t0175700-01	41.8007	9.56151	-2.12821	4.67127	2.99345e-06	0.000190597	Epsin-like, N-terminal domain containing protein.
Os07t0628700-01	26.0579	5.99702	-2.1194	4.51293	6.39389e-06	0.000363718	Similar to Receptor protein kinase.
Os04t0493400-01	391.136	90.6965	-2.10855	4.74352	2.10038e-06	0.000141412	Similar to Chitinase.
Os06t0554600-00	15.8692	3.69118	-2.10408	3.73168	0.000190206	0.00621611	Conserved hypothetical protein.
Os01t0940000-01	3.87337	0.901165	-2.10373	3.32944	0.0008702	0.0207317	FAD linked oxidase, N-terminal domain containing protein.
Os04t0228400-01	27.8975	6.49932	-2.10178	4.02874	5.60761e-05	0.00223618	Expansin precursor (Alpha-expansin OsEXPA1).
Os02t0758000-01	77.1939	18.0916	-2.09317	4.54745	5.42996e-06	0.000319732	Similar to Low molecular weight heat shock protein precursor (Mitochondrial small heat shock protein 22).
Os06t0203600-01	44.1887	10.3586	-2.09284	4.17615	2.96481e-05	0.00132315	Chalcone isomerase domain containing protein.
Os07t0446000-01	155.939	36.5624	-2.09255	4.57764	4.70247e-06	0.000283933	PAK-box/P21-Rho-binding domain containing protein.
Os02t0160500-01	1000.16	234.701	-2.09134	4.63067	3.64481e-06	0.000230002	Hypothetical conserved gene.
Os03t0229500-00	3.91043	0.92019	-2.08733	3.21522	0.00130344	0.0284542	Similar to antiporter/ drug transporter/ transporter.
Os11t0570000-01	10.0743	2.3714	-2.08687	4.18575	2.8423e-05	0.00128147	Similar to Receptor kinase-like protein.
Os02t0134700-00	69.5608	16.5259	-2.07354	3.44302	0.000575256	0.014927	Hypothetical conserved gene.
Os09t0452900-01	19.3756	4.6409	-2.06177	4.0374	5.40475e-05	0.00216264	Glycosyl transferase, family 31 protein.
Os04t0527400-02	74.4388	17.8921	-2.05673	3.95615	7.61679e-05	0.00290262	BRO1 domain containing protein.
Os11t0444900-01	27.5025	6.6368	-2.051	3.84653	0.000119801	0.00423962	Octicosapeptide/Phox/Bem1p domain containing protein.
Os01t0504500-02	3.91487	0.95013	-2.04277	3.06518	0.00217542	0.0419961	Multi antimicrobial extrusion protein MatE family protein.
Os04t0557200-01	2.91713	0.708348	-2.04202	3.00109	0.00269018	0.0495173	Similar to Anthocyanin regulatory B protein (Fragment).
Os03t0161200-01	83.7718	20.4779	-2.0324	4.4137	1.0162e-05	0.000537737	Similar to Sulfate transporter 3.1 (AST12) (AtST1).
Os04t0688300-01	14.3641	3.52138	-2.02825	3.56886	0.000358538	0.0104165	Haem peroxidase, plant/fungal/bacterial family protein.
Os01t0660200-01	137.438	33.7381	-2.02633	4.60678	4.08951e-06	0.000253075	Acidic class III chitinase OsChib3a precursor (Chitinase) (EC 3.2.1.14).
Os06t0567200-01	10.5222	2.58388	-2.02583	3.7301	0.0001914	0.00624035	Cupredoxin domain containing protein.
Os01t0175600-01	67.5035	16.6106	-2.02286	4.57494	4.76355e-06	0.000285398	Bicarbonate transporter, eukaryotic domain containing protein.
Os09t0427125-00	20.4469	5.03933	-2.02058	3.08434	0.00204005	0.0398857	Hypothetical conserved gene.
Os03t0290300-01	116.63	28.7666	-2.01947	4.5009	6.76667e-06	0.000380013	Similar to W-3 fatty acid desaturase (Fragment).
Os08t0444500-00	21.8235	5.38735	-2.01824	3.3873	0.000705842	0.0175276	Conserved hypothetical protein.
Os01t0314800-01	215.722	53.4441	-2.01307	4.43932	9.02433e-06	0.000488869	Late embryogenesis abundant protein 3 family protein.
Os08t0466200-01	17.1791	4.26553	-2.00986	4.15297	3.28195e-05	0.00143736	Similar to KUP-related potassium transporter.
Os03t0159100-01	39.9005	9.92204	-2.0077	4.25863	2.05684e-05	0.000982706	Similar to Protein kinase APK1B, chloroplast precursor (EC 2.7.1.-).
Os02t0675700-01	2.52437	10.1282	2.00438	-3.74993	0.000176882	0.00587582	Protein of unknown function DUF248, methyltransferase putative family protein.
Os06t0234600-01	3.23643	12.9954	2.00553	-3.64606	0.000266293	0.0082036	Protein of unknown function DUF231, plant domain containing protein.
Os03t0283400-01	8.09999	32.678	2.01233	-4.09519	4.21826e-05	0.00177459	Conserved hypothetical protein.
Os05t0427200-01	4.54843	18.3557	2.01279	-3.4151	0.000637585	0.016163	Glycosyl transferase, family 31 protein.
Os06t0475800-00	31.7021	127.973	2.01319	-3.87474	0.000106738	0.003843	Hypothetical conserved gene.
Os10t0482900-01	1.57752	6.36818	2.01322	-3.56136	0.000368942	0.0106051	Thioredoxin fold domain containing protein.
Os08t0489800-01	3.30675	13.4075	2.01955	-4.04948	5.13324e-05	0.00208	Phosphatidylinositol 3- and 4-kinase, catalytic domain containing protein.
Os12t0108100-01	12.1955	49.7342	2.0279	-4.57735	4.7091e-06	0.000283933	Similar to Ser Thr specific protein kinase-like protein.
Os09t0533900-01	28.5574	116.625	2.02994	-4.62681	3.71337e-06	0.000233492	Similar to CEL5
Os01t0195400-00	66.6841	273.462	2.03592	-4.60964	4.03372e-06	0.000250503	Harpin-induced 1 domain containing protein.
Os01t0839200-01	1.48547	6.09276	2.03618	-3.17053	0.00152161	0.0320447	Protein of unknown function DUF966 family protein.
Os01t0232100-01	25.0627	102.808	2.03634	-4.41306	1.01918e-05	0.000537737	Similar to Tonoplast membrane integral protein ZmTIP4-3.
Os11t0198200-01	4.03158	16.5568	2.03801	-3.80662	0.000140877	0.00484922	Conserved hypothetical protein.
Os11t0461000-01	3.85781	15.8482	2.03847	-3.70748	0.000209328	0.00672525	Peptidase S10, serine carboxypeptidase family protein.
Os02t0718600-01	66.2685	272.258	2.03858	-4.53193	5.84468e-06	0.000341768	Conserved hypothetical protein.
Os11t0112400-01	129.323	531.737	2.03974	-4.45686	8.31697e-06	0.000454747	Peroxidase (EC 1.11.1.7).
Os01t0263300-01	4.19703	17.3685	2.04904	-3.75473	0.000173526	0.00577523	Similar to Peroxidase 72 precursor (EC 1.11.1.7) (Atperox P72) (PRXR8) (ATP6a).
Os03t0287800-00	3.48981	14.463	2.05115	-3.80968	0.000139149	0.00480836	Glycosyl transferase, family 43 protein.
Os06t0680700-01	2.20704	9.16408	2.05387	-3.66362	0.000248678	0.00779032	Cytochrome P450 family protein.
Os01t0119000-01	1.16473	4.83976	2.05495	-3.22895	0.00124245	0.0273946	Glycosyltransferase AER61, uncharacterized domain containing protein.
Os01t0733500-01	8.75893	36.4775	2.05818	-4.3577	1.31436e-05	0.000668805	Similar to Dehydration-induced protein RD22-like protein 1.
Os04t0474700-01	1.15565	4.83185	2.06387	-3.28525	0.00101893	0.0234808	Similar to OSIGBa0135C13.6 protein.
Os08t0298700-01	1.89278	7.92076	2.06514	-3.51643	0.000437395	0.0120702	Similar to male sterility protein 2.
Os06t0684500-01	4.61349	19.3479	2.06824	-3.83912	0.000123477	0.00436094	Conserved hypothetical protein.
Os10t0149400-00	6.9236	29.0525	2.06907	-3.59057	0.000329957	0.00970631	Protein of unknown function DUF1210 family protein.
Os10t0477600-01	2.97381	12.4828	2.06955	-3.67062	0.000241966	0.00760045	Similar to NAM / CUC2-like protein.
Os05t0399400-00	4.7201	19.8663	2.07343	-3.7697	0.000163442	0.00547584	Similar to Endochitinase precursor (EC 3.2.1.14).
Os02t0549200-01	3.49217	14.7246	2.07603	-4.03057	5.56409e-05	0.00222387	Similar to Ser Thr specific protein kinase-like protein.
Os07t0282300-01	3.246	13.7149	2.07902	-4.22162	2.42549e-05	0.00112377	Similar to Aldehyde oxidase 1 homolog (Fragment).
Os03t0826500-01	16.0549	67.9782	2.08206	-4.72652	2.28399e-06	0.000152607	Anthranilate synthase alpha 1 subunit.
Os01t0260100-01	1.46525	6.21774	2.08525	-3.87877	0.000104986	0.00380327	Similar to Kinesin heavy chain (Fragment).
Os01t0739400-01	20.3133	86.2428	2.08598	-3.74081	0.00018343	0.00603882	Similar to predicted protein.
Os12t0288000-02	8.93717	38.0492	2.08997	-3.32807	0.000874499	0.0207779	Protein of unknown function DUF6, transmembrane domain containing protein.
Os08t0547500-02	8.16809	35.2393	2.10912	-3.01904	0.00253573	0.0472674	Hypothetical conserved gene.
Os01t0659900-01	1.80394	7.80176	2.11265	-3.66316	0.00024912	0.00779041	Cyclin-like F-box domain containing protein.
Os05t0319700-01	1.35435	5.85752	2.11269	-3.43483	0.000592916	0.0152504	Similar to Protein kinase-like protein (Fragment).
Os08t0546100-00	23.4537	101.649	2.11571	-4.77597	1.78846e-06	0.00012252	Similar to protein binding protein.
Os02t0158500-00	2.30477	9.99546	2.11665	-3.44215	0.000577111	0.0149641	Uncharacterized plant-specific domain 01627 containing protein.
Os01t0702700-01	4.88937	21.2299	2.11838	-4.11266	3.91122e-05	0.00166733	Similar to Transcription factor MYB86 (Myb-related protein 86) (AtMYB86) (Myb homolog 4) (AtMyb4).
Os01t0974100-01	6.08758	26.4556	2.11963	-3.70836	0.000208605	0.00670811	Similar to Amino acid selective channel protein.
Os03t0799200-01	0.724852	3.17069	2.12904	-3.36797	0.000757244	0.0185296	Protein of unknown function DUF593 family protein.
Os07t0565800-01	35.6497	156.051	2.13005	-4.64253	3.44161e-06	0.000217569	Conserved hypothetical protein.
Os01t0149200-01	0.631845	2.76726	2.13081	-3.4828	0.000496193	0.0133885	Hypothetical gene.
Os08t0390100-01	1.08796	4.7971	2.14054	-3.8272	0.000129612	0.0045457	Similar to predicted protein.
Os06t0506200-01	4.31359	19.0222	2.14073	-3.25864	0.00111946	0.0252844	Protein of unknown function DUF250 domain containing protein.
Os12t0225900-01	21.6159	95.3436	2.14104	-4.80631	1.5374e-06	0.000107838	Allyl alcohol dehydrogenase.
Os05t0223200-01	3.74137	16.5245	2.14297	-3.45359	0.000553175	0.0144412	Similar to Glycine-rich RNA-binding protein GRP2A.
Os08t0326700-00	11.9177	52.7197	2.14523	-4.83614	1.32385e-06	9.51334e-05	Similar to subtilisin-like protease.
Os03t0111200-01	50.4983	223.923	2.1487	-4.89603	9.77906e-07	7.27992e-05	Similar to Remorin.
Os09t0482780-01	10.2982	45.7149	2.15027	-4.23448	2.29083e-05	0.00106699	FAS1 domain domain containing protein.
Os04t0311400-01	14.2004	63.2314	2.15471	-4.00543	6.19053e-05	0.00243011	Similar to Cysteine proteinase 1 precursor (EC 3.4.22.-).
Os01t0281600-01	6.69325	29.934	2.16101	-4.1306	3.61813e-05	0.00155748	Cupredoxin domain containing protein.
Os07t0237200-00	2.57533	11.6178	2.17351	-3.0182	0.00254281	0.0473743	Hypothetical conserved gene.
Os05t0399700-01	334.36	1516.15	2.18093	-4.11897	3.80565e-05	0.00163023	Chitinase (EC 3.2.1.14).
Os08t0557800-01	5.39138	24.5928	2.18951	-4.5196	6.1957e-06	0.000356475	Similar to Fatty acyl coA reductase.
Os07t0434200-01	0.284946	1.30242	2.19243	-3.16377	0.00155739	0.0325647	Integrase, catalytic core domain containing protein.
Os03t0401300-01	38.3295	175.316	2.19343	-3.35796	0.000785204	0.0190549	Sucrose synthase 2 (EC 2.4.1.13) (Sucrose-UDP glucosyltransferase 2).
Os08t0496700-00	4.18282	19.1634	2.1958	-4.32766	1.50704e-05	0.000754851
Os08t0401500-01	1.82078	8.34507	2.19637	-3.78781	0.000151981	0.00515068	Similar to HOTHEAD protein precursor (ADHESION OF CALYX EDGES protein).
Os04t0445700-02	5.0455	23.1389	2.19725	-3.63993	0.000272707	0.00835733	Similar to 3-oxoacyl-[acyl-carrier-protein] synthase I, chloroplast precursor (EC 2.3.1.41) (Beta-ketoacyl-ACP synthase I) (KAS I).
Os02t0720900-01	9.62707	44.1575	2.19749	-4.23582	2.27718e-05	0.00106204	Peptidase A1 domain containing protein.
Os03t0721300-01	5.46572	25.177	2.20362	-4.603	4.16452e-06	0.000256814	Protein of unknown function DUF946, plant family protein.
Os07t0489800-01	34.8042	162.593	2.22393	-4.9914	5.99427e-07	4.8722e-05	Beta-grasp fold, ferredoxin-type domain containing protein.
Os05t0344400-01	3.31995	15.522	2.22508	-3.73132	0.00019048	0.00621611	Uncharacterised protein family UPF0497, trans-membrane plant domain containing protein.
Os04t0203900-00	2.90655	13.6124	2.22754	-3.89415	9.85438e-05	0.00361451	Zinc finger, CCHC-type domain containing protein.
Os06t0318500-00	0.525761	2.47045	2.2323	-3.05403	0.00225791	0.0433003	Similar to Sodium/hydrogen exchanger.
Os02t0765400-00	1.22223	5.76632	2.23814	-3.47567	0.00050957	0.0136865	Similar to Alpha-amylase precursor (EC 3.2.1.1) (1,4-alpha-D-glucan glucanohydrolase) (Isozyme 1B).
Os08t0390200-01	0.538415	2.54984	2.24362	-3.00982	0.00261406	0.0484965	Similar to 2-oxoglutarate-dependent oxygenase.
Os04t0402200-00	2.50718	11.978	2.25624	-4.25374	2.10232e-05	0.000999011	Hypothetical conserved gene.
Os12t0112000-01	116.695	557.791	2.25698	-4.87257	1.10156e-06	8.1147e-05	Similar to Peroxidase precursor (EC 1.11.1.7) (Fragment).
Os07t0489500-00	7.50093	35.9544	2.26103	-3.50231	0.000461237	0.01264	Ubiquitin domain containing protein.
Os08t0510300-01	2.56276	12.2863	2.26129	-4.42116	9.81741e-06	0.000522981	Potassium uptake protein, kup domain containing protein.
Os01t0523401-00	17.6239	84.7748	2.2661	-3.80491	0.000141854	0.00487788	Similar to ribosomal protein S18.
Os04t0182300-00	0.893155	4.2981	2.26672	-3.60092	0.000317089	0.00939054	Similar to OSIGBa0101K10.5 protein.
Os05t0576900-01	0.415484	2.00006	2.26718	-3.17679	0.00148916	0.0315501	Similar to PIN1-like auxin transport protein.
Os01t0216300-01	0.541967	2.6136	2.26976	-3.14302	0.00167216	0.0344128	Lipase, GDSL domain containing protein.
Os09t0333600-01	5.08144	24.5464	2.2722	-4.22092	2.43309e-05	0.00112433	Similar to PDR-like ABC transporter (PDR4 ABC transporter).
Os06t0523300-01	37.1712	180.084	2.27642	-4.84273	1.28069e-06	9.25989e-05	Conserved hypothetical protein.
Os11t0592600-01	31.2107	151.266	2.27697	-5.16771	2.36984e-07	2.21933e-05	Targeting for Xklp2 family protein.
Os03t0226200-01	1.12945	5.49816	2.28333	-3.0265	0.00247404	0.0464123	Non-symbiotic hemoglobin 2 (rHb2) (ORYsa GLB1b).
Os03t0149700-00	1.43384	6.98589	2.28456	-3.49122	0.00048082	0.0130739	Zinc finger, RING/FYVE/PHD-type domain containing protein.
Os10t0351700-01	26.7327	131.031	2.29323	-5.20451	1.94507e-07	1.8947e-05	Similar to Tapetum specific protein (Tapetum-specific endoxylanase).
Os10t0467800-01	15.0835	74.3469	2.3013	-3.36985	0.000752094	0.018442	Similar to Cellulose synthase (Fragment).
Os10t0494300-01	5.33756	26.5328	2.31353	-4.92296	8.5243e-07	6.51931e-05	Similar to ABC transporter.
Os06t0683700-01	13.5059	67.5035	2.32138	-4.44901	8.62664e-06	0.000468983	Conserved hypothetical protein.
Os09t0274900-01	19.8156	99.4158	2.32684	-4.61925	3.85127e-06	0.000240019	Conserved hypothetical protein.
Os02t0125400-01	1.93801	9.78433	2.3359	-3.62127	0.000293165	0.0088609	Negative regulatory factor PREG domain containing protein.
Os12t0288000-03	7.60364	38.5017	2.34016	-3.48489	0.000492341	0.0133356	Similar to Integral membrane protein DUF6 containing protein, expressed.
Os01t0716200-01	6.16	31.1957	2.34035	-4.34807	1.37339e-05	0.000696826	IQ calmodulin-binding region domain containing protein.
Os03t0258900-01	2.76357	14.0654	2.34755	-4.36526	1.26973e-05	0.000652699	Galactose oxidase, beta-propeller domain containing protein.
Os09t0476800-01	2.83251	14.4545	2.35137	-3.90633	9.37089e-05	0.00345155	FAS1 domain domain containing protein.
Os03t0826800-01	10.3557	53.0119	2.35589	-4.73199	2.22325e-06	0.000149114	Conserved hypothetical protein.
Os03t0675300-01	0.802584	4.12455	2.36151	-3.46436	0.000531505	0.0140425	Hypothetical conserved gene.
Os07t0687100-01	4.45204	22.9763	2.36761	-4.00352	6.24082e-05	0.00244169	Protein of unknown function DUF341 family protein.
Os06t0634500-01	5.27869	27.2499	2.368	-5.09538	3.48047e-07	3.10264e-05	Similar to Leucine-rich repeat transmembrane protein kinase 1 (Fragment).
Os04t0229100-01	5.47805	28.331	2.37065	-4.57914	4.66896e-06	0.00028248	Similar to Sinapyl alcohol dehydrogenase.
Os01t0672100-02	9.53032	49.3022	2.37106	-5.04099	4.63136e-07	3.93912e-05	No apical meristem (NAM) protein domain containing protein.
Os01t0932500-01	0.238313	1.23478	2.37332	-3.07503	0.00210478	0.0408565	Potassium uptake protein, kup domain containing protein.
Os09t0530200-01	1.86615	9.67106	2.37361	-4.0027	6.26226e-05	0.00244736	Similar to Endo-beta-1,4-glucanase precursor (EC 3.2.1.4).
Os01t0825000-01	1.23723	6.43536	2.37891	-3.48508	0.000491992	0.0133356	Similar to LOB domain protein 12.
Os05t0165200-00	1.07812	5.61343	2.38036	-3.22451	0.00126187	0.0277013	Similar to predicted protein.
Os04t0401100-01	5.52641	28.8505	2.38418	-4.30831	1.64503e-05	0.000815842	TonB box, conserved site domain containing protein.
Os06t0564100-01	0.990446	5.20333	2.39329	-3.09416	0.00197371	0.0390221	Conserved hypothetical protein.
Os01t0857600-01	1.3338	7.04584	2.40123	-4.06029	4.90114e-05	0.00199976	Conserved hypothetical protein.
Os02t0767300-01	3.15451	16.664	2.40125	-4.20053	2.66288e-05	0.00121458	Similar to Flavonol synthase/flavanone 3-hydroxylase (EC 1.14.11.23) (EC 1.14.11.9) (FLS) (CitFLS).
Os09t0376700-00	1.05811	5.62328	2.40993	-3.56307	0.000366539	0.0105878	Zinc finger, RING/FYVE/PHD-type domain containing protein.
Os05t0169300-01	2.16195	11.4906	2.41005	-3.77176	0.000162102	0.00544132	Pyridoxal phosphate-dependent transferase, major region, subdomain 1 domain containing protein.
Os03t0167400-00	1.06921	5.68779	2.41133	-3.44142	0.000578672	0.0149935	Protein of unknown function DUF620 family protein.
Os10t0140300-01	0.896961	4.77901	2.4136	-3.43607	0.000590229	0.0152074	Esterase, SGNH hydrolase-type domain containing protein.
Os07t0424400-01	18.2922	97.4675	2.41369	-3.70969	0.000207517	0.00668363	Similar to Cellulose synthase-7.
Os03t0294800-01	3.46608	18.4993	2.4161	-4.69728	2.63643e-06	0.000171299	Similar to Ser-thr protein kinase (Fragment).
Os05t0134400-02	23.9246	127.711	2.41632	-4.22511	2.38819e-05	0.00110794	Similar to peroxidase 1.
Os10t0554900-01	11.6152	62.4576	2.42686	-5.34951	8.8194e-08	9.52603e-06	Protein of unknown function DUF566 family protein.
Os01t0329900-01	8.51999	46.1714	2.43808	-5.22725	1.7205e-07	1.70654e-05	Similar to Lipase homolog (Fragment).
Os09t0526700-01	22.6626	122.837	2.43836	-5.48882	4.04637e-08	4.86283e-06	Similar to UDP-glucose 4-epimerase (EC 5.1.3.2) (Galactowaldenase) (UDP-galactose 4-epimerase).
Os01t0750300-01	25.9007	140.725	2.44182	-3.30007	0.00096659	0.0225252	Similar to Cellulose synthase (Fragment).
Os01t0319400-01	0.367102	2.00451	2.449	-3.2699	0.00107585	0.024488	Protein of unknown function DUF247, plant family protein.
Os04t0561500-02	2.02336	11.0498	2.4492	-4.59125	4.40605e-06	0.00026935	Similar to Prolyl endopeptidase (EC 3.4.21.26) (Post-proline cleaving enzyme) (PE).
Os08t0151300-01	6.5986	36.0709	2.4506	-5.09061	3.56915e-07	3.15771e-05	Myb transcription factor domain containing protein.
Os01t0758300-01	3.46688	19.0515	2.4582	-4.04772	5.17196e-05	0.00208847	Similar to Phosphoenolpyruvate carboxylase, housekeeping isozyme (EC 4.1.1.31) (PEPCase).
Os05t0398800-01	1.16008	6.39215	2.46208	-4.02437	5.71278e-05	0.00226785	Similar to Serine/threonine-protein kinase PBS1 (EC 2.7.1.37) (AvrPphB susceptible protein 1).
Os09t0416900-00	0.93659	5.201	2.4733	-3.91856	8.90814e-05	0.00330182	Armadillo-like helical domain containing protein.
Os05t0556400-01	5.97533	33.2042	2.47428	-4.94972	7.43191e-07	5.84132e-05	DOMON related domain containing protein.
Os03t0269700-01	1.08962	6.08583	2.48164	-3.49444	0.000475051	0.012937	Protein of unknown function DUF604 family protein.
Os03t0182800-01	2.74651	15.3694	2.48439	-4.32859	1.50067e-05	0.000753805	Similar to Ethylene responsive element binding factor3 (OsERF3).
Os08t0245200-01	3.4517	19.3443	2.48653	-4.85249	1.21923e-06	8.88854e-05	Similar to 4-coumarate--CoA ligase 1 (EC 6.2.1.12) (4CL 1) (4-coumaroyl-CoA synthase 1).
Os04t0469800-01	1.36563	7.66756	2.4892	-3.12985	0.00174896	0.0356391	Cytochrome P450 724B1 (EC 1.14.-.-) (OsDWARF11) (Dwarf protein 11).
Os10t0133500-01	0.228224	1.28815	2.49678	-3.07689	0.00209174	0.0406857	Transferase family protein.
Os10t0443000-00	1.41231	7.99341	2.50075	-3.69442	0.000220388	0.00704203	Hypothetical conserved gene.
Os08t0248700-01	1.20496	6.8216	2.50112	-3.77511	0.000159939	0.00537383	Similar to Blind.
Os06t0211700-00	0.392749	2.22673	2.50325	-3.27836	0.00104411	0.0239513	Hypothetical conserved gene.
Os04t0511400-01	1.84949	10.5435	2.51116	-3.64276	0.000269728	0.00828767	Sugar/inositol transporter domain containing protein.
Os02t0299200-01	2.15768	12.3151	2.51288	-4.37635	1.20683e-05	0.000621269	IQ calmodulin-binding region domain containing protein.
Os01t0294700-01	10.4781	59.8242	2.51336	-5.31535	1.06451e-07	1.13243e-05	Haem peroxidase, plant/fungal/bacterial family protein.
Os03t0128000-01	4.79825	27.4462	2.51602	-4.30836	1.64469e-05	0.000815842	FAS1 domain domain containing protein.
Os03t0113000-01	9.35181	53.6076	2.51912	-5.05823	4.23167e-07	3.65842e-05	Serine/threonine protein kinase domain containing protein.
Os11t0643800-01	0.780229	4.47301	2.51928	-3.75032	0.000176606	0.00587218	Similar to Sugar transporter family protein, expressed.
Os12t0182500-01	0.815996	4.68509	2.52144	-3.31944	0.000901977	0.0212586	Hypothetical protein.
Os06t0105700-01	1.41113	8.13136	2.52665	-4.03799	5.39109e-05	0.00216209	Protein of unknown function DUF6, transmembrane domain containing protein.
Os03t0191700-01	0.109966	0.634742	2.52911	-3.02742	0.00246648	0.0463693	Armadillo-like helical domain containing protein.
Os04t0508000-01	1.03141	5.96608	2.53217	-4.23865	2.24865e-05	0.00105292	Protein of unknown function DUF231, plant domain containing protein.
Os04t0416700-01	50.4382	293.375	2.54016	-5.73921	9.51188e-09	1.40728e-06	Harpin-induced 1 domain containing protein.
Os01t0285300-01	7.82114	45.509	2.5407	-5.37053	7.85059e-08	8.65332e-06	Myb transcription factor domain containing protein.
Os07t0634900-00	0.309098	1.80334	2.54453	-3.17845	0.00148063	0.0314072	Hypothetical conserved gene.
Os04t0615550-00	0.712136	4.17601	2.5519	-3.15188	0.00162221	0.033581	Hypothetical gene.
Os10t0471100-01	33.6286	197.888	2.55692	-5.62249	1.88229e-08	2.54919e-06	Wax-deficient anther1.
Os06t0589500-01	23.9911	141.327	2.55847	-5.75902	8.46051e-09	1.27313e-06	Conserved hypothetical protein.
Os11t0131900-01	10.7158	63.2922	2.56229	-5.6016	2.12387e-08	2.83279e-06	Similar to Arabinoxylan arabinofuranohydrolase isoenzyme AXAH-II.
Os10t0148700-01	5.65153	33.4547	2.56549	-4.94587	7.58028e-07	5.8922e-05	Protein of unknown function DUF1210 family protein.
Os04t0164701-01	0.427376	2.53139	2.56635	-3.02365	0.00249746	0.0467769	Protein of unknown function DUF295 family protein.
Os02t0528100-01	2.70906	16.0762	2.56906	-3.78032	0.000156625	0.00527798	Protein of unknown function DUF662 family protein.
Os06t0696600-01	68.5145	406.828	2.56994	-5.5364	3.0876e-08	3.8968e-06	Similar to Xyloglucan endo-transglycosylase homolog.
Os06t0575400-01	0.110512	0.657069	2.57184	-3.06896	0.00214804	0.0415815	Serine/threonine protein kinase-related domain containing protein.
Os10t0529300-01	8.12819	48.3848	2.57355	-5.01724	5.24201e-07	4.36363e-05	Similar to Tau class GST protein 3.
Os12t0493400-00	0.899107	5.36315	2.57652	-3.49878	0.000467398	0.0127483
Os10t0345900-01	10.2666	61.2987	2.57789	-4.52897	5.92722e-06	0.000343762	Hypothetical protein.
Os06t0681600-01	6.10732	36.574	2.5822	-4.83704	1.31789e-06	9.48992e-05	Haem peroxidase family protein.
Os12t0506700-01	0.314572	1.88686	2.58452	-3.31528	0.000915508	0.0214912	Carbamoyl phosphate synthetase, large subunit, ATP-binding domain containing protein.
Os10t0214132-00	1195.46	7189.33	2.58829	-5.85887	4.66025e-09	7.3431e-07	Similar to ribosomal protein L2.
Os01t0945600-01	0.372535	2.24284	2.58988	-3.41519	0.000637364	0.016163	Similar to amino acid permease family protein.
Os01t0214600-01	7.80831	47.1315	2.59361	-5.35169	8.71389e-08	9.44103e-06	Lipase, GDSL domain containing protein.
Os08t0459700-00	0.73338	4.4452	2.59962	-3.40581	0.000659675	0.0166155	Similar to Adenosine diphosphate glucose pyrophosphatase precursor.
Os05t0478000-01	0.955975	5.82372	2.6069	-3.51825	0.0004344	0.0120158	Zinc finger, RING/FYVE/PHD-type domain containing protein.
Os05t0206600-00	11.9944	73.1968	2.60941	-3.36231	0.00077293	0.0188251	Hypothetical conserved gene.
Os07t0694400-01	2.17208	13.2582	2.60973	-4.29834	1.72083e-05	0.000846408	Glycosyl transferase, family 43 protein.
Os04t0594800-01	0.152148	0.937478	2.62331	-3.26516	0.001094	0.0248209	Oligopeptide transporter OPT superfamily protein.
Os07t0204400-00	6.42376	39.7401	2.62911	-4.40909	1.03804e-05	0.000546361	Conserved hypothetical protein.
Os06t0715950-00	0.116164	0.720881	2.6336	-3.0257	0.00248058	0.0465103
Os05t0368600-01	0.431334	2.67846	2.63453	-3.31163	0.000927552	0.0217305	Heavy metal transport/detoxification protein domain containing protein.
Os12t0626200-01	6.3164	39.4228	2.64186	-4.5702	4.87254e-06	0.00029071	Auxin responsive SAUR protein family protein.
Os01t0753800-01	3.13793	19.7869	2.65666	-4.78529	1.70739e-06	0.000117423	Conserved hypothetical protein.
Os11t0290600-01	0.381359	2.40665	2.65781	-3.3228	0.000891189	0.0210786	Similar to Serpin.
Os04t0123700-00	0.938383	5.93383	2.66072	-3.00815	0.0026284	0.0487112
Os03t0679800-01	0.339386	2.14942	2.66295	-4.11965	3.79448e-05	0.00162742	Similar to TPR Domain containing protein.
Os04t0107300-01	0.264322	1.67718	2.66567	-3.1217	0.00179813	0.0363466	NAD(P)-binding domain containing protein.
Os06t0656800-01	34.4219	218.471	2.66605	-5.98902	2.11109e-09	3.73958e-07	FAS1 domain domain containing protein.
Os07t0691700-01	0.590817	3.75329	2.66737	-4.25286	2.11053e-05	0.00100022	Conserved hypothetical protein.
Os02t0725500-00	68.7688	437.418	2.66918	-5.97997	2.23182e-09	3.91311e-07	Cupredoxin domain containing protein.
Os11t0139400-01	0.687263	4.39108	2.67564	-3.86443	0.000111348	0.00398519	Protein of unknown function DUF250 domain containing protein.
Os09t0511900-01	0.272402	1.74522	2.6796	-3.46376	0.00053269	0.0140608	Glycoside hydrolase, family 1 protein.
Os12t0629300-00	1.35479	8.69923	2.68282	-3.60115	0.000316811	0.00939054	Similar to Thaumatin-like protein.
Os02t0695600-01	7.77251	49.9739	2.68472	-4.88677	1.02506e-06	7.59884e-05	Conserved hypothetical protein.
Os06t0609400-01	9.88267	63.8035	2.69066	-5.1091	3.23705e-07	2.92264e-05	Peptidase S8, subtilisin-related domain containing protein.
Os04t0410400-01	0.327372	2.11411	2.69105	-3.39862	0.00067726	0.0169493	Root cap family protein.
Os04t0523600-01	5.59711	36.1524	2.69134	-5.17824	2.23989e-07	2.11019e-05	UDP-glucuronosyl/UDP-glucosyltransferase family protein.
Os10t0498000-01	3.19378	20.637	2.69189	-4.71952	2.36399e-06	0.000155591	Similar to Epoxide hydrolase.
Os01t0545100-01	4.00086	25.9591	2.69786	-4.38881	1.13972e-05	0.000592788	Conserved hypothetical protein.
Os08t0124500-01	0.375562	2.43789	2.69851	-3.82824	0.000129065	0.00453103	Similar to Resistance protein candidate (Fragment).
Os11t0460800-01	0.330501	2.15062	2.70202	-3.53728	0.000404269	0.0114063	Peptidase S10, serine carboxypeptidase family protein.
Os10t0149200-01	1.05314	6.91819	2.7157	-3.86547	0.000110874	0.00397567	Protein of unknown function DUF1210 family protein.
Os10t0150600-01	22.7658	149.751	2.71762	-5.97201	2.34343e-09	4.085e-07	Protein of unknown function DUF1210 family protein.
Os03t0263600-01	0.407724	2.71265	2.73404	-3.64884	0.000263427	0.00813665	Six-bladed beta-propeller, TolB-like domain containing protein.
Os01t0720500-01	190.338	1268.06	2.73599	-5.59159	2.25002e-08	2.9601e-06	Similar to Type I chlorophyll a/b-binding protein b (Fragment).
Os03t0299700-01	0.218783	1.47029	2.74853	-3.23109	0.0012332	0.0272588	Conserved hypothetical protein.
Os11t0457300-01	0.806575	5.42518	2.74979	-4.16389	3.12871e-05	0.00138751	UDP-glucuronosyl/UDP-glucosyltransferase family protein.
Os11t0231400-01	0.358486	2.41479	2.75191	-3.54398	0.000394128	0.0111709	Protein of unknown function DUF295 family protein.
Os01t0928400-01	0.104442	0.703876	2.75262	-3.03034	0.00244276	0.0460217	Conserved hypothetical protein.
Os06t0263400-00	0.107491	0.724828	2.75342	-3.03123	0.00243564	0.0459366	Similar to 3-ketoacyl-CoA synthase.
Os10t0323500-01	3.18085	21.5329	2.75906	-5.27327	1.34015e-07	1.38796e-05	Similar to Beta-glucosidase.
Os03t0805700-00	0.320121	2.16851	2.76001	-3.5562	0.000376253	0.0107976	Similar to pheophorbide a oxygenase.
Os05t0514400-00	0.222319	1.50993	2.76378	-3.35628	0.000789971	0.0191234	Hypothetical conserved gene.
Os05t0500900-01	2.20834	15.099	2.77342	-5.16141	2.45103e-07	2.28322e-05	Similar to Indole-3-acetic acid-amido synthetase GH3.5 (EC 6.3.2.-) (Auxin- responsive GH3-like protein 5) (AtGH3-5).
Os02t0657000-01	0.729196	5.00046	2.77768	-3.74124	0.000183111	0.00603719	AP2 domain-containing protein Rap211.
Os11t0211800-01	1.75294	12.0554	2.78183	-3.96582	7.31439e-05	0.00280243	Hypothetical protein.
Os06t0152700-01	2.53558	17.5675	2.79252	-5.20903	1.89825e-07	1.8567e-05	Protein of unknown function DUF821, CAP10-like family protein.
Os05t0470900-00	0.138203	0.966438	2.80589	-3.20076	0.00137065	0.0296275	Hypothetical conserved gene.
Os07t0505300-01	1.64459	11.5738	2.81505	-4.41964	9.88645e-06	0.00052507	Hypothetical gene.
Os01t0543100-01	1.84111	12.9655	2.81602	-4.69321	2.68954e-06	0.000174088	Similar to Peroxidase 72 precursor (EC 1.11.1.7) (Atperox P72) (PRXR8) (ATP6a).
Os08t0203350-01	1.99505	14.0506	2.81614	-3.85504	0.000115712	0.00411561	Hypothetical protein.
Os01t0655600-00	0.319933	2.25839	2.81945	-3.00373	0.00266696	0.0491834
Os04t0629700-01	8.23132	58.1575	2.82077	-5.46903	4.52507e-08	5.383e-06	Similar to Kinesin-1 (Kinesin-like protein A).
Os02t0753400-01	0.0992506	0.70699	2.83254	-3.02803	0.00246151	0.0463006	Conserved hypothetical protein.
Os05t0527700-01	0.997009	7.16183	2.84465	-3.12036	0.00180632	0.0364912	UDP-glucuronosyl/UDP-glucosyltransferase family protein.
Os11t0156200-01	5.91583	42.794	2.85476	-5.90454	3.53639e-09	5.90158e-07	Peptidase S28 family protein.
Os11t0151900-00	2.37213	17.1708	2.85571	-4.02158	5.78095e-05	0.00229233
Os11t0458500-00	0.263045	1.93441	2.87851	-3.78979	0.000150773	0.00512454	Hypothetical conserved gene.
Os04t0165000-01	0.850412	6.28343	2.88532	-3.93427	8.3449e-05	0.00312264	Similar to Thaumatin-like protein 1 precursor.
Os06t0727900-00	0.0788818	0.584287	2.88891	-3.09584	0.00196254	0.038897
Os11t0652600-01	0.0600335	0.445917	2.89293	-3.13831	0.00169928	0.0348486	Hypothetical conserved gene.
Os10t0391400-01	4.86644	36.2908	2.89867	-5.08834	3.61215e-07	3.17329e-05	Tify domain containing protein.
Os04t0675400-01	3.20442	23.9374	2.90113	-5.52251	3.34185e-08	4.15209e-06	Similar to Chaperone protein dnaJ.
Os10t0190100-01	0.159484	1.19192	2.9018	-3.27034	0.00107417	0.0244654	Sulfotransferase family protein.
Os03t0155300-00	0.596963	4.47899	2.90746	-3.7667	0.000165417	0.00552625	Similar to Alpha-expansin precursor.
Os05t0575800-01	0.199001	1.49786	2.91206	-3.40512	0.000661361	0.0166461	Hypothetical conserved gene.
Os03t0168300-01	10.3482	78.0057	2.9142	-4.04773	5.17176e-05	0.00208847	Conserved hypothetical protein.
Os08t0501700-01	0.175671	1.33544	2.92637	-4.04405	5.25353e-05	0.00211656	Serine/threonine protein kinase-related domain containing protein.
Os04t0445000-01	0.557317	4.23994	2.92748	-4.05909	4.92647e-05	0.00200776	Similar to Potassium channel SKOR (Stelar K(+) outward rectifying channel).
Os01t0686300-01	0.209794	1.59756	2.92882	-3.66339	0.000248895	0.00779032	UDP-glucuronosyl/UDP-glucosyltransferase family protein.
Os12t0244400-01	1.95507	15.0041	2.94006	-5.20059	1.98657e-07	1.92174e-05	Similar to Lysine and histidine specific transporter.
Os07t0560400-01	0.0762153	0.58832	2.94845	-3.23986	0.00119587	0.0266176	Hypothetical conserved gene.
Os12t0236200-01	0.1394	1.07715	2.94992	-3.16619	0.00154448	0.0323716	Non-protein coding transcript.
Os10t0150400-01	8.82078	68.5816	2.95884	-5.85848	4.67129e-09	7.3431e-07	Protein of unknown function DUF1210 family protein.
Os05t0124700-01	0.114993	0.897917	2.96504	-3.32256	0.000891942	0.0210786	Deoxynucleoside kinase family protein.
Os07t0511300-00	0.203923	1.59712	2.96937	-3.27771	0.00104654	0.0239758
Os01t0566000-01	0.199298	1.57138	2.97903	-3.57742	0.000347003	0.0101232	Armadillo-like helical domain containing protein.
Os04t0619000-01	0.32174	2.55634	2.99011	-4.06991	4.70314e-05	0.00193692	Similar to L1332.9 protein.
Os03t0157700-02	0.037107	0.295169	2.99178	-3.05142	0.00227758	0.0435151	Hypothetical conserved gene.
Os08t0546300-01	1.71182	13.6202	2.99215	-4.04624	5.20478e-05	0.00209932	Conserved hypothetical protein.
Os07t0489650-00	11.3927	90.9278	2.99661	-3.45855	0.000543082	0.014284	Hypothetical gene.
Os11t0549615-01	0.516944	4.20179	3.02293	-4.0849	4.40953e-05	0.00184186	Metallophosphoesterase domain containing protein.
Os03t0729600-01	0.168812	1.3808	3.03201	-3.32705	0.000877713	0.0208402	Conserved hypothetical protein.
Os01t0702300-00	0.147109	1.20626	3.03559	-3.56923	0.000358025	0.0104102	Similar to Subtilisin-like serine protease.
Os01t0863800-00	0.412702	3.40109	3.04283	-3.67899	0.000234163	0.00740821	Protein of unknown function DUF623, plant domain containing protein.
Os11t0570950-00	0.740118	6.13838	3.05203	-3.81165	0.000138043	0.00477952
Os01t0976200-01	20.9901	174.132	3.0524	-6.79411	1.08984e-11	3.22483e-09	11-S plant seed storage protein family protein.
Os04t0649500-01	0.457652	3.80393	3.05517	-3.71437	0.000203707	0.00658068	Conserved hypothetical protein.
Os01t0608101-00	0.130465	1.08922	3.06156	-3.53417	0.000409064	0.0115048	Conserved hypothetical protein.
Os08t0112900-01	0.929556	7.80342	3.06949	-4.57128	4.84752e-06	0.000289798	Lipase, GDSL domain containing protein.
Os07t0138000-00	0.305236	2.57877	3.07869	-3.51896	0.000433248	0.0120028
Os10t0336300-00	0.022986	0.194549	3.0813	-3.05297	0.00226591	0.0433391
Os01t0957800-01	0.20444	1.73085	3.08173	-3.79396	0.000148263	0.00504897	Cytochrome P450 family protein.
Os07t0607400-01	1.17433	9.9829	3.08762	-5.03289	4.83133e-07	4.06016e-05	Pectin lyase fold/virulence factor domain containing protein.
Os04t0561900-02	0.98343	8.38911	3.09262	-4.47225	7.73992e-06	0.000425177	Cupredoxin domain containing protein.
Os04t0580800-01	3.91087	33.3833	3.09356	-5.5856	2.32897e-08	3.04862e-06	Zinc finger, RING/FYVE/PHD-type domain containing protein.
Os02t0111900-01	0.0741611	0.633432	3.09445	-3.67237	0.000240307	0.00756184	DEAD-like helicase, N-terminal domain containing protein.
Os08t0293850-00	0.560538	4.82419	3.1054	-3.05082	0.00228215	0.0435787	Hypothetical conserved gene.
Os03t0162300-01	0.334932	2.88636	3.10731	-3.6594	0.000252803	0.0078846	Hypothetical protein.
Os04t0552200-00	0.0660666	0.569505	3.10772	-3.0435	0.00233845	0.0444849	Beta-expansin 5.
Os12t0637000-00	0.455977	3.93989	3.11112	-4.18508	2.85064e-05	0.00128191	Purple acid phosphatase precursor (EC 3.1.3.2).
Os12t0136100-00	0.174648	1.52522	3.1265	-3.62619	0.000287637	0.00873129	Similar to Plastidic phosphate translocator-like protein1.
Os02t0765600-01	0.0450636	0.393738	3.1272	-3.10188	0.00192296	0.038255	Alpha-amylase precursor (EC 3.2.1.1) (1,4-alpha-D-glucan glucanohydrolase) (Isozyme 1B).
Os04t0350700-01	0.281693	2.46366	3.12861	-4.02457	5.70801e-05	0.00226785	Similar to Phytochrome-interacting factor 4 (Basic helix-loop-helix protein 9) (bHLH9) (AtbHLH009) (Short under red-light 2).
Os05t0335500-00	0.190867	1.67259	3.13144	-3.33751	0.000845329	0.0202902	Conserved hypothetical protein.
Os03t0806800-02	13.3976	117.506	3.13268	-5.92235	3.17376e-09	5.37281e-07	Conserved hypothetical protein.
Os02t0613100-00	0.114291	1.00332	3.134	-3.53587	0.000406427	0.0114489	Hypothetical conserved gene.
Os01t0153600-00	0.658989	5.80873	3.1399	-4.13576	3.53789e-05	0.00152854
Os06t0228500-01	1.71044	15.101	3.14221	-5.26062	1.43574e-07	1.46537e-05	Amino acid transporter, transmembrane domain containing protein.
Os10t0149100-00	0.408796	3.62168	3.14721	-3.60393	0.000313439	0.00932164	Similar to proline-rich protein.
Os10t0498100-01	1.41788	12.6348	3.1556	-5.48953	4.03001e-08	4.85975e-06	Conserved hypothetical protein.
Os05t0165500-01	0.669329	5.98642	3.16091	-3.08826	0.00201331	0.0395827	Conserved hypothetical protein.
Os08t0214300-00	0.181439	1.62347	3.16153	-3.71105	0.000206402	0.00665553	Hypothetical conserved gene.
Os10t0533150-00	0.411732	3.69251	3.16483	-4.36167	1.29075e-05	0.00065965	Similar to BRASSINOSTEROID INSENSITIVE 1-associated receptor kinase 1.
Os08t0489300-03	5.64618	50.6865	3.16625	-5.35666	8.47729e-08	9.24155e-06	DNA-3-methyladenine glycosidase I-like protein.
Os12t0610800-01	0.0732496	0.662165	3.1763	-3.11811	0.00182014	0.0367043	Uncharacterised protein family UPF0497, trans-membrane plant subgroup domain containing protein.
Os05t0527532-00	0.547297	4.98306	3.18664	-3.43394	0.000594881	0.0152786	Hypothetical gene.
Os07t0590100-01	0.120298	1.10738	3.20247	-3.29409	0.000987408	0.0228741	Zinc finger, C2H2-type domain containing protein.
Os11t0433300-00	0.136382	1.25617	3.2033	-3.55315	0.00038064	0.010888	Kelch related domain containing protein.
Os07t0572400-01	1.56193	14.414	3.20606	-4.90502	9.3419e-07	7.01751e-05	Conserved hypothetical protein.
Os01t0319000-01	0.86471	8.02857	3.21486	-5.22178	1.77211e-07	1.73815e-05	Similar to Pectin acetylesterase (Fragment).
Os03t0114100-01	0.141713	1.32486	3.22479	-3.11251	0.00185502	0.0371977	Conserved hypothetical protein.
Os10t0200700-01	0.755714	7.07191	3.22619	-4.6772	2.90813e-06	0.000186523	Conserved hypothetical protein.
Os08t0241800-01	0.165375	1.56356	3.24102	-3.81726	0.000134941	0.00470532	Similar to Plasma membrane H+-ATPase (EC 3.6.1.3).
Os05t0580200-01	0.200306	1.9052	3.24966	-3.60856	0.000307898	0.00918788	Conserved hypothetical protein.
Os08t0176700-00	0.0170713	0.162729	3.25282	-3.03964	0.0023686	0.0449807
Os09t0559200-01	0.151709	1.45287	3.25953	-3.81561	0.00013585	0.00472681	RuvA domain 2-like containing protein.
Os04t0413200-01	1.8377	17.7519	3.27201	-6.00349	1.93126e-09	3.50825e-07	Similar to Cell wall invertase (EC 3.2.1.26).
Os05t0178000-00	0.0704548	0.684543	3.28037	-3.4701	0.000520267	0.0138785	NPH3 domain containing protein.
Os01t0688300-00	0.0895034	0.875734	3.29048	-3.35621	0.000790199	0.0191234	Similar to Isopentenyl transferase IPT8.
Os06t0153100-01	0.280656	2.76781	3.30187	-3.99429	6.4888e-05	0.00252468	Protein of unknown function DUF581 family protein.
Os04t0391600-00	0.458021	4.54491	3.31077	-3.67439	0.000238415	0.00752246
Os02t0131400-00	0.0407284	0.404949	3.31363	-3.38572	0.000709925	0.0176041	Beta-D-glucan exohydrolase, isoenzyme ExoII (EC 3.2.1.58).
Os01t0829700-01	0.0795531	0.795608	3.32207	-3.34848	0.000812571	0.0195974	Conserved hypothetical protein.
Os01t0631900-00	0.175137	1.75435	3.32438	-4.07272	4.64669e-05	0.00192041	Similar to aspartic proteinase oryzasin-1.
Os02t0628200-01	0.707436	7.08771	3.32465	-4.69027	2.7284e-06	0.000175957	Protein of unknown function DUF250 domain containing protein.
Os05t0527800-01	0.64237	6.44569	3.32686	-3.8752	0.000106538	0.00384199	UDP-glucuronosyl/UDP-glucosyltransferase family protein.
Os08t0431200-00	0.426279	4.33465	3.34605	-4.99105	6.00515e-07	4.8722e-05	Similar to Formin-like protein 9.
Os03t0259100-01	1.34944	13.7489	3.34888	-4.72037	2.35412e-06	0.000155231	Similar to Basic blue protein (Cusacyanin) (Plantacyanin) (CBP).
Os01t0824900-01	0.316641	3.23071	3.35093	-4.10634	4.01977e-05	0.00170535	Conserved hypothetical protein.
Os06t0219900-01	0.894867	9.1854	3.3596	-4.98498	6.19696e-07	4.9933e-05	Similar to Phi-1 protein.
Os05t0421100-00	0.0903194	0.930106	3.36429	-3.14795	0.00164421	0.0339764	Protein of unknown function DUF538 family protein.
Os08t0277200-01	0.747046	7.70333	3.36621	-4.9621	6.97341e-07	5.50556e-05	Similar to Cinnamoyl-CoA reductase (EC 1.2.1.44).
Os02t0583300-00	0.0212394	0.220854	3.37828	-3.28682	0.00101326	0.0233653	Similar to OSIGBa0132O24.3 protein.
Os04t0466000-01	1.00231	10.4267	3.37889	-4.51977	6.19058e-06	0.000356475	Conserved hypothetical protein.
Os04t0123750-00	3.52346	36.6797	3.37992	-3.97248	7.11277e-05	0.00273124
Os03t0212000-00	0.0529323	0.555059	3.39042	-3.47289	0.000514894	0.0137769	Hypothetical conserved gene.
Os06t0231050-00	2.43961	25.6553	3.39453	-5.38454	7.26297e-08	8.09316e-06	Uncharacterised protein family UPF0497, trans-membrane plant subgroup domain containing protein.
Os04t0689900-01	0.0847238	0.892649	3.39725	-3.60868	0.000307763	0.00918788	Similar to Pathogenesis-related protein 5 precursor (PR-5).
Os06t0609200-00	0.572098	6.03095	3.39805	-3.00439	0.00266114	0.0491498
Os08t0489300-01	7.86769	84.7649	3.42946	-4.40239	1.07065e-05	0.000562683	Methyladenine glycosylase domain containing protein.
Os01t0952000-01	0.0614165	0.666363	3.43961	-3.07968	0.0020722	0.0403799	Similar to Germin-like protein 1-3.
Os11t0596200-00	0.0425683	0.462362	3.44117	-3.45055	0.000559443	0.0145522	Hypothetical conserved gene.
Os04t0123800-00	0.394131	4.28913	3.44394	-3.2094	0.00133014	0.0289117	Hypothetical conserved gene.
Os09t0565350-00	0.0271911	0.296829	3.44843	-3.08492	0.00203608	0.0398844
Os03t0368900-01	0.0419336	0.460237	3.4562	-3.36959	0.000752803	0.0184466	Haem peroxidase family protein.
Os01t0549300-01	0.205819	2.27531	3.46661	-4.42612	9.5942e-06	0.000513777	Homeodomain-like containing protein.
Os12t0568500-01	0.397347	4.39829	3.46847	-3.74071	0.000183504	0.00603882	Metallothionein-like protein type 1.
Os05t0577900-01	0.0484892	0.537429	3.47034	-3.48287	0.000496074	0.0133885	Conserved hypothetical protein.
Os07t0297100-01	3.52436	39.0898	3.47136	-6.09023	1.12747e-09	2.18134e-07	MATH domain containing protein.
Os01t0361700-01	7.16346	79.6066	3.47416	-5.67012	1.42694e-08	2.02602e-06	Conserved hypothetical protein.
Os11t0620800-00	0.0622538	0.700553	3.49226	-3.12413	0.00178332	0.0361303	Hypothetical conserved gene.
Os03t0793800-01	0.654393	7.46779	3.51245	-4.58474	4.54552e-06	0.000276915	Plant lipid transfer protein and hydrophobic protein, helical domain containing protein.
Os08t0376300-01	1.94821	22.3543	3.52033	-6.92351	4.40603e-12	1.37297e-09	Similar to Leucine-rich receptor-like protein kinase.
Os06t0553800-01	2.42233	27.994	3.53065	-5.66857	1.43995e-08	2.03629e-06	Cupredoxin domain containing protein.
Os07t0547200-00	0.0204146	0.237399	3.53964	-3.17542	0.0014962	0.0316802
Os06t0317600-01	1.72109	20.0253	3.54044	-5.09774	3.43736e-07	3.07199e-05	Similar to Similarity.
Os10t0150800-01	47.1218	548.717	3.54159	-7.77699	7.32747e-15	4.03148e-12	Protein of unknown function DUF1210 family protein.
Os09t0571000-00	0.0494082	0.576662	3.5449	-3.56681	0.000361351	0.0104896	Protein of unknown function DUF966 family protein.
Os08t0410900-01	0.890881	10.3984	3.54498	-4.79317	1.64165e-06	0.000113791	Hypothetical gene.
Os05t0319100-00	0.240707	2.85055	3.56589	-4.58038	4.64132e-06	0.000281776	Similar to predicted protein.
Os02t0310500-00	0.0807463	0.971088	3.58813	-3.61329	0.00030234	0.00905154
Os11t0631600-00	4.22243	51.1832	3.59952	-6.00252	1.94283e-09	3.50825e-07	MATH domain containing protein.
Os04t0586700-01	0.603845	7.354	3.60628	-4.72611	2.28864e-06	0.000152628	Zinc finger, RING/FYVE/PHD-type domain containing protein.
Os05t0163300-01	4.7675	58.1421	3.60828	-6.78876	1.13098e-11	3.31868e-09	Similar to Arabinogalactan protein-like.
Os05t0237800-00	0.0315356	0.386121	3.614	-3.41359	0.000641118	0.0162048	Similar to Histidine amino acid transporter.
Os04t0545250-01	1.87519	23.1351	3.62498	-6.03308	1.60863e-09	2.98121e-07	Conserved hypothetical protein.
Os06t0286228-01	0.129676	1.63173	3.65342	-3.33144	0.000863987	0.0206116	Cupredoxin domain containing protein.
Os05t0189900-01	2.57131	32.8285	3.67437	-6.31588	2.6862e-10	5.83867e-08	Vegetative storage protein/acid phosphatase domain containing protein.
Os10t0545500-00	2.36777	30.9177	3.70684	-6.23362	4.55784e-10	9.4965e-08	Similar to Cellulase (EC 3.2.1.4) (Fragment).
Os02t0130600-01	3.90353	51.1448	3.71174	-7.22642	4.95826e-13	1.97811e-10	Conserved hypothetical protein.
Os04t0554200-02	0.558907	7.34182	3.71546	-4.7889	1.67699e-06	0.000115785	PapD-like domain containing protein.
Os04t0447800-01	1.4627	19.2401	3.71741	-6.39338	1.62254e-10	3.616e-08	Glutamate decarboxylase (EC 4.1.1.15).
Os01t0854500-01	0.0315722	0.420081	3.73394	-3.3669	0.00076018	0.0185756	Homeobox domain containing protein.
Os08t0402800-01	1.32264	17.6281	3.73639	-5.7635	8.23896e-09	1.24511e-06	Protein of unknown function DUF6, transmembrane domain containing protein.
Os04t0552300-01	0.398002	5.38676	3.75857	-5.01388	5.33424e-07	4.42994e-05	Cyclin-related 2 domain containing protein.
Os07t0600000-01	0.074666	1.02654	3.7812	-4.07491	4.60322e-05	0.00190468	Conserved hypothetical protein.
Os06t0539700-01	0.0365671	0.503741	3.78406	-3.03125	0.00243544	0.0459366	Conserved hypothetical protein.
Os07t0599900-01	5.74768	79.18	3.78408	-6.65049	2.92122e-11	7.79257e-09	Conserved hypothetical protein.
Os12t0605900-01	0.266478	3.6712	3.78416	-5.00088	5.70691e-07	4.69299e-05	Similar to Kinase like protein.
Os07t0559000-01	0.973529	13.4686	3.79023	-4.50398	6.66924e-06	0.00037514	Non-protein coding transcript.
Os03t0749100-01	2.30312	31.9927	3.79608	-7.21085	5.56e-13	2.15141e-10	Similar to Beta-glucanase.
Os02t0458100-01	0.0354048	0.492928	3.79936	-3.85778	0.00011442	0.00408202	Similar to Sesquiterpene cyclase 1.
Os11t0241700-01	0.882413	12.3211	3.80354	-5.22461	1.74525e-07	1.72156e-05	Protein of unknown function DUF538 family protein.
Os05t0223500-00	0.469558	6.55679	3.80361	-3.58079	0.000342557	0.0100184	null
Os08t0164100-01	0.0154509	0.216118	3.80606	-3.05319	0.00226426	0.0433391	Protein of unknown function DUF295 family protein.
Os02t0535300-00	0.708299	9.98285	3.81702	-5.09797	3.43322e-07	3.07199e-05	Hypothetical conserved gene.
Os10t0528900-01	0.0331428	0.467548	3.81834	-3.45111	0.000558282	0.0145401	Similar to Tau class GST protein 3.
Os06t0137400-00	0.603456	8.52207	3.81988	-4.01986	5.82326e-05	0.00230651	Hypothetical conserved gene.
Os12t0515300-00	0.12154	1.71718	3.82054	-4.46823	7.8869e-06	0.000432575	Similar to R2R3-MYB transcription factor.
Os01t0850800-00	0.0442652	0.627201	3.82468	-3.88617	0.000101839	0.00370833	Similar to Laccase-8.
Os11t0291500-01	0.360745	5.13378	3.83097	-4.99145	5.99288e-07	4.8722e-05	Similar to Beta-D-xylosidase.
Os02t0520500-01	8.18525	116.549	3.83177	-6.93315	4.11582e-12	1.29398e-09	Conserved hypothetical protein.
Os03t0587600-01	0.0132917	0.189488	3.83351	-3.46874	0.000522908	0.0139173	Zinc finger, CCHC-type domain containing protein.
Os08t0527500-00	0.0324574	0.463915	3.83724	-3.64972	0.000262525	0.00811591	null
Os09t0368500-01	0.291413	4.16702	3.83788	-5.09096	3.56261e-07	3.15771e-05	Similar to Polyamine oxidase precursor (EC 1.5.3.11).
Os03t0782300-01	23.2397	333.327	3.84228	-8.26585	2.22045e-16	1.56373e-13	Conserved hypothetical protein.
Os02t0587000-01	0.0732682	1.0533	3.84559	-3.65426	0.000257928	0.00799487	Similar to Glycine rich protein (Fragment).
Os09t0307300-02	2.68053	38.7918	3.85516	-3.47963	0.000502103	0.0135272	Similar to Microtubule-associated protein.
Os09t0545700-01	0.252224	3.65115	3.85557	-4.15506	3.252e-05	0.0014278	Similar to Auxin induced protein.
Os03t0115800-01	1.41388	20.6172	3.86612	-6.40262	1.52728e-10	3.42539e-08	Conserved hypothetical protein.
Os01t0123200-00	0.0183774	0.268768	3.87035	-3.10896	0.00187746	0.037513	null
Os01t0700900-01	0.0468468	0.686123	3.87244	-4.11742	3.83134e-05	0.00163725	Cytochrome P450 family protein.
Os05t0242600-01	2.63998	38.9402	3.88266	-6.68647	2.28624e-11	6.2893e-09	Prefoldin domain containing protein.
Os07t0602800-00	0.095218	1.41617	3.89461	-4.21343	2.51518e-05	0.00115318	Similar to glycerophosphoryl diester phosphodiesterase.
Os09t0483300-01	0.0631721	0.940143	3.89552	-3.52485	0.000423725	0.0118414	EF hand domain containing protein.
Os02t0823700-00	0.260983	3.89579	3.89989	-4.88744	1.02154e-06	7.58869e-05	Similar to Xyloglucan endotransglucosylase/hydrolase 9.
Os03t0400200-00	0.0656126	0.979923	3.90062	-3.12904	0.00175377	0.0357165	null
Os02t0631700-01	0.418576	6.31734	3.91576	-4.21886	2.45545e-05	0.00113169	null
Os06t0254600-01	12.8482	194.7	3.92161	-8.05973	6.66134e-16	4.42564e-13	Caleosin related family protein.
Os07t0104100-01	0.867997	13.26	3.93325	-5.31032	1.09436e-07	1.16068e-05	Similar to Peroxidase 27 precursor (EC 1.11.1.7) (Atperox P27) (PRXR7) (ATP12a).
Os02t0517750-00	0.391026	5.97739	3.93418	-4.72215	2.33363e-06	0.000154168	Hypothetical gene.
Os05t0190300-03	13.0114	198.966	3.93467	-8.27214	2.22045e-16	1.56373e-13	Acid phosphatase (Class B) family protein.
Os12t0493200-00	0.0984014	1.51071	3.9404	-4.33565	1.45332e-05	0.000733158	null
Os07t0419300-01	0.437893	6.74012	3.94412	-5.18079	2.20944e-07	2.09701e-05	Similar to Thaumatin-like protein.
Os02t0492500-01	0.0295101	0.455365	3.94774	-3.76818	0.000164442	0.00550411	Protein of unknown function DUF1618 domain containing protein.
Os01t0301500-01	0.0617058	0.956886	3.95487	-4.29029	1.7844e-05	0.00087267	Pentatricopeptide repeat domain containing protein.
Os09t0380100-00	0.572098	8.90283	3.95993	-3.55721	0.000374814	0.010765	Hypothetical conserved gene.
Os01t0842400-01	0.105207	1.64037	3.96272	-4.41618	1.00459e-05	0.000532733	Similar to Laccase (EC 1.10.3.2).
Os10t0518000-00	0.551919	8.63063	3.96694	-4.1137	3.89368e-05	0.00166187	Non-protein coding transcript.
Os11t0641900-00	0.0127016	0.199172	3.97094	-3.19789	0.00138439	0.0298347	null
Os01t0537250-01	0.498851	7.83049	3.97242	-5.44696	5.12374e-08	6.03402e-06	Conserved hypothetical protein.
Os04t0554800-01	0.0535796	0.843313	3.97631	-3.943	8.04688e-05	0.00303369	Similar to RCc3 protein.
Os07t0601600-00	0.057789	0.913806	3.98302	-4.06809	4.74006e-05	0.00194985	Similar to VEP1 (VEIN PATTERNING 1); binding / catalytic.
Os09t0307300-01	2.22949	35.2648	3.98344	-6.5896	4.41012e-11	1.12528e-08	Targeting for Xklp2 family protein.
Os04t0400500-00	0.126632	2.00897	3.98774	-3.94858	7.86148e-05	0.00297654	null
Os01t0594500-01	28.1907	447.536	3.98871	-8.61185	0	0	Conserved hypothetical protein.
Os06t0347300-00	0.129902	2.09326	4.01025	-4.09337	4.25155e-05	0.00178646	Hypothetical conserved gene.
Os11t0661600-01	0.304302	4.96045	4.0269	-5.26577	1.39605e-07	1.43317e-05	Similar to Peroxidase (EC 1.11.1.7).
Os03t0381000-01	2.02752	33.0729	4.02786	-6.99768	2.60236e-12	8.48467e-10	Similar to Aldose 1-epimerase-like protein.
Os06t0534950-00	3.91978	63.9547	4.02821	-7.00832	2.41185e-12	8.01189e-10	Hypothetical conserved gene.
Os01t0127900-01	0.73821	12.0607	4.03014	-6.2658	3.70919e-10	7.95924e-08	Mannose-6-phosphate isomerase domain containing protein.
Os02t0504850-00	0.222206	3.65115	4.03838	-4.29597	1.73932e-05	0.000852994	Hypothetical gene.
Os01t0942300-01	0.90617	14.8963	4.03903	-5.01315	5.35473e-07	4.43649e-05	Similar to Beta glucanase precursor (EC 3.2.1.73) (Fragment).
Os02t0816300-01	0.913781	15.2431	4.06016	-6.83759	8.05356e-12	2.40324e-09	Armadillo-type fold domain containing protein.
Os01t0772100-01	0.0653613	1.09059	4.06052	-3.88552	0.00010211	0.00371436	Hypothetical conserved gene.
Os09t0497500-01	4.36005	73.5703	4.07671	-6.77151	1.27443e-11	3.70868e-09	Similar to Ervatamin B (EC 3.4.22.-) (ERV-B).
Os05t0270500-01	0.0182933	0.321011	4.13323	-3.34019	0.000837205	0.0201226	Similar to predicted protein.
Os04t0689800-00	0.0196223	0.344919	4.13569	-3.34218	0.000831238	0.0199929
Os05t0135500-01	4.79925	84.519	4.13839	-8.10533	4.44089e-16	3.00717e-13	Haem peroxidase family protein.
Os08t0466800-00	0.0973504	1.72939	4.15093	-4.27729	1.89182e-05	0.000920095
Os09t0499500-01	0.188787	3.35602	4.15192	-4.25325	2.10693e-05	0.000999855	Hypothetical protein.
Os03t0421700-00	0.076804	1.36955	4.15638	-4.1439	3.41453e-05	0.00148618	Similar to fumarylacetoacetate hydrolase domain-containing protein 1.
Os05t0514350-01	0.6712	11.985	4.15834	-4.57917	4.66834e-06	0.00028248	Non-protein coding transcript.
Os11t0644650-01	1.40988	25.2377	4.16194	-3.51936	0.000432597	0.0119942	Conserved hypothetical protein.
Os12t0634300-00	0.0258545	0.463149	4.16299	-3.80112	0.000144044	0.00493873
Os07t0602000-01	8.43957	152.305	4.17365	-8.52899	0	0	Similar to NADPH HC toxin reductase (Fragment).
Os11t0566800-01	0.0334907	0.606082	4.17768	-4.01614	5.91592e-05	0.00233699	Similar to Bibenzyl synthase (EC 2.3.1.-).
Os12t0162700-00	0.0526931	0.973457	4.20743	-4.43677	9.13208e-06	0.000493946
Os04t0655400-01	0.024357	0.459478	4.23759	-3.43184	0.00059949	0.0153745	Conserved hypothetical protein.
Os06t0695300-01	0.0297844	0.564436	4.24418	-3.54543	0.000391967	0.0111393	Haem peroxidase, plant/fungal/bacterial family protein.
Os04t0140400-00	0.19022	3.64711	4.26102	-4.25092	2.12897e-05	0.00100625
Os01t0567533-00	0.572928	11.2044	4.28957	-5.11106	3.20362e-07	2.91046e-05	Hypothetical gene.
Os02t0198700-01	0.236175	4.69852	4.31428	-4.12218	3.75309e-05	0.00161163	Similar to Subtilisin-like protease.
Os01t0567500-01	0.196938	3.92475	4.31678	-3.89096	9.98499e-05	0.003651	Similar to Monosaccharide transporter 3.
Os06t0594600-00	0.638396	12.8973	4.33648	-5.70344	1.17414e-08	1.68751e-06	Similar to 3-N-debenzoyl-2-deoxytaxol N-benzoyltransferase.
Os03t0143900-00	0.0333904	0.67715	4.34197	-3.52346	0.000425954	0.0118633	Plant disease resistance response protein family protein.
Os11t0430000-00	0.163199	3.34649	4.35794	-4.93265	8.11221e-07	6.26242e-05	Peptidase S10, serine carboxypeptidase family protein.
Os03t0250300-00	0.502181	10.4749	4.38259	-5.53089	3.18612e-08	3.99251e-06
Os05t0432200-00	5.27682	111.901	4.40641	-7.6802	1.59872e-14	8.52942e-12	Similar to Gibberellin-regulated protein 2 precursor.
Os06t0652100-00	0.10418	2.21151	4.40788	-5.39831	6.72724e-08	7.59229e-06	Uncharacterized conserved protein UCP015417, vWA domain containing protein.
Os04t0223901-00	6.62129	141.663	4.41921	-6.15027	7.73509e-10	1.54755e-07	Dimethylaniline monooxygenase, N-oxide-forming domain containing protein.
Os03t0745100-00	0.0602395	1.30589	4.43818	-4.29831	1.72108e-05	0.000846408	Similar to cytokinin-O-glucosyltransferase 1.
Os04t0400600-00	0.185183	4.03671	4.44615	-5.11074	3.20904e-07	2.91046e-05	Similar to OSIGBa0113L04.4 protein.
Os03t0404800-01	0.052072	1.13675	4.44826	-4.11857	3.81227e-05	0.00163108	NAD(P)-binding domain containing protein.
Os08t0427800-00	0.287565	6.31427	4.45665	-3.60156	0.000316314	0.00939054
Os12t0236225-00	0.0970525	2.13409	4.45871	-3.61819	0.000296668	0.00893607	Hypothetical conserved gene.
Os06t0595060-00	0.247678	5.56525	4.48991	-4.11047	3.94848e-05	0.00167915
Os01t0594900-01	7.56915	171.452	4.50153	-8.85222	0	0	Conserved hypothetical protein.
Os08t0223900-00	4.77435	109.244	4.5161	-8.55897	0	0	Similar to Cycloartenol synthase (EC 5.4.99.8) (Fragment).
Os09t0480900-01	0.189789	4.3549	4.52017	-4.80656	1.53549e-06	0.000107838	Similar to Anther-specific protein.
Os08t0413000-00	0.00804117	0.185703	4.52945	-2.99955	0.00270383	0.0497425	Similar to Valosin-containing protein (Fragment).
Os01t0772900-01	0.152015	3.60715	4.56858	-5.54055	3.01521e-08	3.85563e-06	Similar to Homocysteine S-methyltransferase 4 (EC 2.1.1.10) (S- methylmethionine:homocysteine methyltransferase 4) (SMM:Hcy S- methyltransferase 4) (ZmHMT-4).
Os03t0700600-01	0.0765686	1.82025	4.57124	-4.62045	3.8291e-06	0.000239485	Conserved hypothetical protein.
Os04t0316900-00	0.0456468	1.11849	4.61489	-4.81761	1.45288e-06	0.000102523
Os06t0730000-01	0.287328	7.17131	4.64146	-5.29956	1.16082e-07	1.2238e-05	Similar to Serine carboxypeptidase II-like protein.
Os07t0598400-01	0.662979	16.5566	4.6423	-7.25866	3.91021e-13	1.61984e-10	Glycoside hydrolase family 79, N-terminal protein.
Os06t0252800-01	0.165168	4.14331	4.64878	-5.65358	1.57144e-08	2.19672e-06	Similar to STF-1 (Fragment).
Os10t0330600-01	1.57011	39.635	4.65784	-8.76735	0	0	Glycoside hydrolase, family 35 protein.
Os10t0392900-00	0.0499383	1.26462	4.66241	-4.72978	2.24763e-06	0.000150463	Lipase, GDSL domain containing protein.
Os11t0111900-01	0.112275	2.87474	4.67832	-5.24697	1.54624e-07	1.54677e-05	BTB domain containing protein.
Os01t0177800-00	0.0393264	1.00883	4.68105	-4.75279	2.00626e-06	0.000135594
Os04t0346900-00	0.0352945	0.907624	4.68458	-4.57543	4.75245e-06	0.000285398
Os04t0599300-01	0.601219	15.9025	4.72522	-7.35848	1.86073e-13	8.40002e-11	Basic helix-loop-helix dimerisation region bHLH domain containing protein.
Os01t0930500-01	0.213955	5.71983	4.74059	-5.99042	2.09295e-09	3.73958e-07	Conserved hypothetical protein.
Os04t0510000-01	0.0660458	1.76828	4.74274	-3.87903	0.000104872	0.00380303	Conserved hypothetical protein.
Os06t0610800-01	1.66496	44.8604	4.75188	-8.448	0	0	Peptidase A1 domain containing protein.
Os05t0475550-00	0.209514	5.70186	4.76632	-5.18705	2.13654e-07	2.04435e-05	Non-protein coding transcript.
Os11t0644700-01	5.23342	144.318	4.78535	-7.87758	3.33067e-15	1.89161e-12	Plant disease resistance response protein family protein.
Os06t0674100-01	1.05727	29.5229	4.80342	-6.99009	2.74714e-12	8.87451e-10	Conserved hypothetical protein.
Os01t0903700-00	0.101234	2.85235	4.81639	-4.90441	9.37099e-07	7.02067e-05
Os08t0178900-00	0.224251	6.44789	4.84564	-6.58168	4.65163e-11	1.16995e-08	Homeodomain-like containing protein.
Os07t0655800-00	0.041838	1.25537	4.90715	-4.57594	4.74088e-06	0.000285361	Similar to Aspartic acid-rich protein.
Os07t0604400-00	0.227588	6.89003	4.92002	-6.42993	1.27661e-10	2.95736e-08	Similar to cDNA clone:J023025J18, full insert sequence.
Os11t0539600-00	0.00944936	0.287639	4.9279	-3.01926	0.00253392	0.0472674
Os02t0621300-01	3.41023	105.127	4.94613	-9.90432	0	0	Fatty acid hydroxylase domain containing protein.
Os07t0514600-00	0.0158428	0.489612	4.94974	-4.07697	4.56261e-05	0.0018901
Os04t0650200-01	0.970751	30.2549	4.96193	-7.88634	3.10862e-15	1.79444e-12	Lipase, GDSL domain containing protein.
Os04t0545700-00	0.0108321	0.343629	4.98747	-3.05797	0.00222842	0.0428548	Transferase family protein.
Os02t0499300-01	0.0189345	0.609648	5.00889	-4.13085	3.6143e-05	0.00155748	Conserved hypothetical protein.
Os10t0513400-00	0.0144354	0.470524	5.02659	-4.14796	3.35444e-05	0.00146365	Cytochrome P450 family protein.
Os10t0149000-00	0.0862701	2.83974	5.04076	-5.11037	3.21529e-07	2.91046e-05	Protein of unknown function DUF1210 family protein.
Os10t0191100-00	0.0132262	0.437814	5.04885	-3.09776	0.0019499	0.0387035	Similar to Protease inhibitor/seed storage/LTP family protein.
Os04t0415900-00	5.64226	186.781	5.04893	-9.13711	0	0	Bifunctional inhibitor/plant lipid transfer protein/seed storage domain containing protein.
Os01t0870450-00	0.27739	9.30396	5.06786	-4.15437	3.26188e-05	0.00143035
Os01t0827800-00	0.0184523	0.619185	5.0685	-3.10981	0.00187206	0.0374539	Similar to AT-rich element binding factor 3.
Os02t0479900-00	0.0310557	1.0434	5.07029	-4.18529	2.84807e-05	0.00128191
Os06t0228800-01	0.170988	5.81652	5.08819	-6.63563	3.23115e-11	8.49069e-09	Amino acid transporter, transmembrane domain containing protein.
Os09t0268600-01	0.00327271	0.113157	5.11169	-3.14045	0.00168687	0.0346529	Zinc finger, SWIM-type domain containing protein.
Os04t0140666-01	0.0554497	1.9215	5.11491	-5.5637	2.64109e-08	3.41905e-06	Similar to OSIGBa0124C14.6 protein.
Os02t0187000-00	0.0360364	1.25009	5.11643	-5.26875	1.37354e-07	1.41685e-05	Cytochrome P450 family protein.
Os08t0140700-00	0.268724	9.36902	5.1237	-6.42629	1.30753e-10	3.00919e-08	Similar to CsAtPR5.
Os12t0182100-00	0.0232519	0.848638	5.18973	-4.29731	1.72883e-05	0.000849032	Hypothetical conserved gene.
Os08t0270900-01	0.0138879	0.509846	5.19816	-3.19558	0.0013955	0.0300173	Zinc finger, C2H2-like domain containing protein.
Os07t0543100-00	0.109124	4.01527	5.20145	-5.88816	3.90525e-09	6.44207e-07	Similar to Beta-amylase (EC 3.2.1.2).
Os07t0153150-00	0.355525	14.1033	5.30994	-7.43809	1.02141e-13	4.86023e-11
Os02t0616100-03	0.206457	8.21315	5.31402	-6.9986	2.58527e-12	8.48467e-10	Similar to protein binding protein.
Os01t0929600-01	8.76834	371.123	5.40345	-9.82006	0	0	Conserved hypothetical protein.
Os05t0181200-01	0.0869241	3.69231	5.40862	-6.50739	7.64702e-11	1.83175e-08	Similar to Phytochrome P450-like protein.
Os01t0533400-01	0.470356	20.0052	5.41048	-8.75849	0	0	Glycoside hydrolase, family 35 protein.
Os03t0150500-01	0.0826653	3.61928	5.45228	-6.53876	6.20304e-11	1.53818e-08	Similar to Phosphate transporter 6.
Os03t0776200-00	0.023396	1.05171	5.49033	-5.49827	3.83526e-08	4.67292e-06
Os03t0234900-01	0.834006	37.5596	5.49298	-8.41704	0	0	Similar to Peroxidase (EC 1.11.1.7).
Os11t0291450-00	17.1629	877.934	5.67674	-8.80176	0	0	Non-protein coding transcript.
Os01t0112400-01	0.0252813	1.29816	5.68225	-4.7588	1.94751e-06	0.000132385	Major intrinsic protein family protein.
Os11t0645400-02	3.26376	172.689	5.7255	-7.39714	1.39222e-13	6.53638e-11	Plant disease resistance response protein family protein.
Os05t0499300-01	3.2102	175.323	5.77121	-10.6121	0	0	Similar to Peroxidase (EC 1.11.1.7).
Os05t0490600-00	0.0212992	1.165	5.77339	-5.52215	3.34884e-08	4.15209e-06	OSMYB5.
Os04t0354600-01	0.134751	7.58801	5.81536	-7.5904	3.19744e-14	1.65571e-11	Similar to Acyl CoA reductase-like protein.
Os01t0595001-00	0.143766	8.26608	5.84541	-6.49878	8.09739e-11	1.91359e-08	Hypothetical conserved gene.
Os03t0143100-00	0.00470817	0.288639	5.93795	-3.68814	0.000225896	0.00718542	Similar to SDD1 (STOMATAL DENSITY AND DISTRIBUTION); subtilase.
Os01t0877400-01	0.680816	41.7659	5.93892	-9.42837	0	0	Similar to Avr9 elicitor response-like protein.
Os04t0677200-01	0.0424177	2.69014	5.98687	-6.5305	6.55496e-11	1.60287e-08	Leucine-rich repeat, plant specific containing protein.
Os08t0496800-01	1.15443	77.0042	6.05968	-9.99021	0	0	Similar to RAFTIN1a protein (RAFTIN1a anther protein).
Os09t0554101-00	0.151963	10.7653	6.14652	-5.17798	2.24305e-07	2.11019e-05	Hypothetical conserved gene.
Os07t0186200-00	0.0218716	1.61273	6.2043	-6.60529	3.96729e-11	1.02718e-08	Similar to OSIGBa0148I18.4 protein.
Os11t0449600-01	0.0662645	4.91122	6.2117	-5.25586	1.47335e-07	1.4908e-05	Hypothetical protein.
Os12t0637900-00	0.0199238	1.58201	6.31112	-3.93638	8.27198e-05	0.00310195	CHCH domain containing protein.
Os03t0339300-02	0.0419004	3.48695	6.37886	-6.12753	8.92559e-10	1.76566e-07	Similar to Peroxidase (EC 1.11.1.7).
Os06t0574900-01	0.131903	11.3548	6.42769	-7.0899	1.34204e-12	4.67879e-10	Conserved hypothetical protein.
Os09t0256100-00	0.348314	31.3312	6.49107	-8.67907	0	0	Sulfotransferase family protein.
Os10t0149800-00	0.0148143	1.58274	6.73929	-4.228	2.35776e-05	0.00109527	Protein of unknown function DUF1210 family protein.
Os02t0504800-01	0.0197777	2.31812	6.87294	-3.01914	0.00253495	0.0472674	Similar to Delta-9 stearoyl-acyl carrier protein desaturase (EC 1.14.99.6) (Fragment).
Os01t0183500-01	0.156806	19.2412	6.93907	-8.25755	2.22045e-16	1.56373e-13	Cytochrome P450 family protein.
Os11t0187600-01	0.0130244	1.77075	7.087	-6.12312	9.17597e-10	1.80505e-07	Similar to Heat shock protein 70.
Os10t0484800-01	0.0407703	5.6281	7.10898	-7.74886	9.32587e-15	5.05204e-12	Polyketide synthase, type III domain containing protein.
Os06t0635300-00	0.118082	16.5889	7.13429	-8.86758	0	0	Conserved hypothetical protein.
Os11t0582500-01	0.927187	140.351	7.24196	-10.7217	0	0	Similar to Anther specific protein.
Os11t0549620-01	0.0366201	13.0131	8.47311	-9.1125	0	0	Similar to Purple acid phosphatase.
Os10t0150000-01	0.0677396	27.3561	8.65765	-8.83492	0	0	Hypothetical conserved gene.
Os04t0115200-01	0.00969692	4.10667	8.72623	-5.60319	2.10445e-08	2.81757e-06	Conserved hypothetical protein.
Os07t0442800-01	0.0096501	4.48199	8.85938	-5.6962	1.22509e-08	1.74648e-06	Conserved hypothetical protein.
Os03t0658800-01	0.00628686	3.15291	8.97013	-5.58254	2.37037e-08	3.09132e-06	Cytochrome P450 family protein.
Os10t0148000-01	0.307085	594.84	10.9196	-3.30864	0.00093751	0.0219346	Hypothetical conserved gene.

## Sheet: leaf
gene	non-transgenic lines	transgenic lines	log2(fold_change)	test_stat	p_value	q_value
Os01t0106400-01	0.398874	3.01788	2.91953	-4.02357	5.73232e-05	0.00568075	Similar to Isoflavone reductase homolog IRL (EC 1.3.1.-).
Os01t0107900-01	20.3127	105.227	2.37305	-3.9413	8.10401e-05	0.00716755	Conserved hypothetical protein.
Os12t0117700-01	64.0908	0.531069	-6.91507	7.20896	5.63771e-13	2.3186e-09	Hypothetical protein.
Os02t0602700-01	1.92224	0.0659881	-4.86444	5.419	5.99318e-08	4.62149e-05	Non-protein coding transcript.
Os05t0370700-01	1.37117	0.0548431	-4.64395	3.47412	0.000512531	0.0242378	Alpha/beta hydrolase family protein.
Os08t0504600-02	207.975	8.33726	-4.64069	3.54326	0.000395211	0.0207937	Similar to RNA recognition motif family protein.
Os09t0268600-01	0.550059	0.0224033	-4.6178	4.12918	3.64056e-05	0.00427784	Zinc finger, SWIM-type domain containing protein.
Os07t0147500-01	2425.29	99.0344	-4.61409	7.32283	2.42695e-13	1.19775e-09	Similar to Photosystem II 10 kDa polypeptide, chloroplast precursor.
Os09t0564450-01	0.406268	0.0167305	-4.60188	3.47411	0.000512553	0.0242378	Non-protein coding transcript.
Os02t0533700-01	15.1324	0.671135	-4.49489	6.72213	1.79086e-11	5.10239e-08	Conserved hypothetical protein.
Os05t0397300-02	130.491	6.95118	-4.23055	7.3458	2.04503e-13	1.19775e-09	Conserved hypothetical protein.
Os08t0200600-01	45.4834	2.43865	-4.22119	5.95762	2.55936e-09	4.21032e-06	Similar to NAC-domain containing protein 21/22 (ANAC021) (ANAC022). Splice isoform 2.
Os02t0193350-01	0.399935	0.0241066	-4.05227	3.59075	0.000329725	0.0185337	Hypothetical conserved gene.
Os01t0807266-00	49.0552	3.16141	-3.95576	6.33749	2.33543e-10	5.06691e-07	Hypothetical gene.
Os11t0699532-00	9.14236	0.604937	-3.91771	4.36922	1.24691e-05	0.00198508	Hypothetical gene.
Os05t0344200-03	96.5196	6.56923	-3.87703	6.3654	1.94778e-10	4.80635e-07	Conserved hypothetical protein.
Os11t0641500-01	0.910908	0.0624534	-3.86645	4.22394	2.40067e-05	0.00329105	Cupredoxin domain containing protein.
Os10t0544600-01	8.44078	0.594839	-3.82681	5.51606	3.46692e-08	3.41358e-05	Zinc finger, RING/FYVE/PHD-type domain containing protein.
Os11t0173100-01	0.761953	0.0538605	-3.8224	3.37478	0.000738752	0.030793	Non-protein coding transcript.
Os01t0590300-01	6.25624	0.457079	-3.77478	4.86046	1.17112e-06	0.000412835	Conserved hypothetical protein.
Os06t0579400-01	8.93777	0.679581	-3.7172	4.34292	1.40599e-05	0.00215492	Non-protein coding transcript.
Os08t0378000-02	97.1207	7.56301	-3.68275	5.34416	9.08355e-08	6.22627e-05	Conserved hypothetical protein.
Os04t0458600-01	0.789105	0.0623191	-3.66247	3.22424	0.0012631	0.0441043	Similar to Non-cell-autonomous protein pathway2.
Os09t0545300-01	17.8952	1.44642	-3.62902	4.84924	1.23935e-06	0.000424754	Small auxin-up RNA39., Negative regulator of auxin synthesis and transport., SAUR family protein.
Os09t0343600-01	7.09037	0.57762	-3.61767	5.11505	3.13652e-07	0.000157953	Non-protein coding transcript.
Os04t0493400-01	2.75157	0.225103	-3.6116	4.43725	9.11141e-06	0.00159456	Similar to Chitinase.
Os02t0704262-00	3.07297	0.252096	-3.60759	3.58907	0.000331858	0.0186112	Similar to cDNA, clone: J090082F19, full insert sequence.
Os02t0627100-01	1.24545	0.105162	-3.56599	4.40199	1.07263e-05	0.0017884	Similar to Phenylalanine ammonia-lyase (EC 4.3.1.5).
Os04t0499150-00	7.62354	0.646067	-3.56071	4.18722	2.82392e-05	0.00364833	Non-protein coding transcript.
Os09t0419100-03	2.7823	0.237249	-3.55181	4.36191	1.28931e-05	0.00202905	Hypothetical gene.
Os05t0355400-01	72.253	6.18865	-3.54536	6.32922	2.46405e-10	5.06691e-07	Rossmann-like alpha/beta/alpha sandwich fold domain containing protein.
Os01t0382400-01	6.33652	0.547389	-3.53305	4.67192	2.98398e-06	0.000783328	Similar to Pathogenesis-related protein PRB1-2 precursor.
Os06t0647500-01	229.59	19.9146	-3.52716	5.84883	4.95053e-09	7.18583e-06	DNA/RNA non-specific endonuclease, active site domain containing protein.
Os01t0944700-01	2.25546	0.196713	-3.51926	4.41007	1.03339e-05	0.00174657	Similar to Beta-1,3-glucanase precursor.
Os09t0306232-01	907.395	79.5013	-3.51268	3.49842	0.000468022	0.0233311	Hypothetical gene.
Os02t0139900-01	4.80665	0.42205	-3.50955	5.02404	5.05944e-07	0.000238293	Conserved hypothetical protein.
Os07t0640401-00	9.68394	0.851026	-3.50832	4.64382	3.42021e-06	0.00084397	Similar to Zinc finger CCHC domain-containing protein 10.
Os06t0272600-01	9.43117	0.836655	-3.49473	5.86491	4.49368e-09	6.93039e-06	Non-protein coding transcript.
Os04t0583200-01	6.72322	0.606269	-3.47112	4.88693	1.0242e-06	0.00037721	Conserved hypothetical protein.
Os08t0531900-01	1.90002	0.171567	-3.46917	4.13584	3.53665e-05	0.00421992	Similar to MADS box transcription factor-like protein (MADS-box protein AGL72).
Os08t0130100-01	15.5764	1.41169	-3.46387	5.38909	7.08157e-08	5.13955e-05	Zinc finger, LSD1-type domain containing protein.
Os02t0594166-01	1.13218	0.104579	-3.43645	3.76131	0.000169023	0.0119507	Conserved hypothetical protein.
Os03t0604566-01	14.7746	1.36788	-3.43311	5.5203	3.38414e-08	3.41358e-05	Conserved hypothetical protein.
Os01t0757200-01	7.10765	0.681356	-3.38289	5.34588	8.99797e-08	6.22627e-05	Similar to GA 2-oxidase 4.
Os02t0531300-01	0.678148	0.0671254	-3.33667	3.29018	0.00100123	0.0378351	Conserved hypothetical protein.
Os03t0185800-01	2.6664	0.264107	-3.3357	3.84528	0.000120413	0.00937326	Conserved hypothetical protein.
Os01t0543600-01	8.86422	0.885588	-3.32329	5.63234	1.7778e-08	2.08901e-05	Cytochrome P450 family protein.
Os11t0425900-00	69.2241	7.02012	-3.30171	3.61669	0.000298395	0.0174483
Os10t0558700-01	6.6018	0.676854	-3.28594	4.95786	7.12738e-07	0.000298093	Similar to Oxidoreductase, 2OG-Fe oxygenase family protein, expressed.
Os02t0684400-01	9.04151	0.931627	-3.27874	3.98593	6.72169e-05	0.0063307	Conserved hypothetical protein.
Os11t0513000-01	0.727285	0.0753603	-3.27065	3.75507	0.000173294	0.0121483	Hypothetical conserved gene.
Os05t0367900-01	1.05504	0.112692	-3.22684	3.17591	0.00149369	0.0488836	Harpin-induced 1 domain containing protein.
Os04t0220501-00	22.6524	2.4255	-3.22331	5.70856	1.13934e-08	1.40572e-05	Hypothetical conserved gene.
Os01t0681700-00	10.78	1.17124	-3.20225	4.62239	3.7935e-06	0.000900081	Hypothetical conserved gene.
Os03t0596400-01	0.797503	0.0878791	-3.1819	4.02655	5.66016e-05	0.00563186	Region of unknown function XH domain containing protein.
Os01t0784000-01	101.777	11.387	-3.15996	4.58645	4.50854e-06	0.000975902	Hypothetical protein.
Os01t0888900-01	6.77729	0.7584	-3.15968	4.14404	3.4124e-05	0.00412767	Conserved hypothetical protein.
Os11t0598500-00	3.42054	0.387517	-3.14189	5.11752	3.09585e-07	0.000157953	NB-ARC domain containing protein.
Os05t0150766-00	11.7017	1.33627	-3.13044	4.44583	8.75516e-06	0.00157695	Non-protein coding gene.
Os04t0580800-01	2.375	0.271256	-3.1302	3.96113	7.45969e-05	0.0068176	Zinc finger, RING/FYVE/PHD-type domain containing protein.
Os07t0299701-00	93.9774	10.9794	-3.09752	5.2659	1.39504e-07	8.60598e-05	Non-protein coding transcript.
Os11t0177750-00	6.39629	0.752356	-3.08775	3.47681	0.00050742	0.0242378	Hypothetical gene.
Os01t0137800-01	8.64326	1.02838	-3.0712	5.47936	4.26861e-08	3.77966e-05	Non-protein coding transcript.
Os06t0698822-01	2.50893	0.298766	-3.06998	4.37504	1.21411e-05	0.00194542	Conserved hypothetical protein.
Os05t0365200-01	18.8432	2.2491	-3.06663	5.44191	5.2713e-08	4.27475e-05	Conserved hypothetical protein.
Os04t0200700-01	3.16659	0.387794	-3.02957	4.79806	1.60209e-06	0.000506835	Conserved hypothetical protein.
Os04t0674500-01	4.18649	0.516395	-3.01919	4.69031	2.72793e-06	0.000739719	Hypothetical protein.
Os06t0166400-01	117.947	14.6102	-3.0131	5.47853	4.2888e-08	3.77966e-05	Similar to TINY-like protein (AP2 domain containing protein RAP2.10) (Fragment).
Os01t0690050-00	8.18539	1.02006	-3.0044	3.45893	0.000542322	0.025185
Os11t0235400-00	18.5523	2.34002	-2.987	3.73745	0.000185893	0.0125856	Hypothetical genes.
Os02t0668500-01	22.847	2.88599	-2.98486	4.7824	1.73218e-06	0.000514979	Cellular retinaldehyde-binding/triple function, C-terminal domain containing protein.
Os08t0396200-01	69.8501	9.05041	-2.94821	5.21252	1.86289e-07	0.000106904	Hypothetical gene.
Os02t0626100-03	77.143	10.1086	-2.93195	4.78329	1.72446e-06	0.000514979	Similar to Phenylalanine ammonia-lyase.
Os03t0272900-02	66.5638	8.78575	-2.9215	5.2349	1.65075e-07	9.93507e-05	DVL family protein.
Os10t0369900-01	0.939217	0.125114	-2.90821	3.53169	0.000412915	0.0214507	Similar to Myo-inositol-1-phosphate synthase.
Os03t0596450-00	3.50278	0.467201	-2.90638	4.06661	4.77019e-05	0.00504493	Hypothetical conserved gene.
Os09t0449650-00	7.61471	1.01584	-2.90612	4.16087	3.17039e-05	0.0038729	Conserved hypothetical protein.
Os04t0517500-01	11.2911	1.5128	-2.8999	4.73045	2.24026e-06	0.00062113	Similar to Phosphoenolpyruvate carboxylase kinase 4.
Os10t0557900-00	38.8842	5.21126	-2.89948	4.67804	2.89635e-06	0.000768497	Peptidase M10A and M12B, matrixin and adamalysin family protein.
Os05t0524100-01	22.9333	3.14213	-2.86763	4.86753	1.13e-06	0.000404115	Conserved hypothetical protein.
Os11t0537400-01	4.43711	0.614282	-2.85265	3.70729	0.000209486	0.0136034	Similar to respiratory burst oxidase-like protein D.
Os01t0337160-00	29.4915	4.12548	-2.83767	4.93235	8.12454e-07	0.000328658	Conserved hypothetical protein.
Os03t0803800-01	60.6466	8.55284	-2.82595	5.15931	2.47868e-07	0.000132965	Conserved hypothetical protein.
Os02t0659500-01	1.17812	0.166743	-2.82079	3.46752	0.000525284	0.0246393	Zinc finger, C2H2-type domain containing protein.
Os01t0924100-01	11.5857	1.66927	-2.79505	4.39594	1.10294e-05	0.00182658	Non-protein coding transcript.
Os07t0277200-01	4.36628	0.62984	-2.79335	3.67354	0.000239212	0.0148969	Conserved hypothetical protein.
Os04t0635600-00	56.1533	8.1061	-2.79229	4.30404	1.6771e-05	0.00249281	Similar to H0410G08.8 protein.
Os01t0137700-01	9.50244	1.3776	-2.78614	4.78976	1.66984e-06	0.000514979	Conserved hypothetical protein.
Os02t0147800-01	137.586	20.0078	-2.7817	3.51191	0.000444893	0.0224503	Hypothetical conserved gene.
Os11t0602750-01	0.543218	0.0790441	-2.7808	3.5937	0.000326013	0.0184935	Hypothetical gene.
Os07t0187000-01	0.829621	0.120772	-2.78017	3.47919	0.000502932	0.0241917	Hypothetical conserved gene.
Os03t0817700-00	11.7822	1.72856	-2.76897	4.6584	3.18681e-06	0.000825104	Hypothetical conserved gene.
Os03t0753100-01	4.30467	0.637549	-2.7553	4.07294	4.64228e-05	0.00493762	Transcription factor, MADS-box domain containing protein.
Os01t0846400-01	11.0756	1.65077	-2.74617	4.9284	8.29057e-07	0.000329965	Conserved hypothetical protein.
Os12t0405300-01	22.2706	3.32012	-2.74583	4.97356	6.57329e-07	0.000284566	Conserved hypothetical protein.
Os06t0268900-01	6.03409	0.900549	-2.74426	3.45133	0.00055783	0.025729	Non-protein coding transcript.
Os03t0203451-00	8.97738	1.34325	-2.74056	3.83007	0.000128105	0.00972593	Non-protein coding transcript.
Os05t0129300-02	60.9375	9.17666	-2.73129	3.26398	0.00109858	0.0402206	Basic/leucine zipper protein.
Os02t0502900-00	6.61452	0.99732	-2.72951	3.21445	0.00130697	0.0448553
Os06t0637800-01	55.3782	8.35935	-2.72786	4.5428	5.55117e-06	0.0011511	Hypothetical gene.
Os05t0170950-00	129.99	19.7622	-2.71759	4.91596	8.83487e-07	0.000335399	Similar to Plastid phosphoenolpyruvate/phosphate translocator.
Os01t0222600-01	175.799	26.9092	-2.70776	4.92521	8.42693e-07	0.000330068	Conserved hypothetical protein.
Os11t0671000-01	965.527	147.998	-2.70574	4.04633	5.20268e-05	0.00530502	Similar to Dormancy-associated protein.
Os12t0185900-01	9.78741	1.50575	-2.70044	4.87899	1.06628e-06	0.000386934	Conserved hypothetical protein.
Os06t0692100-01	1.316	0.202499	-2.70017	3.94305	8.04529e-05	0.0071412	Protein kinase, core domain containing protein.
Os01t0108400-00	4.47988	0.697716	-2.68275	3.56133	0.000368976	0.0197502	Hypothetical conserved gene.
Os12t0428000-01	1.73425	0.273255	-2.66599	3.5288	0.000417444	0.0215951	Rhodanese-like domain containing protein.
Os03t0280400-01	643.946	101.546	-2.6648	4.63228	3.61665e-06	0.000874946	Conserved hypothetical protein CHP01589, plant domain containing protein.
Os06t0129100-01	33.8893	5.39211	-2.65191	4.81155	1.49763e-06	0.000486257	Short-chain dehydrogenase/reductase SDR family protein.
Os02t0132300-01	11.5845	1.8492	-2.64722	3.56504	0.000363803	0.019663	Similar to Erythrocyte membrane protein PFEMP3 (Fragment).
Os01t0264000-01	2.30189	0.370078	-2.63692	3.78486	0.000153797	0.0110968	Zinc finger, Dof-type family protein.
Os04t0540900-01	1.59001	0.256023	-2.63469	3.48377	0.000494406	0.0239215	Serine/threonine protein kinase domain containing protein.
Os04t0175600-01	10.6495	1.7203	-2.63005	4.35816	1.31161e-05	0.00204843	Similar to 0-methyltransferase (EC 2.1.1.6) (Fragment).
Os01t0728900-01	5.05382	0.827368	-2.61077	4.07307	4.63965e-05	0.00493762	Hypothetical conserved gene.
Os11t0551350-01	44.5269	7.29114	-2.61046	4.6532	3.26819e-06	0.0008301	Hypothetical conserved gene.
Os11t0700500-01	20.888	3.42326	-2.60923	4.54316	5.54167e-06	0.0011511	Similar to Snapdragon myb protein 305 homolog.
Os02t0223300-01	10.4863	1.72777	-2.60153	3.41159	0.000645847	0.0284588	Conserved hypothetical protein.
Os03t0285300-01	20.6282	3.39928	-2.60132	3.97099	7.15756e-05	0.00664291	Conserved hypothetical protein.
Os04t0220500-00	19.3688	3.24231	-2.57864	3.94553	7.96249e-05	0.0071412
Os01t0227700-01	0.932469	0.156223	-2.57745	3.20655	0.00134336	0.0455076	Cytochrome P450 family protein.
Os11t0443700-01	26.9882	4.53501	-2.57315	4.53956	5.63723e-06	0.00115318	Similar to Short chain alcohol dehydrogenase-like.
Os02t0766600-01	73.4835	12.4075	-2.56621	4.69106	2.7179e-06	0.000739719	Protein of unknown function DUF1685 family protein.
Os06t0648600-01	7.72034	1.30704	-2.56236	3.77424	0.000160498	0.0115129	Hypothetical gene.
Os03t0257600-01	9.03735	1.53256	-2.55996	4.39147	1.12586e-05	0.00185211	Hypothetical conserved gene.
Os03t0219800-03	41.5178	7.07147	-2.55365	3.87764	0.000105477	0.008478	Hypothetical protein.
Os04t0201500-00	3.97837	0.678338	-2.5521	3.47966	0.000502047	0.0241917	Similar to amino acid permease.
Os06t0493100-01	124.303	21.2165	-2.5506	4.59988	4.2273e-06	0.000948299	Conserved hypothetical protein.
Os08t0355500-02	82.8568	14.1883	-2.54592	3.49491	0.000474221	0.0234037	Hypothetical conserved gene.
Os11t0246200-00	32.1199	5.50519	-2.5446	4.57472	4.76854e-06	0.0010232	Kelch-type beta propeller domain containing protein.
Os11t0444700-01	16.9161	2.90328	-2.54264	4.26301	2.01687e-05	0.0028439	Octicosapeptide/Phox/Bem1p domain containing protein.
Os09t0281700-01	121.673	21.087	-2.52858	4.6302	3.65305e-06	0.00087517	Similar to Ras-related protein RGP1 (GTP-binding regulatory protein RGP1).
Os01t0344620-01	0.35418	0.0618333	-2.51803	3.38669	0.000707415	0.0298907	Hypothetical gene.
Os03t0731100-01	651.222	115.073	-2.5006	4.43984	9.00245e-06	0.00158675	Photosystem I reaction centre subunit N family protein.
Os04t0282400-01	133.387	23.5701	-2.50059	4.59277	4.37392e-06	0.000955139	Similar to FPF1 protein-like (RAA1).
Os04t0520700-01	19.9355	3.5246	-2.49981	4.34384	1.40016e-05	0.00215492	Protein of unknown function DUF584 family protein.
Os04t0634800-01	14.6051	2.58674	-2.49726	3.7143	0.000203769	0.0133374	Conserved hypothetical protein.
Os12t0611100-01	13.0212	2.31158	-2.49391	4.50158	6.74486e-06	0.00131052	Similar to Receptor-like serine/threonine kinase.
Os06t0277600-01	3.54239	0.63479	-2.48037	3.66265	0.000249615	0.0152463	Conserved hypothetical protein.
Os09t0322400-01	6.0463	1.08358	-2.48025	3.57197	0.000354301	0.0193423	Hypothetical protein.
Os01t0113000-00	2.86822	0.519781	-2.46418	4.06593	4.78406e-05	0.00504493	Hypothetical conserved gene.
Os02t0631601-00	156.632	28.413	-2.46276	4.51957	6.19662e-06	0.00123313	Similar to predicted protein.
Os09t0271100-01	1562.4	283.42	-2.46275	3.63425	0.000278787	0.016657	Hypothetical protein.
Os02t0498100-01	26.6623	4.90176	-2.44343	3.88529	0.000102206	0.0083511	Conserved hypothetical protein.
Os02t0602300-02	362.921	66.9169	-2.43921	4.13527	3.54542e-05	0.00421992	Similar to Myelin transcription factor 1 (MYT1) (MYTI) (Proteolipid protein binding protein) (PLPB1).
Os02t0613400-01	153.473	28.4434	-2.43182	4.42059	9.84308e-06	0.00167509	Prefoldin domain containing protein.
Os07t0559100-01	7.53481	1.39652	-2.43174	3.3945	0.000687545	0.0294036	Hypothetical conserved gene.
Os03t0617500-02	6.2334	1.16726	-2.41689	4.01882	5.84903e-05	0.00568231	Cyclin D domain containing protein.
Os05t0596600-02	189.013	35.3956	-2.41684	3.90851	9.28676e-05	0.00787491	Similar to SMC5 protein.
Os12t0117500-01	31.8927	6.0064	-2.40865	4.37808	1.19732e-05	0.00193105	Similar to RPT2-like protein.
Os11t0118300-01	30.1744	5.68368	-2.40843	4.42807	9.50809e-06	0.00162932	NPH3 domain containing protein.
Os05t0491200-02	10.5288	1.98512	-2.40704	3.73867	0.000184999	0.0125759	Similar to SNF1 kinase complex anchoring protein (Fragment).
Os02t0687600-01	4.32085	0.816009	-2.40466	4.20621	2.59685e-05	0.00346691	Hypothetical protein.
Os11t0442380-01	3.31352	0.628335	-2.39876	3.71188	0.000205728	0.0134272	Hypothetical gene.
Os11t0444900-01	353.336	67.1303	-2.396	4.18089	2.90371e-05	0.00368373	Octicosapeptide/Phox/Bem1p domain containing protein.
Os03t0168800-00	8.93656	1.70006	-2.39414	3.92365	8.72172e-05	0.00757807	Hypothetical conserved gene.
Os01t0913100-01	2.86851	0.549427	-2.3843	3.2325	0.00122713	0.0434662	Protein of unknown function DUF538 family protein.
Os03t0216000-01	1.63794	0.314368	-2.38136	3.37197	0.000746335	0.0309522	Similar to Zinc-finger protein KNUCKLES.
Os01t0558700-01	5.49442	1.05626	-2.379	3.28677	0.00101345	0.0381218	Conserved hypothetical protein.
Os11t0598300-00	12.3377	2.39244	-2.36652	4.24946	2.14289e-05	0.00298746	NB-ARC domain containing protein.
Os06t0492000-01	11.3915	2.21027	-2.36566	3.6802	0.000233055	0.0147081	Similar to CDP-diacylglycerol--inositol 3-phosphatidyltransferase 1 (EC 2.7.8.11) (Phosphatidylinositol synthase 1) (PtdIns synthase 1) (PI synthase 1) (AtPIS1).
Os11t0626700-01	29.4421	5.71568	-2.36488	4.05674	4.97629e-05	0.00513786	Hypothetical protein.
Os01t0975300-01	12.1327	2.35821	-2.36314	4.08377	4.43113e-05	0.00479233	Similar to Myb factor protein.
Os08t0215300-01	180.974	35.2163	-2.36147	3.84113	0.000122468	0.00950323	Conserved hypothetical protein.
Os03t0831300-01	56.1236	11.1234	-2.33501	4.30009	1.70727e-05	0.00249281	Protein of unknown function DUF789 family protein.
Os03t0656100-01	383.004	75.9484	-2.33427	4.27756	1.88953e-05	0.00272667	Conserved hypothetical protein.
Os02t0689900-01	4.53618	0.901168	-2.33161	3.83371	0.000126225	0.00967305	TGF-beta receptor, type I/II extracellular region family protein.
Os02t0654700-01	12.1292	2.4162	-2.32767	3.92593	8.63968e-05	0.00753331	APETALA2 (AP2) gene 59., Abiotic stress., AP2/ERF family protein.
Os02t0137700-01	109.804	22.0376	-2.31689	4.11456	3.87915e-05	0.00437086	NAD(P)-binding domain containing protein.
Os10t0465175-00	8.62847	1.73617	-2.31319	3.416	0.00063549	0.0281465	Hypothetical gene.
Os10t0364700-01	3.16358	0.637311	-2.31149	3.26174	0.00110733	0.0404207	Hypothetical protein.
Os02t0437300-01	55.6925	11.2699	-2.30501	4.21094	2.54309e-05	0.00342914	Conserved hypothetical protein.
Os02t0580900-02	9.33949	1.89353	-2.30227	3.39622	0.000683226	0.0292965	Similar to peptide transporter PTR2.
Os04t0638700-01	272.172	55.3681	-2.29739	4.16694	3.0871e-05	0.00381882	Conserved hypothetical protein.
Os09t0437500-01	126.97	25.8857	-2.29427	4.20141	2.65263e-05	0.00350034	Dormancyauxin associated family protein.
Os02t0626400-03	82.6249	16.9203	-2.28782	3.96428	7.36169e-05	0.00675305	Similar to Phenylalanine ammonia-lyase.
Os09t0242800-01	16.6556	3.41794	-2.28481	3.86265	0.000112165	0.00887107	Zinc finger, RING/FYVE/PHD-type domain containing protein.
Os11t0692400-01	12.1217	2.49067	-2.28299	3.49728	0.000470031	0.0233437	Conserved hypothetical protein.
Os05t0494800-01	626.388	128.803	-2.28189	4.02115	5.79155e-05	0.00568231	Conserved hypothetical protein.
Os03t0591000-02	11.7987	2.43178	-2.27855	3.29801	0.000973723	0.0372578	Conserved hypothetical protein.
Os07t0213400-01	192.082	39.6223	-2.27733	4.07918	4.51953e-05	0.00484886	Conserved hypothetical protein.
Os03t0782200-01	2.53823	0.523976	-2.27625	3.21537	0.00130276	0.0448353	Conserved hypothetical protein.
Os05t0195200-01	27.5685	5.71974	-2.269	4.13451	3.55708e-05	0.00421992	Zinc finger, CCCH-type domain containing protein.
Os07t0506700-01	61.155	12.7991	-2.25643	4.12008	3.78746e-05	0.00435831	WD40 repeat-like domain containing protein.
Os01t0727800-01	18.6706	3.91368	-2.25417	3.94387	8.01786e-05	0.0071412	Peptidase S8, subtilisin-related domain containing protein.
Os05t0449900-01	60.5251	12.747	-2.24738	4.13212	3.59432e-05	0.0042437	Homeodomain-like containing protein.
Os01t0552500-01	44.7286	9.52139	-2.23195	4.11987	3.79091e-05	0.00435831	Conserved hypothetical protein.
Os02t0799700-01	39.2326	8.35563	-2.23123	4.00892	6.09963e-05	0.00587947	Conserved hypothetical protein.
Os03t0823400-01	107.607	22.989	-2.22675	4.11172	3.92722e-05	0.00439631	Similar to Bowman-Birk type trypsin inhibitor (WTI).
Os11t0466966-01	5.66391	1.21473	-2.22116	3.7408	0.000183433	0.0125733	Conserved hypothetical protein.
Os08t0395700-01	3.83551	0.822787	-2.22083	3.38545	0.000710625	0.0299088	Conserved hypothetical protein.
Os05t0420000-01	16.3775	3.53251	-2.21295	3.65861	0.000253585	0.0153746	Conserved hypothetical protein.
Os01t0924200-01	34.9967	7.58635	-2.20574	3.36511	0.000765129	0.0315197	Conserved hypothetical protein.
Os01t0235900-00	256.186	55.6128	-2.20371	3.8712	0.000108303	0.00864878	Thioredoxin fold domain containing protein.
Os09t0409950-01	147.144	31.9798	-2.202	4.06468	4.80994e-05	0.00505064	Hypothetical conserved gene.
Os07t0192900-00	52.7133	11.6729	-2.175	4.02109	5.79289e-05	0.00568231	Hypothetical conserved gene.
Os03t0723250-00	159.809	35.4264	-2.17346	3.67942	0.000233764	0.0147152	Non-protein coding gene.
Os09t0472100-01	1.54229	0.342577	-2.17058	3.21257	0.00131552	0.0450283	Similar to ABC transporter.
Os01t0572300-01	3.14164	0.708977	-2.14771	3.30365	0.000954357	0.0368822	Zinc finger, C2H2-type domain containing protein.
Os06t0125800-01	211.623	47.8095	-2.14612	3.72406	0.000196044	0.0130393	Zinc finger, RING/FYVE/PHD-type domain containing protein.
Os04t0648700-01	99.8121	22.6152	-2.14192	3.80112	0.000144045	0.0105161	DNA repair nuclease, XPF-type/Helicase domain containing protein.
Os07t0405100-01	219.561	49.8397	-2.13925	3.60738	0.000309301	0.0179584	Similar to F-box-like/WD-repeat protein ebi.
Os05t0341450-01	2.64921	0.604024	-2.13289	3.48535	0.000491501	0.0239215	Hypothetical conserved gene.
Os12t0242800-01	8.45806	1.93552	-2.1276	3.38992	0.000699122	0.029744	TRAM, LAG1 and CLN8 homology domain containing protein.
Os07t0446600-01	1.71149	0.392261	-2.12537	3.17091	0.0015196	0.0493391	Hypothetical protein.
Os03t0641700-02	438.436	100.53	-2.12474	3.42834	0.000607294	0.0272465	Conserved hypothetical protein.
Os06t0241200-01	3.98887	0.91551	-2.12333	3.51707	0.000436342	0.0222134	Hypothetical protein.
Os09t0514900-01	56.3156	12.9307	-2.12273	3.89647	9.76042e-05	0.00813676	Basic helix-loop-helix, Nulp1-type domain containing protein.
Os11t0676050-00	27.1305	6.2747	-2.1123	3.4822	0.000497312	0.024015
Os01t0187500-01	41.2622	9.59696	-2.10417	3.89419	9.85287e-05	0.00818618	Similar to Zfwd3 protein (Fragment).
Os05t0521300-04	43.0888	10.0592	-2.0988	3.24898	0.00115818	0.0417217	Similar to Kinesin heavy chain (Fragment).
Os11t0256900-01	18.4174	4.32923	-2.08889	3.72503	0.00019529	0.0130393	SAM dependent carboxyl methyltransferase family protein.
Os11t0639000-00	102.336	24.0685	-2.0881	3.86324	0.000111893	0.00887107	Similar to Phyb1.
Os01t0125700-01	36.3001	8.56214	-2.08393	3.82933	0.000128491	0.00972593	Conserved hypothetical protein.
Os03t0327800-01	7.20696	1.70249	-2.08174	3.53229	0.000411975	0.0214471	NAC-domain containing protein 29 (ANAC029) (NAC2) (NAC-LIKE, ACTIVATED BY AP3/PI protein) (NAP).
Os11t0490900-01	9.52962	2.26224	-2.07467	3.44276	0.000575807	0.0263611	Similar to WRKY transcription factor 72.
Os05t0147150-01	177.123	42.061	-2.0742	3.82177	0.000132496	0.00990747	Hypothetical conserved gene.
Os01t0726801-01	37.3712	8.91695	-2.0673	3.36339	0.00076992	0.0316642	Non-protein coding transcript.
Os07t0497100-01	250.591	59.8044	-2.06701	3.6062	0.000310717	0.0179983	Similar to Chromodomain helicase-DNA-binding protein 5 (CHD-5).
Os03t0847800-01	27.3127	6.52037	-2.06654	3.51831	0.000434299	0.0221879	Conserved hypothetical protein.
Os07t0629000-01	11.2207	2.69397	-2.05836	3.40493	0.0006618	0.0287856	Similar to P-type R2R3 Myb protein (Fragment).
Os08t0215200-01	73.8405	17.75	-2.0566	3.66943	0.000243091	0.0150716	Transposon, En/Spm-like domain containing protein.
Os03t0111400-01	45.4387	10.9609	-2.05155	3.55261	0.000381425	0.0203284	Heavy metal transport/detoxification protein domain containing protein.
Os02t0755550-00	31.8162	7.68281	-2.05006	3.68298	0.000230522	0.014623	Hypothetical gene.
Os10t0568200-01	4.60521	1.11475	-2.04655	3.16655	0.00154256	0.0497573	Chaperonin Cpn60/TCP-1 family protein.
Os03t0661800-01	28.1387	6.8163	-2.04549	3.79385	0.000148329	0.0107652	PDZ/DHR/GLGF domain containing protein.
Os02t0438601-02	3.19919	0.783356	-2.02997	3.27117	0.00107105	0.0396241	Similar to Kinesin heavy chain (Fragment).
Os03t0375200-00	10.0312	2.45979	-2.02789	3.54247	0.000396398	0.0208118	Hypothetical conserved gene.
Os07t0663800-01	6.40157	1.57023	-2.02744	3.17542	0.00149622	0.0489015	Short-chain dehydrogenase/reductase SDR domain containing protein.
Os10t0433700-01	7.21783	1.77294	-2.02542	3.63522	0.000277743	0.016657	Conserved hypothetical protein.
Os03t0347300-01	61.9604	15.2708	-2.02057	3.59082	0.000329636	0.0185337	Zinc finger, CW-type domain containing protein.
Os11t0471100-01	527.913	130.187	-2.01971	3.54417	0.000393856	0.0207667	Hypothetical gene.
Os01t0678950-01	2.00143	0.494504	-2.01697	3.20674	0.00134247	0.0455076	Non-protein coding transcript.
Os11t0544600-01	262.301	64.8408	-2.01625	3.38806	0.000703896	0.029793	Conserved hypothetical protein.
Os07t0469200-02	107.422	26.6592	-2.01058	3.7216	0.000197965	0.0131317	Similar to predicted protein.
Os04t0530300-01	131.424	32.77	-2.00378	3.64611	0.000266244	0.016024	Conserved hypothetical protein.
Os11t0557000-01	34.6544	8.6482	-2.00257	3.53517	0.000407509	0.0212594	Phytosulfokine family protein.
Os08t0191000-01	4.36711	17.4749	2.00053	-3.66542	0.00024693	0.0151574	Auxin efflux carrier domain containing protein.
Os12t0145700-01	1.18929	4.7727	2.0047	-3.31844	0.000905203	0.0355681	Pyruvate kinase family protein.
Os02t0224200-01	2.77348	11.236	2.01836	-3.63172	0.000281533	0.0166998	Similar to Ser/Thr specific protein phosphatase 2A B regulatory subunit beta isoform.
Os02t0554300-01	2.04484	8.30003	2.02113	-3.58292	0.000339771	0.0188833	Similar to SAC1-like protein AtSAC1b (SAC domain protein 6).
Os02t0831600-01	1.00391	4.07514	2.02121	-3.48782	0.000486982	0.0237892	AGO1 homologous protein.
Os07t0283125-00	3.48944	14.1649	2.02126	-3.66439	0.000247925	0.0151806	Similar to lectin-like receptor kinase 7.
Os03t0711800-01	1.94875	7.94532	2.02756	-3.48736	0.000487816	0.0237892	Similar to IRE homolog 1 (Fragment).
Os10t0577600-01	0.773535	3.15384	2.02757	-3.4043	0.00066334	0.0287856	Similar to PLU-1 protein.
Os08t0537600-01	0.451961	1.84774	2.03149	-3.22156	0.00127493	0.0442479	Arf GTPase activating protein family protein.
Os07t0689950-00	1.61157	6.59008	2.03183	-3.60547	0.000311594	0.0180068	Hypothetical conserved gene.
Os01t0715400-02	0.914848	3.76142	2.03967	-3.42633	0.0006118	0.0273989	Glycoside hydrolase family 13 protein.
Os09t0426800-01	0.64551	2.65618	2.04084	-3.23639	0.00121051	0.0431032	Similar to Glossy1 protein.
Os12t0638300-01	4.78493	19.8519	2.05271	-3.77284	0.000161398	0.0115141	Similar to Peptide transporter.
Os04t0692900-01	1.15342	4.78713	2.05325	-3.26821	0.0010823	0.0398608	Hypothetical protein.
Os05t0315100-00	6.99828	29.0599	2.05396	-3.81146	0.000138146	0.0102678	Pentatricopeptide repeat domain containing protein.
Os01t0851700-01	30.2787	125.856	2.0554	-3.52492	0.000423607	0.0218224	Similar to Cytosolic starch phosphorylase (Fragment).
Os07t0661500-00	6.55195	27.4074	2.06457	-3.76522	0.000166402	0.0117992	Hypothetical conserved gene.
Os03t0121901-00	1.31902	5.54032	2.07051	-3.1889	0.00142817	0.0473675	Similar to Endoribonuclease Dicer homolog 1.
Os01t0187900-01	3.33335	14.0185	2.07228	-3.64612	0.000266226	0.016024	Similar to Transcription factor MYBS2.
Os08t0111200-01	7.29798	30.7201	2.07362	-3.20385	0.00135605	0.045605	Beta-glucosidase, GBA2 type domain containing protein.
Os09t0520000-01	3.8633	16.2924	2.07629	-3.50384	0.000458596	0.0230945	Hypothetical protein.
Os12t0256900-01	0.635529	2.68959	2.08136	-3.19249	0.00141054	0.0469723	Pentatricopeptide repeat domain containing protein.
Os08t0547500-02	1.08994	4.61566	2.08229	-3.2771	0.00104881	0.0390353	Hypothetical conserved gene.
Os10t0214132-00	1520.68	6451.27	2.08487	-3.63306	0.000280084	0.0166941	Similar to ribosomal protein L2.
Os12t0110000-00	1.9174	8.13695	2.08534	-3.82513	0.000130705	0.00983316	Regulatory associated protein of TOR family protein.
Os06t0301350-00	4.61276	19.6106	2.08793	-3.83457	0.000125784	0.00966927	Similar to predicted protein.
Os06t0506100-01	0.652204	2.77305	2.08808	-3.40971	0.000650318	0.0286047	Pentatricopeptide repeat domain containing protein.
Os05t0354300-01	0.630985	2.68372	2.08856	-3.43015	0.000603244	0.0272133	Similar to Meiotic check point regulator-like protein.
Os03t0795400-00	0.61119	2.60437	2.09124	-3.27734	0.00104789	0.0390353	Hypothetical conserved gene.
Os03t0371300-00	12.1186	51.7122	2.09328	-3.73873	0.000184953	0.0125759	Similar to Cytochrome P450 CYP709E4.
Os07t0678600-01	9.0504	39.042	2.10897	-3.4081	0.000654163	0.028714	Similar to Serine/threonine protein kinase.
Os01t0668300-01	1.12612	4.87116	2.1129	-3.66626	0.000246121	0.0151574	Conserved hypothetical protein.
Os08t0137300-01	0.430121	1.86652	2.11754	-3.19071	0.00141923	0.0471981	Protein of unknown function DUF604 family protein.
Os05t0463500-01	1.99493	8.70909	2.12618	-3.59568	0.000323545	0.0184152	Conserved hypothetical protein.
Os04t0488500-01	1.51639	6.62491	2.12726	-3.73251	0.00018958	0.012714	Pentatricopeptide repeat domain containing protein.
Os01t0701900-01	0.799615	3.49484	2.12785	-3.43348	0.00059589	0.0271295	Similar to Phosphatidylinositol transfer-like protein III.
Os06t0245700-00	3.80588	16.6432	2.12863	-3.93805	8.21469e-05	0.00721937	Similar to predicted protein.
Os03t0115300-00	1.52725	6.68019	2.12895	-3.4972	0.000470167	0.0233437	Similar to predicted protein.
Os12t0197200-01	0.291963	1.27707	2.12898	-3.28362	0.00102482	0.0384325	Conserved hypothetical protein.
Os01t0593200-01	0.940516	4.12079	2.1314	-3.27219	0.00106719	0.0395406	Protein of unknown function DUF581 family protein.
Os10t0382600-01	1.27256	5.58016	2.13258	-3.41478	0.000638334	0.0281781	Conserved hypothetical protein.
Os03t0786750-00	0.538223	2.36535	2.13578	-3.31856	0.00090484	0.0355681	Similar to Cullin 4.
Os03t0584050-00	1.15178	5.06611	2.13702	-3.38871	0.000702218	0.029793	Hypothetical conserved gene.
Os01t0940000-01	7.29001	32.1029	2.13871	-3.95833	7.54747e-05	0.00684964	FAD linked oxidase, N-terminal domain containing protein.
Os04t0102500-01	1.17763	5.21364	2.1464	-3.46363	0.000532935	0.0248596	Similar to OSIGBa0123D13.3 protein.
Os01t0915900-01	2.09416	9.32655	2.15497	-3.66578	0.000246586	0.0151574	Conserved hypothetical protein.
Os08t0360300-00	0.697672	3.11065	2.15659	-3.27378	0.00106118	0.0393771
Os07t0669700-01	2.40472	10.7224	2.15668	-3.7566	0.000172236	0.0121085	Potassium transporter 4 (AtPOT4) (AtKUP3) (AtKT4).
Os04t0424200-00	0.346122	1.54548	2.1587	-3.18618	0.00144163	0.0476859	Similar to OSIGBa0076I14.10 protein.
Os04t0677700-00	0.504558	2.2536	2.15914	-3.39105	0.000696259	0.0296734	Similar to H0402C08.11 protein.
Os02t0768750-00	3.50261	15.6669	2.16122	-3.96698	7.27899e-05	0.0067021	Hypothetical conserved gene.
Os05t0571000-01	2.27636	10.2028	2.16417	-3.24184	0.00118759	0.0426297	WD40 repeat-like domain containing protein.
Os04t0507500-01	0.703435	3.15357	2.1645	-3.32934	0.000870506	0.0345347	Armadillo-like helical domain containing protein.
Os09t0396900-01	6.33197	28.4041	2.16537	-3.84648	0.000119825	0.00935697	Protein of unknown function DUF125, transmembrane family protein.
Os01t0276700-01	2.47422	11.1136	2.16728	-3.42173	0.000622237	0.0277655	Similar to Pyruvate kinase, cytosolic isozyme (EC 2.7.1.40) (PK).
Os03t0211600-01	4.667	20.9667	2.16753	-3.91906	8.88944e-05	0.00761941	Pentatricopeptide repeat domain containing protein.
Os06t0187500-00	0.854007	3.84598	2.17103	-3.37496	0.000738255	0.030793	Hypothetical conserved gene.
Os03t0162900-01	1.20757	5.44482	2.17278	-3.78569	0.000153283	0.0110921	Pentatricopeptide repeat domain containing protein.
Os04t0510200-01	1.75115	7.94709	2.18212	-3.65861	0.000253584	0.0153746	Similar to STYLOSA protein.
Os11t0195100-00	0.976802	4.44165	2.18496	-3.73893	0.000184806	0.0125759	Similar to Protein translocase subunit secA.
Os05t0255800-01	0.449573	2.04625	2.18635	-3.22411	0.00126365	0.0441043	Conserved hypothetical protein.
Os12t0273000-00	0.51057	2.33094	2.19073	-3.30768	0.000940729	0.0365301	Hypothetical conserved gene.
Os05t0164900-01	0.257758	1.18004	2.19474	-3.31601	0.00091313	0.0357657	Galactose oxidase/kelch, beta-propeller domain containing protein.
Os04t0421900-01	2.14805	9.83549	2.19497	-4.01886	5.84811e-05	0.00568231	Conserved hypothetical protein.
Os02t0299300-01	4.85169	22.2159	2.19503	-4.01932	5.83675e-05	0.00568231	Alpha/beta hydrolase fold-1 domain containing protein.
Os04t0615900-01	0.957784	4.39018	2.19651	-3.59541	0.000323885	0.0184152	FAR1 domain containing protein.
Os02t0708500-01	0.521899	2.39451	2.19789	-3.24161	0.00118857	0.0426297	Conserved hypothetical protein.
Os04t0643200-00	6.32236	29.0428	2.19965	-4.04971	5.1281e-05	0.00527254	Amidase family protein.
Os05t0515400-01	0.310676	1.43057	2.2031	-3.21058	0.00132468	0.0451489	Transcriptional factor B3 family protein.
Os04t0218600-02	1.20501	5.55581	2.20496	-3.80741	0.000140429	0.0103749	Conserved hypothetical protein.
Os05t0495600-00	1.12406	5.1897	2.20693	-3.80539	0.000141581	0.0103978	Similar to autoinhibited calcium ATPase.
Os03t0440200-00	0.43069	1.99342	2.21053	-3.33619	0.000849339	0.0339131	Similar to OSIGBa0076I14.10 protein.
Os03t0106200-01	1.46404	6.77768	2.21083	-3.46465	0.000530918	0.0248124	Conserved hypothetical protein.
Os06t0343100-01	2.36961	10.9739	2.21135	-3.38122	0.000721651	0.0302848	Similar to ATP-dependent helicase DHX8 (RNA helicase HRH1) (DEAH-box protein 8).
Os02t0529400-01	6.7365	31.2135	2.2121	-3.45171	0.00055705	0.025729	Plant neutral invertase family protein.
Os02t0702500-01	2.56265	11.9301	2.21889	-3.74344	0.000181521	0.0125468	Serine/threonine protein kinase domain containing protein.
Os04t0625350-01	0.267194	1.25106	2.22719	-3.44689	0.000567085	0.0260584	Similar to OSIGBa0148A10.3 protein.
Os05t0163250-01	3.9007	18.2756	2.22812	-4.04249	5.28869e-05	0.00534851	Similar to predicted protein.
Os05t0126400-01	6.67673	31.286	2.2283	-4.09918	4.14617e-05	0.00456746	Conserved hypothetical protein.
Os11t0635000-01	0.226217	1.07299	2.24586	-3.22175	0.00127409	0.044248	Hypothetical protein.
Os02t0781600-00	0.193096	0.916808	2.2473	-3.18554	0.00144483	0.0477279	Hypothetical conserved gene.
Os11t0207000-01	2.47781	11.7815	2.24938	-3.41557	0.000636479	0.0281465	Conserved hypothetical protein.
Os03t0399532-00	1.34751	6.40987	2.25	-3.71721	0.000201438	0.0132551	Similar to Chaperonin Cpn60/TCP-1; Phosphatidylinositol-4-phosphate 5-kinase; Zinc finger, FYVE/PHD-type.
Os03t0701000-01	3.17816	15.1222	2.25041	-3.53887	0.00040185	0.0210086	Armadillo-like helical domain containing protein.
Os01t0872100-01	0.936859	4.45829	2.25058	-3.43042	0.000602658	0.0272133	TGF-beta receptor, type I/II extracellular region family protein.
Os09t0544400-00	0.365286	1.73893	2.2511	-3.8484	0.000118892	0.00934325	Similar to glutathione transferase16.
Os12t0490100-01	0.31527	1.50087	2.25114	-3.3274	0.00087662	0.0347215	Pentatricopeptide repeat domain containing protein.
Os11t0273401-00	0.486086	2.33225	2.26244	-3.31316	0.000922492	0.0360181
Os03t0179900-01	1.5492	7.44078	2.26393	-3.87121	0.000108295	0.00864878	Similar to Avr9/Cf-9 rapidly elicited protein 44 (Fragment).
Os04t0585700-01	3.71785	17.8731	2.26525	-3.92171	8.79241e-05	0.00761269	Protein of unknown function DUF581 family protein.
Os12t0124100-01	0.258834	1.24725	2.26865	-3.59173	0.000328493	0.0185337	Similar to Disease resistance gene analog PIC13 (Fragment).
Os04t0621500-00	0.28455	1.3714	2.2689	-3.54059	0.000399232	0.020916	Hypothetical conserved gene.
Os04t0573000-01	0.777021	3.74695	2.26969	-3.75308	0.000174673	0.0121758	Major facilitator superfamily MFS_1 protein.
Os10t0374700-01	0.428975	2.07141	2.27165	-3.5161	0.000437941	0.0222359	Conserved hypothetical protein.
Os02t0126500-01	0.312595	1.50952	2.27172	-3.29638	0.000979386	0.0373529	Pentatricopeptide repeat domain containing protein.
Os12t0553200-01	1.10323	5.35848	2.28009	-3.8827	0.000103301	0.00838508	NB-ARC domain containing protein.
Os11t0470500-00	0.349417	1.70438	2.28622	-3.3185	0.000905028	0.0355681	Similar to Protein kinase domain containing protein, expressed.
Os07t0283050-00	4.04332	19.8617	2.29638	-4.19666	2.70879e-05	0.00353662	Concanavalin A-like lectin/glucanase, subgroup domain containing protein.
Os03t0711300-01	1.36071	6.68885	2.2974	-3.40412	0.000663764	0.0287856	Serine/threonine protein kinase domain containing protein.
Os11t0181900-01	0.738332	3.63311	2.29886	-3.63449	0.000278532	0.016657	Prefoldin domain containing protein.
Os10t0479100-01	2.27669	11.2281	2.30211	-3.38849	0.000702776	0.029793	Non-protein coding transcript.
Os02t0301450-00	2.69692	13.3015	2.30221	-3.7364	0.000186673	0.0125856	Hypothetical gene.
Os05t0414200-01	0.555527	2.73998	2.30224	-3.43484	0.000592912	0.027049	NB-ARC domain containing protein.
Os11t0256450-00	14.8463	73.233	2.30239	-3.71509	0.000203135	0.0133313
Os03t0859700-00	2.23462	11.0259	2.3028	-3.4743	0.00051219	0.0242378	Similar to RuBisCO subunit binding-protein alpha subunit, chloroplast precursor (60 kDa chaperonin alpha subunit) (CPN-60 alpha) (Fragment).
Os01t0714600-01	1.17454	5.81226	2.307	-3.51412	0.000441212	0.0223368	Conserved hypothetical protein.
Os05t0560400-00	1.00528	4.97967	2.30845	-3.49366	0.000476441	0.0234664	Tubby family protein.
Os04t0660200-01	1.2787	6.33994	2.30979	-3.99926	6.35399e-05	0.00605371	ABC-1 domain containing protein.
Os10t0442532-00	7.92191	39.3717	2.31324	-4.27359	1.92349e-05	0.00275954	Hypothetical gene.
Os11t0140400-01	2.67626	13.334	2.31682	-3.71958	0.000199554	0.0131663	Similar to autoinhibited calcium ATPase.
Os11t0629550-00	1.26752	6.3173	2.3173	-3.96759	7.26029e-05	0.0067021	Similar to Disease resistance protein RPM1 homolog.
Os01t0609300-01	0.373747	1.88022	2.33077	-3.30747	0.00094144	0.0365301	Similar to Pleiotropic drug resistance protein 3.
Os06t0111400-01	3.82396	19.298	2.33531	-3.31614	0.000912688	0.0357657	Guanine nucleotide binding protein (G-protein), alpha subunit family protein.
Os05t0535600-00	0.285536	1.4432	2.33752	-3.16756	0.00153721	0.0496906	Similar to predicted protein.
Os01t0152000-01	0.116312	0.588077	2.33801	-3.27959	0.00103957	0.0388672	Protein kinase, core domain containing protein.
Os03t0781100-00	0.253933	1.28558	2.33989	-3.366	0.000762675	0.0315197	Hypothetical conserved gene.
Os10t0400250-00	0.540785	2.73788	2.33993	-3.57252	0.000353558	0.0193423	Tetratricopeptide-like helical domain containing protein.
Os11t0131800-01	0.240874	1.22489	2.3463	-3.57681	0.000347809	0.0192465	Hypothetical gene.
Os05t0551650-01	0.643956	3.27704	2.34736	-3.23194	0.00122951	0.0434662	Hypothetical gene.
Os06t0634100-01	0.45751	2.33112	2.34915	-3.67305	0.000239669	0.0148969	RNA-directed DNA polymerase (reverse transcriptase) domain containing protein.
Os07t0122200-01	1.1669	5.98069	2.35764	-4.01314	5.99153e-05	0.00579793	Protein of unknown function DUF1719, Oryza sativa family protein.
Os03t0314100-01	2.82978	14.529	2.36018	-3.40618	0.000658791	0.0287723	DEAD-like helicase, N-terminal domain containing protein.
Os09t0537200-01	0.929696	4.77678	2.36121	-3.91173	9.16381e-05	0.00779745	Conserved hypothetical protein.
Os02t0788800-01	2.49284	12.8139	2.36185	-3.19306	0.00140775	0.0469428	Amino acid transporter, transmembrane domain containing protein.
Os06t0652000-01	10.0731	51.8522	2.3639	-3.34102	0.000834712	0.0333831	Similar to T3/T7-like RNA polymerase (Fragment).
Os01t0777000-00	1.03463	5.34625	2.36941	-4.08437	4.41968e-05	0.00479233	Vps51/Vps67 domain containing protein.
Os08t0198400-00	3.04882	15.768	2.37068	-4.05962	4.91529e-05	0.00509622
Os02t0167200-01	0.199703	1.03401	2.37233	-3.21979	0.00128284	0.0443973	Pentatricopeptide repeat domain containing protein.
Os02t0742051-01	0.935776	4.85147	2.37419	-3.57002	0.000356959	0.0194365	Hypothetical conserved gene.
Os08t0450700-01	2.7296	14.1562	2.37468	-4.2131	2.51885e-05	0.00341866	Chaperonin Cpn60/TCP-1 family protein.
Os05t0305600-01	0.392978	2.03991	2.37598	-3.8842	0.000102666	0.00836104	NB-ARC domain containing protein.
Os01t0817700-02	25.7944	134.364	2.38102	-3.50088	0.00046372	0.0232423	Similar to 2,3-bisphosphoglycerate-independent phosphoglycerate mutase (EC 5.4.2.1) (Phosphoglyceromutase) (BPG-independent PGAM) (PGAM-I).
Os02t0638650-01	0.463441	2.41592	2.38211	-3.59111	0.000329275	0.0185337	Pathogenesis-related transcriptional factor and ERF domain containing protein.
Os07t0111900-00	0.810364	4.22959	2.38387	-3.66561	0.000246747	0.0151574	Flavin-containing monooxygenase FMO family protein.
Os01t0781700-00	1.35699	7.09522	2.38644	-4.27004	1.95441e-05	0.00277166	Similar to Blast resistance protein Pi37.
Os01t0819700-01	0.343405	1.7982	2.38858	-3.30051	0.000965089	0.0371522	Hypothetical conserved gene.
Os10t0173000-01	1.53844	8.11654	2.3994	-3.51691	0.000436599	0.0222134	Conserved hypothetical protein.
Os02t0489550-00	2.10846	11.1282	2.39996	-4.27005	1.95429e-05	0.00277166	Hypothetical conserved gene.
Os07t0203800-01	0.93358	4.93039	2.40086	-3.49039	0.000482324	0.0236617	Conserved hypothetical protein.
Os05t0100100-01	0.324309	1.71645	2.40399	-3.19435	0.00140145	0.0467959	Conserved hypothetical protein.
Os02t0823800-01	0.53964	2.86971	2.41083	-3.374	0.000740842	0.030828	Conserved hypothetical protein.
Os05t0100500-01	4.19	22.3362	2.41436	-4.3302	1.48975e-05	0.00222795	Similar to Debaryomyces hansenii chromosome F of strain CBS767 of Debaryomyces hansenii.
Os04t0620066-00	8.72298	46.5479	2.41582	-4.44026	8.98483e-06	0.00158675	Similar to MRP-like ABC transporter (Fragment).
Os10t0572500-01	2.85765	15.3066	2.42125	-4.38981	1.13449e-05	0.00185396	Zinc finger, RING/FYVE/PHD-type domain containing protein.
Os02t0211800-00	0.134865	0.72415	2.42477	-3.29753	0.000975383	0.0372578	Hypothetical conserved gene.
Os10t0396666-00	1.32229	7.10284	2.42536	-3.56015	0.000370641	0.0197964	Hypothetical conserved gene.
Os08t0162200-01	0.169798	0.913844	2.42813	-3.23204	0.00122911	0.0434662	Pentatricopeptide repeat domain containing protein.
Os04t0691900-01	0.466884	2.51627	2.43015	-4.04308	5.27525e-05	0.00534851	Chaperonin Cpn60/TCP-1 family protein.
Os10t0320100-01	0.72149	3.89433	2.43232	-3.82939	0.000128464	0.00972593	Similar to Flavonoid 3'-monooxygenase (EC 1.14.13.21) (Flavonoid 3'-hydroxylase) (Cytochrome P450 75B2).
Os10t0521000-01	0.195874	1.0579	2.4332	-3.23879	0.0012004	0.0428602	Similar to TRE1 protein (Fragment).
Os04t0280500-00	2.14952	11.6425	2.43732	-3.97088	7.16086e-05	0.00664291	Conserved hypothetical protein.
Os01t0221700-00	3.52845	19.1358	2.43917	-4.19328	2.74944e-05	0.0035708	Similar to F22C12.9.
Os11t0695201-00	2.85144	15.4682	2.43954	-3.82828	0.000129044	0.00973791	Leucine-rich repeat, N-terminal domain containing protein.
Os06t0152500-00	0.147702	0.801738	2.44044	-3.16732	0.00153848	0.0496906	Hypothetical conserved gene.
Os06t0255300-01	6.08625	33.0608	2.4415	-3.35415	0.000796079	0.0325233	Hypothetical protein.
Os08t0276000-01	0.153482	0.834397	2.44267	-3.25321	0.0011411	0.0413476	Similar to Transmembrane protein TM9SF3 (Fragment).
Os10t0492000-01	13.4828	73.3254	2.4432	-4.48389	7.32954e-06	0.00139126	Similar to Chloroplast inner envelope protein, 110 kD (IEP110) precursor.
Os02t0226900-01	0.335991	1.83017	2.44548	-3.60235	0.000315359	0.0181394	Pentatricopeptide repeat domain containing protein.
Os07t0300100-01	0.155519	0.847698	2.44646	-3.81058	0.000138643	0.0102737	Hypothetical gene.
Os09t0569800-00	1.17602	6.41702	2.448	-3.93557	8.29979e-05	0.00726261	Serine/threonine protein kinase-related domain containing protein.
Os09t0536000-01	0.761596	4.17566	2.45491	-3.57515	0.000350022	0.0192793	Exodeoxyribonuclease III xth family protein.
Os08t0491000-01	0.313505	1.72054	2.4563	-3.26953	0.00107726	0.0397896	Hypothetical conserved gene.
Os09t0345300-01	0.771163	4.2553	2.46415	-4.18032	2.91103e-05	0.00368373	Similar to Receptor-like serine/threonine kinase.
Os03t0637800-01	0.0837731	0.463071	2.46668	-3.20554	0.00134811	0.0455076	Regulator of chromosome condensation/beta-lactamase-inhibitor protein II domain containing protein.
Os06t0645400-01	1.15875	6.42677	2.47152	-3.59944	0.000318906	0.0182925	Isoleucyl-tRNA synthetase domain containing protein.
Os03t0685700-01	0.89209	4.9626	2.47583	-4.15041	3.31883e-05	0.00403426	Tetratricopeptide-like helical domain containing protein.
Os01t0589900-00	0.2678	1.49006	2.47614	-3.74463	0.000180658	0.0125222	Hypothetical conserved gene.
Os10t0124400-00	0.331094	1.84395	2.47749	-3.29958	0.000968298	0.0372176	Hypothetical conserved gene.
Os03t0151300-01	0.900548	5.01912	2.47856	-3.90589	9.38795e-05	0.00793346	Similar to Early flowering 6.
Os05t0168500-01	1.60971	9.01693	2.48584	-3.77277	0.000161447	0.0115141	Nonaspanin (TM9SF) family protein.
Os07t0101200-01	0.405125	2.2714	2.48714	-3.83862	0.000123727	0.00956189	Pentatricopeptide repeat domain containing protein.
Os03t0110600-00	0.676636	3.82487	2.49896	-3.56301	0.000366621	0.0197097	Similar to LysM domain containing protein, expressed.
Os12t0156900-00	0.215248	1.22314	2.50652	-3.34368	0.000826754	0.0332483	Hypothetical conserved gene.
Os12t0594300-00	1.25711	7.14869	2.50757	-4.43222	9.32671e-06	0.00162075	Hypothetical conserved gene.
Os04t0641000-01	1.2056	6.90511	2.51792	-3.17484	0.00149921	0.0489346	Similar to DNA-directed RNA polymerase, subunit B (RNA polymerase IV second- largest subunit).
Os07t0273600-01	0.1609	0.92367	2.52121	-3.60401	0.000313347	0.0180658	Hypothetical protein.
Os07t0181000-01	3.45849	19.9402	2.52747	-4.30074	1.70226e-05	0.00249281	Similar to Pyruvate kinase isozyme A, chloroplast precursor (EC 2.7.1.40).
Os03t0281600-01	5.84848	33.7435	2.52848	-3.20374	0.00135654	0.045605	Similar to Ca2+-ATPase.
Os10t0421800-01	8.62454	49.794	2.52945	-4.61485	3.93388e-06	0.000911904	Pentatricopeptide repeat domain containing protein.
Os02t0162766-01	0.198679	1.15033	2.53354	-3.57377	0.000351882	0.0193352	Hypothetical conserved gene.
Os03t0309200-01	4.34856	25.1801	2.53368	-4.12722	3.67173e-05	0.00429401	Similar to Phytochrome B.
Os12t0594200-00	0.650848	3.7687	2.53368	-4.21287	2.52147e-05	0.00341866	Hypothetical conserved gene.
Os01t0795000-01	0.843611	4.88731	2.53439	-3.88662	0.000101648	0.00833313	Subtilase.
Os06t0558766-00	8.74772	50.6872	2.53464	-4.65141	3.29672e-06	0.0008301	Similar to predicted protein.
Os06t0690900-00	0.413374	2.40161	2.53848	-3.98956	6.61959e-05	0.00625843	Pentatricopeptide repeat domain containing protein.
Os11t0226201-00	3.86334	22.5121	2.54278	-4.42851	9.48862e-06	0.00162932	Similar to Protein kinase domain containing protein, expressed.
Os07t0569000-01	0.509617	2.97175	2.54383	-4.17341	3.00079e-05	0.00375876	Conserved hypothetical protein.
Os10t0503700-01	3.36065	19.6233	2.54576	-3.47032	0.000519843	0.024527	Similar to RNA helicase (Fragment).
Os06t0254600-01	8.64891	50.5069	2.54589	-4.60631	4.09877e-06	0.0009279	Caleosin related family protein.
Os09t0557800-01	2.23748	13.1333	2.55328	-4.40439	1.06084e-05	0.00178077	Similar to transmembrane 9 superfamily protein member 4.
Os04t0337201-00	1.45086	8.52159	2.55422	-4.46105	8.15573e-06	0.00152463	Similar to OSIGBa0137O04.8 protein.
Os11t0494100-00	1.22804	7.2133	2.5543	-4.11862	3.81146e-05	0.00435831	Similar to NB-ARC domain containing protein.
Os09t0537700-02	48.6641	285.88	2.55448	-4.53891	5.65466e-06	0.00115318	Ribonuclease T2 family protein.
Os10t0419400-01	0.864262	5.08599	2.55699	-3.69441	0.000220399	0.0141999	Similar to SIPL.
Os05t0392050-00	0.239917	1.41531	2.56051	-3.2279	0.00124704	0.0438348	Hypothetical conserved gene.
Os07t0546750-00	0.162583	0.960503	2.56261	-3.42553	0.000613612	0.0274302	Hypothetical conserved gene.
Os09t0503400-01	2.03993	12.0659	2.56435	-3.25336	0.00114049	0.0413476	Leucyl-tRNA synthetase, class Ia, archaeal/eukaryotic cytosolic domain containing protein.
Os10t0133600-01	1.16311	6.92999	2.57487	-3.62169	0.000292684	0.0171959	Protein kinase-like domain containing protein.
Os12t0566150-00	1.52767	9.12088	2.57784	-3.95435	7.67425e-05	0.00691131	Similar to predicted protein.
Os04t0538166-00	1.4269	8.52169	2.57826	-3.56421	0.000364957	0.019663	Similar to Elongation factor G (EF-G).
Os01t0332100-01	26.3806	157.611	2.57882	-3.68719	0.000226748	0.0144579	Similar to Neutral invertase-like protein (Fragment).
Os06t0113150-00	0.996645	5.97155	2.58295	-4.11841	3.81502e-05	0.00435831	Similar to predicted protein.
Os07t0438500-01	1.331	7.98728	2.58519	-4.55201	5.31346e-06	0.00112823	Octicosapeptide/Phox/Bem1p domain containing protein.
Os04t0410200-00	0.540055	3.24722	2.58803	-4.11112	3.93737e-05	0.00439631	Similar to H0321H01.14 protein.
Os01t0558850-00	0.351698	2.1195	2.59132	-3.79531	0.000147456	0.0107334	Similar to peptidase M16 family protein / insulinase family protein.
Os05t0148101-00	0.526197	3.17932	2.59505	-3.26644	0.00108907	0.0400506	Hypothetical conserved gene.
Os01t0964800-01	1.05517	6.39278	2.59896	-4.33615	1.45e-05	0.00218172	Similar to Chromosome condensation regulator protein (Fragment).
Os02t0553802-01	1.62245	9.85645	2.60289	-4.61726	3.88832e-06	0.000911904	Hypothetical conserved gene.
Os09t0252700-01	0.460891	2.80092	2.60341	-4.24999	2.13781e-05	0.00298746	Similar to E3 ubiquitin protein ligase UPL1 (EC 6.3.2.-) (Ubiquitin-protein ligase 1).
Os03t0107400-01	0.990186	6.01779	2.60346	-4.4861	7.25375e-06	0.00138755	Prefoldin domain containing protein.
Os04t0475000-01	0.210427	1.28053	2.60535	-3.72435	0.00019582	0.0130393	Conserved hypothetical protein.
Os02t0589000-01	2.49431	15.2916	2.61602	-4.50889	6.51678e-06	0.00127625	Lecithin:cholesterol acyltransferase family protein.
Os02t0470850-00	0.432704	2.6531	2.61623	-3.57323	0.000352602	0.0193352	Similar to predicted protein.
Os06t0289900-01	1.17253	7.19893	2.61816	-4.33633	1.44883e-05	0.00218172	UDP-glucuronosyl/UDP-glucosyltransferase family protein.
Os04t0671300-01	14.7112	90.5188	2.62131	-4.74257	2.11024e-06	0.000604235	Similar to Suppressor of presenilin 5 (P110b homolog).
Os03t0221100-00	0.684744	4.22536	2.62544	-3.91932	8.87988e-05	0.00761941	Hypothetical conserved gene.
Os03t0192800-01	0.665351	4.11311	2.62804	-3.88804	0.000101057	0.00831591	Similar to Ubiquitin-specific protease 26.
Os08t0411900-01	0.648818	4.01137	2.62821	-4.1032	4.07482e-05	0.00450898	NB-ARC domain containing protein.
Os06t0318800-01	5.92351	36.6931	2.63099	-4.44736	8.69328e-06	0.00157695	Hypothetical conserved gene.
Os03t0212700-01	2.00264	12.4117	2.63173	-3.50165	0.000462384	0.0232379	Similar to Cytochrome C reductase-processing peptidase subunit I, MPP subunit I, P55.
Os09t0557700-00	0.322133	2.0055	2.63823	-3.97657	6.99165e-05	0.00653508	DOMON domain containing protein.
Os09t0560100-00	0.5819	3.62966	2.64099	-4.09177	4.28099e-05	0.00469501	Hypothetical conserved gene.
Os05t0563100-01	0.763321	4.77871	2.64626	-3.73655	0.000186565	0.0125856	Guanylate-binding protein family protein.
Os02t0297800-00	0.350744	2.20168	2.65011	-3.88793	0.000101101	0.00831591	Similar to lectin-like receptor kinase 7.
Os02t0318500-00	0.772232	4.85033	2.65098	-4.3445	1.39591e-05	0.00215492	Similar to PDR-like ABC transporter.
Os10t0116000-00	0.385353	2.42613	2.65441	-4.11544	3.86441e-05	0.00437086
Os02t0581400-01	0.482387	3.04432	2.65786	-3.95824	7.55026e-05	0.00684964	Similar to 2-succinyl-6-hydroxy-2, 4-cyclohexadiene-1-carboxylate synthase (EC 4.1.1.71).
Os05t0462400-01	1.30277	8.2477	2.66241	-4.68176	2.84422e-06	0.000762869	Lipin, N-terminal conserved region domain containing protein.
Os03t0625700-00	1.41085	8.95634	2.66635	-4.17566	2.97121e-05	0.0037407	Similar to Roothairless 1.
Os04t0675400-01	7.42445	47.1773	2.66774	-4.89679	9.74147e-07	0.000364213	Similar to Chaperone protein dnaJ.
Os05t0391500-01	0.481004	3.06345	2.67104	-4.38017	1.18586e-05	0.00192515	Similar to Endo-beta-mannosidase.
Os09t0407950-01	0.881329	5.61321	2.67107	-4.59629	4.30074e-06	0.000953983	Similar to transducin family protein / WD-40 repeat family protein.
Os11t0692100-00	0.144243	0.92462	2.68035	-3.43093	0.000601516	0.0272133	Similar to Leucine Rich Repeat family protein.
Os03t0314400-01	0.191427	1.23311	2.68744	-3.74962	0.000177099	0.0123102	Pentatricopeptide repeat domain containing protein.
Os01t0976100-01	0.176846	1.14344	2.69282	-3.52177	0.000428683	0.0219464	ABC transporter-like domain containing protein.
Os02t0156600-00	0.310138	2.01045	2.69654	-3.91897	8.89281e-05	0.00761941	Hypothetical conserved gene.
Os06t0167100-01	1.0339	6.75955	2.70883	-3.6811	0.000232228	0.0146935	Armadillo-like helical domain containing protein.
Os05t0227600-00	6.29318	41.2056	2.71098	-4.74065	2.13035e-06	0.000604234	Similar to Proline-rich protein.
Os01t0128200-01	0.597834	3.93046	2.71688	-3.62935	0.000284131	0.0168135	Similar to Nuclease I.
Os06t0102100-01	1.84695	12.1732	2.72048	-4.73147	2.22903e-06	0.00062113	Cytochrome P450 family protein.
Os03t0308800-01	20.6903	137.029	2.72745	-3.25054	0.00115185	0.041615	Tetratricopeptide-like helical domain containing protein.
Os04t0555600-01	0.477158	3.1704	2.73213	-4.51209	6.41914e-06	0.00126719	Concanavalin A-like lectin/glucanase domain containing protein.
Os11t0210600-01	0.731065	4.85841	2.73241	-4.12527	3.70302e-05	0.00431017	Similar to Alcohol dehydrogenase (Fragment).
Os08t0154225-00	0.235376	1.56764	2.73556	-3.75324	0.000174563	0.0121758	Similar to predicted protein.
Os07t0472100-00	0.0982797	0.655392	2.73739	-3.47421	0.000512369	0.0242378	Hypothetical conserved gene.
Os04t0473900-00	0.0820646	0.550774	2.74663	-4.00025	6.3275e-05	0.00605184	Similar to OSIGBa0135C13.1 protein.
Os08t0307200-00	0.839236	5.65277	2.75181	-4.63309	3.60256e-06	0.000874946	Hypothetical conserved gene.
Os09t0402350-00	0.58542	3.9443	2.75223	-3.95453	7.66857e-05	0.00691131	Similar to phosphatidylinositol-4-phosphate 5-kinase family protein.
Os12t0552300-00	0.0912151	0.615913	2.75538	-3.49915	0.000466753	0.023315	Hypothetical conserved gene.
Os04t0499300-01	3.313	22.3848	2.7563	-3.21839	0.00128911	0.0444896	MIF4-like, type 1/2/3 domain containing protein.
Os08t0508500-00	2.37258	16.0643	2.75933	-4.82137	1.42573e-06	0.000475423	Similar to predicted protein.
Os11t0625900-01	0.642982	4.36555	2.76331	-3.59895	0.000319504	0.0182925	Protein kinase, core domain containing protein.
Os10t0442950-00	0.398008	2.7089	2.76684	-4.18446	2.85845e-05	0.00367371	Similar to white-brown-complex ABC transporter family.
Os02t0456000-01	0.215026	1.4788	2.78184	-3.82225	0.00013224	0.00990747	COG4 transport domain containing protein.
Os05t0548900-01	60.3315	416.222	2.78637	-4.45258	8.4846e-06	0.00156243	Similar to Phosphoethanolamine methyltransferase.
Os03t0308900-01	0.551608	3.80772	2.78721	-4.18097	2.90265e-05	0.00368373	Conserved hypothetical protein.
Os08t0202400-01	0.498687	3.45616	2.79296	-4.53023	5.89202e-06	0.00119173	NB-ARC domain containing protein.
Os02t0532300-02	0.62144	4.30889	2.79363	-4.05962	4.91531e-05	0.00509622	Alpha/beta hydrolase fold-1 domain containing protein.
Os02t0470600-00	0.305227	2.12352	2.79851	-4.03024	5.57191e-05	0.00558912	Hypothetical conserved gene.
Os02t0101750-00	1.88467	13.1573	2.80348	-4.78529	1.70745e-06	0.000514979	Hypothetical gene.
Os11t0694600-00	0.0938934	0.657009	2.80682	-3.5651	0.000363722	0.019663	Similar to Leucine Rich Repeat family protein, expressed.
Os05t0464001-00	0.553044	3.89304	2.81543	-3.68594	0.000227863	0.0144916	Hypothetical conserved gene.
Os06t0611200-00	0.139618	0.983965	2.81713	-3.69894	0.000216505	0.0139856	Pentatricopeptide repeat domain containing protein.
Os12t0456100-00	0.225688	1.59232	2.81873	-4.1973	2.70111e-05	0.00353662	Hypothetical conserved gene.
Os07t0165200-01	0.583682	4.12585	2.82144	-4.59488	4.32996e-06	0.000953983	Ankyrin domain containing protein.
Os04t0566900-01	0.108886	0.770913	2.82375	-3.85353	0.000116426	0.00917869	Spc97/Spc98 domain containing protein.
Os02t0736200-01	0.14337	1.01568	2.82463	-3.80572	0.000141394	0.0103978	Similar to RNA-directed RNA polymerase (EC 2.7.7.48).
Os03t0356700-01	1.80733	12.8268	2.82723	-4.52013	6.18012e-06	0.00123313	Similar to Villin 3.
Os04t0151800-01	1.76147	12.5377	2.83142	-4.13709	3.51736e-05	0.00421992	Argonaute and Dicer protein, PAZ domain containing protein.
Os01t0374200-00	0.138882	0.994875	2.84066	-3.46851	0.000523346	0.0246393	Hypothetical conserved gene.
Os01t0552000-01	0.204562	1.47894	2.85395	-4.06284	4.84791e-05	0.00506894	Hypothetical conserved gene.
Os11t0485900-01	0.301518	2.18768	2.85909	-3.17599	0.00149326	0.0488836	Similar to NBS-LRR type resistance protein (Fragment).
Os05t0527532-00	0.267275	1.94324	2.86207	-3.22436	0.00126255	0.0441043	Hypothetical gene.
Os01t0773000-01	0.476387	3.46621	2.86315	-4.34054	1.42132e-05	0.00216496	Similar to RNA binding / pseudouridylate synthase/ tRNA-pseudouridine synthase.
Os04t0585100-01	0.0761109	0.555177	2.86677	-3.31091	0.000929916	0.0362506	Zinc finger, DHHC-type domain containing protein.
Os02t0152800-01	0.972851	7.11604	2.87078	-4.64435	3.41145e-06	0.00084397	RNA polymerase Rpb1, domain 1 containing protein.
Os01t0915501-00	0.344992	2.52955	2.87425	-4.02902	5.60106e-05	0.00559562	Hypothetical conserved gene.
Os05t0148200-00	0.456639	3.35526	2.8773	-3.65613	0.000256048	0.0154859	Hypothetical conserved gene.
Os03t0794800-01	1.25647	9.24358	2.87907	-3.59644	0.000322599	0.0184152	Similar to XRN3.
Os03t0858100-01	2.04395	15.0476	2.88011	-3.89719	9.73163e-05	0.00813676	Similar to CRM1 protein (Fragment).
Os06t0728550-01	1.44246	10.693	2.89006	-4.5506	5.34944e-06	0.00112823	Non-protein coding transcript.
Os11t0137300-01	0.398651	2.96346	2.89408	-3.69081	0.000223543	0.014365	Armadillo-type fold domain containing protein.
Os01t0600400-01	0.829223	6.17072	2.89561	-4.08292	4.44741e-05	0.00479233	Pentatricopeptide repeat domain containing protein.
Os08t0104700-01	0.490717	3.67713	2.90562	-3.61814	0.000296724	0.0173918	Chaperonin Cpn60/TCP-1 family protein.
Os01t0841800-01	5.60903	42.2109	2.91179	-5.31437	1.07029e-07	7.13799e-05	Ribonuclease II and R domain containing protein.
Os09t0376800-01	0.306361	2.3223	2.92225	-4.16633	3.09545e-05	0.00381882	Similar to Trehalose-6-phosphate synthase (Fragment).
Os01t0624000-02	1.53224	11.6473	2.92628	-4.28723	1.80916e-05	0.00262605	Neutral/alkaline nonlysosomal ceramidase family protein.
Os07t0621100-00	0.222355	1.69915	2.93387	-4.0484	5.15689e-05	0.00528015	Hypothetical conserved gene.
Os04t0369600-00	0.262727	2.00865	2.93459	-3.74139	0.000183006	0.0125733	Similar to OSIGBa0107E14.3 protein.
Os06t0230100-00	0.10677	0.819852	2.94086	-3.40272	0.000667188	0.0288834	Similar to predicted protein.
Os12t0222900-01	0.496199	3.81861	2.94406	-3.7029	0.000213149	0.0138049	Leucine-rich repeat, N-terminal domain containing protein.
Os01t0263400-00	0.16231	1.25125	2.94655	-4.20601	2.5992e-05	0.00346691
Os02t0156400-01	0.0641657	0.496058	2.95064	-3.35804	0.000784959	0.0321221	Leucine-rich repeat, N-terminal domain containing protein.
Os08t0538000-01	2.72851	21.1887	2.95711	-3.28817	0.00100839	0.0380476	Similar to Glycyl-tRNA synthetase, mitochondrial precursor (EC 6.1.1.14) (Glycine--tRNA ligase) (GlyRS).
Os02t0157200-00	0.0996515	0.776819	2.96261	-3.63205	0.000281182	0.0166998	Leucine-rich repeat, N-terminal domain containing protein.
Os10t0565401-00	0.792308	6.21994	2.97277	-3.9033	9.48905e-05	0.00799153	Hypothetical conserved gene.
Os01t0971800-00	2.35574	18.6764	2.98697	-5.09956	3.40446e-07	0.000168017	Similar to Two-component response regulator ARR11 (Receiver-like protein 3).
Os07t0645700-01	0.105214	0.834776	2.98807	-3.94356	8.02807e-05	0.0071412	Conserved hypothetical protein.
Os04t0605500-02	2.09396	16.6687	2.99284	-3.58353	0.00033898	0.0188819	Similar to Calcium-transporting ATPase 8, plasma membrane-type (EC 3.6.3.8) (Ca(2+)-ATPase isoform 8).
Os06t0709400-01	0.122957	0.987759	3.00601	-3.48413	0.000493746	0.0239215	FAR1 domain containing protein.
Os11t0312340-00	4.18012	33.6905	3.01073	-4.30242	1.68942e-05	0.00249281	Similar to predicted protein.
Os04t0164900-01	0.307456	2.47862	3.01109	-4.36163	1.29097e-05	0.00202905	Similar to Starch debranching enzyme.
Os08t0520550-01	1.00153	8.0788	3.01193	-5.02183	5.11815e-07	0.000238293	Similar to Auxin response factor 21.
Os03t0355600-01	1.17429	9.52311	3.01964	-3.60841	0.000308085	0.01793	Similar to Adapter-related protein complex 2 beta 1 subunit (Beta-adaptin) (Plasma membrane adaptor HA2/AP2 adaptin beta subunit) (Clathrin assembly protein complex 2 beta large chain) (AP105B) (Fragment).
Os03t0165701-00	1.1476	9.31858	3.02149	-5.22227	1.76744e-07	0.000103841	Similar to Ubiquitin carboxyl-terminal hydrolase family protein, expressed.
Os10t0559700-02	1.56684	12.8025	3.0305	-5.45119	5.00332e-08	4.25731e-05	Conserved hypothetical protein.
Os10t0170300-01	0.0874621	0.735675	3.07234	-3.93786	8.22112e-05	0.00721937	Alkaline-phosphatase-like, core domain domain containing protein.
Os09t0281900-01	0.538801	4.56809	3.08377	-3.88048	0.000104251	0.00843441	Thyroid hormone receptor-associated protein complex component TRAP170- like protein.
Os07t0523965-01	1.60523	13.6645	3.08958	-5.01612	5.27248e-07	0.000240933	Similar to Glucose-6-phosphate/phosphate-translocator precursor.
Os01t0321501-00	6.46722	55.4989	3.10124	-5.60231	2.11519e-08	2.37248e-05	Similar to Protein translocase subunit secA.
Os06t0367100-01	0.6182	5.314	3.10365	-4.49305	7.02097e-06	0.00135351	Glycoside hydrolase, subgroup, catalytic core domain containing protein.
Os10t0112600-01	0.258314	2.22596	3.10723	-4.45299	8.46817e-06	0.00156243	Nonaspanin (TM9SF) family protein.
Os07t0578800-00	0.201777	1.75042	3.11687	-4.23256	2.31051e-05	0.00318515	Hypothetical conserved gene.
Os01t0534700-00	0.100626	0.875624	3.1213	-3.17207	0.00151358	0.0492731	Similar to MDR-like ABC transporter.
Os04t0522500-01	0.0820387	0.717224	3.12805	-3.1806	0.00146969	0.0482903	2OG-Fe(II) oxygenase domain containing protein.
Os12t0187500-00	0.242019	2.14242	3.14605	-4.03586	5.44018e-05	0.00547926
Os02t0791700-00	0.156697	1.38717	3.14609	-4.16894	3.06015e-05	0.00381375	Similar to STE20/SPS1-related proline-alanine-rich protein kinase.
Os07t0568000-01	0.23294	2.06829	3.15041	-3.30358	0.000954581	0.0368822	Apolipophorin III-like domain containing protein.
Os03t0136900-01	2.15556	19.177	3.15324	-3.58739	0.000334009	0.0186894	Similar to Aconitate hydratase, cytoplasmic (EC 4.2.1.3) (Citrate hydro-lyase) (Aconitase).
Os10t0342300-01	0.0428508	0.387605	3.17719	-3.21861	0.00128816	0.0444896	Serine/threonine protein kinase-related domain containing protein.
Os08t0508700-01	0.0447393	0.405047	3.17847	-3.23842	0.00120195	0.0428602	Similar to EIL3.
Os02t0664100-00	0.692172	6.27226	3.17978	-4.75288	2.00543e-06	0.00058912	Hypothetical conserved gene.
Os01t0367300-01	2.00026	18.2866	3.19253	-3.8777	0.000105448	0.008478	Nucleotide-binding, alpha-beta plait domain containing protein.
Os02t0830801-01	0.216643	1.98838	3.1982	-4.6569	3.21e-06	0.000825104	Similar to binding.
Os06t0301300-00	0.555596	5.10255	3.19911	-5.07656	3.84326e-07	0.000185954	Similar to predicted protein.
Os05t0455900-01	0.0369956	0.345988	3.2253	-3.76615	0.000165782	0.0117891	Pentatricopeptide repeat domain containing protein.
Os06t0181100-01	0.124773	1.16829	3.22702	-3.98498	6.74864e-05	0.00633192	Octicosapeptide/Phox/Bem1p domain containing protein.
Os08t0450800-01	2.42238	22.8048	3.23484	-3.74099	0.000183294	0.0125733	Phosphatidylinositol-4-phosphate 5-kinase family protein.
Os07t0648266-00	1.19028	11.236	3.23876	-5.7122	1.11525e-08	1.40572e-05	Similar to 2-oxo acid dehydrogenase, lipoyl-binding site.
Os04t0560500-00	1.00037	9.50816	3.24864	-5.18271	2.18684e-07	0.000119917	Hypothetical conserved gene.
Os01t0765200-01	0.378859	3.62425	3.25795	-4.61378	3.95419e-06	0.000911904	Conserved hypothetical protein.
Os02t0109501-00	0.062622	0.601075	3.2628	-3.33058	0.000866639	0.0344367	Hypothetical conserved gene.
Os03t0793600-00	0.0642395	0.617073	3.26391	-3.33171	0.000863129	0.0343525	Similar to type I inositol-1,4,5-trisphosphate 5-phosphatase CVP2.
Os03t0808100-01	0.127891	1.23267	3.2688	-3.89333	9.88767e-05	0.00818752	Similar to Cellulose synthase-5.
Os08t0544500-01	0.355848	3.46914	3.28524	-3.67796	0.000235107	0.0147621	Similar to ARP2/3 regulatory protein subunit NAPP.
Os10t0479200-00	0.306375	3.0124	3.29755	-4.92203	8.56525e-07	0.000330244	Hypothetical conserved gene.
Os02t0203500-00	0.513937	5.06165	3.29994	-4.81305	1.48647e-06	0.000486257	Similar to NBS resistance protein.
Os04t0198300-00	0.156198	1.54598	3.30707	-4.61061	4.0148e-06	0.000917307	Hypothetical conserved gene.
Os12t0263050-00	0.518541	5.13585	3.30807	-3.84651	0.000119813	0.00935697	Conserved hypothetical protein.
Os01t0775500-01	1.10354	10.9763	3.31419	-5.26721	1.3851e-07	8.60598e-05	Mannose-binding lectin domain containing protein.
Os10t0196000-01	0.157248	1.59054	3.3384	-4.24023	2.23292e-05	0.00309548	Similar to Cytochrome P450 98A1 (EC 1.14.-.-).
Os05t0130300-01	0.444355	4.51758	3.34576	-4.44934	8.61354e-06	0.00157443	Conserved hypothetical protein.
Os08t0527400-01	0.034948	0.371481	3.41001	-3.49539	0.000473367	0.0234037	Similar to Ubiquitin carboxyl-terminal hydrolase.
Os01t0170050-00	0.0924875	0.988339	3.41768	-3.50052	0.000464357	0.0232423	Similar to Stachyose synthase.
Os07t0599201-00	0.0727943	0.787721	3.43579	-3.52181	0.000428603	0.0219464	Hypothetical conserved gene.
Os07t0432800-01	0.0728862	0.790761	3.43952	-3.99054	6.59238e-05	0.00625668	Myb transcription factor domain containing protein.
Os12t0105975-00	0.904251	9.8285	3.44218	-5.30569	1.12248e-07	7.28902e-05	Similar to Ubiquitin-activating enzyme E1.
Os01t0848700-01	0.107941	1.18794	3.46015	-3.52754	0.000419441	0.021653	Similar to Ras-related protein Rab11C.
Os02t0161300-01	0.675921	7.46382	3.46499	-5.40089	6.63096e-08	4.95835e-05	Conserved hypothetical protein.
Os03t0203050-00	0.343343	3.79368	3.46587	-5.43859	5.37029e-08	4.27475e-05	Hypothetical conserved gene.
Os02t0783650-01	0.0625826	0.703242	3.49019	-3.56234	0.000367559	0.0197172	Hypothetical gene.
Os01t0818700-01	2.37317	27.0661	3.5116	-6.09062	1.12471e-09	1.98239e-06	Leucine-rich repeat, N-terminal domain containing protein.
Os10t0556700-00	0.255904	2.94163	3.52294	-4.8334	1.34219e-06	0.000453696	Hypothetical conserved gene.
Os09t0565450-00	0.0712419	0.82798	3.5388	-4.16521	3.11064e-05	0.00381882	Hypothetical conserved gene.
Os04t0432800-00	0.0565365	0.673079	3.57352	-3.67609	0.000236833	0.0148275	Similar to H0315E07.3 protein.
Os02t0687900-01	0.238058	2.87354	3.59344	-4.93917	7.84558e-07	0.000322663	Peptidase S10, serine carboxypeptidase family protein.
Os12t0162800-01	0.0753869	0.923322	3.61445	-3.72063	0.000198727	0.0131469	Conserved hypothetical protein.
Os05t0132000-00	0.166209	2.04232	3.61914	-4.85444	1.20726e-06	0.000419583	Pentatricopeptide repeat domain containing protein.
Os01t0915400-00	0.194436	2.47621	3.67077	-3.77613	0.000159283	0.0114591	Similar to SEC (SECRET AGENT); transferase, transferring glycosyl groups.
Os07t0599100-00	0.0362468	0.46933	3.69468	-3.81255	0.000137543	0.0102538	Hypothetical conserved gene.
Os04t0675200-01	0.173941	2.27922	3.71187	-5.5928	2.2344e-08	2.39722e-05	Hypothetical protein.
Os03t0789466-00	0.134602	1.81954	3.7568	-4.44278	8.88059e-06	0.00158675	Similar to Protein argonaute MEL1.
Os12t0433200-01	0.912257	12.457	3.77137	-5.18875	2.11713e-07	0.000118733	Zinc finger, CCHC-type domain containing protein.
Os02t0122900-01	0.0953738	1.3105	3.78038	-4.47517	7.635e-06	0.00143818	Similar to Dimethyladenosine transferase.
Os03t0638000-00	0.197918	2.72303	3.78224	-3.9006	9.59526e-05	0.00805349	Similar to Centromere protein-like protein (Fragment).
Os04t0409200-00	8.79913	121.577	3.78837	-6.71653	1.86098e-11	5.10239e-08	Similar to H0321H01.10 protein.
Os09t0337500-01	0.096152	1.35311	3.81482	-4.98326	6.25206e-07	0.000275493	Conserved hypothetical protein.
Os04t0436350-00	0.107571	1.51724	3.81808	-4.78723	1.69097e-06	0.000514979	Pentatricopeptide repeat domain containing protein.
Os02t0636600-00	0.15013	2.20008	3.87327	-4.00569	6.18361e-05	0.00593723	GRAM domain containing protein.
Os05t0581300-00	0.0517704	0.795819	3.94224	-4.0891	4.33042e-05	0.0047282	Hypothetical conserved gene.
Os09t0489200-00	0.0772604	1.20211	3.95969	-4.1072	4.00478e-05	0.00445144	Similar to transcription factor jumonji (jmjC) domain-containing protein.
Os01t0571000-02	0.14371	2.3146	4.00953	-3.75881	0.000170725	0.0120366	Similar to Grave disease carrier protein.
Os04t0369100-00	0.0850949	1.39062	4.03051	-4.79984	1.58794e-06	0.000506834	Similar to H0607F01.9 protein.
Os03t0554950-00	0.144462	2.39257	4.0498	-4.20447	2.61697e-05	0.00347185	Hypothetical conserved gene.
Os03t0112101-00	0.542194	9.00331	4.05357	-6.14176	8.16133e-10	1.54915e-06	Similar to Adaptin N terminal region family protein, expressed.
Os11t0618850-00	0.035769	0.622295	4.12082	-3.18775	0.00143386	0.0474924	Hypothetical conserved gene.
Os06t0231100-00	0.0369652	0.643838	4.12246	-3.18902	0.00142756	0.0473675
Os05t0199100-01	0.0468977	0.824646	4.13618	-3.19964	0.00137601	0.0461337	Conserved hypothetical protein.
Os10t0556600-00	0.162264	2.899	4.15914	-4.96338	6.92754e-07	0.000294731	Similar to predicted protein.
Os11t0694850-00	0.0309131	0.581107	4.23251	-3.915	9.04045e-05	0.00771911	Similar to Leucine Rich Repeat family protein.
Os11t0213500-00	0.123875	2.40074	4.27652	-5.11855	3.07887e-07	0.000157953
Os10t0550066-00	0.0470753	0.939788	4.31929	-3.35054	0.000806538	0.03268	Hypothetical conserved gene.
Os03t0115800-01	0.162736	3.30579	4.34439	-5.50959	3.59674e-08	3.41358e-05	Conserved hypothetical protein.
Os03t0184100-01	0.92716	19.9223	4.42542	-7.09805	1.26521e-12	4.46005e-09	Hypothetical protein.
Os08t0556500-00	0.319968	7.16874	4.48572	-3.46788	0.000524584	0.0246393	Similar to predicted protein.
Os07t0618700-01	0.0968074	2.23457	4.52874	-4.74886	2.04571e-06	0.000593882	Conserved hypothetical protein.
Os06t0645901-00	0.24514	5.75914	4.55418	-5.79751	6.73052e-09	9.2268e-06	Similar to Transcription initiation factor TFIID subunit 1.
Os08t0176150-00	0.057462	1.35185	4.55618	-3.54546	0.000391927	0.0207092	Similar to SERK family receptor-like protein kinase (Fragment).
Os01t0871800-01	0.0178055	0.419804	4.55932	-3.55068	0.000384236	0.0204341	TGF-beta receptor, type I/II extracellular region family protein.
Os06t0493801-00	0.0275176	0.66758	4.60051	-3.5841	0.000338238	0.0188819	Hypothetical conserved gene.
Os05t0146100-01	0.0241274	0.639566	4.72835	-3.69007	0.000224188	0.014369	PDZ/DHR/GLGF domain containing protein.
Os05t0226000-00	0.0538538	1.48154	4.78191	-3.73248	0.000189607	0.012714	Conserved hypothetical protein.
Os02t0581000-00	0.0371307	1.08387	4.86743	-3.80441	0.000142142	0.010408	Similar to predicted protein.
Os09t0436800-01	0.0505689	1.51941	4.90912	-3.83808	0.000123999	0.00956189	Abortive infection protein family protein.
Os01t0899425-00	1.45196	44.7736	4.94657	-7.83526	4.66294e-15	3.83542e-11	Similar to ribulose-1,5-bisphosphate carboxylase/oxygenase large subunit.
Os02t0697400-01	0.0239186	1.02684	5.42393	-3.71126	0.000206229	0.0134272	Similar to 4-coumarate--CoA ligase 1 (EC 6.2.1.12) (4CL 1) (4-coumaroyl-CoA synthase 1) (Clone 4CL14) (Fragment).
Os07t0153150-00	0.289764	17.612	5.92554	-8.45299	0	0
Os08t0410900-01	0.210527	13.1449	5.96435	-7.95197	1.77636e-15	2.19167e-11	Hypothetical gene.
Os01t0549300-01	0.0150949	2.11806	7.13254	-4.11663	3.84452e-05	0.00437086	Homeodomain-like containing protein.
Os08t0178900-00	0.0150949	5.85996	8.60069	-4.99143	5.99343e-07	0.000268898	Homeodomain-like containing protein.
